# Supplementary material
Source: publisher figshare collection journal article supplement (https://acs.figshare.com/ndownloader/files/5490776)
Supplement: Supplementary file 1 [file 5490776]

data_3a

_audit_creation_method            SHELXL-2014
_chemical_name_systematic
;
 ?
;
_chemical_name_common             ?
_chemical_melting_point           ?
_chemical_formula_moiety          ?
_chemical_formula_sum
 'C29 H18'
_chemical_formula_weight          366.43

loop_
 _atom_type_symbol
 _atom_type_description
 _atom_type_scat_dispersion_real
 _atom_type_scat_dispersion_imag
 _atom_type_scat_source
 'C'  'C'   0.0181   0.0091
 'International Tables Vol C Tables 4.2.6.8 and 6.1.1.4'
 'H'  'H'   0.0000   0.0000
 'International Tables Vol C Tables 4.2.6.8 and 6.1.1.4'

_space_group_crystal_system       orthorhombic
_space_group_IT_number            19
_space_group_name_H-M_alt         'P 21 21 21'
_space_group_name_Hall            'P 2ac 2ab'

_shelx_space_group_comment
;
The symmetry employed for this shelxl refinement is uniquely defined
by the following loop, which should always be used as a source of
symmetry information in preference to the above space-group names.
They are only intended as comments.
;

loop_
 _space_group_symop_operation_xyz
 'x, y, z'
 '-x+1/2, -y, z+1/2'
 'x+1/2, -y+1/2, -z'
 '-x, y+1/2, -z+1/2'

_cell_length_a                    8.051(3)
_cell_length_b                    14.010(6)
_cell_length_c                    16.659(6)
_cell_angle_alpha                 90
_cell_angle_beta                  90
_cell_angle_gamma                 90
_cell_volume                      1879.0(13)
_cell_formula_units_Z             4
_cell_measurement_temperature     93

_cell_measurement_reflns_used     1637

_cell_measurement_theta_min       34.9

_cell_measurement_theta_max       73.3


_exptl_crystal_description        Block

_exptl_crystal_colour             Colorless

_exptl_crystal_density_meas       ?
_exptl_crystal_density_method     ?
_exptl_crystal_density_diffrn     1.295
_exptl_crystal_F_000              768
_exptl_transmission_factor_min    ?
_exptl_transmission_factor_max    ?
_exptl_crystal_size_max           0.200
_exptl_crystal_size_mid           0.200
_exptl_crystal_size_min           0.200
_exptl_absorpt_coefficient_mu     0.557
_shelx_estimated_absorpt_T_min    0.897
_shelx_estimated_absorpt_T_max    0.897
_exptl_absorpt_correction_type    Multi-scan

_exptl_absorpt_correction_T_min   0.910

_exptl_absorpt_correction_T_max   1.000

_exptl_absorpt_process_details    'Jacobson, R. (1998) Private communicatio'


_exptl_special_details
;
Rigaku CrystalClear-SM Expert 2.0 r3
;

_diffrn_ambient_temperature       93(2)
_diffrn_radiation_wavelength      1.54187
_diffrn_radiation_type            CuK\a
_diffrn_source                    'Rotating Anode'
_diffrn_measurement_device_type   'Rigaku Saturn724 CCD'

_diffrn_measurement_method        'profile data from \w-scans'

_diffrn_detector_area_resol_mean  28.5714

_diffrn_reflns_number             28093
_diffrn_reflns_av_unetI/netI      0.0268
_diffrn_reflns_av_R_equivalents   0.0515
_diffrn_reflns_limit_h_min        -10
_diffrn_reflns_limit_h_max        9
_diffrn_reflns_limit_k_min        -17
_diffrn_reflns_limit_k_max        17
_diffrn_reflns_limit_l_min        -20
_diffrn_reflns_limit_l_max        20
_diffrn_reflns_theta_min          4.123
_diffrn_reflns_theta_max          73.770
_diffrn_reflns_theta_full         67.687
_diffrn_measured_fraction_theta_max   0.991
_diffrn_measured_fraction_theta_full  1.000
_diffrn_reflns_Laue_measured_fraction_max    0.991
_diffrn_reflns_Laue_measured_fraction_full   1.000
_diffrn_reflns_point_group_measured_fraction_max   0.986
_diffrn_reflns_point_group_measured_fraction_full  1.000
_reflns_number_total              3735
_reflns_number_gt                 3595
_reflns_threshold_expression      'I > 2\s(I)'
_reflns_Friedel_coverage          0.733
_reflns_Friedel_fraction_max      0.979
_reflns_Friedel_fraction_full     0.999

_reflns_special_details
;
 Reflections were merged by SHELXL according to the crystal
 class for the calculation of statistics and refinement.

 _reflns_Friedel_fraction is defined as the number of unique
 Friedel pairs measured divided by the number that would be
 possible theoretically, ignoring centric projections and
 systematic absences.
;

_computing_data_collection
;
Rigaku CrystalClear-SM Expert 2.0 r3
;
_computing_cell_refinement
;
Rigaku CrystalClear-SM Expert 2.0 r3
;
_computing_data_reduction
;
Rigaku CrystalClear-SM Expert 2.0 r3
;
_computing_structure_solution     'SHELXL-2014/7 (Sheldrick, 2014)'

_computing_structure_refinement   'SHELXL-2014 (Sheldrick, 2014)'
_computing_molecular_graphics 'Yadokari-XG 2009 (Wakita Nemoto et al., 2009)'

_computing_publication_material
;Yadokari-XG 2009 (Wakita,Nemoto et al., 2009)
;


_refine_special_details
;
 ?
;
_refine_ls_structure_factor_coef  Fsqd
_refine_ls_matrix_type            full
_refine_ls_weighting_scheme       calc
_refine_ls_weighting_details
'w=1/[\s^2^(Fo^2^)+(0.0630P)^2^+0.1871P] where P=(Fo^2^+2Fc^2^)/3'
_atom_sites_solution_primary      ?
_atom_sites_solution_secondary    ?
_atom_sites_solution_hydrogens    geom
_refine_ls_hydrogen_treatment     constr

_refine_ls_extinction_method      none
_refine_ls_extinction_coef        .
_refine_ls_abs_structure_details
;
 Flack x determined using 1418 quotients [(I+)-(I-)]/[(I+)+(I-)]
 (Parsons, Flack and Wagner, Acta Cryst. B69 (2013) 249-259).
;
_refine_ls_abs_structure_Flack    -0.4(6)
_chemical_absolute_configuration  ?

_refine_ls_number_reflns          3735
_refine_ls_number_parameters      262
_refine_ls_number_restraints      0
_refine_ls_R_factor_all           0.0456
_refine_ls_R_factor_gt            0.0438
_refine_ls_wR_factor_ref          0.1087
_refine_ls_wR_factor_gt           0.1070
_refine_ls_goodness_of_fit_ref    1.071
_refine_ls_restrained_S_all       1.071
_refine_ls_shift/su_max           0.000
_refine_ls_shift/su_mean          0.000

loop_
 _atom_site_label
 _atom_site_type_symbol
 _atom_site_fract_x
 _atom_site_fract_y
 _atom_site_fract_z
 _atom_site_U_iso_or_equiv
 _atom_site_adp_type
 _atom_site_occupancy
 _atom_site_site_symmetry_order
 _atom_site_calc_flag
 _atom_site_refinement_flags_posn
 _atom_site_refinement_flags_adp
 _atom_site_refinement_flags_occupancy
 _atom_site_disorder_assembly
 _atom_site_disorder_group
C001 C 0.7091(3) 0.59322(17) 0.61264(13) 0.0331(5) Uani 1 1 d . . . . .
H1 H 0.7784 0.5406 0.6256 0.040 Uiso 1 1 calc R U . . .
C002 C 0.4555(3) 0.49241(17) 0.63696(13) 0.0333(5) Uani 1 1 d . . . . .
C003 C 0.4357(3) 0.66317(18) 0.59879(13) 0.0349(5) Uani 1 1 d . . . . .
C004 C 0.7658(3) 0.44767(16) 0.47664(14) 0.0341(5) Uani 1 1 d . . . . .
C005 C 0.7260(3) 0.27678(17) 0.65205(15) 0.0388(5) Uani 1 1 d . . . . .
C006 C 0.5344(3) 0.40083(17) 0.64051(13) 0.0344(5) Uani 1 1 d . . . . .
C007 C 0.6815(3) 0.75788(17) 0.57314(14) 0.0363(5) Uani 1 1 d . . . . .
H2 H 0.7314 0.8165 0.5576 0.044 Uiso 1 1 calc R U . . .
C008 C 0.5350(3) 0.58157(16) 0.61394(13) 0.0329(5) Uani 1 1 d . . . . .
C009 C 0.6015(3) 0.47425(16) 0.45633(13) 0.0344(5) Uani 1 1 d . . . . .
H3 H 0.5123 0.4542 0.4897 0.041 Uiso 1 1 calc R U . . .
C00A C 0.4613(3) 0.32978(18) 0.68837(13) 0.0388(5) Uani 1 1 d . . . . .
C00B C 0.6928(3) 0.36064(17) 0.60868(13) 0.0348(5) Uani 1 1 d . . . . .
C00C C 0.8043(3) 0.38596(17) 0.54467(14) 0.0357(5) Uani 1 1 d . . . . .
C00D C 0.2872(3) 0.49690(18) 0.66271(13) 0.0372(5) Uani 1 1 d . . . . .
C00E C 0.2600(3) 0.65949(19) 0.61368(14) 0.0381(5) Uani 1 1 d . . . . .
H4 H 0.1918 0.7121 0.5993 0.046 Uiso 1 1 calc R U . . .
C00F C 0.7803(3) 0.67947(17) 0.59300(14) 0.0355(5) Uani 1 1 d . . . . .
H5 H 0.8978 0.6857 0.5930 0.043 Uiso 1 1 calc R U . . .
C00G C 0.3018(3) 0.33851(19) 0.71997(14) 0.0425(6) Uani 1 1 d . . . . .
H6 H 0.2560 0.2895 0.7525 0.051 Uiso 1 1 calc R U . . .
C00H C 0.5676(3) 0.52867(17) 0.38918(15) 0.0395(5) Uani 1 1 d . . . . .
H7 H 0.4564 0.5462 0.3772 0.047 Uiso 1 1 calc R U . . .
C00I C 0.1915(3) 0.58181(19) 0.64790(14) 0.0404(6) Uani 1 1 d . . . . .
H8 H 0.0775 0.5831 0.6626 0.049 Uiso 1 1 calc R U . . .
C00J C 0.2122(3) 0.4196(2) 0.70309(14) 0.0416(6) Uani 1 1 d . . . . .
H9 H 0.0989 0.4236 0.7187 0.050 Uiso 1 1 calc R U . . .
C00K C 0.5116(3) 0.74982(18) 0.57622(14) 0.0374(5) Uani 1 1 d . . . . .
H10 H 0.4444 0.8033 0.5630 0.045 Uiso 1 1 calc R U . . .
C00L C 1.0607(3) 0.44173(19) 0.43629(16) 0.0436(6) Uani 1 1 d . . . . .
H11 H 1.1496 0.4668 0.4052 0.052 Uiso 1 1 calc R U . . .
C00M C 0.8944(3) 0.47533(18) 0.42335(15) 0.0384(5) Uani 1 1 d . . . . .
C00N C 0.9963(3) 0.26213(18) 0.59623(16) 0.0438(6) Uani 1 1 d . . . . .
H12 H 1.1032 0.2334 0.5959 0.053 Uiso 1 1 calc R U . . .
C00O C 0.9633(3) 0.34086(18) 0.54516(15) 0.0398(6) Uani 1 1 d . . . . .
C00P C 0.8573(3) 0.53131(18) 0.35558(16) 0.0427(6) Uani 1 1 d . . . . .
H13 H 0.9446 0.5509 0.3209 0.051 Uiso 1 1 calc R U . . .
C00Q C 0.5797(3) 0.24955(18) 0.70211(15) 0.0432(6) Uani 1 1 d . . . . .
H17 H 0.5319 0.1880 0.6842 0.052 Uiso 1 1 calc R U . . .
H18 H 0.6104 0.2446 0.7595 0.052 Uiso 1 1 calc R U . . .
C00R C 0.6972(3) 0.55810(19) 0.33869(15) 0.0438(6) Uani 1 1 d . . . . .
H14 H 0.6742 0.5964 0.2930 0.053 Uiso 1 1 calc R U . . .
C00S C 0.8757(3) 0.22713(18) 0.64594(16) 0.0431(6) Uani 1 1 d . . . . .
H15 H 0.8935 0.1702 0.6757 0.052 Uiso 1 1 calc R U . . .
C00T C 1.0911(3) 0.37426(19) 0.49284(16) 0.0444(6) Uani 1 1 d . . . . .
H16 H 1.1999 0.3487 0.4977 0.053 Uiso 1 1 calc R U . . .

loop_
 _atom_site_aniso_label
 _atom_site_aniso_U_11
 _atom_site_aniso_U_22
 _atom_site_aniso_U_33
 _atom_site_aniso_U_23
 _atom_site_aniso_U_13
 _atom_site_aniso_U_12
C001 0.0354(12) 0.0349(11) 0.0289(11) -0.0045(9) -0.0010(9) 0.0026(9)
C002 0.0351(11) 0.0405(12) 0.0243(10) -0.0030(9) -0.0031(9) -0.0009(10)
C003 0.0361(12) 0.0417(13) 0.0269(10) -0.0058(10) -0.0018(9) 0.0038(10)
C004 0.0393(12) 0.0312(11) 0.0318(11) -0.0073(9) 0.0007(10) -0.0029(10)
C005 0.0494(14) 0.0353(12) 0.0317(11) -0.0038(9) -0.0073(11) -0.0015(10)
C006 0.0384(12) 0.0387(12) 0.0262(11) -0.0026(9) -0.0020(9) -0.0061(10)
C007 0.0425(13) 0.0344(12) 0.0319(11) -0.0010(10) -0.0001(10) -0.0018(10)
C008 0.0347(11) 0.0383(12) 0.0258(10) -0.0052(9) -0.0007(9) 0.0012(10)
C009 0.0405(12) 0.0330(11) 0.0298(11) -0.0038(9) 0.0020(9) -0.0041(10)
C00A 0.0483(14) 0.0399(12) 0.0281(11) -0.0026(9) -0.0025(10) -0.0076(11)
C00B 0.0409(12) 0.0340(12) 0.0295(11) -0.0037(9) -0.0060(10) -0.0021(10)
C00C 0.0380(12) 0.0339(11) 0.0351(11) -0.0077(9) -0.0019(10) -0.0027(9)
C00D 0.0355(12) 0.0486(14) 0.0274(11) -0.0058(10) -0.0008(9) -0.0050(10)
C00E 0.0356(12) 0.0447(13) 0.0340(12) -0.0061(10) -0.0050(9) 0.0059(11)
C00F 0.0321(11) 0.0398(12) 0.0347(12) -0.0033(10) 0.0005(10) -0.0018(10)
C00G 0.0482(14) 0.0486(14) 0.0308(12) 0.0001(11) 0.0005(11) -0.0137(12)
C00H 0.0452(13) 0.0378(12) 0.0354(12) -0.0016(10) -0.0038(10) -0.0054(11)
C00I 0.0320(12) 0.0557(16) 0.0336(12) -0.0076(11) 0.0014(10) 0.0015(11)
C00J 0.0369(12) 0.0575(16) 0.0304(11) -0.0035(11) 0.0017(10) -0.0087(12)
C00K 0.0425(13) 0.0372(12) 0.0326(11) -0.0030(10) -0.0024(10) 0.0057(11)
C00L 0.0376(13) 0.0463(14) 0.0469(14) -0.0127(12) 0.0075(11) -0.0053(11)
C00M 0.0421(13) 0.0364(12) 0.0368(12) -0.0090(10) 0.0026(10) -0.0075(11)
C00N 0.0461(14) 0.0378(13) 0.0474(14) -0.0107(11) -0.0112(12) 0.0065(11)
C00O 0.0416(13) 0.0393(12) 0.0386(12) -0.0109(11) -0.0053(10) 0.0006(11)
C00P 0.0475(14) 0.0423(14) 0.0382(13) -0.0041(11) 0.0049(11) -0.0124(11)
C00Q 0.0568(16) 0.0372(12) 0.0354(12) 0.0014(10) -0.0025(11) -0.0027(13)
C00R 0.0566(15) 0.0418(13) 0.0329(12) 0.0025(11) -0.0019(12) -0.0128(12)
C00S 0.0546(15) 0.0342(13) 0.0407(13) -0.0035(10) -0.0108(12) 0.0046(11)
C00T 0.0397(13) 0.0466(14) 0.0469(14) -0.0136(12) -0.0002(11) 0.0007(12)

_geom_special_details
;
 All esds (except the esd in the dihedral angle between two l.s. planes)
 are estimated using the full covariance matrix.  The cell esds are taken
 into account individually in the estimation of esds in distances, angles
 and torsion angles; correlations between esds in cell parameters are only
 used when they are defined by crystal symmetry.  An approximate (isotropic)
 treatment of cell esds is used for estimating esds involving l.s. planes.
;

loop_
 _geom_bond_atom_site_label_1
 _geom_bond_atom_site_label_2
 _geom_bond_distance
 _geom_bond_site_symmetry_2
 _geom_bond_publ_flag
C001 C00F 1.377(3) . ?
C001 C008 1.411(3) . ?
C001 H1 0.9500 . ?
C002 C00D 1.422(3) . ?
C002 C006 1.433(3) . ?
C002 C008 1.455(3) . ?
C003 C00K 1.410(4) . ?
C003 C008 1.418(3) . ?
C003 C00E 1.438(3) . ?
C004 C009 1.416(4) . ?
C004 C00M 1.417(3) . ?
C004 C00C 1.459(3) . ?
C005 C00S 1.395(4) . ?
C005 C00B 1.405(3) . ?
C005 C00Q 1.492(4) . ?
C006 C00A 1.404(3) . ?
C006 C00B 1.492(3) . ?
C007 C00K 1.373(4) . ?
C007 C00F 1.396(4) . ?
C007 H2 0.9500 . ?
C009 C00H 1.381(3) . ?
C009 H3 0.9500 . ?
C00A C00G 1.393(4) . ?
C00A C00Q 1.492(4) . ?
C00B C00C 1.438(3) . ?
C00C C00O 1.427(4) . ?
C00D C00J 1.411(3) . ?
C00D C00I 1.439(4) . ?
C00E C00I 1.346(4) . ?
C00E H4 0.9500 . ?
C00F H5 0.9500 . ?
C00G C00J 1.375(4) . ?
C00G H6 0.9500 . ?
C00H C00R 1.402(4) . ?
C00H H7 0.9500 . ?
C00I H8 0.9500 . ?
C00J H9 0.9500 . ?
C00K H10 0.9500 . ?
C00L C00T 1.357(4) . ?
C00L C00M 1.436(4) . ?
C00L H11 0.9500 . ?
C00M C00P 1.407(4) . ?
C00N C00S 1.367(4) . ?
C00N C00O 1.418(4) . ?
C00N H12 0.9500 . ?
C00O C00T 1.427(4) . ?
C00P C00R 1.372(4) . ?
C00P H13 0.9500 . ?
C00Q H17 0.9900 . ?
C00Q H18 0.9900 . ?
C00R H14 0.9500 . ?
C00S H15 0.9500 . ?
C00T H16 0.9500 . ?

loop_
 _geom_angle_atom_site_label_1
 _geom_angle_atom_site_label_2
 _geom_angle_atom_site_label_3
 _geom_angle
 _geom_angle_site_symmetry_1
 _geom_angle_site_symmetry_3
 _geom_angle_publ_flag
C00F C001 C008 121.3(2) . . ?
C00F C001 H1 119.4 . . ?
C008 C001 H1 119.4 . . ?
C00D C002 C006 116.7(2) . . ?
C00D C002 C008 117.4(2) . . ?
C006 C002 C008 125.7(2) . . ?
C00K C003 C008 119.8(2) . . ?
C00K C003 C00E 120.2(2) . . ?
C008 C003 C00E 119.7(2) . . ?
C009 C004 C00M 117.4(2) . . ?
C009 C004 C00C 122.7(2) . . ?
C00M C004 C00C 119.6(2) . . ?
C00S C005 C00B 122.9(2) . . ?
C00S C005 C00Q 126.5(2) . . ?
C00B C005 C00Q 110.6(2) . . ?
C00A C006 C002 118.2(2) . . ?
C00A C006 C00B 107.0(2) . . ?
C002 C006 C00B 134.6(2) . . ?
C00K C007 C00F 119.6(2) . . ?
C00K C007 H2 120.2 . . ?
C00F C007 H2 120.2 . . ?
C001 C008 C003 117.6(2) . . ?
C001 C008 C002 122.7(2) . . ?
C003 C008 C002 119.4(2) . . ?
C00H C009 C004 121.6(2) . . ?
C00H C009 H3 119.2 . . ?
C004 C009 H3 119.2 . . ?
C00G C00A C006 122.6(2) . . ?
C00G C00A C00Q 126.7(2) . . ?
C006 C00A C00Q 110.7(2) . . ?
C005 C00B C00C 118.0(2) . . ?
C005 C00B C006 107.2(2) . . ?
C00C C00B C006 134.8(2) . . ?
C00O C00C C00B 116.5(2) . . ?
C00O C00C C004 117.2(2) . . ?
C00B C00C C004 126.1(2) . . ?
C00J C00D C002 121.2(2) . . ?
C00J C00D C00I 119.2(2) . . ?
C002 C00D C00I 119.7(2) . . ?
C00I C00E C003 120.3(2) . . ?
C00I C00E H4 119.8 . . ?
C003 C00E H4 119.8 . . ?
C001 C00F C007 120.6(2) . . ?
C001 C00F H5 119.7 . . ?
C007 C00F H5 119.7 . . ?
C00J C00G C00A 118.6(2) . . ?
C00J C00G H6 120.7 . . ?
C00A C00G H6 120.7 . . ?
C009 C00H C00R 120.1(2) . . ?
C009 C00H H7 120.0 . . ?
C00R C00H H7 120.0 . . ?
C00E C00I C00D 121.5(2) . . ?
C00E C00I H8 119.3 . . ?
C00D C00I H8 119.3 . . ?
C00G C00J C00D 120.5(2) . . ?
C00G C00J H9 119.8 . . ?
C00D C00J H9 119.8 . . ?
C007 C00K C003 120.8(2) . . ?
C007 C00K H10 119.6 . . ?
C003 C00K H10 119.6 . . ?
C00T C00L C00M 120.1(2) . . ?
C00T C00L H11 120.0 . . ?
C00M C00L H11 120.0 . . ?
C00P C00M C004 120.0(2) . . ?
C00P C00M C00L 120.1(2) . . ?
C004 C00M C00L 119.8(2) . . ?
C00S C00N C00O 120.6(2) . . ?
C00S C00N H12 119.7 . . ?
C00O C00N H12 119.7 . . ?
C00N C00O C00T 119.1(2) . . ?
C00N C00O C00C 121.0(2) . . ?
C00T C00O C00C 119.8(2) . . ?
C00R C00P C00M 121.1(2) . . ?
C00R C00P H13 119.5 . . ?
C00M C00P H13 119.5 . . ?
C00A C00Q C005 103.1(2) . . ?
C00A C00Q H17 111.2 . . ?
C005 C00Q H17 111.2 . . ?
C00A C00Q H18 111.2 . . ?
C005 C00Q H18 111.2 . . ?
H17 C00Q H18 109.1 . . ?
C00P C00R C00H 119.7(2) . . ?
C00P C00R H14 120.1 . . ?
C00H C00R H14 120.1 . . ?
C00N C00S C005 118.6(2) . . ?
C00N C00S H15 120.7 . . ?
C005 C00S H15 120.7 . . ?
C00L C00T C00O 121.5(2) . . ?
C00L C00T H16 119.2 . . ?
C00O C00T H16 119.2 . . ?

loop_
 _geom_torsion_atom_site_label_1
 _geom_torsion_atom_site_label_2
 _geom_torsion_atom_site_label_3
 _geom_torsion_atom_site_label_4
 _geom_torsion
 _geom_torsion_site_symmetry_1
 _geom_torsion_site_symmetry_2
 _geom_torsion_site_symmetry_3
 _geom_torsion_site_symmetry_4
 _geom_torsion_publ_flag
C00D C002 C006 C00A -17.5(3) . . . . ?
C008 C002 C006 C00A 158.7(2) . . . . ?
C00D C002 C006 C00B 168.3(2) . . . . ?
C008 C002 C006 C00B -15.6(4) . . . . ?
C00F C001 C008 C003 -3.5(3) . . . . ?
C00F C001 C008 C002 -177.9(2) . . . . ?
C00K C003 C008 C001 5.6(3) . . . . ?
C00E C003 C008 C001 -168.7(2) . . . . ?
C00K C003 C008 C002 -179.8(2) . . . . ?
C00E C003 C008 C002 5.9(3) . . . . ?
C00D C002 C008 C001 158.8(2) . . . . ?
C006 C002 C008 C001 -17.3(3) . . . . ?
C00D C002 C008 C003 -15.5(3) . . . . ?
C006 C002 C008 C003 168.4(2) . . . . ?
C00M C004 C009 C00H -2.8(3) . . . . ?
C00C C004 C009 C00H -176.6(2) . . . . ?
C002 C006 C00A C00G 12.2(3) . . . . ?
C00B C006 C00A C00G -172.1(2) . . . . ?
C002 C006 C00A C00Q -165.3(2) . . . . ?
C00B C006 C00A C00Q 10.4(3) . . . . ?
C00S C005 C00B C00C 12.0(3) . . . . ?
C00Q C005 C00B C00C -166.8(2) . . . . ?
C00S C005 C00B C006 -171.1(2) . . . . ?
C00Q C005 C00B C006 10.2(2) . . . . ?
C00A C006 C00B C005 -12.7(2) . . . . ?
C002 C006 C00B C005 162.0(2) . . . . ?
C00A C006 C00B C00C 163.5(2) . . . . ?
C002 C006 C00B C00C -21.8(4) . . . . ?
C005 C00B C00C C00O -17.8(3) . . . . ?
C006 C00B C00C C00O 166.4(2) . . . . ?
C005 C00B C00C C004 157.5(2) . . . . ?
C006 C00B C00C C004 -18.4(4) . . . . ?
C009 C004 C00C C00O 161.3(2) . . . . ?
C00M C004 C00C C00O -12.3(3) . . . . ?
C009 C004 C00C C00B -13.9(4) . . . . ?
C00M C004 C00C C00B 172.5(2) . . . . ?
C006 C002 C00D C00J 11.1(3) . . . . ?
C008 C002 C00D C00J -165.3(2) . . . . ?
C006 C002 C00D C00I -169.2(2) . . . . ?
C008 C002 C00D C00I 14.3(3) . . . . ?
C00K C003 C00E C00I -168.9(2) . . . . ?
C008 C003 C00E C00I 5.4(3) . . . . ?
C008 C001 C00F C007 -0.5(3) . . . . ?
C00K C007 C00F C001 2.5(4) . . . . ?
C006 C00A C00G C00J 0.5(4) . . . . ?
C00Q C00A C00G C00J 177.6(2) . . . . ?
C004 C009 C00H C00R 0.7(4) . . . . ?
C003 C00E C00I C00D -6.7(4) . . . . ?
C00J C00D C00I C00E 176.2(2) . . . . ?
C002 C00D C00I C00E -3.4(3) . . . . ?
C00A C00G C00J C00D -7.4(3) . . . . ?
C002 C00D C00J C00G 1.4(3) . . . . ?
C00I C00D C00J C00G -178.3(2) . . . . ?
C00F C007 C00K C003 -0.3(4) . . . . ?
C008 C003 C00K C007 -3.8(3) . . . . ?
C00E C003 C00K C007 170.5(2) . . . . ?
C009 C004 C00M C00P 3.2(3) . . . . ?
C00C C004 C00M C00P 177.2(2) . . . . ?
C009 C004 C00M C00L -173.3(2) . . . . ?
C00C C004 C00M C00L 0.6(3) . . . . ?
C00T C00L C00M C00P -168.1(2) . . . . ?
C00T C00L C00M C004 8.5(3) . . . . ?
C00S C00N C00O C00T -178.7(2) . . . . ?
C00S C00N C00O C00C 0.4(4) . . . . ?
C00B C00C C00O C00N 12.1(3) . . . . ?
C004 C00C C00O C00N -163.6(2) . . . . ?
C00B C00C C00O C00T -168.8(2) . . . . ?
C004 C00C C00O C00T 15.5(3) . . . . ?
C004 C00M C00P C00R -1.6(4) . . . . ?
C00L C00M C00P C00R 175.0(2) . . . . ?
C00G C00A C00Q C005 178.3(2) . . . . ?
C006 C00A C00Q C005 -4.3(3) . . . . ?
C00S C005 C00Q C00A 177.3(2) . . . . ?
C00B C005 C00Q C00A -3.9(3) . . . . ?
C00M C00P C00R C00H -0.6(4) . . . . ?
C009 C00H C00R C00P 1.1(4) . . . . ?
C00O C00N C00S C005 -7.1(4) . . . . ?
C00B C005 C00S C00N 0.7(4) . . . . ?
C00Q C005 C00S C00N 179.3(2) . . . . ?
C00M C00L C00T C00O -5.3(4) . . . . ?
C00N C00O C00T C00L 172.2(2) . . . . ?
C00C C00O C00T C00L -7.0(4) . . . . ?

_refine_diff_density_max    0.124
_refine_diff_density_min   -0.217
_refine_diff_density_rms    0.039

_shelxl_version_number 2014-3

_shelx_res_file
;
TITL 7026-Cu_a.res in P2(1)2(1)2(1)
REM  Yadorkari-X generated
CELL 1.54187 8.0510 14.0100 16.6590 90.0000 90.0000 90.0000
ZERR 4.0 0.0030 0.0060 0.0060 0.0000 0.0000 0.0000
LATT -1
SYMM 1/2-X, -Y, 1/2+Z
SYMM 1/2+X, 1/2-Y, -Z
SYMM -X, 1/2+Y, 1/2-Z
REM  SPGR P212121 orthorhombic
SFAC C H
UNIT 116 72
SIZE 0.20 0.20 0.20
TEMP -180.0
L.S. 10
FMAP 2
PLAN -20
ACTA
CONF
HTAB
LIST 4
BOND $H

WGHT    0.063000    0.187100
FVAR       6.31455
C001  1    0.709073    0.593222    0.612639    11.00000    0.03535    0.03489 =
         0.02893   -0.00445   -0.00103    0.00258
AFIX  43
H1    2    0.778434    0.540561    0.625562    11.00000   -1.20000
AFIX   0
C002  1    0.455451    0.492407    0.636961    11.00000    0.03509    0.04055 =
         0.02430   -0.00298   -0.00307   -0.00091
C003  1    0.435746    0.663172    0.598788    11.00000    0.03608    0.04170 =
         0.02688   -0.00580   -0.00179    0.00383
C004  1    0.765838    0.447671    0.476639    11.00000    0.03929    0.03123 =
         0.03184   -0.00728    0.00074   -0.00287
C005  1    0.725960    0.276778    0.652053    11.00000    0.04944    0.03526 =
         0.03166   -0.00384   -0.00728   -0.00152
C006  1    0.534388    0.400826    0.640512    11.00000    0.03843    0.03869 =
         0.02621   -0.00261   -0.00203   -0.00612
C007  1    0.681453    0.757876    0.573142    11.00000    0.04251    0.03440 =
         0.03194   -0.00104   -0.00010   -0.00184
AFIX  43
H2    2    0.731416    0.816457    0.557592    11.00000   -1.20000
AFIX   0
C008  1    0.535047    0.581568    0.613936    11.00000    0.03465    0.03833 =
         0.02580   -0.00521   -0.00071    0.00122
C009  1    0.601452    0.474248    0.456328    11.00000    0.04048    0.03302 =
         0.02984   -0.00380    0.00198   -0.00409
AFIX  43
H3    2    0.512346    0.454166    0.489679    11.00000   -1.20000
AFIX   0
C00A  1    0.461313    0.329781    0.688370    11.00000    0.04834    0.03993 =
         0.02807   -0.00255   -0.00252   -0.00760
C00B  1    0.692803    0.360639    0.608683    11.00000    0.04092    0.03404 =
         0.02950   -0.00368   -0.00605   -0.00208
C00C  1    0.804311    0.385958    0.544673    11.00000    0.03803    0.03388 =
         0.03514   -0.00767   -0.00188   -0.00269
C00D  1    0.287239    0.496900    0.662711    11.00000    0.03555    0.04856 =
         0.02737   -0.00584   -0.00079   -0.00498
C00E  1    0.259955    0.659493    0.613680    11.00000    0.03560    0.04466 =
         0.03398   -0.00611   -0.00496    0.00592
AFIX  43
H4    2    0.191755    0.712123    0.599306    11.00000   -1.20000
AFIX   0
C00F  1    0.780321    0.679468    0.592998    11.00000    0.03211    0.03981 =
         0.03471   -0.00334    0.00053   -0.00177
AFIX  43
H5    2    0.897822    0.685682    0.592958    11.00000   -1.20000
AFIX   0
C00G  1    0.301844    0.338507    0.719969    11.00000    0.04817    0.04858 =
         0.03076    0.00007    0.00055   -0.01365
AFIX  43
H6    2    0.255991    0.289452    0.752511    11.00000   -1.20000
AFIX   0
C00H  1    0.567599    0.528671    0.389181    11.00000    0.04524    0.03777 =
         0.03540   -0.00158   -0.00381   -0.00544
AFIX  43
H7    2    0.456351    0.546197    0.377175    11.00000   -1.20000
AFIX   0
C00I  1    0.191537    0.581815    0.647899    11.00000    0.03195    0.05571 =
         0.03362   -0.00760    0.00141    0.00154
AFIX  43
H8    2    0.077543    0.583104    0.662588    11.00000   -1.20000
AFIX   0
C00J  1    0.212177    0.419577    0.703090    11.00000    0.03693    0.05746 =
         0.03040   -0.00352    0.00170   -0.00869
AFIX  43
H9    2    0.098909    0.423566    0.718718    11.00000   -1.20000
AFIX   0
C00K  1    0.511593    0.749822    0.576221    11.00000    0.04248    0.03718 =
         0.03257   -0.00300   -0.00236    0.00574
AFIX  43
H10   2    0.444368    0.803281    0.562985    11.00000   -1.20000
AFIX   0
C00L  1    1.060696    0.441730    0.436294    11.00000    0.03763    0.04634 =
         0.04688   -0.01275    0.00753   -0.00531
AFIX  43
H11   2    1.149560    0.466758    0.405237    11.00000   -1.20000
AFIX   0
C00M  1    0.894378    0.475330    0.423351    11.00000    0.04208    0.03643 =
         0.03678   -0.00900    0.00263   -0.00750
C00N  1    0.996290    0.262125    0.596233    11.00000    0.04607    0.03776 =
         0.04743   -0.01073   -0.01117    0.00646
AFIX  43
H12   2    1.103203    0.233434    0.595897    11.00000   -1.20000
AFIX   0
C00O  1    0.963282    0.340860    0.545164    11.00000    0.04156    0.03932 =
         0.03858   -0.01093   -0.00529    0.00059
C00P  1    0.857329    0.531311    0.355577    11.00000    0.04755    0.04228 =
         0.03823   -0.00415    0.00493   -0.01241
AFIX  43
H13   2    0.944636    0.550888    0.320928    11.00000   -1.20000
AFIX   0
C00Q  1    0.579728    0.249549    0.702106    11.00000    0.05684    0.03721 =
         0.03544    0.00143   -0.00247   -0.00265
AFIX  23
H17   2    0.531876    0.188048    0.684171    11.00000   -1.20000
H18   2    0.610408    0.244560    0.759501    11.00000   -1.20000
AFIX   0
C00R  1    0.697215    0.558100    0.338694    11.00000    0.05661    0.04177 =
         0.03292    0.00245   -0.00187   -0.01278
AFIX  43
H14   2    0.674234    0.596434    0.292984    11.00000   -1.20000
AFIX   0
C00S  1    0.875695    0.227133    0.645937    11.00000    0.05456    0.03418 =
         0.04066   -0.00350   -0.01077    0.00462
AFIX  43
H15   2    0.893451    0.170199    0.675698    11.00000   -1.20000
AFIX   0
C00T  1    1.091063    0.374263    0.492844    11.00000    0.03972    0.04662 =
         0.04692   -0.01364   -0.00021    0.00075
AFIX  43
H16   2    1.199866    0.348670    0.497728    11.00000   -1.20000

AFIX   0
HKLF 4 1 1 0 0   0 1 0   0 0 1

REM  7026-Cu_a.res in P2(1)2(1)2(1)
REM R1 =  0.0438 for    3595 Fo > 4sig(Fo)  and  0.0456 for all    3735 data
REM    262 parameters refined using      0 restraints

END

WGHT      0.0625      0.1930

REM No hydrogen bonds found for HTAB generation

REM Highest difference peak  0.124,  deepest hole -0.217,  1-sigma level  0.039
Q1    1   0.2521  0.2596  0.6529  11.00000  0.05    0.12
Q2    1   0.7775  0.2429  0.5385  11.00000  0.05    0.12
Q3    1   0.7427  0.3813  0.5777  11.00000  0.05    0.11
Q4    1   1.0288  0.5123  0.3229  11.00000  0.05    0.11
Q5    1   0.6739  0.3765  0.7397  11.00000  0.05    0.11
Q6    1   1.2143  0.3654  0.3796  11.00000  0.05    0.11
Q7    1   1.2270  0.2675  0.5570  11.00000  0.05    0.11
Q8    1   0.0539  0.5214  0.7266  11.00000  0.05    0.11
Q9    1   0.4473  0.5828  0.2972  11.00000  0.05    0.11
Q10   1   0.1974  0.3587  0.6049  11.00000  0.05    0.10
Q11   1   0.0806  0.4664  0.7212  11.00000  0.05    0.10
Q12   1   0.6974  0.6603  0.4154  11.00000  0.05    0.10
Q13   1   0.7807  0.8379  0.6589  11.00000  0.05    0.10
Q14   1   0.8920  0.2024  0.5069  11.00000  0.05    0.10
Q15   1   0.3813  0.1986  0.7418  11.00000  0.05    0.10
Q16   1   0.1748  0.3754  0.6148  11.00000  0.05    0.10
Q17   1   0.7548  0.4666  0.6646  11.00000  0.05    0.10
Q18   1   0.0955  0.6392  0.5230  11.00000  0.05    0.10
Q19   1   0.1719  0.7621  0.6033  11.00000  0.05    0.10
Q20   1   0.0255  0.3375  0.6794  11.00000  0.05    0.10
;
_shelx_res_checksum   91063

_shelx_hkl_file
;
   0   0   1   30.44   37.48
   0   0   1   56.83   31.31
   0   0  -1   10.58   30.72
   0   0  -1   42.57   44.00
   0   0  -1    7.07   40.83
   0   0  -1   64.52   16.14
   0   0   1    6.77   40.52
   0   0   2154713.3 2235.57
   0   0   2154432.2 2233.15
   0   0   2159884.7 2252.15
   0   0  -2163778.6 2327.83
   0   0  -2165235.5 2380.16
   0   0  -2149062.4 2153.53
   0   0  -2158113.6 2263.96
   0   0   2152179.7 2191.42
   0   0   3 -139.58  142.15
   0   0  -3  268.29  141.67
   0   0   3  -12.86   89.95
   0   0  -3 -149.87  101.93
   0   0  -3 -170.23  130.13
   0   0  -3  199.61  114.91
   0   0  -3   43.98   45.91
   0   0   3   38.96  163.52
   0   0   41256367.37086.35
   0   0  -41186468.35015.96
   0   0   41299679.38313.45
   0   0  -41286528.37948.02
   0   0  -41124929.33211.95
   0   0  -41298199.38305.63
   0   0  -41283931.37848.18
   0   0   41206290.35595.89
   0   0   5  177.51  143.83
   0   0  -5  -14.13  158.04
   0   0   5   75.15   47.79
   0   0  -5  240.18  164.95
   0   0  -5 -138.52  160.45
   0   0  -5   58.36  112.26
   0   0  -5   28.10   90.59
   0   0   5  700.09  278.93
   0   0   6 6130.83  325.51
   0   0  -6 5628.01  337.27
   0   0   6 6328.97  261.23
   0   0  -6 6864.91  293.56
   0   0  -6 5814.92  332.73
   0   0  -6 6283.80  358.76
   0   0   6 5911.00  321.83
   0   0   7  125.23  132.93
   0   0  -7  398.98  195.51
   0   0   7   24.65   83.48
   0   0  -7  -29.63  134.99
   0   0  -7   85.70   72.73
   0   0  -7  -11.29   80.13
   0   0   7    5.53  195.44
   0   0   8 2347.88  835.67
   0   0  -8 2589.89  307.30
   0   0   8 1977.49  539.40
   0   0  -8 2613.46  230.30
   0   0  -8 2134.61  751.18
   0   0  -8 1832.66  585.96
   0   0   8 2522.47  210.82
   0   0   8 2824.58  351.74
   0   0   9   62.76  130.67
   0   0  -9  349.01  253.49
   0   0  -9 -184.02  206.55
   0   0   9  239.28  222.75
   0   0  10 1489.77  463.39
   0   0 -10  926.88  246.05
   0   0 -10  709.46  199.57
   0   0 -10 1131.39  353.51
   0   0  10  869.72  201.33
   0   0  11  140.84   81.58
   0   0 -11 -110.46  236.94
   0   0 -11    6.70  181.30
   0   0 -11   15.01   97.31
   0   0  11   -3.79  206.14
   0   0  12 4222.19 1022.24
   0   0 -12 4540.32  439.91
   0   0 -12 4257.17 1171.04
   0   0 -12 5289.88 1340.90
   0   0  12 4447.77  819.50
   0   0  13  199.37  211.76
   0   0 -13  607.33  304.78
   0   0 -13  -14.44  337.05
   0   0 -13 -215.11  245.63
   0   0  13  239.67  261.95
   0   0  13  226.51  188.44
   0   0  13   41.45   92.51
   0   0 -13  813.16  330.43
   0   0 -13  175.56  240.35
   0   0  13 -131.60  189.86
   0   0  14 1403.28  418.33
   0   0  14 1752.52  391.36
   0   0  14 1531.21  330.68
   0   0 -14 1321.64  366.67
   0   0 -14 1939.60  362.73
   0   0  14 2740.80  483.62
   0   0  15  396.95  230.70
   0   0  15   92.12  144.07
   0   0 -15   39.20  193.58
   0   0 -15  487.76  234.87
   0   0  15  185.56  212.47
   0   0  1611176.25 1808.65
   0   0  16 8529.08 1405.43
   0   0 -16 9877.01 1472.50
   0   0 -16 9816.75  700.45
   0   0  16 9554.10  601.77
   0   0  17  247.89  226.56
   0   0  17  167.15  161.87
   0   0 -17  226.98  194.76
   0   0  17  313.73  149.20
   0   0  18  172.74  199.93
   0   0  18  261.18  158.01
   0   0 -18  267.78  178.70
   0   0  18  163.65  127.11
   0   0  19    2.16  114.11
   0   0  19   -2.67  108.31
   0   0 -19  191.01  125.96
   0   0  20 4369.95 1648.58
   0   0  20 6878.05 1570.77
   0   0 -2010263.69 1721.73
   0   1   0    3.43   54.42
   0   1   0  -22.80   41.63
   0   1   0   49.91   63.94
   0   1   0  107.90   41.17
   0  -1   0   -1.73   51.41
   0  -1   0  -12.43   26.18
   0  -1   138243.97  642.69
   0   1   137925.08  620.71
   0   1   139623.01  635.45
   0   1  -138674.26  634.18
   0  -1   138396.56  607.20
   0   1   138212.71  637.41
   0   1  -137050.64  629.69
   0  -1  -139945.20  613.92
   0   1  -139196.76  606.85
   0  -1  -138049.46  620.76
   0  -1  -138814.81  638.12
   0  -1   138980.24  612.11
   0  -1  -137634.93  607.07
   0  -1   139180.75  644.18
   0  -1   2225336.0 3220.32
   0   1   2224062.8 3183.42
   0   1   2227514.1 3219.93
   0   1  -2224150.5 3198.29
   0  -1   2233154.1 3266.69
   0   1   2239416.6 3383.54
   0   1  -2220343.6 3159.75
   0   1  -2221970.3 3148.41
   0  -1  -2221611.1 3135.97
   0   1  -2229898.3 3210.15
   0  -1  -2229569.0 3278.08
   0  -1  -2226539.9 3208.46
   0  -1   2240360.3 3350.98
   0  -1   2225995.8 3227.09
   0   1   2220707.6 3127.70
   0  -1   312947.55  370.54
   0   1   312974.01  561.09
   0   1   312006.54  325.40
   0  -1   313262.89  310.34
   0   1   313160.01  343.40
   0  -1  -313986.15  276.60
   0   1  -312690.29  379.55
   0   1  -312621.43  347.17
   0  -1  -313266.75  464.74
   0   1  -312895.91  413.12
   0  -1  -313293.28  388.04
   0  -1  -313766.83  358.26
   0  -1   313457.27  309.20
   0  -1   312519.57  370.91
   0   1   313641.06  376.51
   0  -1   4141997.5 2211.73
   0   1   4144432.4 2243.28
   0   1   4141833.9 2187.53
   0   1  -4142241.0 2210.25
   0  -1   4153959.1 2328.90
   0   1   4151701.7 2273.92
   0   1  -4145247.1 2259.45
   0  -1  -4154190.5 2229.41
   0  -1  -4143767.8 2219.89
   0   1  -4146327.9 2255.56
   0   1  -4147173.0 2227.25
   0  -1  -4144344.8 2248.35
   0  -1  -4150221.3 2265.05
   0  -1   4147957.9 2179.85
   0  -1   4144543.5 2245.79
   0   1   4144854.6 2217.99
   0  -1   5554394.9 7846.71
   0   1   5522686.5 7476.12
   0   1  -5526604.7 7465.76
   0   1   5553616.6 7751.86
   0  -1  -5559253.7 7740.72
   0   1  -5568484.0 8025.21
   0  -1  -5530587.5 7533.44
   0   1  -5523855.4 7386.29
   0  -1  -5526886.9 7479.96
   0  -1  -5562148.9 7895.54
   0  -1   5562606.3 7815.54
   0  -1   5533120.3 7582.66
   0   1   5532862.3 7518.47
   0  -1   6103736.6 1821.73
   0   1   698871.84 1868.64
   0   1  -6102533.5 1796.15
   0  -1  -699423.86 1727.72
   0   1   6108064.2 1906.60
   0   1  -6103525.8 1776.39
   0   1  -6102632.5 1799.17
   0  -1  -6105050.3 1817.46
   0   1  -6107759.0 1947.18
   0  -1  -6107201.2 1865.33
   0  -1  -6104700.9 1768.74
   0  -1   6106159.9 1698.90
   0  -1   6102897.5 1804.80
   0   1   6100864.8 1744.48
   0  -1   7 6201.94  438.81
   0   1   7 6072.66  434.44
   0   1  -7 6408.29  434.56
   0  -1  -7 5903.05  366.84
   0  -1   7 6738.95  457.02
   0   1   7 6496.20  352.81
   0  -1  -7 5389.20  282.78
   0   1  -7 5787.92  347.36
   0  -1  -7 5202.31  626.82
   0   1  -7 6106.05  387.23
   0   1  -7 5766.31  627.18
   0  -1  -7 6797.56  768.47
   0  -1  -7 7251.13  382.79
   0  -1   7 6388.91  328.36
   0  -1   7 5611.40  410.59
   0   1   7 6617.09  392.18
   0  -1   821896.14  882.68
   0   1   822299.14 1635.91
   0   1  -820543.59  842.18
   0  -1  -820221.64  810.59
   0   1   824211.94  897.19
   0   1  -821674.02  831.58
   0  -1  -821280.62  871.09
   0   1  -822253.50  904.58
   0   1  -823082.75  898.55
   0  -1  -822982.69  918.62
   0  -1  -822856.63  818.82
   0  -1   821426.37  865.39
   0   1   821843.40  870.73
   0  -1   9 4171.14  946.72
   0   1   9 3687.21  309.58
   0   1  -9 4069.87  396.13
   0  -1  -9 4191.09  353.92
   0   1  -9 3473.18  286.29
   0  -1  -9 3744.11  345.68
   0   1  -9 4341.00  410.54
   0   1  -9 4269.72 1102.49
   0  -1  -9 5327.49 1242.97
   0  -1   9 4746.06  448.97
   0   1   9 3899.38  348.00
   0  -1  1023000.77 1006.47
   0   1  1022988.20 1010.22
   0   1 -1022951.26 1004.10
   0  -1 -1023486.14 1014.75
   0   1 -1023707.27 1032.33
   0  -1 -1024642.64 1064.33
   0  -1 -1023151.38 1472.09
   0   1 -1022992.12 1104.14
   0  -1  1023082.79  999.68
   0   1  1023237.47 1014.52
   0  -1  1119571.19 1504.20
   0   1  1121016.52 1050.71
   0   1 -1123074.82 1138.96
   0  -1 -1121872.86 1105.56
   0   1 -1121811.32 1076.94
   0  -1 -1121576.87 1066.68
   0   1 -1123382.36 1345.11
   0  -1 -1127070.00 1272.95
   0  -1  1122738.68 1124.19
   0   1  1122502.69 1103.43
   0  -1  12 1367.36  383.30
   0   1  12  447.54  868.93
   0   1 -12  867.40  303.96
   0  -1 -12 1190.51  273.22
   0   1 -12 1330.49  349.44
   0  -1 -12 1182.74  408.28
   0   1 -12  920.32  224.70
   0  -1 -12  845.30  311.36
   0  -1  12 1269.50  315.77
   0   1  12 1359.40  300.96
   0  -1  13 2931.83  881.97
   0   1  13 2243.05  532.03
   0   1 -13 2140.59  481.49
   0  -1 -13 1841.27  393.22
   0   1 -13 2196.74  683.10
   0  -1 -13 3279.93  818.62
   0  -1 -13 3269.57  707.38
   0  -1  13 2606.21  459.96
   0   1  13 2745.83  494.22
   0  -1  13 2497.26  384.44
   0   1  13 2572.04  418.42
   0   1  13 2191.20  481.63
   0  -1  13 2793.72  605.31
   0  -1 -13 3430.09  503.92
   0   1 -13 2381.24  408.09
   0  -1 -13 2176.72  374.26
   0  -1 -13 2668.25  660.10
   0  -1  13 1474.38  323.80
   0  -1  14 6106.41 1184.15
   0   1  14 5944.30  774.75
   0  -1  14 6795.97 1311.55
   0   1  14 7037.28 1401.61
   0   1 -14 5216.81  671.05
   0  -1 -14 4620.12  641.67
   0  -1 -14 5096.49  662.85
   0   1  14 6606.32 1293.66
   0  -1  14 6136.91  795.54
   0  -1  15 3547.88  902.78
   0   1  15 2114.50  324.17
   0  -1  15 2030.96  569.24
   0   1  15 2309.83  590.53
   0   1 -15 2665.56  405.30
   0  -1 -15 2312.70  436.49
   0  -1 -15 1801.90  298.52
   0  -1  15 3079.44  390.40
   0   1  15 3593.40  468.59
   0  -1  16 3245.47  772.59
   0   1  16 3081.34  442.88
   0  -1  16 3021.76  676.92
   0   1  16 2306.98  332.95
   0  -1 -16 3710.32  811.27
   0   1 -16 3113.37  677.05
   0  -1 -16 2892.39  528.12
   0  -1  16 2961.06  436.73
   0   1  16 2508.70  356.36
   0  -1  17 3354.50  613.15
   0   1  17 3260.96  808.72
   0  -1  17 3373.75  718.47
   0   1  17 2898.00  820.49
   0   1 -17 3091.10  373.09
   0  -1 -17 3181.17  368.43
   0  -1 -17 2817.68  324.44
   0  -1  17 3048.69  363.10
   0   1  17 3628.91  381.23
   0   1  18 4105.63  731.44
   0  -1  18 4907.00  584.02
   0  -1  18 4461.68  963.81
   0   1  18 3307.17  775.17
   0   1 -18 5242.74  844.78
   0  -1 -18 4433.14  367.76
   0  -1 -18 4762.74  418.45
   0  -1  18 4270.60  385.31
   0   1  18 3841.21  357.41
   0  -1  19 1205.02  427.45
   0   1  19 1188.31  311.69
   0  -1  19  941.74  339.30
   0   1  19  979.09  277.53
   0  -1 -19 1375.37  345.29
   0   1 -19 1542.24  250.21
   0  -1  19  886.03  211.76
   0  -1  20  160.87   91.86
   0   1 -20   47.71  100.33
   0   1 -20  491.51  186.87
   0  -1 -20  325.55  215.13
   0   2   025226.14  500.84
   0   2   023837.91  465.77
   0   2   024193.31  523.56
   0   2   024547.36  476.26
   0  -2   024966.04  417.82
   0  -2   026009.41  517.31
   0  -2   024930.71  482.05
   0   2   149467.99  842.66
   0   2   150251.12  832.56
   0   2  -148875.94  837.12
   0   2   146912.27  837.50
   0   2  -149378.34  876.85
   0   2   151493.49  800.10
   0   2  -151083.86  891.77
   0   2  -150061.33  754.36
   0  -2  -148710.02  803.57
   0  -2  -150574.33  869.24
   0  -2   150062.55  837.50
   0  -2  -149289.17  823.43
   0  -2   150836.68  862.19
   0  -2   215580.00  402.35
   0   2   215635.04  387.18
   0   2   215791.52  373.90
   0   2  -215385.31  393.65
   0  -2   214889.88  343.62
   0   2   214661.12  386.33
   0   2  -215568.61  344.53
   0  -2  -215558.90  344.09
   0  -2  -215108.29  401.66
   0  -2  -215790.72  401.73
   0  -2   215352.34  356.42
   0  -2  -215583.89  373.49
   0  -2   215684.25  402.42
   0  -2   3209538.6 3105.20
   0   2   3211156.4 3098.74
   0   2   3213748.0 3165.45
   0   2  -3213208.3 3154.06
   0  -2   3225145.4 3234.89
   0   2   3214120.1 3147.43
   0   2  -3216783.8 3237.04
   0   2  -3210029.9 3052.43
   0  -2  -3221306.8 3204.08
   0  -2  -3212983.9 3149.58
   0  -2  -3210190.0 3086.87
   0  -2   3221924.2 3178.80
   0  -2   3203867.3 3025.52
   0   2   3213041.8 3120.12
   0  -2   413850.77  429.85
   0   2   414357.51  460.54
   0   2   414706.56  437.25
   0   2  -414780.45  466.22
   0  -2   414953.15  384.56
   0   2   415253.18  437.15
   0   2  -414663.77  478.97
   0  -2  -414880.83  437.89
   0   2  -414626.64  435.44
   0   2  -415463.50  400.61
   0  -2  -413745.68  456.07
   0  -2  -414205.11  411.33
   0  -2   414684.37  366.99
   0  -2   414102.00  453.78
   0   2   413326.39  418.02
   0  -2   5  722.55  211.30
   0   2   5  551.73  178.12
   0   2   5  896.45  189.05
   0   2  -5 1091.17  214.18
   0  -2   5  765.17  184.81
   0   2   5  835.57  159.97
   0   2  -5  781.37  152.84
   0  -2  -5 1411.83  206.14
   0   2  -5  772.81  241.12
   0  -2  -5  941.78  221.34
   0  -2  -5  757.00  324.11
   0  -2   5  790.78  110.29
   0  -2   5 1113.76  229.28
   0   2   5  679.09  133.33
   0  -2   6135951.8 4232.53
   0   2   6130961.6 4063.41
   0   2   6129124.6 4002.38
   0   2  -6124754.1 3895.28
   0  -2   6143867.8 4381.93
   0   2   6143109.9 4386.12
   0   2  -6140820.8 4367.90
   0   2  -6134604.4 4261.44
   0  -2  -6133274.9 4129.27
   0   2  -6143309.4 4414.75
   0  -2  -6136849.2 4258.23
   0  -2  -6138986.7 4317.21
   0  -2   6140483.8 4264.05
   0  -2   6127466.8 3977.11
   0   2   6135353.6 4180.91
   0  -2   799386.71 3195.54
   0   2   796253.00 3078.73
   0   2   796151.97 3070.66
   0  -2   7103307.2 3247.74
   0   2   7103850.3 3257.90
   0   2  -798459.43 3162.87
   0   2  -7100423.1 3204.93
   0  -2  -793802.45 3011.01
   0   2  -7104457.8 3467.90
   0  -2  -799382.85 3205.26
   0  -2  -7100106.3 3157.23
   0  -2   795322.03 2963.78
   0  -2   796003.51 3097.87
   0   2   796563.87 3077.72
   0  -2   830360.48 1119.63
   0   2   830312.92 1087.33
   0  -2  -830846.95 1087.32
   0   2   831518.12 1064.34
   0   2  -829520.82 1067.69
   0  -2  -831007.95 1130.12
   0   2  -830178.41 1101.43
   0   2  -834365.24 1168.33
   0  -2  -830624.13 1142.17
   0  -2  -832883.00 1109.45
   0  -2   832317.30 1165.27
   0   2   829741.09 1059.61
   0   2   9  101.25  172.52
   0   2  -9  168.89  225.06
   0  -2  -9  325.72  147.01
   0   2  -9  157.67  174.07
   0   2  -9   89.22  223.58
   0  -2  -9  189.55  226.65
   0   2  -9  374.42  109.98
   0  -2  -9  309.31  266.59
   0  -2  -9  233.65  148.56
   0  -2   9  494.42  276.80
   0   2   9  438.25  181.25
   0  -2  1051925.79 1432.56
   0   2  1050378.23 1939.47
   0   2 -1050240.86 1973.64
   0  -2 -1052252.15 1416.37
   0   2 -1050614.89 1932.75
   0   2 -1051007.99 1415.59
   0  -2 -1052456.48 1463.16
   0   2 -1049596.55 1947.30
   0  -2 -1050859.20 2007.52
   0  -2  1048442.81 1922.22
   0   2  1052589.68 1417.89
   0  -2  11 4237.04  916.02
   0   2  11 3473.75  747.25
   0   2 -11 4363.21  469.33
   0  -2 -11 3773.62  398.56
   0   2 -11 3328.31  390.66
   0  -2 -11 2602.35  408.44
   0  -2 -11 3759.93  893.61
   0  -2  11 3999.76  485.87
   0   2  11 3403.05  401.82
   0  -2  12 9766.38 2454.35
   0   2  1211883.26 1198.16
   0   2 -1210662.63 1007.74
   0  -2 -1211467.22 1034.96
   0  -2 -1211056.76 1838.60
   0   2 -1212216.49 1805.11
   0  -2 -1211383.25 2203.57
   0  -2  1211797.95 1086.02
   0   2  1212822.46 1128.51
   0  -2  1323650.32 2961.56
   0   2  1317072.64 4643.66
   0   2 -1326280.37 2888.27
   0  -2 -1326553.54 2929.84
   0   2 -1325505.24 2856.22
   0  -2 -1325805.83 3070.76
   0  -2 -1326458.86 3416.00
   0  -2  1326808.19 2962.88
   0   2  1327953.35 3093.87
   0  -2  1325965.29 3402.21
   0   2  1323407.44 2532.28
   0  -2  1323135.33 2514.53
   0   2  1320978.38 3406.06
   0   2 -1318683.50 2044.56
   0  -2 -1322750.02 2462.01
   0  -2 -1322822.70 2477.46
   0  -2 -1322456.71 3353.16
   0  -2  1323904.33 2592.28
   0  -2  14  357.84  235.33
   0   2  14  588.77  212.24
   0  -2  14  922.15  262.59
   0   2  14  575.24  183.05
   0   2 -14  542.89  233.17
   0  -2 -14  573.76  221.82
   0  -2 -14  569.17  244.30
   0  -2 -14  420.98  193.94
   0  -2  14  801.17  290.51
   0  -2  15  394.43  201.80
   0   2  15  169.10  197.03
   0  -2  15  126.94  158.04
   0   2  15  134.26  126.84
   0  -2 -15  617.34  179.11
   0   2 -15  318.91  269.73
   0  -2 -15    6.38  194.64
   0  -2  15  -23.30  197.17
   0   2  15 -122.81  214.45
   0  -2  16  301.72  158.80
   0   2  16  -53.56  149.76
   0   2  16  248.69   93.91
   0   2 -16  215.54  264.54
   0  -2 -16  231.06  177.50
   0  -2 -16  359.84  213.72
   0  -2  16  217.23  166.33
   0   2  16  322.56  215.31
   0  -2  17 1312.55  499.01
   0   2  17  431.51  213.41
   0  -2  17  870.60  242.80
   0   2  17  443.34  230.39
   0  -2 -17  360.33  196.17
   0   2 -17  571.66  250.45
   0  -2 -17  806.84  313.50
   0  -2  17  608.90  222.91
   0   2  17  993.27  263.12
   0  -2  18 1294.19  321.34
   0   2  18  878.46  276.43
   0  -2  18  793.33  247.45
   0   2  18 1017.28  345.41
   0  -2 -18 1051.70  235.43
   0   2 -18  980.71  220.39
   0  -2 -18 1581.67  286.55
   0  -2  18 1433.57  271.19
   0  -2  19 3181.43  448.93
   0   2  19 1988.11  496.79
   0  -2  19 2319.47  688.87
   0   2  19 1564.24  833.65
   0  -2 -19 4201.17  422.32
   0   2 -19 2634.15  318.51
   0  -2 -19 1657.80  800.40
   0  -2  19 1935.54  583.41
   0  -2  20  504.75  176.65
   0   2 -20  814.10  249.56
   0  -2 -20  914.88  191.21
   0   2 -20  389.28  136.96
   0   3   0  181.86  166.21
   0   3   0  258.96   96.90
   0   3   0  636.14  258.16
   0   3   0  102.54  122.86
   0  -3   0  -12.10   56.78
   0  -3   0  309.90  220.49
   0  -3   0   78.08   93.59
   0   3   150014.01  925.19
   0   3  -149459.29  931.91
   0   3   150320.78  900.60
   0   3  -150680.70  931.35
   0   3   150374.47  983.71
   0   3  -149234.14  940.46
   0   3   153308.13  894.41
   0   3  -148530.39  915.10
   0  -3  -147912.95  827.71
   0  -3   152912.98  954.57
   0  -3  -150602.13  908.72
   0  -3   149146.10  909.03
   0  -3   2735346.210209.45
   0   3   2733444.910169.95
   0   3   2755144.822327.12
   0   3  -2749791.710422.60
   0   3   2735864.710256.67
   0   3  -2734344.310226.69
   0   3   2833715.324581.62
   0   3  -2721474.110049.97
   0   3  -2772041.822774.60
   0  -3  -2747059.410226.85
   0  -3  -2718093.0 9968.92
   0  -3  -2739869.410281.08
   0  -3   2749744.310360.04
   0  -3  -2746667.210354.04
   0  -3   2733458.310180.63
   0  -3   3732314.010208.87
   0   3   3740375.410303.28
   0   3   3715284.9 9945.22
   0   3  -3717133.110008.45
   0  -3   3721931.610023.68
   0   3   3723529.110118.50
   0   3   3807310.323767.23
   0   3  -3687859.2 9657.59
   0  -3  -3711728.5 9846.01
   0   3  -3772108.522810.86
   0   3  -3799703.623560.13
   0  -3  -3708367.3 9905.54
   0  -3  -3700583.0 9879.48
   0  -3   3760165.122470.93
   0  -3  -3728883.410122.97
   0  -3   3717358.810024.23
   0  -3   4205024.5 3229.98
   0   3   4207088.7 3133.23
   0   3   4205853.8 3102.50
   0   3  -4208905.8 3196.97
   0  -3   4207947.3 3154.39
   0   3   4202396.6 3108.28
   0   3  -4195332.4 3051.01
   0   3  -4209050.8 3123.92
   0  -3  -4207790.2 3098.57
   0  -3  -4212184.9 3239.85
   0  -3  -4201243.3 3118.65
   0  -3   4202913.3 3000.90
   0  -3   4207311.7 3176.24
   0   3   4212257.6 3199.15
   0   3   522758.84  633.61
   0   3   523007.32  627.47
   0   3  -523613.19  677.12
   0  -3   523912.48  575.49
   0   3   524610.77  667.72
   0   3  -523062.72  660.58
   0   3  -523712.02  617.16
   0  -3  -523230.44  614.03
   0   3  -524720.15  598.00
   0  -3  -522747.36  642.62
   0  -3  -523929.75  667.04
   0  -3   524474.66  569.70
   0  -3   523974.58  675.16
   0   3   522627.29  599.31
   0  -3   6 4793.05  338.31
   0   3   6 5314.12  376.35
   0   3   6 4839.69  327.19
   0   3  -6 4103.90  316.66
   0  -3   6 5887.74  315.38
   0   3   6 5958.83  401.92
   0   3  -6 5419.99  407.54
   0   3  -6 5111.05  811.20
   0   3  -6 5122.52  713.92
   0  -3  -6 5190.18  374.53
   0  -3  -6 5467.89  359.32
   0  -3   6 5045.81  298.27
   0  -3   6 5318.67  375.15
   0   3   6 4633.39  315.51
   0  -3   7166722.1 5245.36
   0   3   7169799.0 4663.09
   0   3   7167221.2 5180.00
   0   3  -7165154.0 5151.72
   0  -3   7176240.5 4720.72
   0   3   7170859.7 4652.33
   0   3  -7172311.6 4751.86
   0  -3  -7169227.7 4622.97
   0   3  -7160777.0 4984.14
   0   3  -7173458.9 4681.26
   0  -3  -7170529.9 4708.89
   0  -3  -7167448.6 5259.54
   0  -3   7168499.0 4512.05
   0  -3   7159270.2 4983.26
   0   3   7162282.2 5025.46
   0  -3   852152.43 1730.80
   0   3   852688.84 1697.95
   0   3   850263.34 1623.44
   0   3  -844867.76 1523.45
   0   3   852052.13 1639.33
   0   3  -848663.46 1594.19
   0  -3  -849877.25 1610.26
   0   3  -851252.26 1651.41
   0   3  -855339.34 1731.41
   0  -3  -850653.07 1668.95
   0  -3  -852213.24 1999.31
   0  -3   852639.60 1724.02
   0   3   850723.41 1627.63
   0  -3   912420.22  835.93
   0   3   912657.66  653.60
   0   3  -914408.63  736.58
   0  -3  -912522.61  655.27
   0   3  -912912.74  693.87
   0   3  -911744.54  631.12
   0  -3  -912632.41  642.41
   0  -3  -913406.41  879.34
   0  -3  -913696.84 1018.33
   0  -3   912891.24  691.47
   0   3   911844.52  649.95
   0  -3  10 6310.32 1559.19
   0   3  10 6474.20 1600.49
   0  -3 -10 6804.14  510.75
   0   3 -10 5581.54  481.15
   0   3 -10 6603.96  521.54
   0  -3 -10 6670.30  521.49
   0  -3 -10 6586.23 1869.25
   0  -3  10 7673.72  693.55
   0   3  10 7155.19  524.87
   0  -3  11 -127.65  189.41
   0   3  11  -27.83  178.80
   0   3 -11  124.80  157.90
   0  -3 -11  123.77  218.73
   0   3 -11  520.26  235.56
   0   3 -11   56.74  104.83
   0  -3 -11  379.30  192.74
   0  -3 -11  154.65  124.39
   0  -3  11  448.98  256.68
   0   3  11   40.04  223.34
   0  -3  1218652.88 1562.44
   0   3  1218510.72 2691.54
   0   3 -1216790.20 1438.13
   0  -3 -1217218.18 1449.48
   0  -3 -1218841.92 2439.28
   0   3 -1219617.04 1698.87
   0  -3 -1218396.34 1879.28
   0  -3  1217117.81 1426.44
   0   3  1216509.81 1378.31
   0  -3  1217365.38 2886.55
   0  -3  1216309.37 1617.46
   0   3 -1216075.54 1294.37
   0  -3 -1216026.60 1303.04
   0  -3  1216835.26 1362.17
   0  -3  13 1197.37  455.52
   0   3  13 1264.39  775.53
   0   3 -13 1965.95  503.19
   0  -3 -13 2600.74  482.62
   0   3 -13  915.68  458.88
   0  -3 -13 1716.03  759.00
   0  -3  13 2790.16  548.96
   0   3  13 1407.70  361.47
   0  -3  13 1971.37  503.50
   0   3  13 2161.34  413.98
   0  -3  13 2540.82  439.07
   0   3  13 1224.23  368.25
   0  -3 -13 2018.17  390.20
   0   3 -13 1926.57  385.30
   0  -3 -13 2373.97  704.82
   0  -3 -13 1561.00  465.39
   0  -3  13 1552.36  362.06
   0  -3  14   50.78  127.89
   0   3  14   73.02  208.48
   0  -3  14  102.01  171.80
   0   3  14  120.83  159.09
   0  -3 -14  274.75  219.07
   0   3 -14  149.08  214.81
   0  -3 -14  -23.17  177.97
   0  -3 -14  226.12  205.30
   0  -3  14  433.90  215.88
   0  -3  15 9261.73 1127.76
   0   3  15 8503.35  634.76
   0  -3  15 8615.55 1618.40
   0   3  15 9108.09 1225.57
   0  -3 -15 8375.32 1175.37
   0   3 -15 8164.97  795.44
   0  -3 -15 8747.47  667.38
   0  -3  15 7682.79 1520.58
   0   3  15 6970.09 1408.17
   0  -3  1610946.26  715.85
   0   3  1610193.55  542.35
   0  -3  1610556.51 1792.21
   0   3  16 9659.87 1480.95
   0   3 -1610048.76  619.35
   0  -3 -1611001.92  628.49
   0  -3 -1610779.74  681.50
   0  -3  16 9252.61  595.17
   0  -3  17  -30.28  160.06
   0   3  17 -162.63  156.98
   0  -3  17  162.22  112.61
   0   3  17  -64.02  161.22
   0  -3 -17  125.26  154.32
   0   3 -17  313.27  175.00
   0  -3 -17  373.69  185.08
   0  -3  17  -77.95  148.80
   0  -3  18 6304.85 1175.23
   0   3  18 6001.35  753.04
   0  -3  18 5186.22  867.08
   0   3  18 3937.32  955.03
   0   3 -18 6396.97  844.39
   0  -3 -18 6324.69 1442.79
   0  -3 -18 5292.10  386.09
   0  -3  18 6013.32  419.94
   0  -3  19 8386.29 1329.65
   0  -3  19 9472.12  553.93
   0  -3 -19 9509.26  426.65
   0   3 -19 8276.27 1268.62
   0  -3 -1910985.27  490.99
   0  -3  19 8506.74 1587.68
   0  -3  20  107.56   66.77
   0   3 -20   81.46  106.39
   0   3 -20  113.41  126.83
   0  -3 -20   45.93   88.68
   0   4   070204.13 1265.96
   0   4   071671.71 1260.03
   0   4   069404.00 1291.15
   0   4   071179.63 1232.21
   0  -4   070519.82 1266.11
   0  -4   072789.42 1282.05
   0   4   1  804.62  147.18
   0   4  -1  686.98  143.59
   0   4   1  723.19  212.40
   0   4  -1  629.40  140.83
   0   4   1  819.92  224.55
   0   4  -1 1204.57  265.54
   0   4   1  635.70  127.94
   0   4  -1 1010.76  223.31
   0  -4   1  659.43   85.00
   0  -4  -1  938.44  117.55
   0  -4  -1  774.83  241.45
   0  -4   1  884.78  150.44
   0  -4  -1  653.87  259.78
   0  -4   1  782.39  312.54
   0   4   2 3684.93  231.13
   0   4  -2 3313.51  227.94
   0   4   2 3885.52  272.78
   0   4  -2 3387.85  257.78
   0   4   2 3900.21  284.74
   0   4  -2 3439.64  236.45
   0   4   2 3932.55  176.70
   0   4  -2 3563.07  271.21
   0  -4  -2 3730.53  233.41
   0   4  -2 3678.08  143.99
   0  -4  -2 4081.76  219.05
   0  -4  -2 3502.25  235.39
   0  -4   2 3529.25  250.67
   0  -4  -2 3455.81  212.82
   0  -4   2 3302.78  471.09
   0  -4   313986.07  465.77
   0   4   314478.99  482.56
   0   4   313492.99  750.09
   0   4  -314265.52  486.43
   0   4   314443.78  510.69
   0   4  -312731.05  455.72
   0   4  -314119.70  497.37
   0  -4  -314206.25  364.26
   0   4  -315085.33  389.29
   0  -4  -313953.92  478.18
   0  -4  -313031.53  448.86
   0  -4   314320.65  455.70
   0  -4  -313887.72  464.07
   0  -4   314092.35  705.56
   0  -4   468413.74 1381.72
   0   4   470739.16 1349.13
   0   4   468985.69 1466.19
   0   4  -472102.22 1402.74
   0   4   466590.86 1311.14
   0   4  -470739.46 1385.79
   0   4  -470850.95 1409.10
   0  -4  -470978.25 1235.94
   0   4  -472167.11 1259.06
   0  -4  -468073.33 1298.59
   0  -4  -471556.03 1367.57
   0  -4   475297.47 1334.13
   0  -4  -469804.07 1304.89
   0  -4   468360.66 1327.49
   0  -4   5132950.4 4208.16
   0   4   5128750.6 4010.79
   0   4   5131213.7 4068.70
   0   4  -5133274.5 4169.29
   0   4   5136036.9 4244.03
   0   4  -5129638.6 4052.41
   0   4  -5130597.4 4109.52
   0   4  -5131979.7 4063.90
   0  -4  -5126429.1 3899.80
   0  -4  -5133917.9 4181.93
   0  -4  -5134999.0 4262.93
   0  -4   5141748.1 4340.89
   0  -4   5135815.4 4242.33
   0   4   5130436.8 4045.21
   0  -4   6 1876.80  416.36
   0   4   6 1670.63  444.10
   0   4   6 1865.02  597.82
   0   4  -6 1742.42  262.45
   0   4   6 1811.91  682.61
   0   4  -6 2188.69  231.38
   0   4  -6 2097.31  492.93
   0  -4  -6 1556.28  184.36
   0   4  -6 1651.80  247.22
   0  -4  -6 2130.32  299.56
   0  -4  -6 1955.88  602.54
   0  -4   6 1428.90  169.47
   0  -4   6 1505.89  251.44
   0   4   6 1762.65  208.66
   0   4   733274.20 1877.43
   0   4   727697.64 1006.77
   0   4  -729773.15 1138.19
   0   4   730485.61 1093.27
   0   4  -730502.58 1083.43
   0   4  -728347.15 1074.66
   0  -4  -728048.37 1018.64
   0   4  -727804.61 1011.81
   0  -4  -727461.81 1036.54
   0  -4  -730843.44 1123.20
   0  -4   729507.03 1103.17
   0   4   730880.43 1084.05
   0  -4   834666.78 1328.48
   0   4   831558.18 1554.82
   0   4   833628.13 1264.44
   0   4  -832781.66 1280.58
   0   4   833358.81 1225.60
   0   4  -833545.38 1280.82
   0  -4  -831865.99 1194.10
   0   4  -833012.41 1228.33
   0  -4  -835640.91 1365.22
   0  -4  -835347.24 2034.68
   0   4   833187.52 1243.24
   0  -4   9 3557.70  811.97
   0   4   9 3122.26  601.82
   0   4  -9 2779.00  321.11
   0   4   9 3950.68  461.45
   0   4  -9 2651.40  355.92
   0   4  -9 3126.71  348.57
   0  -4  -9 2472.35  323.59
   0  -4  -9 2410.23  684.53
   0  -4   9 2662.43  345.34
   0   4   9 2920.25  323.67
   0  -4  1032758.75 1635.51
   0   4  1029642.48 1320.10
   0   4 -1031271.84 1427.83
   0  -4 -1029584.35 1308.33
   0   4 -1030133.39 1342.35
   0  -4 -1029254.25 1567.58
   0   4 -1032062.82 1400.97
   0  -4 -1032898.39 1484.20
   0  -4  1031743.76 1422.26
   0   4  1033972.96 1485.43
   0  -4  11  204.64  211.23
   0   4  11  252.96  219.46
   0   4 -11  204.53  247.42
   0   4 -11   16.55  252.19
   0  -4 -11   79.07  146.58
   0   4 -11  178.74  259.35
   0  -4 -11  282.11  283.19
   0  -4  11 -260.98  272.67
   0   4  11  377.46  290.72
   0  -4  1227699.29 2668.33
   0   4  1226150.48 2846.26
   0   4 -1228309.68 2741.58
   0  -4 -1228527.47 2730.02
   0  -4 -1228925.15 2842.67
   0   4 -1228117.11 2957.10
   0  -4 -1228083.80 2728.56
   0  -4  1229674.03 3610.00
   0   4  1227430.35 2633.36
   0  -4  1224496.09 3911.55
   0   4  1223319.45 2214.29
   0  -4  1226814.04 3609.97
   0   4  1221433.52 3800.27
   0   4 -1223452.83 2213.36
   0  -4 -1222001.47 2112.66
   0  -4 -1223441.39 2235.48
   0  -4  1223525.46 2234.21
   0  -4  13 1365.65  568.89
   0   4  13 1183.15  844.62
   0  -4 -13  450.69  305.63
   0   4 -13  991.94  395.13
   0  -4 -13 1124.32  445.89
   0  -4  13 1195.59  389.92
   0  -4  13 1460.02  311.36
   0   4  13 1044.64  298.83
   0  -4  13 1912.47  406.90
   0   4  13 1076.34  439.69
   0   4 -13 1402.76  286.08
   0  -4 -13 1020.38  262.28
   0  -4 -13 2573.65  594.19
   0  -4  13 1570.52  348.74
   0  -4  1420395.84  978.17
   0   4  1422406.28 1033.03
   0  -4  1422811.88 3271.48
   0   4  1420638.84 1237.92
   0   4 -1420506.78  951.85
   0  -4 -1420901.71  985.03
   0  -4 -1420431.15  982.42
   0  -4  1420932.38 1061.56
   0  -4  15 2450.88  472.39
   0   4  15 1982.39  292.34
   0  -4  15 1932.64  357.85
   0   4  15 2335.80  501.28
   0  -4 -15 2518.20  326.85
   0   4 -15 1665.34  274.60
   0  -4 -15 1650.33  336.22
   0  -4  15 1682.55  346.33
   0  -4  16 1488.78  263.51
   0   4  16 1579.33  271.98
   0  -4  16 1483.48  327.90
   0   4  16 1147.06  370.35
   0   4 -16 1040.78  242.34
   0  -4 -16 1073.33  243.01
   0  -4 -16 1427.17  284.92
   0  -4  16 1100.77  224.51
   0  -4  17  672.83  206.38
   0   4  17 1248.90  308.56
   0  -4  17  933.85  337.97
   0  -4 -17  922.58  242.90
   0   4 -17  773.16  216.15
   0  -4 -17  967.70  271.50
   0  -4  17  931.40  193.48
   0  -4  1810846.81 1197.62
   0  -4  1810323.37 1217.42
   0  -4 -1812023.69  924.15
   0   4 -1810857.01  509.58
   0  -4 -1811402.87  900.00
   0  -4  1811317.80  883.50
   0  -4  19 3935.97  693.17
   0   4 -19 4226.09  530.45
   0   4 -19 3735.53  463.32
   0  -4 -19 4246.16  518.71
   0  -4 -19 4281.41  526.13
   0  -4  19 5477.32  664.37
   0   4 -20 1106.59  234.84
   0   5   0  260.74  174.82
   0   5   0  294.18  162.55
   0   5   0   39.24  197.99
   0   5   0  205.07  151.49
   0  -5   0   49.88   39.94
   0  -5   0 -153.39  168.77
   0  -5   0   14.57   86.49
   0   5   1  393.56  199.20
   0   5  -1  511.54  207.37
   0   5   1  158.32  215.69
   0   5  -1  107.92  165.61
   0   5   1  222.15  210.45
   0   5  -1  451.72  176.27
   0   5   1  316.29  106.55
   0   5  -1   18.34  162.42
   0  -5  -1  377.05  113.88
   0  -5  -1  167.00  120.12
   0  -5   1  208.72  160.85
   0  -5  -1  266.65  125.77
   0  -5   1   88.67  190.75
   0   5   243286.92  954.66
   0   5  -248293.14 1089.45
   0   5   244325.89 1013.07
   0   5  -246950.61 1025.44
   0   5   245116.00 1049.73
   0   5  -244272.92 1019.10
   0   5   250137.03  935.18
   0   5  -244006.21  987.83
   0  -5  -245156.49  911.14
   0  -5  -245394.84 1039.38
   0  -5   245528.03  984.32
   0  -5  -247977.55 1003.02
   0  -5   243380.95  960.73
   0   5   3 8779.14  459.58
   0   5  -3 8925.78  506.48
   0   5   3 8808.99  716.17
   0   5  -3 8460.74  449.01
   0   5   3 8089.92  493.45
   0   5  -3 8684.15  482.23
   0   5   310053.04  400.60
   0   5  -3 9341.19  505.24
   0   5  -3 9703.25  390.85
   0  -5  -3 9597.62  459.33
   0  -5  -3 7968.98  529.52
   0  -5  -3 9225.00  506.44
   0  -5   3 9175.35  469.54
   0  -5  -3 9625.70 1021.54
   0  -5   3 8846.85  470.02
   0   5   417083.49  726.99
   0   5  -416215.24  764.28
   0   5   416187.94  867.69
   0   5  -417508.90  763.32
   0   5   417576.47  771.77
   0   5  -415824.94  719.06
   0   5  -416828.71  755.42
   0   5  -418377.77  835.14
   0  -5  -417682.12  666.90
   0  -5  -417194.87  990.85
   0  -5  -417240.10  957.53
   0  -5   415797.98  670.10
   0  -5  -417201.04  731.08
   0  -5   416579.35  727.89
   0  -5   5 4093.99  329.70
   0   5   5 4684.61  340.58
   0   5   5 3742.63  930.80
   0   5  -5 4003.55  378.12
   0   5   5 4109.75  352.71
   0   5  -5 4298.25  376.79
   0   5  -5 4575.70  388.16
   0   5  -5 4546.06  566.04
   0  -5  -5 4398.29  286.30
   0  -5  -5 4624.66  330.50
   0  -5  -5 4807.81 1287.26
   0  -5   5 4300.35  308.85
   0  -5   5 4468.44 1035.34
   0   5   5 4550.18 1165.34
   0  -5   6 3273.60  834.75
   0   5   6 2326.24  243.80
   0   5   6 2758.58  270.44
   0   5  -6 2847.09  317.35
   0   5   6 2485.58  302.56
   0   5  -6 2662.48  285.91
   0   5  -6 2143.19  310.69
   0   5  -6 2890.70  703.58
   0  -5  -6 2541.74  369.78
   0  -5  -6 2624.12  738.37
   0  -5  -6 3128.04  987.41
   0  -5   6 2790.81  253.80
   0  -5   6 2961.03  323.18
   0   5   6 2585.77  289.90
   0   5   7 6030.29  460.65
   0   5   7 5929.65  416.74
   0   5  -7 6296.23  491.60
   0   5   7 6552.15  468.45
   0   5  -7 6427.67  444.34
   0   5  -7 6360.05  483.39
   0  -5  -7 6797.31  426.89
   0   5  -7 7076.35  606.76
   0  -5  -7 6787.41  489.59
   0  -5  -7 6689.54  457.05
   0  -5   7 6722.66  511.31
   0   5   7 6998.61  448.05
   0  -5   8   47.35  152.25
   0   5   8  -60.48  174.57
   0   5   8  172.01  118.61
   0   5  -8   31.54  223.76
   0   5  -8  202.82  137.78
   0  -5  -8  128.91  201.97
   0  -5  -8  147.88  182.04
   0  -5  -8  121.27  148.42
   0  -5   8  143.40  194.86
   0   5   8  299.42  203.65
   0  -5   9 1145.60  405.40
   0   5   9 1565.44  623.25
   0   5   9 1207.47  252.60
   0   5  -9 1766.77  360.81
   0   5   9 1914.46  301.53
   0   5  -9 1201.63  268.66
   0  -5  -9 1181.82  477.84
   0   5  -9 1448.05  482.24
   0  -5  -9 1443.45  478.97
   0  -5  -9  986.70  363.12
   0   5   9 1678.00  305.90
   0  -5  1013495.17 1355.02
   0   5  1013207.47 2195.47
   0   5 -1014182.19  785.87
   0  -5 -1012571.51  687.18
   0   5 -1013254.53  758.70
   0  -5 -1011289.16 2520.24
   0   5 -1011983.82 2225.52
   0  -5 -1012640.10  733.50
   0  -5  1014490.25  790.91
   0   5  1013054.54  726.02
   0  -5  11 1337.84  485.56
   0   5  11 1187.54  533.55
   0   5 -11  311.43  281.08
   0  -5 -11 1310.86  303.20
   0   5 -11 1265.64  411.79
   0  -5 -11 1702.80  590.40
   0   5 -11 1222.13  375.30
   0  -5 -11  771.88  353.38
   0  -5  11 1133.80  425.32
   0   5  11 1270.47  320.17
   0  -5  11 1304.01  308.06
   0  -5  11 1281.44  415.29
   0  -5 -11 1219.47  265.79
   0  -5  11 1819.35  356.67
   0  -5  12  292.34  210.51
   0   5  12  708.99  229.14
   0   5 -12 1047.17  398.06
   0   5 -12 1311.21  439.98
   0  -5 -12  342.64  197.45
   0   5 -12 1005.45  338.71
   0  -5 -12  607.54  407.43
   0  -5  12  998.57  327.07
   0  -5  12 1347.52  364.14
   0   5  12  932.75  237.62
   0  -5  12  757.02  223.26
   0  -5 -12  400.70  199.34
   0   5 -12  889.25  237.51
   0  -5 -12 1336.62  313.16
   0  -5  12  743.04  251.98
   0  -5  13 1177.06  321.80
   0   5  13  974.30  259.14
   0  -5  13 1497.72  312.20
   0  -5 -13 1438.41  300.12
   0   5 -13  938.67  235.07
   0  -5 -13 1563.38  286.79
   0  -5  13 1179.90  289.78
   0  -5  1415566.67 1057.84
   0   5  1415422.21  869.66
   0  -5  1414715.82 2263.32
   0  -5 -1412617.20  770.89
   0   5 -1415846.95  891.23
   0  -5 -1411532.41  792.16
   0  -5  1412026.44  780.54
   0  -5  15  278.21  216.41
   0   5  15   57.74  171.80
   0  -5  15  -54.27  193.51
   0  -5 -15   93.03  156.46
   0   5 -15  313.93  180.06
   0  -5 -15    4.14  173.95
   0  -5  15  -48.69  177.55
   0  -5  16  161.84  116.45
   0   5  16  462.22  236.34
   0  -5  16   23.22  127.88
   0  -5 -16  223.44  155.65
   0   5 -16   51.11  130.55
   0  -5 -16 -140.60  201.36
   0  -5  16  -44.36  174.67
   0  -5  1712571.12 1590.65
   0  -5  1710730.46 1807.30
   0  -5 -1711390.83  529.12
   0   5 -17 9494.23  493.86
   0  -5 -1711784.65  777.67
   0  -5  1710489.00  530.37
   0  -5  18  400.18  116.58
   0   5 -18  408.96  172.94
   0  -5 -18  253.43  122.19
   0  -5 -18  316.97  216.64
   0  -5  18  380.12  204.41
   0  -5  19  375.07  136.53
   0   5 -19  157.43  131.04
   0   5 -19  109.72  126.06
   0  -5 -19  117.38  101.89
   0  -5  19   37.63  123.80
   0   6   012757.86  617.42
   0   6   013098.33 1344.59
   0   6   011005.00  596.01
   0   6   013309.91  594.40
   0  -6   013796.25  639.90
   0  -6   013722.65  679.28
   0   6   1  923.51  176.30
   0   6  -1 1204.73  198.24
   0   6   1 1138.96  377.75
   0   6  -1 1690.16  221.03
   0   6   1 1752.46  282.91
   0   6  -1 1237.47  278.77
   0   6   1 1162.70  151.33
   0   6  -1 1426.50  258.00
   0  -6  -1  769.53  337.95
   0  -6  -1 1365.19  559.42
   0  -6   1 1004.40  202.40
   0  -6  -1  943.48  246.42
   0  -6   1  997.38  366.49
   0   6   2 2029.73  229.46
   0   6  -2 2765.38  290.36
   0   6   2 1916.38  667.85
   0   6  -2 2012.00  236.60
   0   6   2 2496.88  385.36
   0   6  -2 1794.17  249.48
   0   6   2 2615.42  203.51
   0   6  -2 1840.29  231.59
   0  -6  -2 2103.61  577.07
   0  -6  -2 2569.31  583.03
   0  -6   2 2434.22  241.61
   0  -6  -2 2375.14  798.54
   0  -6   2 2188.35  622.56
   0   6   329603.68 1123.57
   0   6  -328984.29 1143.06
   0   6   331562.38 1174.16
   0   6  -330262.55 1172.32
   0   6   329005.92 1171.08
   0   6  -331193.99 1212.28
   0   6  -327525.94 1084.81
   0  -6  -328933.90 1072.81
   0  -6  -328633.01 1281.93
   0  -6   328294.92 1077.19
   0  -6  -330332.44 1134.11
   0  -6   327353.59 1066.60
   0   6   4 3033.18  302.25
   0   6  -4 2680.05  361.28
   0   6   4 2276.13  638.42
   0   6  -4 2691.33  827.78
   0   6   4 2095.58  283.36
   0   6  -4 2225.01  307.80
   0   6  -4 2787.85  324.54
   0  -6  -4 2397.22  731.15
   0  -6  -4 2583.45  730.01
   0  -6   4 2377.49  282.17
   0  -6  -4 1968.48  643.65
   0  -6   4 2667.42  584.29
   0   6   597367.91 2823.98
   0   6  -592842.61 2774.92
   0   6   598015.02 2829.40
   0   6  -5101292.3 3030.27
   0   6   598075.95 2898.24
   0   6  -596098.01 2847.71
   0   6  -596466.41 2864.08
   0  -6  -598679.29 2876.28
   0  -6  -597853.38 2885.79
   0  -6   597266.09 2804.69
   0  -6  -5102551.1 2960.95
   0  -6   599601.78 2931.60
   0   6   6 1245.44  250.79
   0   6  -6 1776.51  324.02
   0   6   6 1954.27  502.31
   0   6  -6 1242.37  304.06
   0   6   6 1228.76  221.03
   0   6  -6 1134.09  207.84
   0   6  -6 1411.64  287.15
   0  -6  -6 1827.73  483.83
   0  -6  -6 1438.08  326.47
   0  -6   6 2058.01  250.44
   0  -6   6 1061.00  411.07
   0   6   6 1631.66  270.54
   0   6   7 7844.02 1538.16
   0   6  -7 7245.11  523.39
   0   6   7 7372.18 1613.14
   0   6  -7 8477.21  594.07
   0   6   7 7243.50  515.05
   0   6  -7 8368.55  562.13
   0   6  -7 7969.02  538.45
   0  -6  -7 8564.61  538.13
   0  -6  -7 8215.43 1718.90
   0  -6   7 8718.76  611.46
   0   6   7 8030.59  505.32
   0   6   8  262.57  141.45
   0   6   8  190.48  153.42
   0   6  -8  207.75  247.81
   0   6   8  330.42  216.19
   0   6  -8  207.09  221.65
   0  -6  -8   91.05  107.85
   0  -6  -8  212.46  291.93
   0  -6   8   81.65  141.44
   0   6   8  409.78  212.55
   0  -6   9  116.47  225.81
   0   6   9  334.66  233.22
   0   6   9  -26.85  198.29
   0   6  -9  421.64  305.85
   0   6   9  526.87  286.54
   0   6  -9  306.78  263.23
   0  -6  -9  -50.62  267.53
   0  -6  -9  -16.96  203.42
   0  -6   9  -67.54  223.60
   0   6   9  160.53  199.09
   0  -6  10 2566.23  400.80
   0   6  10 2392.32  625.66
   0   6 -10 2355.13  405.09
   0  -6 -10 2745.80  420.31
   0   6 -10 1962.31  427.33
   0  -6 -10 2452.17  662.86
   0  -6 -10 1885.24  631.77
   0   6  10 2257.84  392.03
   0  -6  11  101.06  329.39
   0   6  11  199.84  242.73
   0   6 -11  143.27  293.54
   0   6 -11  914.42  302.25
   0  -6 -11  924.15  289.81
   0  -6  11  459.09  249.22
   0  -6  11 1036.19  398.58
   0   6  11  449.69  240.98
   0  -6  11  311.09  307.10
   0  -6  11  497.32  249.57
   0  -6 -11  861.12  292.19
   0  -6  11  537.13  325.42
   0   6 -12  -14.13  309.26
   0  -6  12  202.21  226.31
   0   6  12   60.57  188.01
   0  -6  12  198.84  350.82
   0   6 -12  313.37  219.14
   0  -6 -12  302.62  200.56
   0  -6  12  331.22  355.99
   0  -6  13 1422.34  343.56
   0   6  13  899.77  292.36
   0  -6  13  942.80  242.35
   0   6 -13  740.12  270.74
   0  -6 -13  658.59  217.07
   0  -6  13 1171.97  283.55
   0  -6  1417947.38 1948.09
   0   6  1414635.56 1124.26
   0  -6  1416655.10 2715.58
   0   6 -1417452.73  784.18
   0  -6 -1415919.04  741.59
   0  -6  1414733.60  690.91
   0  -6  15  856.10  432.22
   0   6  15  488.97  243.88
   0  -6  15  195.64  191.64
   0  -6 -15  594.94  237.38
   0  -6  15  317.94  217.39
   0  -6  16  646.08  303.07
   0  -6  16  382.10  199.84
   0  -6 -16  503.90  221.80
   0  -6  16  373.53  191.84
   0  -6  17    9.78  125.71
   0   6 -17   44.75  148.99
   0  -6 -17   61.93  172.07
   0  -6  17  364.44  181.70
   0  -6  18 2739.94  510.54
   0  -6 -18 3202.15  425.59
   0  -6  18 3094.58  439.73
   0  -6  19  760.44  166.16
   0   6 -19  578.95  157.17
   0  -6 -19  321.49  201.10
   0  -6  19  967.81  207.36
   0   7   0    9.55  197.38
   0   7   0  -55.81  190.03
   0   7   0  372.32  209.42
   0   7   0  277.32  173.58
   0  -7   0  187.26  136.37
   0  -7   0  -84.83  185.64
   0   7   1  685.55  175.68
   0   7  -1 1164.14  236.29
   0   7   1  632.01  168.86
   0   7  -1  767.34  209.38
   0   7   1  997.56  311.07
   0   7  -1  919.82  306.27
   0   7   1  899.04  182.10
   0   7  -1  622.56  182.51
   0  -7  -1  443.15  173.13
   0  -7   1  797.57  194.11
   0  -7  -1  601.49  138.40
   0  -7   1 1102.50  262.29
   0   7   214590.28  666.53
   0   7  -214546.68  695.96
   0   7   215113.50  809.16
   0   7  -214955.11  703.71
   0   7   214740.19  737.06
   0   7  -214676.10  742.49
   0   7  -216133.68  722.20
   0  -7  -216387.83  653.22
   0  -7  -214678.59 1152.25
   0  -7   215200.49  697.59
   0  -7  -215282.67  671.07
   0  -7   215818.93  714.18
   0   7   355001.25 1759.97
   0   7  -354834.47 1804.49
   0   7   357847.67 1813.95
   0   7  -354906.27 1772.15
   0   7   357329.87 1887.09
   0   7  -354686.73 1794.99
   0   7  -353958.96 1754.19
   0  -7  -358079.22 1776.89
   0  -7  -355188.54 1834.88
   0  -7   356680.32 1811.01
   0  -7  -357821.76 1818.69
   0  -7   352128.56 1877.22
   0   7   4 2462.36  322.66
   0   7  -4 1692.98  283.11
   0   7   4 1488.43  437.76
   0   7  -4 1855.80  311.83
   0   7   4 2269.02  373.56
   0   7  -4 1932.69  289.07
   0   7  -4 1673.11  265.91
   0  -7  -4 1463.47  472.45
   0  -7  -4 2300.67  718.25
   0  -7   4 1874.73  381.38
   0  -7  -4 1654.75  705.68
   0  -7   4 1940.14  563.04
   0   7   5 8980.26  559.84
   0   7  -5 8203.41  565.89
   0   7   5 9026.88  824.99
   0   7  -5 7874.13  532.77
   0   7   5 8919.05  586.16
   0   7  -5 8577.45  546.06
   0   7  -5 7492.18  508.03
   0  -7  -5 8018.10  497.36
   0  -7  -5 8439.35  538.90
   0  -7   5 8938.53  531.38
   0  -7  -5 9347.48  531.56
   0  -7   5 8946.66  616.50
   0   7   6 5809.94  454.43
   0   7  -6 4499.71  448.81
   0   7   6 4459.44 1122.26
   0   7  -6 4747.50  462.25
   0   7   6 3869.09  373.08
   0   7  -6 3714.78  363.38
   0   7  -6 4988.67  425.30
   0  -7  -6 4376.08 1388.51
   0  -7  -6 5707.12 1289.56
   0  -7   6 4560.55 1038.57
   0   7   6 5308.06  399.02
   0   7   742683.21 1835.43
   0   7  -747367.21 1950.76
   0   7   746288.28 1819.81
   0   7  -743703.51 1852.14
   0   7   746067.77 1863.44
   0   7  -744585.63 1822.36
   0  -7  -744428.73 1948.14
   0  -7  -746052.92 1896.53
   0  -7   747292.74 1914.22
   0   7   742213.02 1684.14
   0   7   8 5945.02  998.87
   0   7  -8 6601.52  526.51
   0   7  -8 5972.83  500.49
   0   7   8 8703.29  604.06
   0   7  -8 6002.67  547.81
   0  -7  -8 6326.91 1703.84
   0  -7  -8 6715.66  519.38
   0  -7   8 6199.15 1332.78
   0   7   8 6173.36  478.83
   0   7   917928.43 3565.44
   0   7  -919832.85 1640.49
   0   7  -918909.28 1548.26
   0   7   919870.39 1612.61
   0   7  -919778.38 1608.58
   0  -7  -920432.89 1648.71
   0  -7  -920681.11 1756.70
   0  -7   919181.59 3753.01
   0   7   921755.10 1706.63
   0   7  10  262.87  194.97
   0   7 -10  -44.57  291.34
   0   7 -10  -66.14  310.26
   0   7 -10  324.93  267.39
   0  -7 -10   24.34  349.87
   0  -7 -10  220.95  281.24
   0  -7  10  493.85  344.23
   0  -7  10  217.32  224.21
   0  -7  10  199.93  171.88
   0  -7  10  248.91  158.55
   0  -7 -10  103.65  188.02
   0  -7  10  202.83  230.47
   0   7 -11 -111.24  326.94
   0   7 -11  642.53  409.32
   0  -7  11  336.58  311.99
   0  -7  11   19.09  160.93
   0  -7  11  696.40  330.21
   0  -7 -11  530.13  244.20
   0  -7  11  255.37  268.71
   0  -7  12  434.91  139.89
   0  -7  12  647.32  418.49
   0   7 -12  -19.47  200.98
   0  -7 -12  425.85  246.08
   0  -7  12  416.74  259.23
   0  -7  13  217.32  178.47
   0  -7  13  389.92  219.49
   0   7 -13  183.49  189.09
   0  -7 -13  887.79  242.47
   0  -7  13  328.43  122.07
   0  -7  14  -26.23  190.17
   0  -7  14  402.93  175.01
   0   7 -14  348.75  272.16
   0  -7 -14 1081.51  288.65
   0  -7  14  493.29  229.52
   0  -7  15 2701.99  609.93
   0   7 -15 2582.93  357.27
   0   7 -15 1879.62  297.42
   0  -7 -15 2470.84  305.15
   0  -7  15 2756.34  360.20
   0  -7  16 3325.35  622.27
   0   7 -16 2281.98  274.86
   0  -7 -16 2252.30  286.50
   0  -7  16 2530.67  608.22
   0  -7  17 4944.76  904.02
   0   7 -17 4588.59  431.09
   0  -7  17 3800.87  387.42
   0  -7  18  149.44   86.39
   0   7 -18   95.58  132.29
   0  -7 -18  114.72  122.31
   0  -7  18  139.19  119.98
   0   8   013216.68  694.23
   0   8   012276.23  654.52
   0   8   014063.49  782.99
   0   8   012680.14  723.13
   0  -8   014097.15  736.91
   0  -8   012596.44  648.16
   0   8   1 5805.61  436.48
   0   8  -1 5622.06  432.85
   0   8   1 6552.01  432.84
   0   8  -1 5910.60  430.65
   0   8  -1 5877.30  564.13
   0   8   1 6698.08  435.03
   0   8  -1 6860.57  471.13
   0  -8  -1 5344.03  445.85
   0  -8   1 7196.23  822.35
   0  -8  -1 5789.90  407.23
   0  -8   1 7024.56  710.51
   0   8   2 5343.49  437.18
   0   8  -2 5416.20  427.65
   0   8   2 5460.12  401.18
   0   8  -2 6633.91  518.80
   0   8   2 5675.91  475.69
   0   8  -2 6304.60  488.97
   0   8  -2 6619.60  468.74
   0  -8   2 6674.73  589.11
   0  -8  -2 5365.38  399.40
   0  -8   2 5591.03  417.59
   0   8   3 6485.03  488.41
   0   8  -3 4506.19  399.86
   0   8   3 5340.36  892.77
   0   8  -3 5608.57  450.07
   0   8   3 6111.82  520.56
   0   8  -3 5459.01  460.60
   0   8  -3 5561.51  460.90
   0  -8  -3 7361.48  583.11
   0  -8   3 5461.47 1336.31
   0  -8  -3 6199.58  478.39
   0  -8   3 5230.02 1284.77
   0   8   4 2792.06  355.12
   0   8  -4 2091.80  352.39
   0   8   4 2643.12  602.07
   0   8  -4 2843.60  320.23
   0   8   4 2776.67  412.32
   0   8  -4 2509.83  329.04
   0   8  -4 3156.44  363.74
   0  -8  -4 2170.25  711.04
   0  -8   4 2881.50  926.49
   0  -8  -4 2423.72  520.32
   0  -8   4 2768.78  741.22
   0   8   541517.97 1686.70
   0   8  -542037.56 1761.29
   0   8   541295.68 2083.78
   0   8  -538040.21 1590.94
   0   8   540813.88 1719.27
   0   8  -538016.35 1652.99
   0   8  -540089.93 1683.29
   0  -8  -541810.05 1685.13
   0  -8  -541694.32 1727.62
   0  -8   538702.13 1597.54
   0  -8  -543439.35 1762.32
   0  -8   540760.84 2127.65
   0   8   6 1333.39  291.13
   0   8  -6 1368.11  321.34
   0   8  -6 1338.51  260.37
   0   8   6 1261.77  305.04
   0   8  -6 1249.00  302.99
   0   8  -6 1939.48  365.99
   0  -8  -6  724.41  208.66
   0  -8  -6  750.21  256.78
   0  -8   6 1308.88  459.62
   0   8   6 1464.46  292.84
   0   8   7 1449.50  566.39
   0   8  -7 1410.65  286.29
   0   8  -7 2051.48  314.20
   0   8   7 1262.75  287.31
   0   8  -7 1907.27  414.87
   0  -8  -7 2044.71  629.39
   0  -8  -7 1732.26  687.06
   0  -8   7 2220.62  693.03
   0   8   7  748.11  205.54
   0   8   8  466.53  202.44
   0   8  -8 1542.74  434.42
   0   8  -8  629.39  255.38
   0   8   8  928.83  443.91
   0   8  -8  306.78  265.93
   0  -8  -8  398.05  140.07
   0  -8  -8  621.92  196.43
   0  -8   8  341.01  226.65
   0  -8   8  824.40  381.71
   0  -8   8  838.10  302.25
   0  -8   8  648.00  217.53
   0   8  -9 9027.71 1146.16
   0   8  -9 8744.54 1098.41
   0   8   9 6740.86  935.93
   0   8  -9 8526.42 1022.36
   0  -8  -9 4918.71 1245.46
   0  -8  -9 6194.81 1927.77
   0  -8   9 7226.33 1761.78
   0  -8   9 6612.42 1032.50
   0   8  -9 7254.24  820.11
   0  -8   9 7067.87 1281.53
   0  -8  -9 5767.50  701.08
   0  -8  -9 7203.20  833.97
   0  -8   9 7131.52  837.63
   0   8 -10 -137.71  380.34
   0   8 -10  804.91  369.95
   0  -8 -10  942.60  491.45
   0  -8  10  708.66  238.33
   0  -8  10  805.51  275.22
   0   8 -10  561.09  263.31
   0  -8  10  526.88  259.72
   0  -8 -10  547.87  149.03
   0  -8 -10  781.38  272.93
   0  -8  10  417.78  249.08
   0  -8  11 2399.34  704.30
   0   8 -11 2825.40  352.72
   0   8 -11 2911.36  341.79
   0  -8 -11 2710.55  346.60
   0  -8  11 2120.22  319.54
   0  -8  12  243.61  193.76
   0   8 -12  259.48  216.09
   0   8 -12  163.98  250.89
   0  -8 -12  448.42  261.99
   0  -8  12  102.54  233.01
   0  -8  13  481.29  210.63
   0   8 -13  982.54  298.49
   0   8 -13  833.64  336.28
   0  -8 -13  407.68  206.20
   0  -8  13  919.20  289.87
   0  -8  14 4069.78  836.47
   0   8 -14 3786.71  361.78
   0   8 -14 4008.72  864.47
   0  -8 -14 3951.34  370.72
   0  -8  14 3654.66  420.16
   0  -8  15 4667.72  725.90
   0   8 -15 2961.43  385.34
   0   8 -15 2406.28  776.78
   0  -8 -15 2862.60  550.14
   0  -8  15 2938.82  318.77
   0  -8  16  573.83  234.06
   0   8 -16  302.64  136.49
   0  -8 -16  120.01  187.09
   0  -8  16  377.40  166.84
   0  -8  17  899.31  154.16
   0   8 -17  843.40  213.56
   0  -8 -17  662.67  178.12
   0  -8  17  960.00  195.76
   0  -8  18  256.88  173.29
   0   8 -18  312.54  172.52
   0  -8 -18  126.46   67.87
   0  -8  18  285.26  142.07
   0   9   0  139.70  219.54
   0   9   0  230.21  146.22
   0   9   0  462.64  279.95
   0   9   0  -21.20  178.28
   0  -9   0   -3.57  171.56
   0   9   137015.83 1550.43
   0   9  -140956.07 1688.73
   0   9   139387.59 1592.81
   0   9  -139562.26 1647.80
   0   9  -138845.73 1686.10
   0   9  -142766.56 1728.92
   0  -9   140950.46 1701.73
   0  -9  -138705.22 1744.62
   0  -9  -137800.42 1732.53
   0  -9   138421.43 1655.17
   0   9   2 4818.48  442.52
   0   9  -2 4461.27  436.53
   0   9   2 4635.61 1321.76
   0   9  -2 4076.90  807.87
   0   9   2 4432.70  448.86
   0   9  -2 5300.80  537.41
   0   9  -2 3908.00  814.53
   0  -9  -2 4624.69 1398.54
   0  -9   2 4668.83  937.04
   0  -9  -2 4198.74 1103.11
   0  -9   2 3675.59 1418.54
   0   9   3  840.86  349.35
   0   9  -3  233.82  204.17
   0   9  -3  339.24  219.21
   0   9   3  391.10  211.24
   0   9  -3  164.04  225.85
   0  -9   3  297.42  231.67
   0  -9  -3  568.35  164.38
   0  -9   3  438.16  158.67
   0   9   4  351.70  235.20
   0   9  -4  143.98  176.85
   0   9  -4  441.32  247.10
   0   9   4  939.42  328.95
   0   9  -4  734.15  265.13
   0   9  -4  447.48  221.07
   0  -9  -4  619.66  395.63
   0  -9   4  186.89  133.43
   0  -9  -4  549.48  239.23
   0  -9   4  361.06   80.03
   0   9   5  553.60  257.01
   0   9  -5 1074.85  328.96
   0   9  -5  618.58  310.07
   0   9   5  766.62  258.05
   0   9  -5  766.55  261.57
   0   9  -5  608.21  208.84
   0  -9  -5 1151.47  477.58
   0  -9  -5  450.12  296.16
   0  -9   5 1125.00  303.71
   0   9   6 2929.85  448.90
   0   9  -6 2523.28  433.35
   0   9  -6 1738.38  344.18
   0   9   6 2985.99  495.45
   0   9  -6 2719.90  430.44
   0   9  -6 2539.10  450.49
   0  -9  -6 2421.65  601.87
   0  -9   6 2543.47  969.90
   0   9   6 2486.46  379.57
   0   9   7  165.73  204.66
   0   9  -7  487.80  334.17
   0   9  -7  567.46  336.43
   0   9   7  378.10  265.50
   0   9  -7  270.48  293.89
   0  -9   7  217.66  214.75
   0  -9   7  458.60  199.61
   0   9  -7  157.82  203.73
   0  -9  -7  548.05  308.95
   0  -9   7  693.97  274.13
   0  -9  -7  137.76  210.30
   0  -9   7  203.23   94.76
   0   9  -844635.38 4789.55
   0   9  -850008.45 5312.64
   0   9   850200.93 5341.05
   0   9  -854831.64 5806.05
   0  -9  -849985.13 5324.59
   0  -9   846503.89 4951.47
   0  -9   840758.49 4327.17
   0   9  -842211.02 4424.43
   0   9   841676.62 4379.93
   0  -9   840234.84 4224.81
   0  -9  -842248.02 4439.82
   0  -9   842153.07 4433.34
   0  -9   9 2798.18  615.14
   0   9  -9 3204.07  488.71
   0   9   9 3304.64  519.60
   0   9  -9 2990.81  472.99
   0  -9  -9 3557.37  534.68
   0  -9  -9 3282.35  514.39
   0  -9   9 3001.58  460.61
   0  -9  10 -113.52  278.60
   0   9 -10  687.04  295.10
   0   9 -10  304.06  266.57
   0  -9 -10  384.96  231.65
   0  -9 -10  369.35  310.70
   0  -9  10   50.55  116.80
   0  -9  11  128.34  130.23
   0   9 -11  242.98  207.56
   0   9 -11  283.78  309.37
   0  -9 -11   90.00  204.53
   0  -9 -11   36.79  135.96
   0  -9  11  -41.90  198.10
   0  -9  12 7112.33 1500.31
   0   9 -12 6627.70  473.31
   0   9 -12 6962.24  495.59
   0  -9 -12 6115.05  522.03
   0  -9  12 8317.47  544.90
   0  -9  13 2806.53  676.69
   0   9 -13 3205.45  351.52
   0   9 -13 2585.85  319.52
   0  -9 -13 2855.81  482.93
   0  -9  13 1784.58  522.96
   0   9 -14  937.13  212.16
   0   9 -14 1279.03  246.65
   0  -9 -14 1053.20  195.09
   0  -9  14 1066.41  307.15
   0  -9  15 5149.00  953.58
   0   9 -15 5303.48  378.94
   0   9 -15 4718.31  578.41
   0  -9 -15 5104.14  393.16
   0  -9  16  233.53  127.41
   0   9 -16  226.66  147.63
   0   9 -16  373.35  166.02
   0  -9 -16  346.45  164.90
   0  -9  16  109.41  162.38
   0  -9  17 -107.22  115.97
   0   9 -17  133.10  114.06
   0  -9 -17  213.03  125.85
   0  -9  17  189.85  121.23
   0  10   051548.20 3696.35
   0  10   045710.64 1544.93
   0 -10   047981.58 1554.65
   0 -10   051044.01 3801.48
   0  10   1 7438.43  570.21
   0  10  -1 9154.67  636.41
   0  10  -1 8597.58 1491.01
   0  10   1 8309.36  665.76
   0  10  -1 9260.19  726.43
   0 -10  -1 8670.34 2322.40
   0 -10   1 9098.62 1960.20
   0 -10  -1 9135.32  605.25
   0 -10   1 7054.11 1697.31
   0  10   2 8201.43  606.25
   0  10  -2 6810.61  583.82
   0  10  -2 7794.71 1362.85
   0  10   2 6238.16  546.79
   0  10  -2 7713.79  658.60
   0  10  -2 7701.44  672.75
   0 -10  -2 8120.94 1800.07
   0 -10   2 7657.06 1160.06
   0 -10  -2 6067.87 1865.76
   0 -10   2 6765.78 1813.32
   0  10   355713.56 5040.39
   0  10  -353307.13 3832.95
   0  10  -355760.56 5105.77
   0  10   356735.09 5170.93
   0  10  -355554.43 5061.70
   0  10  -352780.06 3790.99
   0 -10   354922.91 3937.98
   0 -10  -357242.87 5171.18
   0 -10   353662.94 3836.04
   0  10   4 2845.39  497.14
   0  10  -4 2127.82  387.38
   0  10  -4 2259.80  648.21
   0  10   4 2107.45  421.26
   0  10  -4 3913.00  566.78
   0  10  -4 3378.64  573.51
   0 -10  -4 3263.72  583.29
   0 -10   4 2615.22  531.58
   0 -10  -4 1189.59  903.34
   0 -10   4 3166.09 1205.85
   0 -10   4 2108.05  499.85
   0 -10  -4 3032.67  695.57
   0 -10  -4 3408.42  509.61
   0 -10   4 2423.11  367.21
   0  10   516247.69 1642.51
   0  10  -515829.87 1631.49
   0  10  -516228.93 1692.72
   0  10   515785.61 1682.77
   0  10  -515415.22 1640.04
   0  10  -517943.81 1832.40
   0 -10  -516647.58 1717.83
   0 -10   516327.26 1804.45
   0 -10   514546.07 1532.99
   0  10  -516439.45 1628.81
   0 -10  -515203.99 2864.74
   0  10  -514617.22 1454.58
   0 -10  -512721.39 1288.78
   0 -10   512941.61 1324.68
   0  10  -610581.48 1369.38
   0  10  -610107.91 1304.71
   0  10   610350.66 1360.93
   0  10  -610569.67 1406.64
   0 -10  -610804.43 2469.54
   0 -10   6 8809.03 2662.21
   0 -10   610003.06 2226.25
   0  10  -610484.46 1228.52
   0 -10  -610756.44 2115.78
   0  10  -6 8685.87 1048.19
   0 -10  -6 9320.62 1110.93
   0 -10   6 8733.19 1054.67
   0  10  -739873.45 4186.52
   0  10  -739604.37 4136.79
   0  10   742424.15 4431.12
   0  10  -744185.39 4603.88
   0 -10  -742856.34 4460.19
   0 -10   741972.10 4353.91
   0 -10   737010.12 3772.51
   0  10  -735687.87 3661.88
   0  10  -734348.13 3508.05
   0 -10  -732766.47 3358.46
   0 -10   734711.21 3567.93
   0 -10   8 7198.42 1485.99
   0  10  -8 7399.84  599.75
   0  10   8 6291.73  583.35
   0  10  -8 8413.75  609.67
   0 -10  -8 6253.73  563.13
   0 -10   8 6907.26  564.86
   0 -10   9 1653.72  450.89
   0  10  -9  680.01  306.70
   0  10   9  989.67  244.01
   0  10  -9 1578.13  379.17
   0 -10  -9  924.38  250.31
   0 -10   9 1527.25  382.77
   0 -10  10 8453.16 1566.46
   0  10 -10 6696.90  520.73
   0  10  10 7120.16  555.59
   0  10 -10 7527.62  599.21
   0 -10 -10 7591.89  609.42
   0 -10 -10 7272.18  591.45
   0 -10  10 8551.57  642.12
   0 -10  11  531.59  211.17
   0  10 -11  384.81  251.58
   0  10 -11  180.96  215.14
   0 -10 -11  331.39  221.69
   0 -10 -11  891.69  249.14
   0 -10  11  562.03  222.10
   0 -10  12  618.23  197.80
   0  10 -12  460.10  257.29
   0  10 -12  702.07  219.42
   0 -10 -12  525.21  232.33
   0 -10 -12  776.02  275.19
   0 -10  12  487.88  335.52
   0 -10  13 2937.56  819.58
   0  10 -13 3419.30  410.32
   0  10 -13 3473.10  460.90
   0 -10 -13 3686.01  410.06
   0 -10  13 1961.05  298.41
   0 -10  14  378.47  117.83
   0  10 -14  172.05  139.94
   0  10 -14  192.61  140.15
   0 -10 -14  333.89  159.41
   0 -10  14   14.63  152.85
   0 -10  15  335.64  186.33
   0  10 -15  224.61  154.12
   0  10 -15  283.72  162.73
   0 -10 -15  229.55  145.99
   0 -10  15  292.57  140.47
   0  10 -16  160.54   92.27
   0  10 -16   52.98  115.54
   0 -10 -16  267.70  138.88
   0  11   0  136.55  319.38
   0  11   0  389.67  328.06
   0 -11   0  361.74  271.86
   0 -11   0  177.86  241.51
   0 -11   0  146.52  271.50
   0 -11   0  257.07  134.68
   0 -11   0  211.88  113.99
   0 -11   0  808.03  343.02
   0  11   112724.86 1383.41
   0  11  -114466.98 1521.15
   0  11  -113421.21 1512.77
   0  11   113368.72 1448.89
   0 -11  -113166.74 2281.12
   0 -11   110048.77 3437.18
   0 -11  -113270.50 1402.55
   0 -11   115171.86 1626.05
   0 -11  -111886.02 2240.98
   0 -11   110369.57 1970.06
   0 -11  -113402.76 2511.52
   0 -11   112273.65 1262.26
   0 -11  -110822.81 1137.93
   0 -11   110740.06 1118.41
   0 -11  -112040.26 1289.68
   0 -11   113031.83 1320.61
   0  11   277260.92 7772.31
   0  11  -273952.72 7459.32
   0  11   271267.97 7220.70
   0  11  -267942.42 6880.70
   0 -11   267784.92 6840.88
   0 -11  -269793.48 7038.97
   0 -11   275760.15 7622.10
   0 -11  -259605.91 6188.55
   0 -11  -259594.96 6177.66
   0 -11   259257.91 6137.04
   0 -11  -255001.82 5726.03
   0 -11   257950.78 6038.18
   0 -11   262099.35 6437.60
   0  11  -3 1347.21  424.25
   0  11   3 1017.68  418.46
   0  11  -3  950.75  444.07
   0  11  -3 1193.69  503.48
   0 -11  -3 1699.62  392.65
   0 -11   3  664.81  646.22
   0 -11   3  367.10  199.62
   0 -11   3  506.45  365.90
   0 -11  -3 1563.30  347.73
   0 -11   3  595.77  301.87
   0  11  -3  687.65  251.91
   0 -11  -3  911.99  338.27
   0 -11   3  873.37  418.68
   0 -11   3  513.49  251.15
   0  11  -4  681.21  308.55
   0  11   4  441.89  359.53
   0  11  -4 -126.89  400.84
   0  11  -4  574.47  414.48
   0 -11  -4 1907.48  538.17
   0 -11   4  180.50  302.84
   0 -11   4  331.94  454.74
   0 -11  -4  273.70  145.33
   0 -11   4  230.22  235.30
   0  11  -4  254.00  214.46
   0 -11  -4  677.92  324.17
   0 -11   4  332.89  178.68
   0 -11   518353.24 2117.66
   0  11  -517743.37 1895.40
   0 -11  -517047.14 1952.25
   0 -11   516476.54 2817.98
   0  11  -518381.30 2111.99
   0 -11  -516533.18 1787.19
   0 -11   518196.76 1951.55
   0 -11   6 1332.48  402.70
   0  11  -6 1309.38  274.16
   0 -11  -6 1004.15  209.08
   0  11  -6 1054.03  257.84
   0 -11  -6 1254.89  276.23
   0 -11   6 1226.71  308.59
   0 -11   7 1672.50  322.31
   0  11  -7 1798.09  272.65
   0  11   7 2921.96  472.25
   0  11  -7 2543.00  508.85
   0 -11  -7 2133.12  352.36
   0 -11   7 2831.82  481.94
   0 -11   8 2689.70 1107.63
   0  11  -8 3003.41  358.93
   0  11   8 2703.68  420.13
   0  11  -8 2341.31  361.16
   0 -11  -8 2033.70  365.66
   0 -11   8 3230.41  375.58
   0 -11   9 5767.74 1185.81
   0  11  -9 5650.60  471.23
   0  11   9 4185.32  422.02
   0  11  -9 5098.11  410.37
   0 -11  -9 6192.68  476.77
   0 -11   9 5272.03  429.28
   0 -11  10 1391.13  325.63
   0  11 -10 1210.57  261.48
   0  11  10  825.33  245.31
   0  11 -10 1910.28  381.66
   0 -11 -10 1772.19  336.19
   0 -11  10 1283.48  288.13
   0 -11  11  -38.82  190.23
   0  11 -11  133.57  191.68
   0  11 -11  234.66   92.58
   0 -11 -11  154.74  162.42
   0 -11  11  320.15  213.08
   0 -11  12  343.53  138.13
   0  11 -12  449.59  183.44
   0  11 -12  158.39  113.33
   0 -11 -12  220.16  149.22
   0 -11 -12  143.88  151.15
   0 -11  12  210.89  193.53
   0 -11  13 7320.62 1531.72
   0  11 -13 5427.17  385.04
   0  11 -13 5609.83  429.78
   0 -11 -13 4260.38  338.79
   0 -11  13 5733.46 1226.10
   0 -11  14   65.94  103.53
   0  11 -14  124.39  127.20
   0  11 -14   -0.67  131.11
   0 -11 -14  115.86  127.49
   0 -11  14   73.88  170.54
   0 -11  15  421.48  179.22
   0  11 -15  239.72  113.77
   0  11 -15  149.65   98.64
   0 -11 -15  101.17  161.23
   0 -11  15  359.69  169.29
   0 -11  16 1175.43  740.92
   0 -11  16 1986.99  383.63
   0 -12   039938.89 1493.23
   0 -12   040890.05 1625.81
   0 -12   037644.39 1463.58
   0 -12   040445.26 1507.91
   0 -12  -1  202.50  157.12
   0 -12   1  -30.03  230.29
   0 -12  -1  318.21  245.79
   0 -12   1  297.64  127.78
   0 -12  -1  254.45  233.50
   0 -12   1  387.59  230.68
   0 -12  -1  203.98  177.95
   0 -12   1  404.20  284.00
   0 -12   2 9316.59 1773.44
   0  12   2 8183.03  580.51
   0 -12  -2 9670.79 1634.30
   0 -12   2 9951.40 1601.73
   0 -12  -2 9853.70 1890.39
   0 -12   2 8307.30  601.57
   0 -12   210218.07  676.55
   0 -12   3  446.74  339.15
   0 -12  -3 1085.40  223.99
   0 -12   3  874.53  263.35
   0 -12  -3 1697.91  363.21
   0 -12   3  719.30  376.30
   0 -12   3 1226.80  296.29
   0 -12  -415005.25  776.93
   0 -12   415453.52  784.13
   0  12  -416110.25 1097.44
   0 -12  -413939.75  794.77
   0 -12   415343.65  859.70
   0 -12   5 5229.68 1132.35
   0 -12  -5 5213.82 1098.05
   0 -12   5 4193.46  964.22
   0  12  -5 4685.67  458.65
   0 -12  -5 3990.69  421.14
   0 -12   5 4718.85  474.06
   0 -12   6 6388.59 1639.97
   0  12  -6 5964.42  491.83
   0  12   6 5796.03  553.99
   0  12  -6 6169.06  524.16
   0 -12  -6 6638.13  577.38
   0 -12   6 5169.70  484.03
   0 -12   7  260.48  288.90
   0  12  -7  685.16  226.32
   0  12   7  957.82  264.12
   0  12  -7 1519.99  351.32
   0 -12  -7  408.18  212.81
   0 -12   7  757.43  298.12
   0 -12   8 1560.65  403.67
   0  12  -8 1175.28  244.61
   0  12   8 1247.93  336.22
   0  12  -8 1436.32  287.89
   0 -12  -8 1369.24  278.26
   0 -12   8 1945.13  402.23
   0 -12   910695.37 2032.93
   0  12  -910218.33  546.05
   0  12   9 9871.95  585.92
   0  12  -911871.05 1995.15
   0 -12  -9 8708.54  541.55
   0 -12   9 9826.48  565.32
   0 -12  10 9095.38 1698.60
   0  12 -10 7816.37  461.15
   0  12  10 7690.25  498.89
   0  12 -10 9069.83 1034.19
   0 -12 -10 6200.75  464.67
   0 -12  10 7225.64  483.50
   0 -12  11  427.11  186.66
   0  12 -11  414.29  176.26
   0 -12 -11  566.35  211.52
   0 -12  11   65.12  178.22
   0 -12  12 1310.05  251.95
   0  12 -12 1107.79  204.46
   0 -12 -12 1193.77  328.40
   0 -12  12 1408.84  266.14
   0 -12  13 4070.16 1056.97
   0  12 -13 3913.45  519.73
   0  12 -13 3744.26  497.14
   0 -12  13 4289.33  558.17
   0 -12  14  191.72  110.36
   0  12 -14   49.81  100.19
   0  12 -14  362.69  173.86
   0 -12  14   67.33  114.25
   0 -12  15  262.51  142.17
   0 -13   0  -84.65  163.79
   0 -13   0  304.11  158.44
   0 -13   0  317.79  214.81
   0 -13   0  140.92  120.56
   0 -13   1 7023.50  645.77
   0  13   1 8295.75  579.58
   0 -13   1 8439.73 1288.12
   0 -13  -110201.33 1745.71
   0 -13   1 8230.85 1196.77
   0 -13  -1 9529.94  693.25
   0 -13   1 9210.32 1074.45
   0 -13   231097.73 1759.90
   0 -13  -232476.77 1998.78
   0 -13   231392.20 1542.35
   0 -13   230060.08 1390.71
   0 -13  -229861.49 1381.18
   0 -13   232760.23 1442.15
   0 -13   3 3085.80  699.30
   0 -13  -3 3224.28  674.44
   0 -13   3 3083.03  553.81
   0 -13  -3 2797.30  362.48
   0 -13   3 3173.47  377.12
   0 -13   3 3534.81  413.34
   0 -13   4  722.68  294.02
   0 -13  -4  898.14  316.43
   0 -13   4  784.42  335.72
   0  13  -4  709.18  189.39
   0 -13  -4  472.32  353.73
   0 -13   4  652.19  276.23
   0 -13   520588.11  816.48
   0 -13   520139.10  758.65
   0  13  -522870.46  814.44
   0 -13  -521300.29  817.56
   0 -13   522908.10  847.26
   0 -13   6 1739.59  666.37
   0  13   6 2531.59  343.83
   0  13  -6 2126.62  367.76
   0 -13  -6 1986.80  361.61
   0 -13   6 2256.87  381.84
   0 -13   7  273.12  253.46
   0  13   7  650.71  201.36
   0  13  -7  849.19  240.66
   0 -13  -7  463.00  261.40
   0 -13   7  727.83  213.03
   0 -13   8  265.54  142.34
   0  13  -8  344.05  220.42
   0  13   8 -107.25  187.06
   0  13  -8  483.38  250.32
   0 -13  -8  117.48  194.06
   0 -13   8  641.27  242.18
   0 -13   9 7869.74 1723.99
   0  13  -9 7007.76  450.67
   0  13   9 6749.26  425.74
   0  13  -9 7784.12 1100.80
   0 -13  -9 7268.15  457.61
   0 -13   9 6155.22  428.84
   0 -13  10 4353.22  861.89
   0  13 -10 3566.87  301.76
   0  13  10 5109.89  407.39
   0  13 -10 4711.88  388.33
   0 -13 -10 6204.85  438.30
   0 -13  10 5249.58  385.13
   0 -13  11 3334.81  994.05
   0  13 -11 3248.74  364.32
   0  13 -11 3356.46  352.49
   0 -13 -11 2082.93  647.45
   0 -13  11 3303.41  378.80
   0  13 -12 1492.61  264.83
   0  13 -12 2211.65  331.17
   0 -13 -12 1409.28  427.00
   0 -13  13   -0.02   57.19
   0 -13  13  682.69  202.43
   0  14   0 8373.96  528.08
   0 -14   0 8458.46 1425.81
   0 -14   0 8261.60  563.51
   0 -14  -1  190.93  200.47
   0 -14   1  141.61  117.03
   0 -14  -1  130.72  191.19
   0 -14   1  147.93  218.99
   0 -14   1  138.35  187.67
   0 -14   2 2770.69  547.85
   0 -14  -2 3520.03  677.18
   0 -14   2 3455.08  462.72
   0 -14  -2 4295.79  627.01
   0 -14   2 3024.99  382.47
   0 -14   2 2708.76  747.86
   0 -14   3 2229.99  455.72
   0 -14  -3 2184.49  405.18
   0 -14   3 2015.27  443.34
   0 -14  -3 1928.58  357.53
   0 -14   3 2155.76  313.45
   0 -14   3 1896.24  275.56
   0 -14   4  402.98  157.33
   0 -14   4  347.35  120.36
   0  14   4  659.63  329.53
   0 -14  -4  103.64  226.13
   0 -14   4  255.87  164.47
   0 -14   5 1874.64  480.24
   0 -14   5 1540.80  646.53
   0  14   5 1738.60  354.89
   0  14  -5 2561.46  383.02
   0 -14  -5 2060.95  354.93
   0 -14   5 1970.59  314.40
   0 -14   6 9305.36 1641.88
   0  14   6 7056.00  448.95
   0  14  -6 9764.27  526.28
   0 -14  -6 8800.13  561.96
   0 -14   6 8864.05  505.81
   0 -14   7 4253.87  972.19
   0  14   7 4976.22  415.88
   0  14  -7 4738.07  388.32
   0 -14  -7 5496.87  445.29
   0 -14   7 5640.86  470.94
   0 -14   8 4991.28 1171.25
   0  14   8 5363.81  443.57
   0  14  -8 5327.17  357.06
   0 -14  -8 5930.65  585.98
   0 -14   8 5095.05  412.42
   0 -14   9  259.45  127.18
   0  14   9  664.31  234.10
   0  14  -9  113.53  123.09
   0 -14  -9  -15.87  129.73
   0 -14   9  326.46  169.91
   0 -14  10 1031.51  412.64
   0  14  10 1197.33  243.51
   0  14 -10 2226.43  343.13
   0 -14 -10 1123.10  421.45
   0 -14  10 1556.22  299.02
   0 -14  11  161.75  100.35
   0  14 -11  129.78  138.68
   0 -14 -11  -29.85  114.80
   0 -14  11   41.93   98.10
   0  14 -12   51.28   97.48
   0 -14  12  296.65  153.78
   0 -15   0   -9.37  166.92
   0 -15   0  141.60  176.89
   0 -15   1   85.42  100.46
   0 -15  -1  167.04  111.68
   0 -15   1  108.41  155.52
   0  15  -2  -72.48  149.65
   0 -15   2  287.33  174.84
   0  15   2  451.03  213.73
   0 -15   2  202.94  141.74
   0 -15  -2 -158.91  171.04
   0 -15   2  260.78  113.84
   0  15  -3  718.36  216.96
   0 -15   3  361.19  126.79
   0  15   3  779.43  326.99
   0 -15  -3 1062.82  316.23
   0 -15   3  472.28  271.14
   0 -15   4  166.34   78.15
   0 -15   4   63.74   61.24
   0  15   4   99.94  186.44
   0 -15  -4  110.45  185.41
   0 -15   4  146.44   59.08
   0 -15   5  357.36  185.95
   0  15   5  434.47  107.35
   0 -15   5  442.77  143.59
   0 -15   6  309.42  109.43
   0  15   6  594.46  178.44
   0  15  -6  701.16  216.92
   0 -15  -6  517.93  210.08
   0 -15   6  442.51  188.35
   0 -15   7  698.20  460.88
   0  15   7 1504.23  235.85
   0  15  -7 1566.85  264.79
   0 -15  -7  959.90  235.15
   0 -15   7  752.72  223.18
   0 -15   8  339.22  166.91
   0  15   8  791.82  214.71
   0  15  -8  694.34  175.48
   0 -15  -8  992.41  214.18
   0 -15   8  621.60  166.71
   0 -15   9 2693.77  742.96
   0  15   9 4232.60  748.14
   0  15  -9 3160.91  708.10
   0 -15  -9 4288.50  945.97
   0 -15   9 4223.31  750.07
   0  15 -10   67.15   95.63
   0 -15 -10  192.74   91.29
   0  16   0 1455.65  280.36
   0 -16   0 1645.35  296.70
   0  16  -1  394.25  217.90
   0  16   1  883.99  305.24
   0 -16  -1  252.70  144.64
   0 -16   1   98.80  132.20
   0  16  -2  410.65  146.34
   0  16   2  483.73  229.89
   0 -16   2  245.47  195.64
   0 -16  -2  206.76  159.85
   0  16   3  166.15  200.31
   0  16  -3   39.92  145.14
   0 -16  -3  221.53  162.83
   0  16   4 5009.92  594.13
   0  16  -4 4029.57  558.07
   0 -16  -4 4163.59  518.00
   0  16   5  319.84  165.41
   0  16   6  137.41  137.71
   0 -16  -6  426.85  154.15
   0  16   7 1365.84  333.59
   0 -16  -7  950.85  329.65
   0 -16  -8 2340.78  722.31
   0  17   0  -28.59  116.07
   0  17  -1  311.23  177.96
   0  17   1  378.94  127.79
   0 -17  -1  250.93  114.41
   0  17   2  148.53  122.84
   0 -17  -2   98.75  159.58
   0  17   4  148.26  110.21
   0 -17  -4  169.36  135.27
  -1   0   0  -43.12   39.39
  -1   0   0   19.60   28.93
  -1   0   0   39.31   60.70
  -1   0   0  261.95   64.80
  -1   0   0    5.36   85.18
  -1   0   0   -7.87   85.90
   1   0   0   52.69   84.35
  -1   0   0   33.71   26.24
  -1   0   1262743.7 3672.08
  -1   0  -1273622.0 3776.42
  -1   0   1271812.4 3805.13
  -1   0  -1273184.3 3795.03
  -1   0  -1272624.4 3768.93
  -1   0   1267054.0 3781.32
  -1   0   1267276.9 3758.58
  -1   0  -1270794.9 3805.37
  -1   0   1263740.7 3743.42
  -1   0  -1280750.8 3954.31
   1   0  -1267735.7 3793.67
   1   0  -1280968.2 3890.95
  -1   0   1276342.6 3804.24
   1   0   1281830.0 3938.16
   1   0   2 6164.74  208.15
  -1   0   2 5524.09  447.18
  -1   0   2 5429.78  209.46
  -1   0  -2 5648.68  189.22
  -1   0  -2 6216.52  140.73
  -1   0   2 5463.55  221.42
  -1   0   2 5360.91  208.61
  -1   0  -2 5707.51  193.71
  -1   0  -2 5304.39  208.04
   1   0  -2 4987.50  216.47
  -1   0  -2 5428.14  228.72
   1   0  -2 5425.34  212.35
  -1   0  -2 5131.56  206.17
   1   0  -2 6225.12  152.46
  -1   0   2 6215.61  181.02
   1   0   2 5192.50  194.92
   1   0   330911.27  593.16
  -1   0   331436.66  783.37
  -1   0   331463.76  661.12
  -1   0  -330119.37  596.31
  -1   0   331036.63  644.87
  -1   0   331179.03  654.70
  -1   0  -331874.23  615.31
   1   0  -330478.83  657.96
  -1   0  -331228.21  658.79
   1   0  -333202.82  685.05
  -1   0  -331676.80  675.19
  -1   0   330015.20  581.51
   1   0   330900.30  655.93
   1   0   4246534.2 3817.97
  -1   0   4240786.1 3560.41
  -1   0   4237980.5 3526.81
  -1   0  -4241244.2 3527.62
  -1   0   4245407.4 3684.26
  -1   0   4234069.5 3406.68
  -1   0  -4239886.4 3473.39
   1   0  -4243005.3 3597.73
  -1   0  -4243281.4 3654.36
   1   0  -4237159.9 3496.21
  -1   0  -4227383.6 3366.74
  -1   0   4246621.7 3571.20
   1   0   4236909.7 3506.66
   1   0   515260.17  528.24
  -1   0   514937.14  481.13
  -1   0   514683.66  460.83
  -1   0  -514776.79  450.09
  -1   0   514267.25  445.16
  -1   0  -513833.41  398.60
   1   0  -515161.70  490.00
   1   0  -514402.58  490.38
  -1   0  -514419.02  459.66
   1   0  -515128.04  475.26
  -1   0  -515052.90  481.20
  -1   0   514079.32  433.43
   1   0   514394.79  484.93
   1   0   618243.87  731.43
  -1   0   616317.34  692.05
  -1   0  -618152.77  730.44
  -1   0   617009.83  676.62
  -1   0  -618636.34  699.19
   1   0  -619993.47  800.04
  -1   0  -616236.71  940.08
   1   0  -615858.73  688.37
  -1   0  -617750.87  751.53
   1   0  -617526.94  723.21
  -1   0  -617968.89  765.92
   1   0  -619211.95  634.61
  -1   0   617058.35  692.94
   1   0   617742.57  759.53
   1   0   711178.19  529.35
  -1   0   710713.56  642.11
  -1   0  -710375.50  519.21
   1   0  -710441.81  545.67
  -1   0   711468.98  700.70
  -1   0  -711285.89  510.54
   1   0  -711940.78  581.00
  -1   0  -710497.34  578.07
  -1   0  -711043.65  556.60
   1   0  -711205.44  559.69
  -1   0  -711404.49  547.99
  -1   0   711385.07  552.47
   1   0   711430.15  572.99
   1   0   813165.96  830.02
  -1   0   813978.50  678.71
  -1   0  -811859.39  576.95
   1   0  -813326.92  648.56
  -1   0   813899.47  704.14
  -1   0  -815015.72  598.36
   1   0  -811599.91  553.51
  -1   0  -812130.87  600.44
  -1   0  -814416.08  674.21
   1   0  -813372.17  611.61
   1   0   813263.17  590.90
  -1   0   813130.37  591.48
   1   0   813602.43  661.78
   1   0   925135.18 1122.79
  -1   0   925193.69 1189.60
  -1   0  -924753.72 1006.14
  -1   0   925640.48  977.97
   1   0  -925830.06 1020.69
  -1   0  -924847.06 1047.59
  -1   0  -923987.03  991.37
   1   0  -924501.51 1005.27
   1   0   925424.29  986.29
  -1   0   924140.81  982.63
   1   0   924706.98 1027.24
   1   0  10 3696.00 1085.09
  -1   0  10 3918.32  441.49
  -1   0 -10 5268.87  436.30
   1   0 -10 4285.04  392.55
  -1   0 -10 4544.40 1482.99
   1   0 -10 3483.11  376.89
  -1   0 -10 4159.00 1170.52
   1   0 -10 4222.61  879.74
  -1   0  10 4469.39  430.64
   1   0  10 4292.56  423.63
   1   0  11  681.82  147.83
  -1   0  11  885.47  287.37
  -1   0 -11  774.81  250.00
   1   0 -11  990.38  320.22
  -1   0 -11  532.53  319.63
   1   0 -11  310.66  213.76
  -1   0 -11  632.52  180.24
   1   0 -11  392.15  201.01
  -1   0  11  341.72  240.33
   1   0  11  354.69  291.05
   1   0  12  455.32  219.91
  -1   0  12  429.30  190.20
  -1   0 -12  569.71  242.56
   1   0 -12  575.55  290.88
  -1   0 -12  731.89  293.34
   1   0 -12  158.39  146.72
  -1   0 -12  467.39  245.19
   1   0 -12  811.14  395.52
  -1   0  12  152.34  220.84
   1   0  12  404.63  281.22
   1   0  13 2002.63  778.63
  -1   0  13 3220.94 1014.10
  -1   0 -13 2633.97 1211.73
   1   0 -13 3277.99  523.84
  -1   0 -13 2774.92  726.04
   1   0 -13 3825.13  730.48
  -1   0 -13 2306.47  715.97
   1   0 -13 2554.73  816.93
  -1   0  13 2409.78  686.71
   1   0  13 2919.41  518.55
   1   0  13 3336.43  499.08
  -1   0  13 3244.55  482.58
   1   0  13 3649.80  714.71
  -1   0  13 2966.07 1358.96
  -1   0 -13 2998.98  437.02
   1   0 -13 2494.81  430.72
  -1   0 -13 3510.31  518.91
   1   0 -13 3620.58  532.24
  -1   0 -13 3143.76  844.14
   1   0  14 4360.14  987.67
  -1   0  14 5006.70  660.72
   1   0  14 5278.95 1043.75
  -1   0  14 6128.68 1068.08
  -1   0 -14 3885.68  578.52
   1   0 -14 5388.83 1222.12
  -1   0 -14 3631.19  528.47
   1   0 -14 4867.72  779.19
   1   0  15 4349.45  823.23
  -1   0  15 4513.24  463.85
   1   0  15 3927.63  645.35
  -1   0  15 4173.95  774.68
  -1   0 -15 3239.51  380.93
   1   0 -15 3885.15  428.24
  -1   0 -15 3444.90  357.55
   1   0 -15 3549.58  373.21
   1   0  15 4011.49  512.05
   1   0  16 1108.76  344.45
  -1   0  16  576.17  243.95
   1   0  16  644.28  301.18
  -1   0  16  606.76  198.73
  -1   0 -16  762.86  207.10
   1   0 -16  726.48  203.27
  -1   0 -16  370.13  181.63
   1   0  16 1019.72  342.34
   1   0  1729634.19 1052.58
  -1   0  1728018.11 1430.12
   1   0  1725912.57 1158.34
  -1   0  1727655.07 2482.98
  -1   0 -1725524.87  842.83
   1   0 -1725161.64  826.84
   1   0  1724494.56  823.03
   1   0  18  391.06  204.14
  -1   0  18  380.28  167.66
   1   0  18  234.55  133.69
  -1   0 -18 1371.08  291.54
   1   0 -18  383.60  210.47
   1   0  18  247.34   81.34
  -1   0  19 1503.10  396.86
  -1   0  19 1605.33  537.26
  -1   0 -19 1967.37  276.01
   1   0 -19 1861.89  236.11
   1   0  19 1645.89  289.91
  -1   0  20  306.58  128.86
  -1   0  20   40.76  117.94
  -1   0 -20  453.23  146.18
   1   0 -20  158.48   66.48
   1   0  20   86.89  115.05
  -1  -1   072979.86 1037.54
  -1   1   066741.39 1055.64
  -1   1   069642.65 1112.80
  -1  -1   068406.55 1074.10
  -1   1   067682.16 1066.07
  -1   1   069936.03 1110.42
  -1   1   067033.99 1058.96
  -1  -1   071779.19 1132.50
  -1  -1   071398.26 1114.28
  -1  -1   068460.65 1074.64
   1  -1   069493.47 1099.66
  -1  -1   069677.34 1088.10
  -1  -1   141078.42  674.38
  -1   1   141977.82  742.76
  -1   1  -139742.98  695.81
  -1  -1   142079.87  690.13
  -1   1   140101.43  727.22
  -1   1  -142219.80  746.13
  -1  -1  -140413.26  678.32
  -1   1   141188.53  750.44
  -1   1  -143390.14  702.49
  -1  -1   140266.12  714.67
  -1  -1  -141011.56  681.06
  -1   1   141264.70  718.73
  -1   1  -141374.06  740.81
  -1   1   139365.97  682.80
  -1   1  -139637.86  713.37
  -1  -1  -142821.12  739.18
   1   1  -139495.91  707.54
  -1   1  -140127.77  718.16
  -1  -1  -138629.12  691.68
   1  -1  -140118.02  730.44
   1   1  -141225.00  706.66
  -1  -1  -140717.91  747.79
  -1  -1   142289.15  677.46
   1  -1  -143507.96  733.77
   1  -1   140796.53  730.16
  -1  -1  -139916.27  708.84
  -1  -1   141663.35  707.89
   1  -1   142478.34  701.90
   1  -1   2221462.6 3163.51
  -1  -1   2216106.3 3106.09
   1   1   2234617.7 3271.40
  -1   1   2214182.1 3108.11
  -1  -1   2218063.9 3134.58
  -1   1   2215542.9 3139.65
  -1   1  -2215426.6 3119.88
  -1  -1  -2224910.3 3137.57
  -1  -1   2220186.9 3188.07
  -1   1   2218964.3 3191.44
  -1   1  -2229222.4 3171.92
  -1  -1   2212774.3 3089.73
  -1   1   2223600.2 3195.78
  -1  -1  -2224613.8 3160.10
  -1   1  -2222561.6 3224.13
  -1   1  -2223809.2 3234.23
  -1  -1  -2216758.4 3139.30
   1   1  -2222244.4 3220.55
   1  -1  -2218976.5 3189.53
  -1   1  -2223878.3 3217.52
  -1  -1  -2222340.1 3221.57
   1  -1  -2212932.2 3109.67
   1   1  -2224733.0 3218.03
  -1  -1  -2219129.3 3192.41
   1  -1   2216768.3 3149.09
  -1  -1  -2218650.9 3167.77
  -1  -1   2228324.8 3263.38
   1  -1   2213576.7 3079.81
  -1   1   2224329.0 3108.27
   1  -1   3198689.9 2916.46
  -1  -1   3189266.0 2844.61
   1   1   3202143.3 2911.42
  -1   1   3191156.7 2848.16
  -1   1   3194212.6 2944.36
  -1   1  -3194106.7 2882.32
  -1  -1  -3195413.9 2811.44
   1   1  -3194743.5 2883.22
  -1  -1   3193407.3 2913.71
  -1   1   3194309.1 2897.42
  -1   1   3199703.6 2884.96
  -1  -1  -3197270.1 2804.21
  -1   1  -3197964.1 2929.31
   1   1  -3191496.1 2895.55
  -1   1  -3205587.1 3040.68
  -1  -1  -3202441.5 2993.49
   1  -1  -3194526.1 2906.26
   1   1  -3191148.6 2856.01
  -1   1  -3203445.5 3052.86
   1  -1  -3197150.0 2943.81
  -1  -1  -3196591.2 2939.17
   1  -1   3192256.1 2859.92
  -1  -1   3197081.7 2891.08
  -1   1   3186515.1 2667.35
   1  -1   3194211.9 2887.27
   1   1   3192930.7 2873.04
   1  -1   4268600.6 3906.80
  -1  -1   4268446.9 4012.62
   1   1   4287125.1 4129.96
  -1   1   4276643.6 4074.51
  -1   1   4281675.6 4167.33
  -1   1  -4269964.0 3941.52
  -1  -1  -4277984.3 3994.86
   1   1  -4277064.2 4046.11
  -1  -1   4280934.0 4085.63
  -1   1   4272285.7 4019.92
  -1   1   4288631.9 4122.94
  -1  -1  -4283111.9 3989.21
  -1   1  -4278984.6 4056.85
   1   1  -4272755.7 4038.34
  -1   1  -4291514.2 4253.62
  -1  -1  -4289441.4 4220.33
   1  -1  -4284708.8 4166.04
   1   1  -4271730.9 3984.23
  -1   1  -4288678.6 4186.59
  -1  -1  -4284897.4 4184.60
   1   1  -4290554.1 4184.67
   1  -1  -4272418.0 3996.48
  -1  -1  -4274811.8 4091.10
   1  -1   4273867.3 3995.90
  -1  -1   4280808.5 4076.24
   1  -1   4265823.4 3899.26
  -1   1   4276541.9 3960.47
   1  -1   5168779.8 2620.41
  -1  -1   5163194.1 2578.85
   1   1   5166419.1 2550.21
  -1   1   5164531.8 2606.86
  -1   1   5168192.8 2695.73
  -1   1  -5167892.9 2619.91
  -1  -1  -5169874.3 2605.91
   1   1  -5170677.0 2675.43
  -1  -1   5172864.8 2677.50
  -1   1   5172668.6 2687.77
  -1   1  -5175453.6 2722.81
   1   1  -5173756.7 2759.86
   1  -1  -5173194.0 2654.32
  -1   1  -5175775.0 2772.36
  -1  -1  -5172908.0 2834.80
   1  -1  -5163894.8 2599.68
   1   1  -5172214.1 2705.23
  -1   1  -5165241.3 2630.97
  -1  -1  -5166075.0 2659.96
   1   1  -5172164.2 2646.25
   1  -1  -5171843.3 2704.93
  -1  -1  -5168595.0 2650.05
   1  -1   5163237.7 2551.68
  -1  -1   5171691.8 2667.73
   1  -1   5166473.8 2613.30
  -1   1   5170637.4 2592.83
   1   1   5164728.4 2597.95
   1  -1   621115.28  821.63
  -1  -1   621242.73  868.73
   1   1   621418.32  819.62
  -1   1   619800.57  845.83
  -1   1   620475.60  819.46
  -1   1  -620438.12  811.72
  -1  -1  -621189.16  818.41
   1   1  -621074.95  843.61
  -1  -1   621897.54  851.98
  -1   1   621329.28  850.39
   1   1   624583.12  818.68
  -1  -1  -623359.56  804.51
  -1   1  -620884.29  808.93
   1   1  -620671.89  832.42
   1  -1  -621314.92  804.35
  -1  -1  -621074.03  828.82
  -1   1  -619638.26  788.84
   1   1  -620210.09  806.13
   1  -1  -620438.45  965.72
  -1   1  -621316.46  836.84
  -1  -1  -621003.54  884.73
   1   1  -621896.81  840.02
   1  -1  -622171.25  880.13
  -1  -1  -621978.51  867.67
   1  -1  -623467.29  898.33
   1  -1   620821.12  804.69
  -1  -1   621043.47  818.42
  -1   1   621718.56  822.40
   1  -1   621456.93  855.61
   1   1   620573.95  824.73
   1  -1   748901.86 1674.01
  -1  -1   750440.93 1764.75
   1   1   748819.86 1675.72
  -1   1   750268.07 1783.67
  -1   1   747725.36 1668.11
  -1   1  -745986.25 1606.60
   1   1  -748651.01 1699.25
  -1  -1  -749329.60 1683.91
  -1  -1   748478.02 1636.29
  -1   1   750705.71 1878.13
  -1  -1  -753083.78 1702.53
  -1   1  -748003.93 1632.83
   1   1  -746794.22 1641.18
   1  -1  -749317.24 1660.84
  -1  -1  -748452.26 1682.97
  -1   1  -747320.87 1652.67
   1  -1  -746646.47 1629.99
   1   1  -749480.69 1730.14
  -1   1  -750590.15 2089.61
  -1  -1  -749637.00 1746.90
   1   1  -752080.26 1767.53
   1  -1  -750133.35 1736.31
  -1  -1  -751617.64 1772.01
   1  -1   749677.96 1679.82
  -1  -1   748992.82 1681.71
  -1   1   750102.78 1706.14
   1  -1   749344.38 1730.37
   1   1   751329.93 1791.05
   1  -1   8 7545.69  426.12
   1   1   8 8225.12  630.83
  -1  -1   8 8544.69 1657.28
  -1   1   8 7018.30  734.85
  -1   1  -8 8090.80  489.88
  -1  -1  -8 7972.36  466.21
   1   1  -8 7703.60  504.10
   1  -1  -8 7490.52  446.08
  -1  -1   8 8719.62  447.73
  -1   1   8 7559.38  437.38
  -1   1  -8 8560.40  468.63
   1   1  -8 9047.64  523.35
   1  -1  -8 7664.48  408.71
  -1   1  -8 7812.75  510.99
  -1  -1  -8 6766.25  488.21
   1  -1  -8 7883.84  504.11
   1   1  -8 8742.82  507.77
  -1   1  -8 7753.07  438.80
  -1  -1  -8 8529.48  498.88
   1  -1  -8 7773.76  491.72
   1   1  -8 8254.43  499.27
  -1  -1  -8 7882.59  721.89
   1  -1   8 8175.13  455.29
  -1  -1   8 7263.97  442.77
  -1   1   8 7814.73  471.28
   1  -1   8 8605.28  530.64
   1   1   8 8318.13  516.77
   1  -1   977863.81 2477.49
  -1  -1   973555.65 2511.94
   1   1   976891.51 2433.71
  -1   1   972887.34 2464.89
  -1   1  -975040.38 2421.13
  -1  -1  -972063.44 2307.81
   1   1  -976440.13 2452.09
   1  -1  -973694.89 2367.83
  -1  -1   979444.00 2467.10
  -1   1   977733.53 2442.54
  -1   1  -978422.48 2454.22
   1   1  -977372.56 2469.32
  -1  -1  -975261.27 2457.31
  -1   1  -970077.51 2303.09
   1   1  -978645.14 2518.07
   1  -1  -978259.04 2504.76
  -1   1  -978048.74 2560.55
  -1  -1  -972410.04 3727.54
   1   1  -976229.02 2424.17
   1  -1  -976419.58 2456.98
  -1  -1  -978145.30 2456.80
   1  -1   977919.90 2429.52
  -1  -1   976215.56 2424.12
  -1   1   978902.90 2488.71
   1   1   975196.43 2439.44
   1  -1  10 3162.49  828.80
   1   1  10 2603.38  641.46
  -1  -1  10 4064.41 1102.69
  -1   1  10 2990.87 1053.45
  -1   1 -10 2844.78  341.03
  -1  -1 -10 3652.82  355.23
   1   1 -10 2810.92  347.69
   1  -1 -10 3479.92  450.43
   1   1 -10 3312.20  500.01
  -1  -1 -10 3803.49 1134.62
  -1   1 -10 3543.12  900.03
   1   1 -10 3521.40  363.93
   1  -1 -10 3656.09  379.98
  -1   1 -10 3136.56  914.81
  -1  -1 -10 3185.57  930.10
   1  -1 -10 3649.89  903.58
   1   1 -10 3399.95  851.11
   1   1  10 3534.09  424.86
  -1  -1  10 3308.31  345.58
  -1   1  10 3497.44  364.17
   1  -1  10 3294.75  363.61
   1   1  10 2791.15  339.24
   1  -1  11 3398.36 1033.95
  -1  -1  11 2762.57  859.67
   1   1  11 2799.80  662.06
  -1   1  11 3459.39  749.29
  -1   1 -11 3210.72  412.98
  -1  -1 -11 3334.22  379.07
   1   1 -11 3542.76  427.36
   1  -1 -11 3082.73  359.13
  -1   1 -11 3266.61 1010.78
  -1  -1 -11 3209.94  850.72
   1  -1 -11 3203.55  402.63
   1   1 -11 2940.12  384.63
  -1   1 -11 2631.92  774.95
  -1  -1 -11 4237.58  908.22
   1  -1 -11 3264.37  791.11
   1   1 -11 3148.29  574.73
  -1  -1  11 3664.96  440.83
  -1   1  11 3550.51  399.14
   1  -1  11 3449.17  383.93
   1   1  11 4152.54  455.98
   1  -1  12 1933.41  646.57
  -1  -1  12 1959.25  433.82
   1   1  12 2016.51  716.90
  -1   1  12 2516.83  580.50
  -1   1 -12 1947.10  361.44
  -1  -1 -12 2914.85  489.24
   1  -1 -12 2390.28  413.55
  -1  -1 -12 2257.08  671.31
  -1   1 -12 1913.50  454.56
   1  -1 -12 2088.49  401.59
   1   1 -12 1841.41  348.29
  -1   1 -12 1438.63  556.92
  -1  -1 -12 1867.18  537.50
   1   1 -12 1544.85  403.71
   1  -1 -12 1727.48  374.83
  -1   1  12 2488.60  399.60
  -1  -1  12 1699.09  330.68
   1  -1  12 2637.99  507.45
   1   1  12 2804.25  467.00
   1  -1  1313065.25 3624.35
  -1  -1  1318497.71 2093.16
   1   1  1317181.83 1954.98
  -1   1  1318734.93 2117.15
  -1   1 -1318123.96 2084.14
   1   1 -1317162.37 1963.44
  -1  -1 -1316279.79 1902.65
   1  -1 -1317922.53 2037.99
  -1   1 -1315038.21 3969.51
  -1  -1 -1315300.66 3970.88
   1  -1 -1316620.89 1900.40
   1   1 -1318274.56 2073.95
  -1  -1 -1316341.46 2100.28
   1  -1 -1315626.44 3714.98
  -1  -1  1320558.29 2333.22
   1   1  1317997.01 2054.14
   1  -1  1319013.94 2167.01
   1  -1  1315903.99 3307.42
   1   1  1314965.94 1711.03
  -1  -1  1315648.95 1748.64
  -1   1  1315633.22 1740.82
   1  -1  1315777.14 2297.71
  -1  -1  1316811.36 2893.00
   1   1  1311833.57 2190.14
  -1   1  1314504.10 2499.22
  -1  -1 -1316092.84 1779.73
  -1   1 -1313295.50 1511.56
   1  -1 -1313316.95 1506.15
   1   1 -1313783.87 1565.46
  -1  -1 -1316175.90 1978.26
   1  -1 -1316099.43 1795.99
  -1  -1 -1316081.00 1802.16
  -1  -1  1314200.68 1624.46
   1  -1  1316053.26 1801.47
   1  -1  1415815.42 1807.55
  -1  -1  1412879.00 1428.13
   1   1  1413768.58 1528.50
  -1   1  1412104.86 1345.62
   1   1  1413007.09 2315.86
   1  -1  1413899.56 1760.10
  -1  -1  1413465.95 1899.68
  -1   1  1415200.17 2823.57
  -1  -1 -1411904.97 1327.98
  -1   1 -1412619.06 1395.74
   1  -1 -1412820.15 1441.15
   1   1 -1415082.50 2730.41
  -1  -1 -1415278.48 2770.06
   1  -1 -1413286.29 1469.05
  -1  -1 -1415079.65 3066.63
  -1  -1  1412225.41 1384.16
   1  -1  1413176.03 1476.14
   1  -1  15 3115.67  674.28
   1   1  15 2930.83  596.32
  -1  -1  15 2858.51  377.70
  -1   1  15 4041.17  464.13
   1  -1  15 3073.00  525.76
   1   1  15 2753.25  618.11
  -1   1  15 4570.80  771.22
  -1  -1  15 2608.09  670.46
  -1  -1 -15 4022.84  406.36
  -1   1 -15 2666.36  326.72
   1   1 -15 2721.84  328.73
   1  -1 -15 3067.14  389.73
  -1  -1 -15 2424.70  334.14
   1  -1 -15 3452.85  419.17
  -1  -1  15 2983.85  703.05
   1   1  15 2628.11  408.99
   1  -1  15 3526.61  422.32
   1  -1  16 3209.51  511.73
  -1  -1  16 3278.93  718.00
   1   1  16 2701.20  597.97
  -1   1  16 2709.35  357.42
   1  -1  16 3171.25  760.93
   1   1  16 2329.90  473.06
  -1  -1  16 2960.29  683.92
  -1   1  16 3361.55  739.42
  -1   1 -16 2789.50  318.24
  -1  -1 -16 1539.73  292.62
   1   1 -16 3479.60  387.47
   1  -1 -16 2800.26  367.25
  -1  -1 -16 2820.26  362.38
   1  -1 -16 1902.21  287.98
  -1  -1  16 2703.48  384.67
   1  -1  16 2452.03  418.28
   1   1  16 3676.12  499.41
   1  -1  17 3203.33  684.97
  -1   1  17 2425.67  439.31
  -1  -1  17 3901.44  666.81
   1  -1  17 2469.54  619.43
   1   1  17 1583.49  549.18
  -1  -1  17 2912.88  557.64
  -1   1  17 3192.23  434.03
  -1  -1 -17 4570.96  686.35
  -1   1 -17 3761.82  544.78
   1   1 -17 2881.48  315.63
   1  -1 -17 3344.10  338.59
  -1  -1 -17 2831.75  317.84
   1  -1 -17 1702.87  294.11
   1   1  17 3277.29  434.81
   1  -1  17 2195.18  315.13
   1  -1  18 1003.78  187.48
  -1  -1  18 1616.47  361.58
  -1   1  18 1041.08  255.86
   1  -1  18  561.05  317.38
  -1  -1  18 1159.14  422.85
  -1   1  18  957.58  298.57
  -1   1 -18  750.93  200.23
  -1  -1 -18  503.12  182.41
   1  -1 -18  563.65  179.45
   1   1 -18  936.96  210.27
  -1  -1 -18  694.13  185.34
   1  -1  18 1629.37  254.87
   1   1  18  901.07  262.71
  -1   1  19 1695.87  295.09
  -1  -1  19 1828.03  321.25
  -1   1  19 1183.13  469.62
  -1  -1  19 1730.11  463.87
  -1   1 -19 1522.44  232.20
  -1  -1 -19 1883.36  261.23
  -1   1 -19 1904.52  247.37
   1   1 -19 1841.74  295.25
   1  -1 -19 1743.63  398.99
   1  -1  19 1591.43  236.78
   1   1  19 2292.21  310.84
  -1   1  20  119.58  112.66
  -1  -1  20  108.22  151.34
  -1  -1  20   55.55  109.49
  -1   1  20  171.59  102.34
  -1  -1 -20  452.54  199.69
  -1   1 -20  122.49  136.03
   1  -1 -20   77.32   96.40
   1   1 -20  411.40  157.83
   1  -1  20  174.77  128.51
  -1   2   053572.00  955.29
  -1   2   051800.85  932.31
  -1  -2   054416.95  946.22
  -1   2   054702.46  965.46
  -1  -2   053001.14  932.54
  -1   2   054058.07  939.69
  -1  -2   052747.80  863.82
  -1   2   054751.02  892.48
  -1  -2   053298.06  881.45
   1  -2   052241.01  901.39
  -1  -2   055681.22  962.05
   1  -2   053362.05  938.05
   1  -2   056203.86  894.40
  -1  -2   112502.40  305.89
   1   2   112969.90  273.90
  -1   2   111431.80  346.77
  -1   2  -112443.24  370.99
  -1   2  -112866.20  378.88
   1   2  -112710.41  303.23
  -1  -2  -112510.78  356.50
  -1  -2   112496.42  372.82
  -1   2   112569.87  385.95
  -1   2  -112862.89  341.66
  -1  -2  -112114.91  303.22
  -1   2   112789.22  334.61
  -1   2  -112149.26  367.77
  -1   2  -112696.99  323.59
  -1  -2  -112764.71  351.09
   1  -2  -112049.86  334.45
   1   2  -112757.20  338.20
  -1   2  -111947.22  448.57
  -1  -2   111720.75  270.16
  -1  -2  -112739.95  330.80
   1  -2  -111394.97  367.28
  -1  -2  -112410.76  482.48
  -1  -2   112576.05  322.12
   1  -2  -112650.32  359.89
   1  -2   111337.52  348.51
  -1  -2  -112580.44  425.29
   1  -2  -113415.12  270.51
  -1  -2   111456.65  350.37
   1  -2   112922.13  322.20
  -1  -2   2627487.4 8678.13
  -1   2   2625901.9 8731.38
  -1   2  -2639045.5 8900.50
  -1   2   2645452.4 9005.43
  -1   2  -2654434.1 9110.51
   1   2  -2653161.6 9018.39
  -1  -2   2632011.0 8779.88
  -1   2  -2651021.0 8962.61
   1   2   2645917.2 8976.15
  -1   2  -2633597.4 8819.85
   1   2  -2649041.4 9082.14
  -1  -2  -2622266.5 8609.59
  -1   2  -2644679.5 8932.02
   1  -2  -2644520.6 8926.46
   1   2  -2644193.0 8918.94
  -1  -2  -2634239.5 8811.71
   1  -2  -2624935.3 8697.43
  -1  -2   2665719.4 9136.28
   1  -2   2628193.9 8753.20
  -1  -2   2662510.9 9193.59
   1  -2   2647694.2 8970.14
  -1   2   2614907.8 8436.96
   1  -2   3111740.3 1783.13
  -1  -2   3108203.8 1848.26
   1   2   3117481.6 1788.24
   1   2   3114400.6 1744.95
  -1   2   3112382.9 1822.29
  -1   2  -3112859.4 1832.79
   1   2  -3111694.7 1774.90
  -1  -2   3109178.9 1751.95
  -1   2   3112222.0 1821.81
   1   2   3116094.4 1813.90
  -1  -2  -3113792.0 1657.77
  -1   2   3115771.0 1752.97
   1   2  -3108108.1 1822.84
  -1   2  -3114108.3 1806.92
  -1  -2  -3112022.2 1776.59
   1   2  -3106310.3 1702.07
   1  -2  -3114919.5 1830.87
  -1   2  -3115555.4 1814.56
  -1  -2  -3111996.2 1817.84
   1  -2  -3108526.4 1770.84
   1   2  -3113883.5 1728.75
  -1  -2  -3110959.9 1817.18
  -1  -2   3116198.4 1671.09
   1  -2  -3114945.7 1790.56
   1  -2   3109672.1 1770.15
  -1  -2  -3110640.7 1789.14
  -1  -2   3109825.9 1761.73
   1  -2   3110509.9 1781.16
  -1   2   3109912.9 1650.10
   1  -2   426252.69  632.71
  -1  -2   426376.78  647.43
   1   2   427564.36  599.75
  -1   2   426280.38  658.63
  -1   2   427750.49  672.25
  -1   2  -424696.98  629.92
   1   2  -427066.18  928.55
  -1  -2  -426801.83  568.17
  -1  -2   425718.95  621.29
  -1   2   427058.32  666.82
   1   2   426567.15  587.05
  -1   2  -425457.48  480.84
  -1   2   427709.72  559.31
  -1  -2  -427789.69  466.50
  -1   2  -428853.40  693.47
   1   2  -425388.90  688.27
  -1  -2  -427745.98  640.87
  -1   2  -427994.14  653.48
   1  -2  -425183.88  618.89
   1   2  -426867.03  647.16
  -1   2  -428362.68  959.88
  -1  -2  -425430.17  678.88
   1   2  -428864.83  610.33
   1  -2  -425965.98  658.94
  -1  -2  -426205.15  655.21
   1  -2  -428173.17  711.48
   1  -2   426253.76  625.05
  -1  -2   425838.39  630.98
   1  -2   426717.44  660.22
  -1   2   428241.19  580.91
   1   2   427429.45  676.46
   1  -2   585616.88 1533.73
  -1  -2   584107.26 1669.88
   1   2   586633.37 1473.29
  -1   2   590179.60 1622.82
  -1   2   583792.70 1525.56
  -1   2  -582469.88 1513.93
   1   2  -585516.51 1540.60
  -1  -2  -586297.41 1458.84
  -1  -2   586486.51 1596.07
  -1   2   587084.79 1559.40
   1   2   589005.43 1478.33
  -1   2  -591738.49 1375.80
  -1   2   590218.53 1511.88
  -1  -2  -588037.49 1270.63
  -1   2  -587243.17 1581.82
   1   2  -584939.34 1583.75
  -1   2  -586045.10 1538.38
  -1  -2  -587165.66 1572.59
   1   2  -583408.26 1494.95
   1  -2  -584969.68 1511.02
  -1   2  -587088.71 1520.18
  -1  -2  -585724.85 1657.26
   1   2  -592620.07 1547.34
   1  -2  -584766.91 1543.12
  -1  -2  -584325.66 1525.69
   1  -2  -587825.05 1475.31
   1  -2   589307.80 1558.09
  -1  -2   585506.94 1524.57
   1  -2   584741.64 1549.44
  -1   2   589550.74 1494.47
   1   2   585622.55 1535.56
   1  -2   640218.73 1408.36
  -1  -2   640526.52 1489.54
   1   2   640443.33 1375.81
  -1   2   640336.14 1427.42
  -1   2   640246.98 1431.19
  -1   2  -640695.03 1433.88
   1   2  -639774.78 1408.95
  -1  -2  -640243.34 1370.52
  -1  -2   642665.70 1455.99
  -1   2   641038.28 1429.57
   1   2   647421.08 1545.59
  -1   2  -645901.65 1574.95
   1   2  -643377.69 1532.24
   1  -2  -643926.55 1449.02
  -1   2  -640519.71 1483.36
  -1  -2  -639928.08 1395.53
   1   2  -640976.54 1429.32
   1  -2  -643257.48 1502.93
  -1   2  -642505.40 1497.40
  -1  -2  -640411.47 1435.34
   1  -2  -642545.37 1514.35
   1   2  -641470.37 1400.28
  -1  -2  -641085.56 1443.28
   1  -2  -646064.36 1609.46
   1  -2   641630.98 1427.38
  -1  -2   640270.84 1404.69
   1  -2   641935.19 1489.52
  -1   2   644681.74 1494.82
   1   2   640239.69 1412.30
   1  -2   725082.64  995.40
  -1  -2   721920.35  896.93
   1   2   725169.76 1086.27
  -1   2   723617.29  962.74
  -1   2  -722971.24  948.50
   1   2  -723627.73  962.69
  -1  -2  -723775.43  935.65
  -1  -2   725469.25 1004.05
  -1   2   725244.31 1012.20
  -1   2  -724221.78  970.10
   1   2  -723920.08  992.20
  -1  -2  -723902.56  973.09
  -1   2  -723099.86 1322.94
   1   2  -723809.11  943.66
   1  -2  -727086.27 1070.47
  -1   2  -725605.43 1078.57
  -1  -2  -724521.28 1039.32
   1   2  -726104.65  982.63
   1  -2  -725514.13 1045.05
  -1  -2  -727030.51 1279.13
   1  -2  -726161.20  953.36
   1  -2   725751.61  991.73
  -1  -2   724161.60 1034.85
   1  -2   725379.66 1033.95
  -1   2   725665.91  970.70
   1   2   724095.13  977.87
   1  -2   869053.27 2835.70
   1   2   872202.50 2156.95
  -1   2   869029.49 2432.96
  -1   2   868756.54 2592.93
  -1   2  -869689.70 2505.97
   1   2  -868260.46 2112.53
  -1  -2  -871841.08 2166.86
  -1  -2   870863.24 2684.64
  -1   2   871702.69 2160.41
  -1   2  -872675.62 2222.63
   1   2  -869174.53 2152.48
  -1   2  -867093.09 2185.75
  -1  -2  -865416.89 2165.01
   1   2  -866294.31 2051.14
   1  -2  -867116.12 2068.31
  -1   2  -868168.01 2242.54
  -1  -2  -868654.93 2193.32
   1  -2  -874817.70 2297.75
   1   2  -870222.27 2098.49
  -1  -2  -871988.68 2185.45
   1  -2   872357.17 2149.27
  -1  -2   865517.63 2051.93
   1  -2   868413.80 2122.87
  -1   2   870686.12 2120.20
   1   2   870589.10 2166.09
   1  -2   939489.44 1485.00
  -1  -2   942292.22 1534.88
   1   2   939123.60 2692.72
  -1   2   940622.45 1532.57
  -1   2  -939467.81 1495.14
   1   2  -936488.95 1352.94
  -1  -2  -938718.50 1395.25
   1  -2  -938292.57 1418.56
  -1  -2   942009.46 1467.55
  -1   2   941868.70 1725.89
  -1   2  -939580.78 1427.05
   1   2  -942778.74 1562.82
  -1  -2  -938852.18 1465.53
  -1   2  -940398.84 2262.31
   1  -2  -938490.37 1443.50
   1   2  -941999.62 1512.09
  -1   2  -939704.26 1433.57
  -1  -2  -941624.75 1518.41
   1   2  -940203.42 1421.00
   1  -2  -939259.30 1448.41
  -1  -2  -942188.66 1512.49
   1  -2   942156.69 1468.21
  -1  -2   936993.19 1376.97
   1  -2   941345.45 1511.50
  -1   2   940154.34 1430.16
   1   2   941024.76 1503.63
   1  -2  1020454.00  981.39
  -1  -2  1022046.91 1945.90
   1   2  1017713.03  905.38
  -1   2  1018486.38 1112.02
  -1   2 -1020103.36 1013.37
  -1  -2 -1019157.77  940.23
   1   2 -1020102.23  996.38
   1  -2 -1018900.19  967.60
  -1   2  1020461.52 1162.86
  -1   2 -1019748.22  977.05
   1   2 -1019543.20  975.55
  -1   2 -1018864.30  943.86
  -1  -2 -1018589.43 1021.17
   1   2 -1020281.79 1007.91
   1  -2 -1018543.61 1285.36
  -1   2 -1021185.86 1018.91
  -1  -2 -1021315.47 1045.31
   1   2 -1019803.58  945.46
   1  -2 -1017771.08 1228.49
  -1  -2 -1018696.44 1233.32
  -1  -2  1020743.17 1015.75
  -1   2  1019279.19  927.43
   1   2  1018470.32  925.94
   1  -2  1113178.71 2261.98
  -1  -2  1113684.15  742.42
   1   2  1113658.10  737.33
  -1   2  1114125.64  764.79
  -1   2 -1116620.65  892.53
   1   2 -1115263.80  776.73
  -1  -2 -1113005.71  693.10
   1  -2 -1114262.99  797.01
  -1   2 -1112396.70 2535.06
  -1  -2 -1113878.15 1079.96
   1  -2 -1114399.81 1019.47
   1   2 -1114612.15 1244.21
  -1   2 -1114533.42  738.40
  -1  -2 -1115766.62 1258.53
   1  -2 -1117817.28 2058.29
  -1  -2  1115168.84  793.57
  -1   2  1113784.21  720.12
   1  -2  1116956.63  873.80
   1   2  1112752.88  742.17
   1  -2  1211146.05 1517.27
  -1  -2  12 9630.91 2429.90
   1   2  12 8535.22 2662.40
  -1   2  12 8912.09 1749.36
  -1   2 -1212351.16 1115.12
   1   2 -1210695.07 1000.33
  -1  -2 -1212017.81 1075.04
   1  -2 -1211304.90 1033.20
  -1  -2 -1210133.06 2981.73
  -1   2 -12 9784.98 2365.29
   1   2 -1212672.11 1123.70
   1  -2 -1211631.19 1055.23
  -1  -2 -1210277.16 2322.21
   1  -2 -1211912.85 2138.18
  -1  -2  1215371.04 1349.87
   1  -2  1210364.29 1024.89
   1   2  1212122.73 1112.23
  -1  -2  1210002.88  908.39
  -1   2  12 9409.57  857.42
  -1  -2  1211210.01 1936.49
  -1   2 -1210136.43  903.25
  -1  -2 -1210342.32  921.42
   1  -2  1210811.96  977.14
   1  -2  13 3722.44 1289.61
  -1  -2  13 3518.22  928.18
  -1   2  13 4986.44 1295.96
  -1   2 -13 6404.94  934.17
   1   2 -13 4381.26  671.44
   1  -2 -13 5219.02  816.75
  -1  -2 -13 4703.77 1367.86
  -1   2 -13 4342.85 1280.52
   1  -2 -13 4865.59  725.11
   1   2 -13 4692.02  716.08
  -1  -2 -13 3744.66 1123.48
   1  -2 -13 4494.42  968.14
  -1  -2  13 5270.02  789.98
   1  -2  13 5297.53  808.82
   1   2  13 5254.10  772.51
   1  -2  13 5296.51  921.18
  -1  -2  13 4088.71  608.13
  -1   2  13 5296.83 1170.40
   1  -2  13 4390.97 1101.13
  -1  -2  13 5829.19 1443.74
  -1   2  13 4422.53 1035.93
  -1  -2 -13 4508.30  997.99
  -1   2 -13 4534.49  614.14
   1  -2 -13 4257.72  582.56
   1   2 -13 3972.55  598.07
  -1  -2 -13 5366.49  724.62
   1  -2 -13 4577.27  623.15
  -1  -2 -13 4399.13  994.77
  -1  -2  13 5127.99  807.70
   1  -2  13 7305.55  950.28
   1  -2  1414388.20 1899.17
  -1  -2  1418298.59 1491.01
  -1   2  1414174.57  784.85
   1  -2  1415995.08 2201.88
  -1  -2  1416991.04 2471.92
  -1   2  1413866.97  999.74
  -1   2 -1413685.25  762.19
  -1  -2 -1414881.17  769.32
   1   2 -1413117.70  724.13
   1  -2 -1413740.38  772.98
  -1  -2 -1414246.61  802.89
   1  -2 -1413292.93  791.51
  -1  -2 -1415070.99 2032.56
  -1  -2  1414304.08 2561.24
   1  -2  1416856.87 2514.52
   1  -2  15 3245.41  542.42
  -1  -2  15 3443.64  369.05
  -1   2  15 2696.32  322.32
   1  -2  15 2905.49  490.27
  -1  -2  15 3194.63  632.35
  -1   2  15 3830.39  620.67
  -1  -2 -15 3422.55  391.27
  -1   2 -15 2942.20  345.88
   1   2 -15 3796.21  417.70
   1  -2 -15 3201.50  414.75
  -1  -2 -15 2840.39  373.95
   1  -2 -15 3127.18  404.91
  -1  -2 -15 3302.75 1227.20
  -1  -2  15 4547.81  470.78
   1  -2  15 4623.76  573.03
   1  -2  16 8852.02 1446.67
  -1  -2  16 8928.80 1884.95
  -1   2  16 8269.89  578.13
   1  -2  16 7358.62 1511.97
  -1  -2  16 9305.95 1385.31
  -1   2  16 7822.31 1026.44
  -1  -2 -16 8427.04 1847.21
  -1   2 -16 7233.36  521.18
   1   2 -16 8085.97  520.93
   1  -2 -16 7751.63  495.61
  -1  -2 -16 9446.15  907.83
   1  -2 -16 8030.55  566.20
  -1  -2  16 8976.26  601.10
   1  -2  16 7495.65  512.68
   1   2  16 8684.25  850.93
   1  -2  17  411.67  175.82
  -1  -2  17  763.67  230.33
  -1   2  17  439.61  195.62
   1  -2  17  444.47  214.97
  -1  -2  17  417.11  221.23
  -1   2  17  616.19  152.38
  -1  -2 -17  495.96  222.79
  -1   2 -17  654.85  177.90
   1  -2 -17  497.57  179.75
   1   2 -17  245.37  186.23
  -1  -2 -17  438.71  209.58
   1  -2 -17  364.37  263.15
  -1  -2  17  428.38  185.05
   1  -2  17  360.91  199.16
   1   2  17  119.35  201.54
   1  -2  1810566.97 1376.62
  -1  -2  1811278.44 1391.96
  -1   2  1813006.79 1219.40
   1  -2  18 8532.22 1990.79
  -1  -2  1811314.33 1850.98
  -1   2  1811331.72 1283.26
  -1  -2 -1811172.38  894.86
  -1   2 -1810118.86  931.55
   1  -2 -1811069.78  570.33
   1   2 -18 9691.86  488.47
  -1  -2 -1810048.53 1620.27
   1  -2 -1811790.99  918.88
   1  -2  1810419.81  549.12
   1   2  1811452.61  910.37
   1  -2  19  222.11   80.04
  -1  -2  19  490.78  158.61
  -1   2  19  367.48  123.57
  -1  -2  19  258.23  148.87
  -1   2  19  277.56  127.34
  -1   2 -19   34.53  122.87
  -1   2 -19  195.33  132.68
  -1  -2 -19  -52.42  133.15
   1   2 -19  131.98  130.50
   1  -2 -19  505.47  166.52
  -1  -2 -19   39.29  138.13
   1  -2 -19  280.75  146.46
   1  -2  19  156.55  126.84
   1   2  19  103.61  112.51
  -1  -2  20  162.42  138.87
  -1   2  20   60.85  102.53
  -1  -2  20   16.34   62.85
  -1   2 -20  218.64  121.87
  -1  -2 -20  190.84  118.41
   1   2 -20  214.02  127.68
   1  -2 -20  211.64  114.88
   1  -2  20   31.11  107.12
  -1   3   052843.56 1013.29
   1   3   054747.13  949.50
  -1   3   053155.06  998.98
   1   3   056648.92  925.89
  -1  -3   050993.84  938.29
  -1   3   051613.99  976.34
  -1   3   054734.47  991.85
   1   3   052955.76  983.41
  -1  -3   052427.72  860.40
  -1   3   056892.93  923.02
  -1  -3   055995.71 1026.42
   1  -3   053806.57  949.48
  -1  -3   053055.15  977.86
   1  -3   053154.71  983.58
  -1  -3   051573.58  969.45
   1  -3   056424.17  950.84
   1   3   120473.00  457.95
  -1   3  -119653.06  520.06
   1   3   121108.35  458.65
  -1   3   118752.58  798.46
  -1   3  -118814.07  506.39
  -1  -3   119160.63  537.13
  -1   3   120356.40  558.06
  -1   3  -120974.36  531.70
   1   3   118229.67  519.66
  -1   3   120124.04  478.71
  -1   3  -118147.99  479.16
   1   3  -118237.49  515.32
   1   3   119475.86  477.52
  -1  -3  -119377.46  416.88
  -1   3  -121018.44  464.05
   1   3  -119817.98  444.02
   1  -3  -119737.97  441.26
  -1  -3   120647.78  391.39
  -1  -3  -119052.61  461.20
   1  -3  -120117.26  505.39
   1  -3   119135.33  440.00
  -1  -3  -119716.49  690.54
  -1  -3   118740.58  474.08
   1  -3  -119170.06  488.50
   1  -3   119221.75  515.65
  -1  -3  -118702.75  492.77
   1  -3  -120605.88  446.98
  -1  -3   118970.50  504.07
   1  -3   119771.49  465.50
  -1  -3   2121021.5 2023.43
  -1   3   2121337.5 1964.71
   1   3   2128871.2 1948.71
  -1   3  -2121830.6 1989.70
   1   3   2126627.2 1880.12
  -1   3   2121971.0 1970.02
  -1   3  -2120534.9 2053.31
   1   3  -2129029.4 1993.40
  -1  -3   2121966.7 1950.21
  -1   3   2123415.3 2009.82
  -1   3  -2123148.1 1931.02
   1   3   2132756.4 2130.87
  -1   3   2130044.0 1980.86
  -1   3  -2131273.8 2100.12
   1   3  -2118177.4 1965.14
   1   3   2132639.7 1995.21
  -1   3  -2128638.6 1966.62
  -1  -3  -2126859.1 1925.95
   1   3  -2122030.8 1871.37
   1  -3  -2127630.7 1957.08
  -1   3  -2122074.1 1832.93
  -1  -3  -2124355.8 2014.71
   1  -3  -2118866.9 1899.72
   1   3  -2126139.0 1824.31
  -1  -3  -2124218.4 2019.32
  -1  -3   2123862.0 1906.71
   1  -3  -2119945.9 1918.65
   1  -3   2125242.1 1996.38
   1  -3  -2131550.3 2010.77
  -1  -3  -2125727.5 2010.33
  -1  -3   2127412.6 2036.54
   1  -3   2125022.1 1960.34
  -1  -3   3116713.4 1879.12
   1   3   3122432.6 1885.98
  -1   3   3119826.6 1986.38
  -1   3  -3116127.3 1939.70
   1   3   3122919.2 1857.05
  -1   3   3119386.4 1955.56
  -1   3  -3116213.2 1941.03
   1   3  -3119258.7 1917.38
  -1  -3   3117033.7 1942.02
  -1   3   3121000.0 2000.58
  -1   3  -3125132.9 1947.86
   1   3   3117790.3 1924.57
  -1   3   3125074.6 1909.33
  -1   3  -3118412.4 1962.22
   1   3  -3117194.7 1995.50
  -1  -3  -3121256.1 1902.09
  -1   3  -3121371.5 1918.79
   1  -3  -3114902.1 1821.21
   1   3  -3120711.0 1899.56
  -1   3  -3125852.3 1934.11
  -1  -3  -3117913.9 1922.12
   1  -3  -3116016.6 1904.54
  -1  -3  -3119263.4 2123.43
  -1  -3   3119447.6 1814.06
   1  -3  -3124359.3 2008.03
   1  -3   3117700.8 1920.83
  -1  -3  -3117042.6 1914.03
  -1  -3   3116626.1 1918.26
   1  -3   3117346.6 1913.49
  -1   3   3113939.5 1747.73
   1  -3   482652.33 1485.10
  -1  -3   481914.78 1454.55
   1   3   484600.13 1461.88
  -1   3   481038.83 1471.32
   1   3   485743.14 1424.15
  -1   3   483474.76 1509.32
  -1   3  -481429.06 1496.14
   1   3  -483453.56 1480.12
  -1  -3   484996.82 1494.15
  -1   3   478776.72 1455.63
  -1   3  -480137.63 1333.80
   1   3   486431.65 1508.73
  -1   3   488874.64 1397.17
  -1   3  -480114.93 1479.06
   1   3  -481747.39 1545.35
  -1   3  -485649.37 1485.48
  -1  -3  -483136.70 1447.30
   1   3  -486126.90 1484.23
   1  -3  -485402.25 1483.22
  -1   3  -484877.67 1462.04
  -1  -3  -482382.85 1489.56
   1   3  -488204.25 1390.91
   1  -3  -482382.75 1492.96
  -1  -3  -484648.50 1546.52
   1  -3  -486188.38 1744.77
   1  -3   483995.55 1483.08
  -1  -3  -479746.61 1453.70
  -1  -3   485110.67 1546.81
   1  -3   480654.09 1464.89
  -1   3   485682.51 1404.33
   1  -3   5 2143.21  532.13
  -1  -3   5 1686.57  501.56
   1   3   5 1493.73  533.52
  -1   3   5 2177.47  243.11
  -1   3   5 1664.66  606.90
  -1   3  -5 2117.12  277.18
   1   3  -5 1959.15  250.06
  -1  -3   5 1729.68  581.04
  -1   3   5 1594.75  253.21
   1   3   5 2019.11  215.10
  -1   3  -5 1189.32  127.95
  -1   3   5 1348.21  424.68
  -1   3  -5 1306.38  241.75
   1   3  -5 1572.32  224.76
  -1  -3  -5 1269.06  484.79
  -1   3  -5 1450.95  406.66
   1   3  -5 1808.01  250.22
   1  -3  -5 1530.17  189.03
  -1   3  -5 1713.48  489.74
  -1  -3  -5 1456.46  584.97
   1   3  -5 1923.50  159.76
   1  -3  -5 1498.58  223.12
  -1  -3  -5 1630.53  539.08
   1  -3  -5 1641.95  561.23
  -1  -3   5 1530.37  223.25
   1  -3   5 1526.56  237.66
  -1  -3   5 1496.87  509.26
   1  -3   5 1177.87  214.51
  -1   3   5 1552.32  166.35
   1   3   5 1648.30  210.64
   1  -3   622764.37  926.01
  -1  -3   621910.19 1218.25
   1   3   621907.52  861.35
  -1   3   620824.72  878.50
  -1   3   620413.25  866.19
  -1   3  -620541.92  853.33
   1   3  -620199.21  849.46
  -1  -3  -620776.83  801.60
  -1  -3   622253.98 1072.23
  -1   3   620139.63  832.09
   1   3   624952.50  926.95
  -1   3  -619592.34  855.85
   1   3  -622408.62  953.67
  -1   3  -622124.20  874.58
  -1  -3  -620473.65  842.77
   1   3  -624471.27  958.31
   1  -3  -621119.94  841.09
  -1   3  -622754.79  853.33
  -1  -3  -621827.29  911.26
   1   3  -623552.06  857.20
   1  -3  -621908.80  925.92
  -1  -3  -622223.61  896.73
   1  -3  -622754.30 1315.30
   1  -3   621443.20  868.35
  -1  -3   619258.67  804.09
   1  -3   619937.74  857.39
  -1   3   621433.24  815.92
   1   3   622478.22  911.32
   1  -3   714059.27  654.37
  -1  -3   712693.03  598.71
   1   3   714220.77  663.04
  -1   3   713144.01  628.46
  -1   3   713596.25  647.27
  -1   3  -714282.66  675.27
   1   3  -714091.13  663.11
  -1  -3  -714295.20  605.59
  -1  -3   714222.04  617.44
  -1   3   714280.67  640.15
   1   3   715837.22  632.23
  -1   3  -716260.92  708.99
   1   3  -714658.97  716.10
  -1   3  -713540.59 1082.14
  -1  -3  -713865.00  634.71
   1   3  -714727.00  643.10
   1  -3  -714735.41  635.14
  -1   3  -714747.93  884.46
   1   3  -713666.18  781.34
  -1  -3  -714199.13  638.89
   1  -3  -714146.75  768.80
   1  -3   715253.08  645.03
  -1  -3   712800.55  627.95
   1  -3   713916.43  675.37
  -1   3   714951.92  626.63
   1   3   713774.25  643.68
   1  -3   8 4615.61  391.83
  -1  -3   8 4166.17 1005.68
   1   3   8 3787.94  309.14
  -1   3   8 3952.47  917.05
  -1   3   8 3842.58 1116.84
  -1   3  -8 4302.65  360.52
   1   3  -8 4540.39  810.51
  -1  -3  -8 4496.46  336.86
  -1  -3   8 4732.39  323.41
  -1   3   8 3274.05 1012.79
  -1   3  -8 4249.56  382.96
   1   3  -8 4192.18  367.60
  -1  -3  -8 3819.29 1211.78
  -1   3  -8 4227.57  958.25
   1   3  -8 3821.96  326.97
   1  -3  -8 4294.33  356.04
  -1   3  -8 3861.36  400.47
  -1  -3  -8 4836.26 1196.34
   1  -3  -8 4172.06  366.44
  -1  -3  -8 4227.40  355.19
   1  -3  -8 4172.24  676.82
   1  -3   8 4190.90  332.86
  -1  -3   8 4362.33  403.81
   1  -3   8 4353.30  368.17
  -1   3   8 4637.95  350.34
   1   3   8 4073.62  379.46
   1  -3   9  379.98  117.62
  -1  -3   9  549.65  172.57
   1   3   9  485.26  232.51
  -1   3   9  312.49  222.17
  -1   3   9  305.06  224.41
  -1   3  -9  740.23  272.84
   1   3  -9  484.56  200.45
  -1  -3  -9  410.29  149.99
  -1   3   9  582.76  265.89
  -1   3  -9  -34.75  188.69
   1   3  -9  111.81  240.76
  -1   3  -9  785.99  189.64
  -1  -3  -9  355.85  168.05
   1   3  -9  455.76  172.56
   1  -3  -9  768.24  231.38
  -1   3  -9  293.95  180.66
  -1  -3  -9  633.63  265.26
   1  -3  -9 1176.20  316.08
  -1  -3  -9  449.29  119.96
  -1  -3   9  652.60  191.10
   1  -3   9  605.78  201.46
  -1   3   9  612.48  170.65
   1   3   9  573.47  216.38
   1  -3  1017951.00  929.18
   1   3  1015751.05 2020.81
  -1   3  1015937.29  893.46
  -1   3 -1014102.45  851.29
   1   3 -1016978.46  930.15
  -1  -3 -1015357.10  809.31
   1  -3 -1016339.92  893.12
  -1   3  1016330.62  924.32
  -1   3 -1018521.88  944.35
   1   3 -1016071.38  910.05
  -1   3 -1015536.74  850.31
  -1  -3 -1014679.08  835.88
   1  -3 -1016971.89  907.12
   1   3 -1014704.10  816.21
  -1  -3 -1016148.76 1217.93
   1  -3 -1015035.57 1263.53
  -1  -3 -1017667.36  964.96
  -1  -3  1014051.73  816.75
   1  -3  1015775.31  869.31
  -1   3  1015651.30  823.20
   1   3  1015863.13  859.74
   1  -3  1141788.94 1387.13
  -1  -3  1144992.81 1426.50
   1   3  1142745.63 1379.15
  -1   3  1139904.61 1376.87
  -1   3 -1140567.67 1426.84
   1   3 -1139532.66 1322.57
  -1  -3 -1142422.52 1362.93
   1  -3 -1139640.41 1325.53
   1   3 -1141417.35 1364.69
  -1   3 -1139536.14 2141.67
  -1  -3 -1143158.02 2079.30
   1  -3 -1140175.80 1879.97
   1   3 -1141908.68 1361.77
  -1  -3 -1140270.69 1918.32
   1  -3 -1140153.88 1366.13
  -1  -3  1141414.78 1377.87
   1   3  1139114.87 1296.91
   1  -3  1218526.33 2067.55
  -1  -3  1213675.80 3290.45
  -1   3  1218971.61 1541.56
  -1   3 -1218373.10 1541.70
   1   3 -1219915.93 1614.81
   1  -3 -1218769.10 1531.25
  -1  -3 -1217560.02 3839.72
  -1   3 -1218147.10 3534.90
   1   3 -1220122.96 1633.78
   1  -3 -1218496.31 1528.92
  -1  -3 -1218264.08 1858.01
   1  -3 -1218461.17 3834.79
  -1  -3  1220726.49 1704.12
   1  -3  1218858.61 1553.83
   1   3  1218378.62 1515.17
   1  -3  1218107.67 2634.27
  -1  -3  1215773.96 1308.45
  -1   3  1216847.23 1348.17
   1  -3  1219443.76 2281.60
  -1  -3  1216483.24 1379.85
  -1   3  1218387.35 3088.73
  -1   3 -1214672.24 1912.61
  -1  -3 -1214305.04 2030.27
   1  -3 -1215567.95 1280.26
   1   3 -1217961.39 1422.19
  -1  -3 -1215535.95 1276.33
   1  -3 -1216437.32 1335.52
  -1  -3 -1213097.45 2226.04
  -1  -3  1218162.83 1936.72
   1  -3  1216028.95 1330.88
   1  -3  13 1468.55  693.79
  -1  -3  13 2388.69  995.56
  -1   3  13 1552.68  524.56
  -1   3 -13 1296.45  461.53
   1   3 -13 2032.18  848.36
   1  -3 -13 3602.01  646.03
  -1   3 -13 2589.39  577.28
  -1  -3 -13 1836.32  537.93
   1  -3 -13 1847.93  442.63
   1   3 -13 2371.40  488.10
  -1  -3 -13 2317.69  494.34
   1  -3 -13 2191.97  407.19
  -1  -3  13 1368.86  741.30
   1  -3  13 1989.95  549.51
   1   3  13 1785.69  482.48
   1  -3  13 2688.76  496.93
  -1  -3  13 1993.80  441.36
  -1   3  13 1744.08  359.56
   1  -3  13 2359.03  621.48
  -1  -3  13 1765.07  646.64
  -1   3  13 2654.81  505.72
  -1  -3 -13 1605.67  321.98
  -1   3 -13 2363.02  420.86
   1  -3 -13 1910.66  393.33
   1   3 -13 1590.61  314.41
  -1  -3 -13 2250.77  394.82
   1  -3 -13 2587.97  459.61
  -1  -3 -13 2228.15  491.04
  -1  -3  13 2530.30  458.31
   1  -3  1410247.75 1476.67
  -1  -3  1410932.09 2308.97
  -1   3  1410300.25  661.94
   1  -3  14 9581.32 2295.08
  -1  -3  14 8396.25 1231.18
  -1   3  1410735.06 1603.80
  -1  -3 -1410261.20  663.56
  -1   3 -14 8833.09  605.89
   1  -3 -14 9198.75 1506.36
   1   3 -1412424.08 1919.47
  -1  -3 -14 9946.72  664.08
   1  -3 -1410299.09  656.78
  -1  -3 -1411585.94 1926.04
  -1  -3  14 9444.13  644.27
   1  -3  14 9590.39  698.31
   1  -3  15  607.04  165.91
  -1  -3  15  414.57  174.41
  -1   3  15  417.89  221.71
   1  -3  15  180.96  204.12
  -1  -3  15  454.79  216.92
  -1   3  15  282.87  228.31
  -1  -3 -15  296.30  241.23
  -1   3 -15  480.10  209.14
   1   3 -15  226.61  206.63
   1  -3 -15  329.12  251.19
  -1  -3 -15  350.26  243.51
   1  -3 -15  154.46  231.02
  -1  -3 -15  131.03  127.02
  -1  -3  15  450.44  264.26
   1  -3  15  441.87  230.02
   1  -3  16 7192.60 1397.54
  -1  -3  16 6917.84 1152.58
  -1   3  16 7213.65  548.51
   1  -3  16 7270.78 1069.17
  -1  -3  16 7454.10  761.85
  -1   3  16 7592.24 1016.85
  -1   3 -16 5804.88  434.36
  -1  -3 -16 7674.15  600.89
   1  -3 -16 6591.32  819.17
   1   3 -16 8523.06 1098.58
  -1  -3 -16 6219.63  495.87
   1  -3 -16 7562.06  925.78
  -1  -3  16 5743.58  478.76
   1  -3  16 6916.89  524.56
   1  -3  17  635.91  281.83
  -1  -3  17  854.00  267.95
  -1   3  17 1164.84  288.01
   1  -3  17 1241.63  310.19
  -1  -3  17 1175.80  288.35
  -1   3  17  975.16  227.50
  -1   3 -17  746.85  209.59
  -1  -3 -17  460.77  164.51
   1  -3 -17 1017.16  195.33
   1   3 -17 1249.94  232.67
  -1  -3 -17  541.77  187.38
   1  -3 -17 1139.32  285.94
  -1  -3  17  714.09  217.28
   1  -3  17 1196.39  283.88
   1   3  17  547.25  164.07
  -1  -3  18 1954.56  615.17
   1  -3  18 1193.42  332.35
  -1   3  18 1599.92  497.97
  -1  -3  18 1653.57  299.53
  -1   3  18 1679.07  483.56
  -1   3 -18 1598.18  229.94
  -1  -3 -18 1448.04  504.15
   1  -3 -18 1298.33  222.23
   1   3 -18 1059.36  207.27
  -1  -3 -18 1262.62  229.79
   1  -3 -18 1553.40  276.06
  -1  -3  18 1026.15  187.64
   1  -3  18 2076.56  320.41
   1   3  18 1368.44  241.47
   1  -3  19  534.24  184.50
  -1  -3  19 1435.14  281.94
  -1   3  19  788.07  242.29
  -1  -3  19 1001.14  299.75
  -1   3  19  517.52  221.17
  -1   3 -19  965.49  217.63
  -1  -3 -19  672.96  156.04
  -1   3 -19  607.13  200.30
   1   3 -19  818.37  167.78
   1  -3 -19  452.47  272.52
  -1  -3 -19  881.08  197.76
   1  -3 -19  733.48  227.37
   1  -3  19 1022.22  221.18
   1   3  19  219.27  138.17
  -1  -3  20 1237.93  300.08
   1   3 -20 1608.97  322.45
  -1   3 -20 1515.60  326.17
   1   3 -20 1332.45  298.86
   1  -3  20  445.21  243.14
  -1   4   038695.68  853.98
   1   4   039557.62  788.75
  -1   4   038974.33  856.42
   1   4   041449.40  783.35
  -1   4   039368.58  875.09
   1   4   042522.99  963.83
  -1   4   039884.36  838.18
   1   4   039536.48  843.05
  -1  -4   041993.75  751.66
   1  -4   039469.14  766.42
  -1  -4   039728.68  876.10
  -1  -4   039009.87  846.29
   1  -4   041113.71  804.06
  -1   4   1 3570.43  243.04
   1   4   1 3639.93  216.24
  -1   4  -1 3147.08  281.38
   1   4  -1 3164.79  212.44
   1   4   1 3741.64  252.91
  -1   4   1 3634.39  847.50
  -1   4  -1 2997.55  226.94
   1   4  -1 3352.03  214.17
  -1  -4   1 2811.82  237.72
  -1   4   1 3342.11  289.92
  -1   4  -1 2860.43  211.01
   1   4   1 3303.93  280.75
  -1   4   1 3974.27  245.44
  -1   4  -1 3324.44  248.13
   1   4   1 3156.51  210.88
   1   4  -1 3010.14  241.36
  -1   4  -1 3424.21  275.73
  -1  -4  -1 3564.39  170.86
   1   4  -1 3801.70  162.30
   1  -4  -1 3485.00  160.34
  -1  -4   1 3236.89  226.37
  -1  -4  -1 3425.66  343.57
   1  -4  -1 3072.89  190.52
   1  -4   1 3455.00  189.98
  -1  -4  -1 3219.49  284.77
  -1  -4   1 3219.12  245.57
   1  -4  -1 2989.42  218.22
   1  -4   1 2906.81  272.05
  -1  -4  -1 3283.27  235.39
   1  -4  -1 3113.64  181.10
  -1  -4   1 2929.61  613.66
   1  -4   1 3104.57  200.22
   1   4   218551.47  482.43
  -1   4   218826.87  568.67
  -1   4  -217096.57  561.78
   1   4   219483.95  554.32
  -1   4   218729.30  582.65
  -1   4  -218099.86  562.65
   1   4  -220266.21  529.96
  -1  -4   218856.55  565.07
  -1   4   218899.39  595.68
  -1   4  -217207.88  532.25
   1   4   218206.09  574.04
  -1   4   219630.40  514.39
  -1   4  -218590.19  565.09
   1   4   220106.15  491.83
   1   4  -217459.56  574.47
  -1  -4  -218984.46  462.01
   1  -4  -220621.71  476.32
  -1  -4  -219271.85  515.72
   1  -4  -218692.67  519.40
   1  -4   219603.75  458.78
  -1  -4  -217143.92  525.62
  -1  -4   218852.31  505.64
   1  -4  -217940.97  535.30
   1  -4   218211.63  547.68
   1  -4  -218912.36  495.25
  -1  -4  -217961.21  534.29
  -1  -4   218260.96  571.22
   1  -4   219178.85  528.88
  -1  -4   387443.78 1522.45
   1   4   393294.63 1561.62
  -1   4   389493.58 1620.47
  -1   4  -388129.62 1612.74
   1   4   389871.57 1457.71
  -1   4   387373.57 1583.45
  -1   4  -392904.01 1681.56
   1   4  -389042.82 1555.55
  -1  -4   387800.28 1578.75
  -1   4   386726.05 1602.69
  -1   4  -394757.24 1629.27
   1   4   391270.55 1659.82
  -1   4   395030.95 1546.63
  -1   4  -390320.22 1637.37
   1   4   395278.88 1458.04
   1   4  -391198.36 1694.97
  -1   4  -393372.43 1560.32
  -1  -4  -394574.00 1545.24
   1   4  -396284.10 1572.55
   1  -4  -390637.49 1500.66
  -1  -4  -388436.93 1682.82
   1  -4  -389749.68 1584.91
  -1  -4  -393228.35 1690.59
  -1  -4   391399.38 1559.25
   1  -4  -395159.77 1688.82
   1  -4   388566.73 1568.96
  -1  -4  -384659.94 1597.35
   1  -4  -393134.29 1536.34
  -1  -4   393324.89 1662.19
   1  -4   390041.06 1584.56
  -1  -4   461264.60 2007.12
   1   4   460566.52 1955.87
  -1   4   461246.14 2039.19
  -1   4  -458425.51 1975.32
   1   4   464163.01 2043.96
  -1   4   460178.69 2008.54
  -1   4  -458372.29 1961.70
   1   4  -461229.20 2008.61
  -1  -4   461821.54 2031.97
  -1   4   460144.00 2013.70
   1   4   463617.21 2102.52
  -1   4  -460214.08 1946.74
  -1   4   467537.24 2118.50
  -1   4  -458199.15 1960.37
   1   4  -460490.88 2052.84
  -1  -4  -460377.87 2082.17
  -1   4  -462267.45 2005.84
   1  -4  -461425.62 1976.94
   1   4  -460704.01 1959.43
  -1   4  -462923.95 1971.80
  -1  -4  -459319.35 1964.90
   1  -4  -458350.18 1941.20
  -1  -4  -459196.12 1984.89
  -1  -4   460781.44 1925.45
   1  -4  -460203.71 2145.61
   1  -4   461374.03 2010.22
  -1  -4  -458850.47 2022.62
  -1  -4   459915.92 1998.51
   1  -4   459243.49 1962.37
  -1   4   461211.43 1953.65
   1  -4   541267.01 1457.98
  -1  -4   543516.55 1678.09
   1   4   543304.65 1465.04
  -1   4   540830.28 1451.69
   1   4   543571.70 1452.44
  -1   4   542015.97 1484.71
  -1   4  -542214.66 1513.15
   1   4  -543674.41 1524.43
  -1  -4   544004.08 1552.19
  -1   4   541785.06 1488.15
   1   4   542945.94 1509.31
  -1   4  -542299.56 1429.26
  -1   4  -542993.66 1535.62
   1   4  -542289.19 1534.56
  -1  -4  -546270.08 1591.80
  -1   4  -544551.80 1599.05
   1   4  -543844.85 1489.71
   1  -4  -543735.36 1501.69
  -1   4  -546412.06 1512.19
  -1  -4  -544507.32 1607.91
   1  -4  -545170.16 1585.89
  -1  -4  -543608.60 1628.39
  -1  -4   545128.84 1464.38
   1  -4  -542918.34 1580.60
   1  -4   541928.79 1465.22
  -1  -4   541575.77 1476.74
   1  -4   544313.82 1551.84
  -1   4   543061.40 1440.46
   1   4   543428.22 1530.06
   1  -4   613088.67  607.94
  -1  -4   613187.63  639.93
   1   4   613287.12  741.68
  -1   4   612154.01  618.73
   1   4   614534.36 1257.69
  -1   4   613980.17 1135.02
   1   4  -613659.27  626.90
  -1  -4   613299.49  610.46
  -1   4   613017.25  621.00
   1   4   613993.60  612.24
  -1   4  -613397.92  629.37
   1   4  -613214.33  656.80
  -1   4  -613920.57  636.81
  -1  -4  -613541.17  602.64
   1   4  -613876.92  648.73
   1  -4  -612427.82  578.64
  -1   4  -613664.37  621.06
  -1  -4  -613984.70  642.32
   1  -4  -613194.44  634.61
  -1  -4  -611372.18  688.80
   1  -4  -613033.19  592.24
   1  -4   612627.29  579.38
  -1  -4   613430.96  688.27
   1  -4   614451.27 1102.63
  -1   4   612765.64  537.77
   1   4   612069.69  574.23
   1  -4   731707.20 1154.58
  -1  -4   731155.91 1191.02
   1   4   732579.52 1126.46
  -1   4   734443.44 1250.91
  -1   4   730107.91 1397.05
   1   4  -731994.57 1151.77
  -1  -4  -732606.66 1104.14
  -1  -4   735943.71 1486.45
  -1   4   733709.09 1204.27
   1   4   737297.42 1248.31
  -1   4  -734916.11 1405.89
   1   4  -733464.76 1258.35
  -1   4  -735872.14 1251.87
  -1  -4  -735800.35 1242.63
   1  -4  -731624.95 1114.46
   1   4  -735008.64 1215.59
  -1  -4  -734004.42 1250.78
   1  -4  -729799.59 1131.36
  -1  -4  -732581.80 1181.89
   1  -4  -735206.61 1358.70
   1  -4   734783.40 1203.34
  -1  -4   734238.51 1234.69
   1  -4   733499.96 1236.06
  -1   4   735086.53 1176.54
   1   4   731490.37 1149.36
   1  -4   818746.96  846.72
  -1  -4   819908.25  935.21
   1   4   818624.02 1109.79
  -1   4   818971.43  957.33
  -1   4   816862.63 1240.48
  -1   4  -816645.50  806.56
   1   4  -817354.65  837.36
  -1  -4  -817165.08  744.58
  -1  -4   820658.95  904.16
  -1   4   818092.10  837.18
  -1   4  -817563.46  833.14
   1   4  -818370.99  890.46
  -1   4  -819628.38  976.24
  -1  -4  -817790.84  820.69
   1  -4  -817972.70  806.62
   1   4  -818331.00  831.60
  -1  -4  -820259.29  917.40
  -1  -4  -819054.91  904.95
   1  -4  -819535.20  838.82
   1  -4   818329.43  809.24
  -1  -4   817012.21  810.40
   1  -4   816743.72  830.92
  -1   4   819700.69  819.74
   1   4   818229.71  838.36
   1  -4   9 5063.02  996.84
  -1  -4   9 4733.09  436.40
   1   4   9 4277.45  357.53
  -1   4   9 4913.55 1323.72
  -1   4   9 4112.50 1038.86
  -1   4  -9 4638.79  489.78
   1   4  -9 5192.64  444.53
  -1  -4  -9 4972.02  416.89
  -1   4   9 4972.24 1361.52
  -1   4  -9 5054.86  451.63
   1   4  -9 5659.07  506.58
  -1  -4  -9 4230.01 1097.19
  -1   4  -9 4312.39 1181.87
   1  -4  -9 4281.75 1413.00
   1   4  -9 5960.32  496.42
  -1  -4  -9 5843.05 1438.26
   1  -4  -9 4436.01 1069.05
  -1  -4  -9 5078.99 1546.14
  -1  -4   9 4102.57 1056.51
   1  -4   9 5082.22  507.35
  -1   4   9 5040.52  414.64
   1   4   9 5780.93  484.24
   1  -4  1014901.39  788.29
  -1  -4  1014422.74  741.38
   1   4  1012980.59  851.53
  -1   4  1014600.98 1141.32
  -1   4  1012475.49  675.26
  -1   4 -1014395.65  754.18
   1   4 -1014278.83  735.52
  -1   4  1015984.97  774.52
  -1   4 -1016110.24  834.29
   1   4 -1014210.31  761.79
  -1  -4 -1012356.44  683.54
  -1   4 -1014709.15  737.61
   1   4 -1014647.48  717.61
   1  -4 -1012677.03  692.54
  -1  -4 -1013932.08 2956.13
   1  -4 -1014085.90 1722.80
  -1  -4 -1016065.01  791.19
  -1  -4  1014773.74  751.57
   1  -4  1014976.67  882.35
   1   4  1012697.32  695.94
   1  -4  1122809.45 2969.69
  -1  -4  1126205.89 1389.03
  -1   4  1123308.77 1657.04
  -1   4 -1124734.19 1150.42
   1   4 -1124180.32 1073.85
   1  -4 -1126278.15 1087.43
  -1   4 -1126970.54 1121.60
   1   4 -1122993.09 1025.90
  -1   4 -1131452.16 2592.01
  -1  -4 -1124419.48 1992.53
   1  -4 -1123359.95 1009.17
   1   4 -1124455.37 1099.56
  -1  -4 -1124668.83 1073.01
   1  -4 -1126388.37 2095.13
  -1  -4  1124299.40 1048.41
   1  -4  1123684.93 1024.32
   1   4  1126173.15 1091.45
   1  -4  12 4869.89 1424.92
  -1   4  12 4907.92 1743.77
  -1   4 -12 6037.28  789.87
   1   4 -12 6187.22  822.06
   1  -4 -12 7115.42  883.04
   1   4 -12 5808.48  821.70
  -1  -4 -12 6314.42 1253.38
  -1   4 -12 4930.29 1576.18
   1  -4 -12 6469.36  802.08
   1   4 -12 6909.71  833.92
  -1  -4 -12 6178.48 2010.81
   1  -4 -12 5393.83 1183.43
  -1  -4  12 4981.83 1196.86
   1  -4  12 5185.50  708.87
   1   4  12 6776.32  846.49
   1  -4  12 5846.97 1046.71
  -1  -4  12 4837.52 1086.18
  -1   4  12 6768.31  788.99
   1  -4  12 6309.09 1264.00
  -1  -4  12 6251.79 1267.12
  -1   4  12 5214.96  768.81
  -1   4 -12 5649.62  677.45
  -1  -4 -12 5413.96  685.44
   1  -4 -12 5007.43  689.68
   1   4 -12 6442.63  769.13
  -1  -4 -12 5613.44  699.49
   1  -4 -12 4630.34  621.62
  -1  -4 -12 6373.56 1285.87
  -1  -4  12 3840.97  531.39
   1  -4  12 5170.44  691.41
   1  -4  1316705.59 2217.37
  -1  -4  1312904.34 3064.92
  -1   4  1311887.73 1345.44
   1  -4  1313320.53 1466.84
  -1  -4  1315197.48 2870.14
  -1   4  1313349.14 2086.47
  -1   4 -1314187.49 1546.23
  -1  -4 -1312368.65 1367.87
   1  -4 -1312993.65 1439.38
   1   4 -1312542.24 1385.52
  -1  -4 -1313509.10 1484.67
   1  -4 -1311577.86 1300.29
  -1  -4 -1314794.00 2809.90
  -1  -4  1312672.23 1419.70
   1  -4  1312523.66 1398.91
   1  -4  14  376.63  165.29
  -1  -4  14  298.97  260.47
  -1   4  14  529.28  252.32
   1  -4  14  298.63  163.90
  -1  -4  14  -54.23  207.06
  -1   4  14  152.83  155.63
  -1  -4 -14  198.85  202.92
  -1   4 -14    0.06  211.84
   1   4 -14  286.63  193.69
   1  -4 -14   11.39  191.26
  -1  -4 -14  192.84  222.68
   1  -4 -14  269.60  224.38
  -1  -4 -14  404.96  276.96
  -1  -4  14  284.42  208.45
   1  -4  14  -48.79  223.65
   1  -4  15 3894.70  881.99
  -1  -4  15 3873.44  644.34
  -1   4  15 4288.22  404.13
   1  -4  15 4835.75  867.77
  -1  -4  15 4879.35  857.37
  -1   4  15 4113.73  823.45
  -1   4 -15 4390.56  407.88
  -1  -4 -15 3918.61  427.55
   1  -4 -15 2971.34  395.80
   1   4 -15 3972.12  420.62
  -1  -4 -15 4402.41  746.68
   1  -4 -15 3566.42  385.23
  -1  -4 -15 3043.75 1061.06
  -1  -4  15 2906.93  427.15
   1  -4  15 4147.31  441.27
   1  -4  1613310.27 1182.46
  -1  -4  1614327.05 1343.58
  -1   4  1613278.27  688.93
   1  -4  1614951.38 1327.11
  -1  -4  1613683.27 1803.19
  -1   4  1613213.08  940.33
  -1  -4 -1612811.97  636.85
  -1   4 -1614750.30 2053.96
   1  -4 -1612034.96  704.69
   1   4 -1613251.01  619.49
  -1  -4 -1615175.78  707.76
   1  -4 -1615360.71 1758.64
  -1  -4 -1614080.40  666.07
  -1  -4  1614402.91 1785.72
   1  -4  1612838.87  644.66
   1  -4  1711046.16 1107.04
  -1  -4  1712429.52 1960.22
  -1   4  17 9530.43  543.30
   1  -4  17 9234.65 1509.84
  -1  -4  1710484.96 1185.23
  -1   4  1710351.10 1855.34
  -1  -4 -17 6994.93 1683.85
  -1   4 -17 9355.83  855.99
   1  -4 -17 8982.45  483.05
   1   4 -17 8477.77  495.25
  -1  -4 -1711663.95  653.29
   1  -4 -1710011.50  549.58
  -1  -4  17 9468.66  530.86
   1  -4  17 9627.93  551.05
   1   4  17 9458.79  530.91
   1  -4  18 1519.59  448.24
  -1  -4  18 1732.77  547.00
  -1   4  18 1261.81  542.66
  -1  -4  18 1075.81  338.79
  -1   4  18 1185.22  308.62
  -1   4 -18 1646.69  521.03
  -1   4 -18 1117.76  225.91
  -1  -4 -18 1144.64  212.82
   1   4 -18 1340.18  242.40
   1  -4 -18  919.10  288.46
  -1  -4 -18 1927.48  293.69
   1  -4 -18 1479.25  276.30
  -1  -4  18  762.51  348.53
   1  -4  18 1078.28  251.55
   1   4  18  937.67  209.79
  -1  -4  19 4810.67  965.44
   1  -4  19 3284.98 1037.18
  -1   4  19 3273.88  863.79
  -1  -4  19 3443.53 1138.54
  -1   4 -19 4662.66  561.93
  -1   4 -19 4104.60  497.27
  -1  -4 -19 4148.44  495.70
   1  -4 -19 4748.60  558.39
   1   4 -19 2584.74  792.10
  -1  -4 -19 5167.93  614.90
   1  -4 -19 5654.39  667.93
   1  -4  19 4530.21  556.14
  -1  -4  20  999.20  369.90
   1   4 -20 1491.69  296.67
   1   5   0 6439.52  310.01
  -1   5   0 5065.53  324.61
  -1   5   0 5358.78  521.26
   1   5   0 6058.64  287.02
  -1   5   0 7099.87  406.18
   1   5   0 7314.76  395.44
  -1   5   0 5763.16  309.79
   1   5   0 5608.01  299.61
   1  -5   0 6387.85  190.62
  -1  -5   0 5455.32  362.34
   1  -5   0 6350.33  269.17
  -1  -5   0 6045.23  315.81
   1  -5   0 6000.70  328.53
  -1  -5   0 6094.23  372.19
   1  -5   0 6285.57  305.27
   1   5   116307.22  650.71
  -1   5   116039.18  689.19
  -1   5  -114613.33  664.46
   1   5  -115714.36  659.34
  -1   5   115439.92  670.83
   1   5   115893.77  604.32
  -1   5  -116481.14  723.52
   1   5  -115854.25  633.67
  -1   5  -115157.72  669.81
  -1   5   116288.05  725.72
   1   5   115171.86  691.52
   1   5  -115287.09  699.02
  -1   5   116551.81  660.32
  -1   5  -115747.47  673.60
   1   5  -115024.66  667.63
   1   5   116966.20  680.26
  -1   5  -118662.14  628.37
   1   5  -117209.34  574.09
   1  -5  -117059.83  578.74
  -1  -5  -116451.61  754.45
   1  -5  -116303.36  643.07
   1  -5   117808.64  642.26
  -1  -5  -115534.22  677.53
  -1  -5   116104.84  660.65
   1  -5  -116228.43  703.06
   1  -5   115253.99  648.50
  -1  -5  -116653.19  748.57
   1  -5  -116230.34  883.46
  -1  -5   115918.52  672.84
   1  -5   116336.59  727.36
  -1   5   2 1959.53  259.76
   1   5   2 2159.80  216.73
  -1   5  -2 1619.05  270.24
   1   5  -2 1880.52  219.76
   1   5   2 1788.39  499.17
  -1   5   2 1666.57  598.33
  -1   5  -2 1891.85  243.38
   1   5  -2 1969.13  576.84
  -1   5   2 1755.79  235.04
  -1   5  -2 2177.76  266.01
   1   5   2 1850.51  265.51
   1   5  -2 1790.73  255.41
  -1   5   2 1821.44  532.23
  -1   5  -2 2295.67  286.68
   1   5   2 2434.10  190.52
   1   5  -2 1992.97  297.32
  -1  -5  -2 2029.86  214.03
  -1   5  -2 1865.54  291.78
   1  -5  -2 2268.68  173.40
   1   5  -2 1812.88  225.01
  -1  -5  -2 2073.95  579.14
   1  -5  -2 2193.83  220.30
   1  -5   2 2100.17  160.20
  -1  -5  -2 2632.21  716.82
  -1  -5   2 2215.69  305.04
   1  -5  -2 1881.02  288.82
   1  -5   2 2343.02  292.35
   1  -5  -2 2089.39  178.01
  -1  -5  -2 2120.62  776.54
  -1  -5   2 2773.80  829.16
   1  -5   2 2005.75  539.37
   1   5   371016.96 2278.34
  -1   5   368844.39 2279.68
  -1   5  -372115.91 2394.23
   1   5  -371253.87 2334.82
   1   5   373436.43 2308.21
  -1   5   372587.05 2377.77
  -1   5  -371427.05 2372.13
   1   5  -371399.36 2323.42
  -1  -5   371807.95 2343.98
  -1   5   369507.58 2307.68
  -1   5  -369690.79 2287.43
   1   5   370522.71 2340.61
  -1   5   377771.89 2452.58
  -1   5  -367690.78 2246.89
   1   5  -371633.86 2392.16
  -1  -5  -379790.56 2484.03
  -1   5  -376931.48 2407.73
   1   5  -380296.18 2499.63
   1  -5  -374429.86 2326.54
  -1  -5  -368752.66 2358.21
   1  -5  -373318.53 2375.36
  -1  -5  -373208.85 2420.19
  -1  -5   373105.36 2345.83
   1  -5  -371495.52 2351.49
   1  -5   371123.28 2326.74
   1  -5  -373040.28 2322.22
  -1  -5  -371724.35 2349.28
  -1  -5   367970.67 2243.37
   1  -5   369668.87 2275.80
  -1  -5   4 5752.36  354.80
   1   5   4 4919.11  303.59
  -1   5   4 6396.92  458.06
  -1   5  -4 5597.77  391.66
   1   5   4 5093.12  347.65
  -1   5   4 5767.44  511.74
  -1   5  -4 6063.47  406.50
   1   5  -4 6129.06  403.80
  -1  -5   4 7344.44  442.95
  -1   5   4 5400.04  411.15
   1   5   4 7706.64  501.08
  -1   5  -4 6195.69  398.06
  -1   5  -4 5922.72  422.38
   1   5  -4 5344.31  405.82
  -1   5  -4 6154.45  368.84
  -1  -5  -4 5782.52  437.52
   1  -5  -4 5477.97  311.09
   1   5  -4 6575.25  356.05
  -1  -5  -4 5731.41  949.21
   1  -5  -4 5851.08  405.08
  -1  -5  -4 5278.61  383.06
   1  -5  -4 5194.19  353.46
  -1  -5   4 6112.75  344.54
   1  -5   4 5702.38  354.84
   1  -5  -4 5954.48  339.17
  -1  -5  -4 5205.73  372.57
   1  -5   4 6161.80  435.25
  -1  -5   5100905.6 2897.04
   1   5   5111398.5 3109.30
  -1   5   5105334.1 3023.07
   1   5   5112682.5 3111.78
  -1   5   5102596.7 2940.89
  -1   5  -5108700.0 3140.23
   1   5  -5107915.0 3076.06
  -1  -5   5112629.0 3365.10
  -1   5   5111162.5 3198.99
   1   5   5117884.1 3351.22
  -1   5  -5110848.6 3116.73
   1   5  -5107788.1 3150.54
  -1  -5  -5113295.7 3142.25
  -1   5  -5113093.2 3208.43
   1  -5  -5104420.5 2914.95
   1   5  -5121416.5 3355.36
  -1  -5  -5123508.3 3488.55
   1  -5  -5104980.2 3021.08
  -1  -5  -5112899.9 3252.80
  -1  -5   5110973.2 3152.01
   1  -5  -5110260.3 3139.56
   1  -5   5108985.4 3089.01
  -1  -5  -5107214.8 3178.00
  -1  -5   5108979.4 3321.78
   1  -5   5109026.4 3125.07
  -1   5   5111001.5 3091.14
  -1  -5   6 2391.84  687.95
   1   5   6 2192.83  439.33
  -1   5   6 2476.08  344.75
  -1   5  -6 1419.82  253.38
   1   5   6 1881.44  480.68
  -1   5   6 2197.40  593.55
  -1   5  -6 2136.96  298.99
   1   5  -6 2493.59  298.42
  -1  -5   6 2514.71  747.78
  -1   5   6 1906.70  298.13
   1   5   6 2058.31  250.78
  -1   5  -6 2396.18  314.62
  -1  -5  -6 1609.79  544.89
  -1   5  -6 2036.64  520.18
   1  -5  -6 1738.53  196.67
   1   5  -6 1684.20  199.97
  -1  -5  -6 2053.50  452.65
   1  -5  -6 2371.63  275.98
  -1  -5  -6 2823.14  651.51
   1  -5  -6 1784.97  493.02
   1  -5   6 2017.27  273.49
  -1  -5   6 2153.52  821.97
   1  -5   6 2053.26  274.98
  -1   5   6 2380.98  250.00
   1   5   6 2327.08  320.23
  -1  -5   7 6342.32  463.68
   1   5   7 5562.02 1361.54
  -1   5   7 6192.72 1208.42
   1   5   7 5731.50  383.55
  -1   5   7 5558.49  462.00
   1   5  -7 5594.17  448.19
  -1  -5   7 7121.86  499.10
  -1   5   7 5355.30  409.08
   1   5   7 6714.07  453.99
  -1   5  -7 5497.58  462.44
   1   5  -7 5563.63  460.69
  -1  -5  -7 4971.60  360.31
  -1   5  -7 5195.22 1193.54
   1   5  -7 5333.81  752.26
   1  -5  -7 5695.24  397.98
  -1  -5  -7 6000.86  469.06
   1  -5  -7 6292.94  515.46
  -1  -5  -7 6241.68 1323.13
   1  -5  -7 7092.73  550.22
   1  -5   7 4959.69  374.40
  -1  -5   7 4866.72 1466.45
   1  -5   7 6283.88  510.24
  -1   5   7 6219.49  403.28
   1   5   7 5548.26  434.09
   1  -5   8 3157.84  386.16
  -1  -5   8 4072.25 1201.48
   1   5   8 3481.59  601.02
  -1   5   8 3140.89  900.63
  -1   5   8 3038.42  926.60
  -1   5  -8 3496.55  358.61
   1   5  -8 3190.24  339.31
  -1  -5   8 3689.38  345.70
  -1   5   8 3810.80  401.61
  -1   5  -8 2924.74  392.12
   1   5  -8 2667.61  378.89
  -1  -5  -8 2482.86  679.15
  -1   5  -8 2934.22  749.76
   1   5  -8 4159.84  681.77
   1  -5  -8 3412.08  353.93
  -1  -5  -8 3449.69 1106.90
   1  -5  -8 3284.53  370.46
  -1  -5  -8 3646.32  665.52
   1  -5  -8 3194.40  865.03
   1  -5   8 3375.79  317.00
  -1  -5   8 2631.41  708.13
   1  -5   8 3714.52  366.61
  -1   5   8 2693.08  735.01
   1   5   8 3019.62  314.55
   1  -5   9 2596.92  368.83
  -1  -5   9 2991.56  833.76
   1   5   9 2148.22  488.28
  -1   5   9 2149.08  548.77
  -1   5   9 1886.39  806.71
   1   5  -9 2469.33  329.97
  -1   5   9 2113.71  350.27
  -1   5  -9 2678.05  399.58
   1   5  -9 1988.31  357.12
  -1  -5  -9 2070.12  693.55
  -1   5  -9 2049.15  484.65
   1   5  -9 2531.42  626.13
   1  -5  -9 2933.26  334.13
  -1  -5  -9 2113.43  533.94
   1  -5  -9 2808.17  776.49
  -1  -5  -9 2927.70  929.35
  -1  -5   9 2302.22  593.83
   1  -5   9 1791.78  292.36
   1   5   9 2668.95  336.18
   1  -5  10  415.39  295.17
  -1  -5  10   42.81  207.35
  -1   5  10  147.32  145.00
  -1   5 -10  294.21  221.93
   1   5 -10  538.27  243.86
  -1   5  10  161.78  214.41
  -1   5 -10  330.44  226.78
   1   5 -10  278.94  221.75
  -1   5 -10  242.71  120.36
  -1  -5 -10  452.75  232.15
   1   5 -10  209.40  232.89
   1  -5 -10  330.37  197.70
  -1  -5 -10   -3.69  235.32
  -1  -5 -10  183.24  215.77
  -1  -5  10  345.82  315.23
   1  -5  10   72.63  207.96
   1   5  10  532.68  215.02
   1  -5  1125336.75 1972.06
  -1  -5  1126057.35 2045.06
  -1   5  1124190.72 4415.40
  -1   5 -1124755.95 1992.32
   1   5 -1122215.48 1779.10
   1  -5 -1123380.68 1873.70
  -1   5 -1125595.01 2015.64
   1   5 -1123167.38 1870.11
  -1   5 -1125819.22 2863.53
  -1  -5 -1123860.77 2388.67
   1   5 -1123654.33 1877.84
   1  -5 -1123498.15 1853.82
  -1  -5 -1124714.54 2199.88
  -1  -5  1121379.04 4015.13
   1  -5  1127477.39 2127.45
   1   5  1125825.45 2031.14
   1  -5  1122467.39 1747.36
  -1  -5  1119743.13 1675.62
  -1   5  1119873.66 1537.44
   1  -5  1121133.57 1640.91
  -1  -5  1119581.00 1526.37
  -1   5  1120344.84 1746.96
  -1  -5  1117060.39 3242.98
  -1  -5 -1120403.03 1607.49
   1  -5 -1120420.05 1592.05
  -1  -5 -1120170.15 2151.21
  -1  -5  1120717.44 1619.78
   1  -5  1120737.83 1636.32
   1  -5  12 1873.94  453.83
  -1  -5  12  775.19  332.23
  -1   5  12 1160.83  346.61
  -1   5 -12  843.44  365.78
   1   5 -12 1029.29  460.53
   1  -5 -12 1498.32  461.09
  -1   5 -12 1486.93  475.24
   1   5 -12 1524.94  424.18
  -1   5 -12  471.10  300.24
   1   5 -12 1233.97  366.60
   1  -5 -12  822.13  494.68
  -1  -5  12 1326.11  418.74
   1  -5  12 1012.10  354.41
   1   5  12  954.22  303.05
   1  -5  12 1218.70  308.05
  -1  -5  12 1131.41  373.52
  -1   5  12 1274.50  305.60
   1  -5  12 1561.57  404.16
  -1  -5  12 1921.82  392.08
  -1   5  12 1608.50  340.48
  -1  -5  12  918.59  227.80
  -1   5 -12  845.53  257.37
  -1   5 -12  564.47  199.82
  -1  -5 -12 1021.58  297.39
   1   5 -12 1474.57  344.57
   1  -5 -12  466.99  255.50
  -1  -5 -12  977.77  277.84
   1  -5 -12 1199.94  404.94
  -1  -5 -12 1281.26  267.14
  -1  -5  12 1139.58  323.74
   1  -5  12 1000.22  408.05
   1  -5  13 2809.23  536.58
  -1  -5  13 2724.84  786.06
  -1   5  13 2603.67  392.02
   1  -5  13 2611.72  321.15
  -1  -5  13 2783.35  697.22
  -1   5  13 2171.18  311.36
  -1  -5  13 1805.27  607.64
  -1   5 -13 2224.58  325.77
  -1  -5 -13 2165.68  409.28
   1   5 -13 2711.50  383.35
   1  -5 -13 2462.64  398.05
  -1  -5 -13 2021.89  311.36
   1  -5 -13 2639.06  384.54
  -1  -5 -13 2182.90  393.41
  -1  -5  13 2740.82  355.53
   1  -5  13 2838.56  400.31
   1  -5  14 6831.98 1463.97
  -1  -5  14 6868.27 1536.66
  -1   5  14 7244.05  570.06
   1  -5  14 9156.57 1031.61
  -1  -5  14 7325.52 1573.68
  -1   5  14 6786.94 1323.50
  -1  -5 -14 7414.55  605.49
  -1   5 -14 6544.02  525.78
   1  -5 -14 6417.60  565.56
   1   5 -14 6851.27  537.37
  -1  -5 -14 7289.89  575.09
   1  -5 -14 6740.96  571.33
  -1  -5 -14 7185.80 1338.51
  -1  -5  14 7348.90  572.92
   1  -5  14 6690.83  588.40
   1  -5  15 9917.10 1012.03
  -1  -5  15 9241.64 1783.85
  -1   5  15 8695.18  580.01
   1  -5  15 9050.16 1309.79
  -1  -5  15 9681.54 1822.51
  -1   5  15 7664.89 1438.03
  -1  -5 -15 7247.91  680.02
  -1   5 -15 8920.19  550.28
   1  -5 -15 9186.55  541.69
   1   5 -15 8666.54  520.22
  -1  -5 -15 9578.65  595.91
   1  -5 -15 8864.64  560.95
  -1  -5 -15 9223.55 2175.45
  -1  -5  15 8425.09  589.59
   1  -5  15 8262.41  560.52
   1  -5  16 1075.24  249.92
  -1  -5  16  834.65  299.58
  -1   5  16  804.59  211.62
  -1  -5  16 1306.67  340.72
  -1   5  16 1198.20  361.16
  -1   5 -16  807.01  197.43
  -1  -5 -16  736.26  181.08
   1   5 -16  631.07  202.56
   1  -5 -16  873.43  191.68
  -1  -5 -16 1102.13  260.91
   1  -5 -16  674.11  247.73
  -1  -5 -16  338.54  346.32
  -1  -5  16  783.60  234.37
   1  -5  16  628.55  268.89
   1  -5  17 1562.51  357.22
  -1  -5  17 1220.76  305.14
  -1   5  17  756.22  188.88
  -1   5  17 1188.97  177.87
  -1   5 -17 1365.23  280.60
  -1   5 -17 1369.58  222.97
  -1  -5 -17  606.50  173.40
   1   5 -17 1592.62  275.52
   1  -5 -17  791.02  167.23
  -1  -5 -17  936.15  225.39
   1  -5 -17 1095.60  240.77
  -1  -5  17  851.94  209.46
   1  -5  17 1913.52  331.21
   1   5  17 1024.53  254.72
   1  -5  18 5427.96  779.68
  -1  -5  18 5838.68  953.11
  -1   5  18 3857.25 1181.78
  -1  -5  18 4137.37 1301.86
  -1   5  18 2584.36  825.83
  -1   5 -18 4720.58  434.22
  -1  -5 -18 4722.88  442.97
  -1   5 -18 3119.00  656.26
   1   5 -18 2965.98  846.53
   1  -5 -18 3399.41  342.90
  -1  -5 -18 5892.99  457.49
   1  -5 -18 4571.51  420.72
  -1  -5  18 5348.29  426.41
   1  -5  18 4315.72  420.61
   1  -5  19 1064.30  409.61
  -1  -5  19 1419.84  347.95
  -1   5 -19 1500.16  316.16
   1   5 -19 2088.04  430.04
  -1  -5 -19 1125.80  311.91
   1  -5 -19 1378.21  288.97
   1  -5  19 1176.18  246.74
   1   6   0 1430.30  189.15
  -1   6   0 1570.02  313.01
   1   6   0 1420.98  397.09
  -1   6   0 1823.75  520.71
  -1   6   0 1499.04  227.09
   1   6   0 1592.72  272.98
  -1   6   0 1325.01  340.21
   1   6   0 1354.65  195.69
   1  -6   0 1224.24  147.42
  -1  -6   0 1579.70  300.72
   1  -6   0 1285.48  290.13
  -1  -6   0 1435.27  476.26
   1  -6   0 1439.97  404.39
  -1   6   1 6902.70  497.77
   1   6   1 7500.40  410.13
  -1   6  -1 7237.12  460.62
   1   6  -1 5983.65  371.41
   1   6   1 7293.77  375.54
  -1   6   1 5699.88  387.31
  -1   6  -1 7080.28  455.08
   1   6  -1 7057.43  382.18
  -1   6  -1 7554.74  494.55
  -1   6   1 6885.56  480.19
   1   6   1 7498.59  549.58
  -1   6   1 7059.49  397.58
  -1   6  -1 6330.61  386.63
   1   6   1 7874.67  431.43
   1   6  -1 6615.98  423.32
  -1  -6  -1 8264.24  400.54
   1  -6  -1 6866.41  363.18
  -1  -6  -1 6999.70  455.96
  -1  -6   1 6536.17  406.38
   1  -6  -1 6975.51  474.55
   1  -6   1 6437.37  430.73
  -1  -6  -1 7072.45  460.21
   1  -6  -1 7253.87  711.06
  -1  -6   1 7105.80  631.89
   1  -6   1 7419.87  417.36
   1   6   265862.95 2160.91
  -1   6   260883.93 2086.07
  -1   6  -267336.57 2283.75
   1   6  -269287.95 2314.34
   1   6   270262.05 2254.20
  -1   6   263761.45 2621.44
  -1   6  -263700.14 2174.77
   1   6  -268817.88 2254.90
  -1   6  -268276.35 2285.96
   1   6   266900.87 2278.56
   1   6  -261678.34 2141.16
  -1   6   269849.24 2361.94
  -1   6  -265828.38 2214.11
   1   6   267574.03 2167.72
   1   6  -268695.60 2327.89
  -1  -6  -270425.24 2270.37
   1  -6  -267441.62 2210.09
  -1  -6  -258999.46 2020.83
  -1  -6   265140.98 2168.31
   1  -6  -269225.86 2341.45
   1  -6   265448.18 2188.91
  -1  -6  -265168.75 2463.70
   1  -6  -266984.54 2246.87
  -1  -6   265874.61 2235.42
   1  -6   266194.23 2307.00
  -1   6   357443.83 1805.58
   1   6   355849.28 1686.47
  -1   6  -351695.49 1675.79
   1   6  -355642.46 1742.39
   1   6   360659.11 1770.76
  -1   6   353368.15 1717.39
  -1   6  -355411.36 1773.74
   1   6  -355265.41 1708.49
  -1   6   354939.90 1775.08
  -1   6  -353287.23 1681.81
   1   6   353559.18 1730.51
   1   6  -357157.54 1858.85
  -1   6   359307.72 1822.23
  -1   6  -358307.44 1844.45
   1   6  -355735.73 1798.38
  -1  -6  -360713.99 1822.43
   1  -6  -354988.41 1700.56
  -1  -6   353765.22 1657.27
   1  -6  -354089.65 1733.91
   1  -6   354637.90 1703.68
  -1  -6  -356889.93 2135.62
   1  -6  -360631.05 1808.93
  -1  -6   356877.38 1782.07
   1  -6   358004.72 1789.03
   1   6   418871.62  734.94
  -1   6   417034.82  742.37
  -1   6  -417103.87  763.48
   1   6  -418602.04  802.19
   1   6   418341.86  799.54
  -1   6   418897.85  838.81
  -1   6  -417474.76  771.34
   1   6  -418456.40  770.88
  -1   6   419240.98  868.67
  -1   6  -417869.12  757.79
   1   6   417868.01  837.61
   1   6  -419589.23  875.96
  -1   6  -417298.40 1253.00
   1   6  -420815.25  924.90
  -1  -6  -419107.25  784.51
   1  -6  -420351.25  844.54
  -1  -6  -419974.28  886.94
   1  -6  -418257.26 1117.57
  -1  -6   419182.37  783.96
   1  -6   419283.27  784.91
   1  -6  -419477.58  866.36
  -1  -6  -418029.56  794.96
  -1  -6   418447.22 1137.25
   1  -6   418834.62  773.85
   1   6   561131.11 1859.84
  -1   6   564745.45 2045.76
  -1   6  -559043.43 1924.62
   1   6  -559880.53 1912.77
  -1   6   556619.25 1836.10
  -1   6  -557972.90 1874.07
   1   6  -559193.51 1891.88
  -1   6   562132.97 1998.44
   1   6   563734.55 2022.33
  -1   6  -562386.22 1939.62
   1   6  -557861.37 1917.31
  -1   6  -559494.96 2063.33
   1   6  -558906.19 1917.28
  -1  -6  -564101.85 2171.78
   1  -6  -561981.71 1951.25
  -1  -6  -562330.47 2000.86
   1  -6  -564564.24 2037.94
   1  -6   558901.60 1867.10
  -1  -6  -562209.24 1963.69
   1  -6   561954.38 2041.57
  -1   6   560087.68 1826.96
  -1  -6   630890.03 1198.08
   1   6   631010.13 1150.11
  -1   6   632565.71 1254.00
  -1   6   631602.26 1792.81
  -1   6  -630033.69 1218.66
   1   6  -632028.00 1246.85
  -1   6   630788.04 1221.47
   1   6   632572.51 1270.19
   1   6  -631750.25 1308.95
   1   6  -628638.75 1183.77
  -1  -6  -630701.77 1217.88
   1  -6  -630154.05 1185.16
  -1  -6  -631371.11 1390.39
   1  -6  -630129.84 1225.13
   1  -6   632852.59 1237.41
  -1  -6   630955.42 1264.04
   1  -6   629525.66 1403.39
  -1   6   632098.83 1153.95
   1   6   631479.74 1218.66
  -1  -6   7 1556.68  257.52
   1   6   7 1740.31  765.33
  -1   6   7 1907.90  274.06
  -1   6  -7  893.47  233.92
  -1   6   7 1754.13  301.76
  -1   6  -7 1498.86  267.82
   1   6  -7 2150.49  318.59
  -1   6   7 1172.87  239.12
   1   6   7 1974.80  292.88
   1   6  -7 2083.17  328.96
  -1   6  -7 1274.88  357.46
   1   6  -7 2023.72  334.83
  -1  -6  -7 1865.39  615.02
  -1  -6  -7 1492.82  444.04
   1  -6  -7 1890.49  626.68
   1  -6   7 1797.34  262.36
  -1  -6   7 1547.83  490.90
   1  -6   7 1379.80  259.44
   1   6   7 1587.42  236.37
  -1  -6   8 1178.89  418.97
  -1   6   8 1238.48  737.12
  -1   6  -8 1936.20  409.14
  -1   6   8  548.42  203.36
  -1   6  -8  963.06  249.64
   1   6  -8 1013.36  282.31
  -1   6   8  977.03  252.44
   1   6  -8 1348.84  280.39
  -1   6  -8 1226.77  366.28
   1   6  -8 1290.64  348.57
  -1  -6  -8 1422.30  397.26
   1  -6  -8 1145.68  342.10
  -1  -6  -8 1307.72  485.46
   1  -6  -8 1121.06  311.52
  -1  -6   8  901.72  294.99
   1  -6   8  836.67  571.33
   1   6   8  756.19  213.89
  -1  -6   9  640.08  249.01
  -1   6   9  347.81  130.34
  -1   6  -9  369.02  201.32
  -1   6   9  449.18  220.58
  -1   6  -9  689.62  255.25
   1   6  -9 1024.44  309.78
  -1   6   9  466.45  247.49
  -1   6  -9 1059.61  402.10
   1   6  -9  361.44  426.97
  -1  -6  -9  283.44  264.29
   1  -6  -9  604.67  392.60
  -1  -6  -9  282.94  217.70
  -1  -6   9  464.37  288.84
   1  -6   9  415.81  190.91
   1   6   9  183.52  190.27
  -1  -6  10 4373.43 1694.01
  -1   6  10 5161.47  942.34
  -1   6 -10 3694.02  565.39
  -1   6  10 3196.05 1135.63
  -1   6 -10 3425.56  548.61
   1   6 -10 4348.10  578.03
  -1   6  10 4250.22  562.68
  -1   6 -10 4757.03  629.75
   1   6 -10 4811.57  649.66
  -1  -6 -10 3441.17 1277.87
   1  -6 -10 3704.52 1076.98
  -1  -6 -10 3807.44 1318.09
  -1  -6  10 4361.52 1414.07
   1  -6  10 3566.51 1433.23
   1   6  10 4140.70  555.35
   1  -6  10 3805.65  755.82
  -1  -6  10 3673.76  885.94
   1  -6  10 4160.71  835.05
  -1  -6  10 4530.67  803.87
  -1  -6 -10 4308.16  834.25
   1  -6 -10 3858.75  681.66
  -1  -6  10 3856.15  459.23
   1  -6  10 3675.72  466.25
  -1  -6  11  246.62  203.34
  -1   6  11  292.70  270.13
  -1   6 -11  985.83  399.47
   1   6 -11  589.18  396.30
   1  -6 -11  768.07  309.30
  -1   6 -11  745.55  403.56
   1   6 -11  535.11  369.03
  -1  -6 -11  409.57  206.99
   1  -6 -11  627.41  252.87
  -1  -6  11  409.86  306.43
   1  -6  11  282.19  322.55
   1   6  11 1119.95  374.71
   1  -6  11  523.34  200.22
  -1  -6  11  664.84  453.75
  -1   6  11  295.39  219.91
   1  -6  11  879.90  282.38
  -1  -6  11  359.85  144.62
  -1   6  11  347.03  114.19
  -1  -6  11  470.80  148.68
  -1   6 -11  331.61  230.34
  -1  -6 -11  265.15  212.31
   1  -6 -11  310.92  225.61
  -1  -6 -11  312.01  170.30
  -1  -6  11  457.96  262.00
   1  -6  11  662.82  305.84
   1  -6  12 2480.03  608.66
  -1  -6  12 2561.93  525.14
  -1   6  12 1593.96  351.75
   1  -6  12 2378.94  757.57
  -1  -6  12 2203.17  513.14
  -1   6  12 2001.25  382.10
  -1  -6  12 1652.23  395.21
  -1   6 -12 2084.91  416.26
  -1  -6 -12 2180.25  447.41
   1  -6 -12 1499.50  411.37
  -1  -6 -12 2646.06  655.32
  -1  -6  12 1554.19  383.94
   1  -6  12 1783.28  380.07
  -1  -6  13 3491.58  641.96
   1  -6  13 4885.75  826.40
  -1   6  13 4053.58  411.52
   1  -6  13 5356.77 1096.61
  -1  -6  13 5649.98 1309.56
  -1   6  13 4999.84  794.00
  -1  -6  13 4206.69  783.93
  -1   6 -13 4885.47  716.68
  -1  -6 -13 4805.05  498.33
   1  -6 -13 5153.48  466.19
  -1  -6 -13 5181.41 1066.37
  -1  -6  13 4624.47  498.76
   1  -6  13 4518.99  425.97
  -1  -6  14  520.78  194.33
   1  -6  14  311.46  231.37
  -1   6  14  484.90  206.40
   1  -6  14  868.89  267.54
  -1  -6  14  935.22  369.15
  -1   6  14  715.04  201.84
  -1   6 -14  463.05  260.09
   1   6 -14  520.09  228.45
  -1  -6 -14  542.66  231.33
   1  -6 -14  217.15  221.33
  -1  -6 -14  609.08  316.69
  -1  -6  14  513.03  204.88
   1  -6  14  297.78  179.61
   1  -6  15 3576.60  470.60
  -1  -6  15 2797.53  716.37
  -1   6  15 3376.13  420.74
  -1  -6  15 3152.44  586.84
  -1   6  15 2403.10  397.03
  -1   6 -15 2510.48  305.44
  -1  -6 -15 2963.22  436.40
   1  -6 -15 2837.65  508.14
  -1  -6 -15 2742.30  525.77
  -1  -6  15 2668.31  336.13
   1  -6  15 2405.93  315.08
   1  -6  16 1482.14  409.40
  -1  -6  16 2201.92  440.49
  -1   6  16 1962.62  333.63
  -1  -6  16 1444.31  339.84
  -1   6  16 1140.86  305.50
  -1   6 -16 1002.64  213.40
  -1  -6 -16 1793.91  334.64
   1  -6 -16 1153.13  264.91
  -1  -6 -16 1439.32  493.76
  -1  -6  16 1473.39  324.99
   1  -6  16 1232.22  237.42
   1  -6  17  346.99   94.12
  -1  -6  17  246.39  104.11
  -1   6  17  119.68  144.43
  -1   6 -17   95.24  183.87
  -1  -6 -17  310.10  173.23
   1  -6 -17   46.54  163.07
  -1  -6  17  182.76  142.82
   1  -6  17  122.98  154.65
   1  -6  18  440.32  111.69
  -1  -6  18  700.06  172.58
  -1   6  18  556.07  254.80
  -1   6 -18  634.81  166.25
   1   6 -18  643.86  169.22
  -1  -6 -18  531.21  129.00
   1  -6 -18  398.43  139.33
  -1  -6  18  468.58  193.22
   1  -6  18  342.97  146.63
  -1  -6  19 1786.51  767.77
  -1   6 -19 3731.54  685.38
   1   6 -19 3090.80  561.41
  -1  -6 -19 2910.89  529.56
   1  -6 -19 3182.39  594.04
   1  -6  19 3123.02  562.63
  -1   7   0 7072.41  512.66
   1   7   0 7624.96  466.65
  -1   7   0 7392.18  710.67
   1   7   0 6437.84  605.80
  -1   7   0 6311.89  496.14
   1   7   0 5487.19  421.47
  -1   7   0 6944.33  455.23
   1   7   0 7216.78  451.53
  -1  -7   0 6820.49  428.24
   1  -7   0 6555.50  484.46
   1  -7   0 7789.70  503.87
  -1  -7   0 7501.77  529.35
   1   7   1 3557.13  307.95
  -1   7   1 3627.98  345.56
  -1   7  -1 2998.79  330.51
   1   7  -1 3400.57  301.61
  -1   7   1 3316.68  299.99
   1   7   1 2790.01  542.49
  -1   7  -1 4659.71 1063.34
   1   7  -1 3240.71  281.01
  -1   7   1 3458.02  401.94
  -1   7  -1 3126.60  350.76
   1   7   1 2793.19  351.14
   1   7  -1 3564.04  366.84
  -1   7   1 3556.79  299.37
  -1   7  -1 3386.90  322.48
   1   7   1 3669.20  294.53
   1   7  -1 3069.80  316.63
  -1  -7   1 3700.60 1056.43
  -1  -7  -1 3945.54 1081.37
   1  -7  -1 3279.80  805.64
   1  -7   1 3280.00  375.57
  -1  -7  -1 3489.58 1054.21
   1  -7  -1 3686.72  333.09
  -1  -7   1 3172.08 1108.55
   1  -7   1 3658.63  313.02
   1   7   226220.21  965.27
  -1   7   226667.66 1044.49
  -1   7  -226310.48 1048.55
   1   7  -229583.72 1111.17
  -1   7   227072.94 1022.36
  -1   7  -228091.91 1092.23
   1   7  -228897.45 1032.81
  -1   7  -226566.28 1041.96
   1   7   229169.26 1171.46
   1   7  -227457.56 1146.95
  -1   7   229268.22 1016.49
  -1   7  -228039.13 1057.05
   1   7  -228712.25 1098.47
   1  -7  -227537.87  976.37
  -1  -7  -227374.40 1084.85
  -1  -7   227445.96 1022.59
   1  -7  -229615.09 1123.60
   1  -7   226082.00 1020.60
   1  -7  -228837.03 1922.05
  -1  -7  -226620.22 1065.08
  -1  -7   228024.52 1359.25
   1  -7   225740.02  957.02
   1   7   3 6471.86  398.05
  -1   7   3 6923.39  500.59
  -1   7  -3 5928.08  458.96
   1   7  -3 6112.90  450.48
  -1   7   3 7160.02  702.29
  -1   7  -3 7046.84  477.77
   1   7  -3 6412.19  450.84
  -1   7   3 6505.56  494.44
  -1   7  -3 6213.51  437.65
   1   7   3 6846.36  526.39
   1   7  -3 5497.40  445.07
  -1   7  -3 6903.85  496.16
   1   7  -3 7068.33  491.30
  -1  -7  -3 7462.21  501.79
   1  -7  -3 6660.69  413.70
   1  -7  -3 6483.86 1283.02
  -1  -7   3 6265.80  420.68
   1  -7   3 6845.02  453.32
   1  -7  -3 7143.29  412.44
  -1  -7  -3 6707.08  530.96
  -1  -7   3 6853.72  462.35
   1  -7   3 6046.23  427.70
   1   7   414140.97  663.60
  -1   7   414966.02  741.04
  -1   7  -416275.15  817.09
   1   7  -414478.75  736.78
  -1   7   414945.58  706.61
  -1   7  -417039.86  830.38
   1   7  -414996.12  721.15
  -1   7   415424.15  774.13
   1   7   416580.27  843.05
  -1   7  -414137.69  698.36
   1   7  -414173.04  770.05
  -1   7  -416525.78  805.84
   1   7  -415155.47  772.69
  -1  -7  -413231.52  636.61
   1  -7  -415321.77  720.05
  -1  -7  -415180.05 1028.64
  -1  -7   414960.91  693.07
   1  -7  -415612.84  776.18
   1  -7   414868.25  718.45
   1  -7  -416050.45  708.90
  -1  -7  -415119.73  740.44
  -1  -7   414309.95  709.77
   1  -7   416899.77 1698.25
   1   7   517172.57  788.62
  -1   7   516341.85  818.05
  -1   7  -514900.74  788.37
   1   7  -516504.49  815.10
  -1   7   516552.63  792.42
  -1   7  -516416.39  823.68
   1   7  -518554.33 1249.94
  -1   7   517330.94  888.96
   1   7   516169.85  814.83
  -1   7  -516741.66  806.12
   1   7  -517863.56  926.25
  -1   7  -517856.64  876.19
   1   7  -515713.46  808.66
  -1  -7  -516050.14  827.43
   1  -7  -516398.46  786.97
  -1  -7  -516676.22  903.56
   1  -7  -516785.26  840.37
   1  -7   515671.06  762.55
  -1  -7  -516769.21 1038.88
   1  -7   518256.24  851.40
  -1   7   515846.69  721.56
  -1   7   621254.13 1091.97
  -1   7  -618394.16  964.75
   1   7  -620853.08 1029.96
  -1   7   621559.46 1506.70
  -1   7  -621015.94 1041.19
   1   7  -621564.35 1060.22
  -1   7   622117.50 1089.95
   1   7   622936.49 1108.60
   1   7  -623053.76 1156.43
  -1   7  -624484.49 1163.66
   1   7  -622622.48 1125.12
  -1  -7  -622129.28 1036.49
   1  -7  -622052.94 1037.34
  -1  -7  -622394.37 1380.71
   1  -7  -624053.63 1127.10
   1  -7   620577.81  967.62
  -1  -7   619823.91 1020.25
   1  -7   622487.56 1142.97
   1   7   622449.83 1042.75
  -1   7   728129.05 1281.15
  -1   7  -728536.03 1352.06
   1   7  -728392.50 1318.35
  -1   7   728965.55 2294.19
  -1   7  -728622.37 1340.78
   1   7  -730297.38 1394.92
  -1   7   727283.33 1270.78
   1   7   732626.72 1472.14
   1   7  -729028.55 1386.35
   1   7  -724809.37 1206.05
  -1  -7  -728184.90 1334.67
   1  -7  -731685.75 1426.06
  -1  -7  -726898.16 1534.57
   1  -7  -732408.53 2139.04
   1  -7   729181.58 1286.72
   1  -7   730212.07 1538.23
   1   7   729320.72 1307.99
  -1   7   836829.21 1240.21
   1   7  -835519.76 1277.85
  -1   7   839302.09 1295.15
   1   7  -839711.46 1369.54
  -1   7  -839403.36 1374.07
  -1   7   840888.62 1378.84
   1   7  -837048.64 1357.74
  -1   7  -835823.81 1282.18
   1   7  -837167.04 1327.51
  -1  -7  -837660.62 1309.43
   1  -7  -844071.01 1424.00
  -1  -7  -838091.51 1572.38
   1  -7  -842111.26 1431.30
  -1  -7   837835.20 3176.09
   1  -7   837754.03 1376.09
   1   7   838860.77 1310.02
  -1   7   9 3509.68  775.06
  -1   7  -9 4020.49  599.40
   1   7  -9 4310.98  557.88
  -1   7   9 3064.97 1200.90
  -1   7  -9 3105.94  597.30
   1   7  -9 3655.52  554.60
  -1   7   9 3459.47  526.69
  -1   7  -9 3694.24  577.35
   1   7  -9 3856.72  617.88
  -1  -7  -9 2878.29  693.35
   1  -7  -9 3991.75 1137.85
  -1  -7  -9 2674.17  802.69
   1  -7  -9 8768.14 1401.32
  -1  -7   9 3301.06  588.61
   1  -7   9 3042.41 1111.92
   1   7   9 3979.77  509.78
   1  -7   9 2824.22  720.91
  -1  -7   9 2570.53  798.76
  -1   7  -9 2953.25  429.18
  -1  -7   9 3232.38  656.17
  -1   7  -9 2970.19  387.36
  -1  -7   9 2376.51  360.15
   1  -7   9 2623.48  427.87
  -1   7  1011575.50 2571.23
   1   7 -10 9451.98 1127.99
  -1   7 -1010488.42 1192.43
  -1   7  10 6579.07 2662.99
  -1   7 -1011064.01 1264.50
   1   7 -10 9725.46 1137.05
  -1   7  1010110.21 1180.22
  -1   7 -10 9997.17 1166.56
   1   7 -1011521.06 1282.08
  -1  -7 -1010232.99 2426.03
   1  -7 -10 9993.55 2801.36
  -1  -7 -10 7241.53 2592.66
  -1  -7  10 9657.45 2369.92
   1  -7  10 7866.78 2456.90
   1   7  1011548.55 1270.18
   1  -7  10 8208.17 1761.70
  -1  -7  10 9662.82 1428.54
  -1   7  10 8344.86  908.21
  -1  -7  10 8614.02 2005.65
  -1   7  10 8449.14 1654.99
  -1   7 -1010125.87 1092.99
  -1   7  10 9923.17 1110.89
  -1  -7  10 9931.56 1863.11
  -1   7 -10 9246.46  999.03
  -1  -7 -10 8645.11  955.81
   1  -7 -10 9895.45 1052.93
  -1  -7 -10 8690.47  961.54
  -1  -7 -10 9045.18 2196.94
  -1  -7  10 9164.37 1005.59
   1  -7  10 8679.25  971.77
  -1   7  11  393.04  360.31
   1   7  11  373.08  321.57
   1  -7  11  524.13  170.53
  -1  -7  11  799.78  306.51
  -1   7  11  517.36  248.11
  -1  -7  11  308.04  181.36
  -1   7  11  257.82  131.50
  -1   7 -11 1556.71  396.70
  -1  -7  11  857.90  268.24
  -1   7 -11  620.27  264.32
  -1  -7 -11  225.96  215.74
   1  -7 -11  573.58  234.62
  -1  -7 -11  541.43  148.82
  -1  -7 -11  270.92  171.91
  -1  -7  11  917.06  267.69
   1  -7  11  476.67  230.93
   1  -7  12 3344.78  590.73
  -1  -7  12 3684.36  762.70
  -1   7  12 3528.36  396.31
  -1  -7  12 3532.82  430.23
  -1   7  12 3178.83  747.98
  -1   7 -12 2645.76  324.02
  -1  -7  12 3147.18  568.27
  -1   7 -12 3707.60  730.46
  -1  -7 -12 3498.28  449.78
   1  -7 -12 3178.60  475.11
  -1  -7 -12 2927.06  594.97
  -1  -7  12 1882.22  345.98
   1  -7  12 2849.37  388.94
   1  -7  13  -35.83  196.85
  -1  -7  13  135.73   97.93
  -1   7  13  414.97  212.37
  -1  -7  13  298.54  128.22
  -1   7  13   11.96   93.26
  -1   7 -13  299.79  220.27
  -1  -7  13   -6.62  179.74
  -1   7 -13  220.14  158.24
  -1  -7 -13   77.44  213.96
   1  -7 -13  -18.97  210.59
  -1  -7 -13   -5.37  138.61
  -1  -7  13 -130.16  221.11
   1  -7  13   51.29  193.94
   1  -7  14  585.88  189.99
  -1  -7  14  992.84  300.75
  -1   7  14 1315.53  254.06
  -1  -7  14  526.42  430.96
  -1   7  14  611.05  298.31
  -1   7 -14  610.54  213.16
  -1   7 -14  740.47  256.40
   1   7 -14  646.25  206.24
  -1  -7 -14  790.38  243.40
   1  -7 -14  990.39  306.26
  -1  -7 -14 1112.95  258.52
  -1  -7  14 1028.96  290.54
   1  -7  14  900.34  239.80
   1  -7  15 2976.76  423.05
  -1  -7  15 2387.14  554.44
  -1   7  15 2733.62  583.06
  -1  -7  15 2352.32  716.92
  -1   7 -15 3041.82  318.41
  -1   7 -15 1791.82  299.51
   1   7 -15 2032.13  276.71
  -1  -7 -15 2936.52  376.24
   1  -7 -15 3746.85  562.59
  -1  -7  15 2103.65  274.20
   1  -7  15 2403.08  308.40
  -1  -7  16 1369.34  364.63
   1  -7  16 2117.51  330.80
  -1   7  16 1614.64  247.23
  -1   7 -16 1228.67  228.62
   1   7 -16 2021.48  300.37
  -1  -7 -16 1039.68  228.76
  -1  -7  16 1263.54  197.89
   1  -7  16 1255.66  234.61
   1  -7  17  251.33  102.09
  -1   7  17  -35.41  137.57
  -1   7 -17  150.91  161.16
   1   7 -17  246.33  153.04
   1  -7 -17  229.68   73.93
  -1  -7  17  184.30  127.93
   1  -7  18 5757.61 1336.01
   1   7 -18 6876.02 1170.69
  -1   7 -18 7303.35 1246.67
  -1  -7 -18 7613.05 1288.60
   1  -7 -18 6001.13 1029.40
  -1  -7  18 7116.96 1211.94
   1  -7  18 5922.05 1250.41
   1   8   0 2019.76  257.53
  -1   8   0 2470.79  371.00
  -1   8   0 2153.71  552.49
  -1   8   0 2306.84  336.22
   1   8   0 2400.91  374.31
  -1   8   0 2222.39  313.47
   1   8   0 2163.25  254.22
  -1  -8   0 2010.00  676.82
   1  -8   0 1969.79  356.52
  -1  -8   0 1990.54  795.38
   1  -8   0 2207.05  744.04
   1   8   1 4899.44  401.95
  -1   8   1 6674.23  524.79
  -1   8  -1 4922.63  457.92
   1   8  -1 5435.50  422.37
  -1   8   1 6203.57  446.97
  -1   8  -1 5563.53  431.78
   1   8  -1 5547.53  856.88
  -1   8   1 4804.32  447.70
  -1   8  -1 6218.80  479.65
   1   8  -1 5898.02  539.29
   1   8   1 6156.11  489.72
  -1   8   1 6533.86  462.36
  -1   8  -1 6285.54  471.98
   1   8  -1 5512.37  432.21
  -1  -8  -1 5514.81  460.11
  -1  -8   1 5838.71  449.03
   1  -8  -1 6355.03 1781.15
   1  -8   1 6140.18  542.62
  -1  -8  -1 6042.67  459.66
   1  -8  -1 5535.87  395.63
   1  -8   1 5839.59 1528.98
  -1  -8   1 6430.59 1520.02
   1   8   217464.90  803.25
  -1   8   217548.89  853.33
  -1   8  -217360.30  870.39
   1   8  -217778.31  850.36
  -1   8   217348.19  904.79
  -1   8  -220094.26  963.96
   1   8  -219920.17  885.55
  -1   8   218977.54  904.79
  -1   8  -217512.63  851.62
   1   8   217661.15  888.55
   1   8  -217121.43  878.31
  -1   8  -217733.63  822.92
   1   8  -217190.81  811.37
  -1  -8  -219757.07 1333.72
  -1  -8   218855.56  884.41
   1  -8  -217674.49 1124.22
   1  -8   218693.60  888.56
   1  -8  -217902.21  800.95
  -1  -8  -217911.89  830.97
  -1  -8   217168.57 1926.89
   1  -8   219086.98 1325.61
   1   8   3 8165.68  538.00
  -1   8   3 8989.53  605.52
  -1   8  -3 7547.28  531.71
   1   8  -310164.67  633.78
  -1   8   3 9240.47  573.17
  -1   8  -3 8526.67  573.95
   1   8  -3 8780.29  563.43
  -1   8   3 7070.05  533.33
  -1   8  -3 9281.63  605.93
   1   8   3 8788.87  638.94
   1   8  -3 8720.91  614.89
  -1   8  -3 8860.43  558.13
   1   8  -311390.42  688.74
  -1  -8  -3 9297.14  776.48
  -1  -8   3 8660.94  524.75
   1  -8  -3 9284.61  577.07
   1  -8   3 8413.09  556.15
   1  -8  -3 8095.73  779.10
  -1  -8  -3 8992.08  655.77
  -1  -8   3 8890.93  583.58
   1  -8   3 9148.08  549.55
   1   8   4 7698.20  560.08
  -1   8   4 6036.90  479.38
  -1   8  -4 5600.81  462.93
   1   8  -4 6995.32  548.39
  -1   8   4 5145.62 1177.14
  -1   8  -4 6175.92  504.52
   1   8  -4 6230.36  466.20
  -1   8   4 6166.39  535.18
  -1   8  -4 6071.09  492.35
   1   8   4 7128.53  601.46
   1   8  -4 6843.87  579.60
  -1   8  -4 7244.21  584.74
   1   8  -4 6962.28  541.45
   1  -8  -4 5753.78  447.48
  -1  -8  -4 6361.74  510.96
  -1  -8   4 5100.88 1464.76
   1  -8  -4 7200.54 1850.28
   1  -8   4 7620.60  530.68
  -1  -8  -4 5620.08 1430.57
  -1  -8   4 7158.62  538.31
   1  -8   4 7016.53  539.55
  -1   8   5 8266.87  608.10
  -1   8  -5 9931.04  700.03
   1   8  -5 9236.24  678.60
  -1   8   5 9612.09  618.15
  -1   8  -5 8551.05  616.22
   1   8  -5 9423.63  629.68
  -1   8   5 8586.82  648.41
  -1   8  -5 8991.69  628.85
   1   8   5 9318.66  654.56
   1   8  -5 9191.93  677.14
  -1   8  -510023.39  679.71
   1   8  -5 8095.58  598.37
  -1  -8  -5 7780.09 1357.24
   1  -8  -5 7537.65 1195.17
  -1  -8  -510175.77 1910.81
   1  -8  -510187.07 1981.12
   1  -8   5 8362.32  599.32
  -1  -8  -5 9867.41  667.12
  -1  -8   5 8901.75  611.38
   1  -8   5 8960.26 2068.45
  -1   8   6 8615.30  555.39
  -1   8  -6 9445.79  642.11
   1   8  -6 8799.64  613.30
  -1   8   6 9177.64 2060.29
  -1   8  -6 8840.96  610.52
   1   8  -6 8710.17  594.50
  -1   8   6 9402.46  610.54
   1   8   610861.67  726.08
   1   8  -610481.96  716.08
  -1   8  -6 8282.48  592.17
   1   8  -6 9961.03  639.76
  -1  -8  -6 9876.33 2056.81
   1  -8  -6 9561.50  641.63
  -1  -8  -6 8886.76  667.26
   1  -8  -6 9232.93 2171.64
   1  -8   6 7348.85  531.23
  -1  -8   610028.61  692.75
   1  -8   6 8557.01  612.65
   1   8   6 8621.52  571.17
  -1   8   7 3150.87  793.54
   1   8  -7 4155.35  480.68
  -1   8  -7 3499.90  474.92
  -1   8   7 3625.36 1014.06
  -1   8  -7 3214.14  403.35
   1   8  -7 2806.51  910.33
  -1   8   7 3859.79  464.33
   1   8   7 3641.11  489.82
   1   8  -7 3501.68  431.33
  -1   8  -7 4575.83  487.86
   1   8  -7 4443.42  470.51
  -1  -8  -7 3790.88  799.95
   1  -8  -7 3702.57  638.59
  -1  -8  -7 3121.96  814.78
   1  -8  -7 3560.58 1202.60
  -1  -8   7 3890.60 1263.13
   1  -8   7 2942.34 1346.25
   1   8   7 3834.81  419.62
  -1   8   8 2524.23  603.30
  -1   8  -8 2078.36  384.27
   1   8  -8 2429.36  402.62
  -1   8   8 2148.02  661.23
  -1   8  -8 2517.34  436.10
   1   8  -8 1845.65  719.48
  -1   8   8 2113.78  403.42
   1   8  -8 1560.77  351.54
  -1  -8  -8 2181.04  659.03
   1  -8  -8 1678.40  426.25
  -1  -8  -8 1823.56  639.60
   1  -8  -8 2445.95  949.65
   1  -8   8 2110.04  504.15
   1   8   8 2659.37  397.00
  -1  -8   8 1884.19  452.64
   1  -8   8 2428.88  562.40
  -1   8   8 1646.11  307.91
  -1   8  -8 2180.78  337.16
  -1   8   8 1631.74  352.75
  -1  -8   8 2756.84  481.09
  -1   8  -8 2657.94  382.61
  -1  -8  -8 1414.94  277.17
  -1  -8   8 2437.24  383.86
   1  -8   8 1556.47  284.61
  -1   8   9 8110.22 1478.72
  -1   8  -910277.88 1291.27
   1   8  -9 7984.33 1094.00
  -1   8   9 5766.58 2422.25
  -1   8  -9 8871.55 1148.41
   1   8  -9 6193.43 2563.20
  -1   8   9 8811.41 1196.03
  -1   8  -910191.22 1313.65
   1   8  -9 9637.86 1240.44
  -1  -8  -9 7899.53 2073.53
   1  -8  -9 6470.98 1471.63
  -1  -8  -9 6583.38 2660.49
   1  -8  -9 5903.53 2628.57
  -1  -8   9 8379.29 2729.08
   1  -8   9 8360.19 2514.18
   1   8   9 7801.90 1030.74
  -1  -8   9 8960.23 2026.12
   1  -8   9 7192.88 1604.26
  -1   8   9 7125.90  870.90
  -1  -8   9 7073.53 1682.55
  -1   8   9 6838.98 1302.97
  -1   8  -9 9032.68 1088.96
  -1   8   9 7213.55  899.07
  -1  -8   9 8799.90 1842.09
  -1   8  -9 6845.07  870.47
  -1  -8  -9 6401.09  850.64
   1  -8  -9 7713.88  967.01
  -1  -8  -9 8836.69 1062.78
  -1  -8  -9 7401.96 1591.78
  -1  -8   9 8216.52 1652.51
   1  -8   9 9290.42 2123.12
  -1   8  10 2863.98  783.94
   1   8 -10 3310.81 1774.47
  -1  -8 -10 3377.58  905.50
  -1  -8 -10 2893.43 1039.54
   1   8  10 4447.54  740.52
  -1  -8  10 4258.64  905.38
   1  -8  10 3892.98  647.47
  -1   8  10 3243.29  485.98
  -1  -8  10 4403.77  987.49
  -1   8  10 3521.04  799.94
  -1   8 -10 4215.01  576.78
  -1   8  10 4827.83  706.42
  -1  -8  10 3949.16  872.53
  -1   8 -10 3913.02  565.19
  -1  -8 -10 4158.79  608.53
   1  -8 -10 3236.27  484.42
  -1  -8 -10 3760.58  550.19
  -1  -8 -10 4063.77  634.72
  -1  -8  10 4902.94 1326.43
   1  -8  10 5368.98  972.83
  -1  -8  11 3207.65  690.25
   1  -8  11 2314.03  473.67
  -1   8  11 3036.14  336.53
  -1  -8  11 1641.36  512.90
  -1   8 -11 3228.55  378.31
  -1  -8  11 3081.20  625.56
  -1   8 -11 3268.58  356.66
  -1  -8 -11 3568.56  928.80
   1  -8 -11 2950.03  351.82
  -1  -8 -11 3608.35  671.56
  -1  -8 -11 2261.35  420.21
  -1  -8  11 2781.89  940.75
   1  -8  11 3404.50  654.33
   1  -8  12 2349.80  625.05
  -1  -8  12 1254.61  377.93
  -1   8  12 1553.98  254.23
  -1  -8  12 1955.99  430.34
  -1   8 -12 1636.85  312.12
  -1  -8  12 1432.63  415.21
  -1   8 -12 1590.21  367.21
  -1  -8 -12 1796.03  387.33
   1  -8 -12 1718.18  391.36
  -1  -8 -12 1082.06  639.16
  -1  -8 -12 1089.41  223.65
  -1  -8  12 1062.87  261.40
   1  -8  12 1872.70  364.49
   1  -8  1319262.20 1771.21
  -1  -8  1316452.54  860.94
  -1   8  1318180.71  719.51
   1   8 -1319017.14  803.76
  -1   8 -1316485.76  717.21
  -1   8 -1316325.14  721.31
   1   8 -1317648.01  779.18
  -1  -8 -1318271.21  771.59
   1  -8 -1316733.85  740.43
  -1  -8 -1317016.58 1598.93
  -1  -8  1316880.89  772.51
   1  -8  1317451.71  757.42
   1  -8  14 2178.07  423.69
  -1  -8  14 2766.97  784.21
  -1   8  14 2322.24  296.68
  -1   8 -14 2573.58  328.39
   1   8 -14 2802.91  307.83
  -1   8 -14 2300.59  553.92
   1   8 -14 2310.93  379.24
  -1  -8 -14 2479.78  311.97
   1  -8 -14 2465.26  364.21
   1  -8  14 3229.33  408.39
  -1  -8  14 2634.13  323.88
   1  -8  15 6325.88  968.78
  -1  -8  15 6766.56 1332.38
  -1   8  15 6542.31  430.35
  -1   8 -15 5694.56  504.38
   1   8 -15 6736.53  479.90
  -1   8 -15 5930.79  415.44
   1   8 -15 5665.34  427.25
  -1  -8 -15 5691.35  466.27
   1  -8 -15 7268.41  486.92
  -1  -8  15 6273.83  437.07
   1  -8  15 6170.87 1123.22
   1  -8  16 1022.29  259.82
  -1  -8  16 1233.37  314.09
  -1   8  16  803.06  269.13
  -1   8 -16  981.58  184.78
   1   8 -16 1241.78  253.96
   1   8 -16 1003.27  197.22
  -1  -8 -16  866.26  235.33
   1  -8 -16  953.43  247.87
  -1  -8  16 1415.41  256.33
   1  -8  16  874.14  197.81
  -1  -8  17 4185.34 1079.06
   1  -8  17 3921.65  669.11
   1   8 -17 3301.05  682.11
  -1  -8 -17 3811.53  477.09
   1  -8 -17 4132.03  517.84
   1  -8  17 4488.18  559.28
  -1  -8  17 4144.75  507.95
   1  -8  18  142.40  121.71
  -1  -8  18  202.49   77.74
  -1   8 -18  117.42  106.31
   1   8 -18   84.99  107.98
  -1  -8 -18  369.36  134.61
   1  -8 -18  300.28  124.99
   1   9   0  -86.97  174.00
  -1   9   0 -151.94  242.90
  -1   9   0   10.15   75.21
  -1   9   0  276.03  241.96
   1   9   0 -204.40  241.81
  -1   9   0  410.51  272.26
  -1  -9   0  110.46  170.06
   1  -9   0  121.11  123.43
   1  -9   0  122.11  137.90
  -1  -9   0   58.81  145.73
  -1   9   1 9473.44  658.56
   1   9   1 8649.02  599.17
  -1   9  -110549.29  701.90
   1   9  -110607.25  661.91
  -1   9   1 9839.81 2234.25
  -1   9  -110290.53  700.88
  -1   9   110006.06  693.31
  -1   9  -1 9751.53  718.65
   1   9   110951.56  762.90
   1   9  -1 9104.23  687.91
  -1   9  -1 9154.34  611.61
   1   9  -1 8888.71  600.75
  -1  -9  -1 9419.66  641.12
  -1  -9   1 8517.11  981.91
   1  -9   110720.15  699.91
   1  -9  -1 9637.85  654.56
  -1  -9  -110709.33  692.28
   1  -9  -110184.13  621.85
  -1  -9   1 8358.20  840.59
   1  -9   1 8731.50 1923.73
  -1   9   2 1594.48  281.61
   1   9   2 1600.34  251.63
  -1   9  -2 2207.86  325.93
   1   9  -2 1803.32  302.38
  -1   9   2 1541.54  482.57
  -1   9  -2 2046.78  549.48
  -1   9   2 2087.16  411.75
  -1   9  -2 1658.05  281.72
   1   9   2 1964.07  345.88
   1   9  -2 2305.35  363.19
  -1   9  -2 1508.26  335.79
   1   9  -2 1657.49  281.05
  -1  -9  -2 1646.20  433.15
  -1  -9   2 2243.82  662.17
   1  -9  -2 1083.03  814.12
   1  -9   2 2313.90  369.90
  -1  -9  -2 1493.58  748.27
  -1  -9   2 1794.17  496.33
   1  -9   2 2274.71  594.71
  -1   9   3 1808.93  353.26
   1   9  -3 1850.39  339.01
  -1   9  -3 1626.52  336.59
  -1   9   3 1418.40  817.49
  -1   9  -3 1434.84  343.67
  -1   9   3 1067.30  287.67
   1   9   3 2115.78  409.65
  -1   9  -3 1243.36  297.57
   1   9  -3 1785.60  413.79
  -1   9  -3 1944.33  345.97
   1   9  -3 1230.57  275.11
  -1  -9  -3 1520.52  239.28
  -1  -9   3 1299.67  489.55
   1  -9  -3  934.53  220.57
   1  -9   3 1222.36  480.50
  -1  -9  -3 1330.28  466.37
  -1  -9   3 1342.56  285.77
   1  -9   3 1155.50  203.93
  -1   9   4 4409.55  451.05
  -1   9  -4 4612.94  488.29
   1   9  -4 3527.36  406.63
  -1   9   4 3237.89 1030.03
  -1   9  -4 4400.76  455.03
   1   9  -4 3738.39  393.25
  -1   9   4 4719.52  512.14
   1   9   4 3666.10  449.52
  -1   9  -4 3415.41  437.14
   1   9  -4 4650.12  509.03
  -1   9  -4 4096.76  449.87
   1   9  -4 3979.35  431.99
   1  -9  -4 3401.33  682.73
   1  -9   4 4088.92  424.62
  -1  -9  -4 3990.43 1245.06
   1  -9   4 3538.72  949.71
  -1  -9   4 3644.26  917.79
  -1   9   5 6335.12  548.23
   1   9  -5 6880.04  603.09
  -1   9  -5 5581.19  506.77
  -1   9   5 6273.52 1595.69
  -1   9  -5 6296.31  559.43
   1   9  -5 6510.92  519.45
  -1   9   5 6542.49  546.05
   1   9   5 7254.72  585.93
   1   9  -5 6242.86  621.36
  -1   9  -5 5420.18  507.45
   1   9  -5 5926.52  515.92
  -1  -9  -5 7550.79 1580.98
   1  -9  -5 7711.57  620.88
   1  -9   5 6680.09  600.19
  -1  -9  -5 6959.47  803.51
  -1  -9   5 6272.55 1470.27
   1  -9   5 5690.88 1452.82
  -1   9   612357.40 1106.24
   1   9  -612020.70 1105.98
  -1   9  -611727.64 1071.53
  -1   9   6 8725.51 2445.28
  -1   9  -611916.62 1081.49
   1   9  -613297.28 1180.48
  -1   9   612285.68 1131.04
   1   9   614829.34 1323.94
   1   9  -612610.93 1177.20
  -1   9  -610893.96 1023.52
   1   9  -613158.66 1173.84
  -1  -9  -613046.94 1164.69
   1  -9  -610651.36 2780.19
   1  -9   612493.28 1108.65
  -1  -9   611325.47 2476.52
   1  -9   610279.40 2639.26
   1   9   612232.94 1099.67
   1  -9   611403.34 1180.16
  -1   9  -611586.24  997.86
  -1   9   611494.93 1002.07
  -1  -9   612088.90 2200.10
  -1   9  -610373.59  912.74
  -1  -9  -6 9702.20  874.61
  -1  -9   611583.97 1018.76
  -1   9   717724.58 2396.89
  -1   9  -718544.05 1885.81
   1   9  -719262.33 1957.45
  -1   9   716644.68 2077.42
  -1   9  -719886.84 2024.49
   1   9  -720958.44 2097.88
  -1   9   720670.44 2070.26
   1   9   720089.46 2028.23
   1   9  -720418.74 2072.92
  -1   9  -719205.52 1938.66
   1   9  -718664.33 1884.02
  -1  -9  -720526.85 2063.64
   1  -9  -720177.45 2011.17
  -1  -9   718067.13 1832.66
   1  -9   720146.32 2003.95
   1   9   719730.19 1950.97
   1  -9   717379.10 1863.06
  -1  -9   713577.13 1888.06
  -1   9   715369.96 1499.61
  -1   9  -716643.61 1630.04
  -1  -9  -716792.75 2741.63
  -1   9   716101.05 1575.45
  -1  -9   716699.28 1639.73
  -1   9  -718337.71 1779.91
  -1  -9  -717891.26 1756.68
   1  -9  -716649.38 1642.05
  -1  -9  -716391.95 1645.58
  -1  -9   718198.73 1808.10
   1  -9   716326.09 1636.03
  -1   9   8 8356.71 1678.45
  -1   9  -810791.43 1395.00
   1   9  -810782.74 1370.62
  -1   9  -811650.79 1460.63
   1   9  -811449.26 1476.83
  -1   9   810518.00 1355.45
  -1   9  -8 9725.99 1284.97
   1   9  -810465.77 1351.58
  -1  -9  -8 8198.46 2532.12
   1  -9  -8 7192.32 2881.10
  -1  -9   8 6406.67 2317.98
   1  -9   8 7814.61 1997.88
   1   9   8 9696.73 1229.34
   1  -9   8 8923.95 2177.60
  -1  -9   8 8892.87 1826.69
  -1   9   8 9084.91 1078.80
  -1   9  -8 7655.23  933.35
   1   9  -8 9950.82 1175.52
  -1  -9  -8 8200.11 1585.75
  -1   9   8 7954.84  989.00
  -1  -9   8 7922.19 1969.41
  -1   9  -8 8991.05 1091.47
   1  -9  -8 8061.29 1010.15
  -1  -9  -8 8451.13 1034.25
   1  -9  -8 9357.41 1131.11
  -1  -9  -8 8122.55  948.88
  -1  -9   8 6737.68  893.99
   1  -9   8 8830.99 1078.40
   1  -9   9 6200.01 1734.00
  -1  -9   9 7674.18 1336.64
  -1   9   9 7193.35  869.38
  -1   9  -9 7809.51 1954.70
   1   9  -9 7242.82  892.18
  -1   9   9 8027.83  959.50
  -1  -9   9 7077.05 1660.07
  -1   9  -9 7076.46  864.60
  -1  -9  -9 5831.63 1437.02
   1  -9  -9 5613.12  727.85
  -1  -9  -9 6839.81  883.76
   1  -9  -9 6693.06  829.24
  -1  -9  -9 5724.22 1240.88
  -1  -9   9 6170.56  839.88
   1  -9   9 7436.51  899.77
   1  -9  10 4578.29  985.51
  -1  -9  10 3698.43  798.85
  -1   9  10 3618.58  426.34
  -1   9 -10 3934.62  515.01
   1   9 -10 3150.35  352.55
  -1   9  10 3364.51  411.18
  -1  -9  10 4466.89  887.89
  -1   9 -10 3843.26  447.71
  -1  -9 -10 3170.93  396.77
   1  -9 -10 4120.06  437.35
  -1  -9 -10 3308.24  426.18
  -1  -9 -10 3850.25  715.07
  -1  -9  10 3714.20  457.93
   1  -9  10 4116.98  732.93
   1  -9  1138292.55 1663.69
  -1  -9  1137513.74 1685.06
  -1   9  1136286.66 1550.24
  -1   9 -1134209.14 1523.51
   1   9 -1133878.53 1523.64
  -1   9  1135049.59 1531.45
  -1  -9  1134221.64 1503.08
  -1   9 -1133004.50 1475.97
  -1  -9 -1132611.23 1789.27
   1  -9 -1131612.13 1462.91
  -1  -9 -1138452.27 2552.93
  -1  -9 -1134887.19 1655.25
  -1  -9  1136504.67 1640.46
   1  -9  1136447.29 1618.65
   1  -9  1214331.92  669.99
  -1  -9  1214575.53 2207.58
  -1   9  1213771.20  628.29
  -1   9 -1215958.44  736.64
   1   9 -1213166.27  659.30
  -1   9 -1212381.84  674.17
   1   9 -1213816.56  668.09
  -1  -9 -1214812.00  755.66
   1  -9 -1215314.20  727.28
  -1  -9 -1212242.66 2159.55
  -1  -9  1213116.77  696.68
   1  -9  1217355.36 2521.35
   1  -9  13 1940.84  428.52
  -1  -9  13 1333.61  303.59
  -1   9  13 1726.34  255.77
  -1   9 -13 1735.57  316.64
   1   9 -13 1492.64  285.02
  -1   9 -13 1415.02  269.45
   1   9 -13 1404.99  280.72
  -1  -9 -13 1543.35  287.19
   1  -9 -13 1270.66  244.79
  -1  -9 -13  961.99  329.68
  -1  -9  13 1991.29  338.50
   1  -9  13 2271.57  457.96
   1  -9  14 1876.83  339.01
  -1  -9  14 1556.45  296.18
  -1   9  14 1356.56  263.92
  -1   9 -14 1703.28  272.22
   1   9 -14 1216.69  211.42
  -1   9 -14 1825.80  339.74
   1   9 -14 1294.60  226.02
  -1  -9 -14 1959.88  286.94
   1  -9 -14 1890.36  280.61
  -1  -9  14 1659.35  408.09
   1  -9  14 1586.21  314.53
  -1  -9  15 5973.95  801.55
   1  -9  15 6584.15  948.87
  -1   9  15 3917.36 1042.16
   1   9 -15 4825.52  416.18
  -1   9 -15 4832.06  351.02
  -1   9 -15 5401.34  435.15
   1   9 -15 4403.28  320.28
  -1  -9 -15 4779.90  347.71
   1  -9 -15 5171.79  387.94
  -1  -9  15 6000.52  793.50
   1  -9  15 5317.93  424.74
   1  -9  16  825.01  167.74
  -1  -9  16  974.79  221.43
  -1   9 -16  693.21  164.56
   1   9 -16  685.86  188.57
  -1   9 -16  489.42  164.33
   1   9 -16  359.42  161.54
  -1  -9 -16  434.73  221.85
   1  -9 -16  503.24  184.92
  -1  -9  16  505.89  282.27
   1  -9  16  814.32  187.16
   1  -9  17  821.90  245.98
  -1  -9  17 1137.39  368.10
  -1   9 -17 1234.62  219.66
   1   9 -17 1588.80  335.13
  -1  -9 -17  991.25  244.67
   1  -9 -17 1299.77  292.14
  -1  -9  17 1239.59  265.88
   1  -9  17 1201.55  295.90
  -1  10   0 2301.55  358.38
  -1  10   0  856.81  312.13
  -1  10   0 2340.97  418.39
  -1 -10   0 1643.05  893.18
   1 -10   0 1666.69  438.83
  -1 -10   0 1275.97  395.51
  -1  10   1 5591.10  509.83
   1  10  -1 6704.67  546.96
  -1  10  -1 6572.41  580.16
  -1  10   1 6198.28 1496.71
  -1  10  -1 6930.86 1337.43
  -1  10  -1 7117.65  611.53
  -1  10   1 8470.21  731.11
   1  10  -1 7596.62  704.98
   1  10   1 7380.05  661.22
  -1  10  -1 6503.86  551.99
  -1 -10  -1 7310.00 2163.61
  -1 -10   1 5723.03 1812.90
   1 -10  -1 7190.71 1588.14
   1 -10   1 9174.25 2099.67
  -1 -10  -1 6403.21 1846.48
   1 -10   1 5374.09 1039.48
  -1 -10   1 6954.22 1394.75
  -1  10   2  987.24  285.01
   1  10  -2 1698.56  383.65
  -1  10   2  452.65  222.96
  -1  10  -2 1325.86  300.28
   1  10   2 1120.31  451.55
  -1  10  -2  605.58  297.47
   1  10  -2  556.03  420.14
  -1  10  -2 1554.13  376.69
   1  10  -2 1259.79  395.00
  -1 -10  -2  791.90  698.07
  -1 -10   2  848.31  226.49
   1 -10  -2  664.75  341.05
   1 -10   2  777.35  207.67
  -1 -10  -2 1025.89  373.14
  -1 -10   2  735.46  222.64
   1 -10   2  398.77  220.79
  -1  10   3  796.15  302.53
  -1  10  -3 1124.29  344.11
   1  10  -3 1015.01  331.85
  -1  10   3  556.69  253.89
  -1  10  -3  685.18  201.55
  -1  10   3  851.70  306.52
   1  10   3 1231.28  424.66
  -1  10  -3 1076.22  346.91
   1  10  -3  654.85  305.84
  -1  10  -3 1361.17  339.67
   1  10  -3 1527.94  401.72
  -1 -10  -3 1038.83  506.60
   1 -10  -3  639.87  163.54
   1 -10   3  463.82  264.32
  -1 -10  -3  518.58  183.09
  -1 -10   3  269.47  214.22
   1 -10   3 1068.09  342.47
   1 -10  -3  585.80  210.85
  -1 -10  -3  639.86  213.05
  -1 -10   3  874.00  256.61
  -1 -10  -3  651.37  285.28
   1 -10  -3  994.09  268.72
  -1 -10   3  765.36  269.91
  -1  10   4 4353.61  595.71
   1  10  -4 3425.90  568.73
  -1  10  -4 4369.38  585.14
  -1  10   4 3385.46 1004.24
  -1  10  -4 3607.46  870.45
  -1  10   4 4562.20  613.35
  -1  10  -4 4261.09  605.96
   1  10   4 4250.62  606.77
   1  10  -4 4075.04  582.13
  -1  10  -4 3246.45 1142.19
   1  10  -4 5618.46  692.12
  -1 -10  -4 4435.47  599.19
   1 -10  -4 5410.68 1232.36
   1 -10   4 3325.13  854.86
  -1 -10  -4 3547.85 1638.38
  -1 -10   4 4820.08 1421.64
   1 -10   4 4181.08  891.99
   1 -10   4 4244.89 1012.03
  -1  10   4 3854.24  473.64
  -1  10  -4 4271.07  503.07
   1 -10  -4 4384.44 1107.98
  -1 -10  -4 3670.27  872.46
  -1 -10   4 4411.83  774.11
  -1 -10   4 2691.09  801.96
  -1  10  -4 4571.23  587.46
  -1 -10  -4 3917.37  494.92
   1 -10  -4 3491.60  471.10
  -1 -10  -4 3757.62  965.20
  -1 -10   4 4219.46  506.04
  -1  10   511821.38 1265.80
  -1  10  -511302.22 1262.76
   1  10  -512024.34 1340.85
  -1  10  -510831.56 2169.56
  -1  10   510624.27 1236.96
   1  10   511892.27 1328.43
   1  10  -511228.40 1290.26
  -1  10  -512659.82 1381.62
   1  10  -513063.68 1430.18
  -1 -10  -510861.76 1241.67
   1 -10  -510250.45 2383.24
   1 -10   5 9363.80 2435.75
  -1 -10  -512184.16 1302.29
  -1 -10   5 9322.85 2495.89
   1 -10   5 8672.71 2806.74
  -1 -10   5 9696.35 2018.67
   1 -10   510697.77 1216.74
  -1  10   510622.85 1103.62
  -1  10  -510497.90 1079.59
   1 -10  -5 9880.71 1063.71
  -1 -10  -5 8665.53 1939.17
  -1 -10   5 8873.10 1862.00
  -1 -10   510384.37 1647.58
  -1  10  -5 9735.64 1014.40
  -1 -10  -5 8716.05  945.51
   1 -10  -510367.12 1105.24
  -1 -10  -5 8042.09 1546.16
  -1 -10   510167.51 1065.53
   1 -10   510302.65 1245.43
  -1  10   6  350.40  333.30
  -1  10  -6  -28.05  347.81
   1  10  -6 -126.19  440.36
  -1  10  -6  102.94  385.02
  -1  10   6  711.49  380.95
   1  10   6  151.55  313.51
   1  10  -6  141.85  402.34
  -1  10  -6   98.02  335.48
   1  10  -6  483.81  405.24
  -1 -10  -6  196.16  294.42
   1 -10  -6   36.09  452.35
   1 -10   6  164.39  276.34
  -1 -10   6  201.98  138.87
   1  10   6  302.32  266.76
   1 -10   6 -164.17  241.03
  -1 -10   6  110.35  187.91
  -1  10   6  132.88  190.19
  -1  10  -6  497.14  335.11
  -1 -10  -6   67.17  129.86
  -1 -10   6  192.62   98.18
  -1  10   6  632.72  333.80
  -1 -10   6 -227.97  193.53
  -1  10  -6  189.27  214.96
  -1 -10  -6  448.76  271.97
   1 -10  -6  144.07  162.93
  -1 -10  -6  -27.34  203.66
  -1 -10   6  186.95  154.43
   1 -10   6  243.14  220.38
  -1  10   726455.97 2870.49
   1  10  -724123.95 2651.78
   1  10   725904.58 2855.86
   1  10   725369.65 2767.35
   1 -10   722548.97 2372.51
  -1 -10   721276.29 2423.32
  -1  10   720232.18 2121.29
  -1  10  -720155.05 2128.61
  -1 -10  -722333.05 2355.97
  -1  10   719997.60 2124.91
  -1 -10   719905.40 2098.62
  -1  10  -721253.42 2223.98
  -1 -10  -720607.66 2182.55
   1 -10  -719768.34 2099.43
  -1 -10  -720230.50 2312.63
  -1 -10   720624.62 2189.96
   1 -10   721899.67 2307.96
  -1 -10   8 1795.19  455.56
   1 -10   8 1115.85  305.41
  -1  10   8  843.07  264.48
   1  10  -8  547.23  197.55
  -1  10  -8  582.79  204.31
  -1  10   8 1153.12  379.37
   1  10   8 1181.99  320.19
  -1 -10   8  880.48  309.87
  -1  10  -8 1170.89  363.82
  -1 -10  -8 1494.26  275.78
   1 -10  -8  773.07  239.47
  -1 -10  -8 1294.13  390.30
   1 -10   8  951.03  264.39
  -1 -10   8 1511.60  352.07
   1 -10   916461.62 2246.95
  -1 -10   916518.10 1839.79
  -1  10   916681.42  883.79
   1  10  -917940.42  972.00
  -1  10  -915994.22  900.41
  -1  10   916565.89  977.16
  -1 -10   915048.13  894.73
  -1  10  -916648.85  944.96
  -1 -10  -914921.90  867.76
   1 -10  -915094.88  876.35
  -1 -10  -914580.72  816.93
  -1 -10   915865.28 1092.53
   1 -10   917367.44  952.91
   1 -10  1016556.36  811.06
  -1 -10  1016168.16  790.17
  -1  10  1013999.36  657.72
   1  10 -1015952.01  712.39
  -1  10 -1015819.13  741.96
  -1  10  1016009.35  762.36
  -1 -10  1017677.22  722.02
  -1  10 -1014992.46  693.12
   1 -10 -1014668.31  737.59
  -1 -10 -1015549.79  713.86
   1 -10 -1016020.63  735.77
  -1 -10 -1014856.20  652.90
  -1 -10  1014206.10  692.94
   1 -10  1015186.60  740.19
  -1 -10  11  507.16  140.50
   1 -10  11  678.14  204.23
  -1  10  11  509.59  230.92
   1  10 -11  685.53  227.28
  -1  10 -11  238.11  221.60
  -1  10  11  618.52  233.81
  -1  10 -11  616.06  216.23
   1  10 -11 1290.05  354.08
  -1 -10 -11  594.89  209.49
   1 -10 -11  817.87  273.73
  -1 -10 -11  669.92  203.19
  -1 -10  11  460.85  204.66
   1 -10  11  746.03  253.84
  -1 -10  12 6202.13  893.46
   1 -10  12 7334.11 1053.25
  -1  10  12 4979.25  375.90
   1  10 -12 5512.29  462.30
  -1  10 -12 6502.90  509.10
  -1  10 -12 6387.40  472.55
   1  10 -12 5091.76  438.63
  -1 -10 -12 5902.30  437.04
   1 -10 -12 6111.94  488.88
  -1 -10 -12 4924.51  886.06
   1 -10  12 5429.84  430.10
  -1 -10  12 6104.25  479.00
   1 -10  13 1155.30  263.73
  -1 -10  13  840.18  183.61
  -1  10  13  893.10  285.16
   1  10 -13  703.14  195.89
  -1  10 -13  514.34  200.53
  -1  10 -13  841.71  221.14
   1  10 -13  618.05  239.30
  -1 -10 -13  619.30  257.09
   1 -10 -13  635.93  263.63
  -1 -10 -13  413.61  214.64
  -1 -10  13  756.51  200.36
   1 -10  13  484.88  221.27
   1 -10  14  590.16  269.93
  -1 -10  14  936.25  232.96
  -1  10 -14  434.04  189.41
   1  10 -14  275.32  155.61
  -1  10 -14  659.14  171.75
   1  10 -14  897.28  236.39
  -1 -10 -14  366.37  183.01
   1 -10 -14  500.45  211.37
  -1 -10  14  399.73  125.40
   1 -10  15  519.12  224.84
  -1 -10  15  784.64  240.07
  -1  10 -15  970.82  180.13
   1  10 -15  872.52  209.51
  -1  10 -15  920.68  195.35
   1  10 -15  844.44  272.98
  -1 -10 -15  390.83  167.46
   1 -10 -15  524.88  144.21
  -1 -10  15 1018.10  245.94
   1 -10  15  791.21  205.11
  -1 -10  16 1418.69  400.47
   1 -10  16 1440.50  617.16
  -1  10 -16 1419.47  309.65
   1  10 -16 1194.93  215.16
   1  10 -16 1046.64  217.53
  -1 -10 -16  784.71  178.64
   1 -10 -16 1455.26  325.91
  -1 -10  16 1506.37  323.86
   1 -10  16 1384.77  369.31
  -1  11   010750.40 1377.76
  -1  11   0 6430.31 1488.45
  -1  11   0 8701.74 1169.30
  -1 -11   0 7165.93 2755.97
   1 -11   0 6127.95 1622.54
  -1 -11   0 6988.56 2351.12
   1 -11   0 8568.93 1642.14
  -1  11   0 7321.44  909.80
   1 -11   0 8671.70 1767.87
  -1 -11   0 8355.68 1985.68
  -1 -11   0 6997.27 1540.71
   1 -11   0 8787.69 1052.85
  -1 -11   0 7132.41  876.25
  -1  11   1 7949.69 1119.02
  -1  11  -1 6543.84  929.94
  -1  11   1 5701.15 1973.10
  -1  11  -1 5401.48 2219.71
  -1  11  -1 7383.31 1013.64
  -1  11   1 6489.81  949.53
   1  11   1 8852.73 1174.16
   1  11  -1 6936.09  962.64
  -1 -11  -1 6576.74 2345.38
  -1 -11   1 4995.65 2359.15
   1 -11  -1 5950.31 1816.24
   1 -11   1 6339.28 1692.26
  -1 -11  -1 5338.67 1566.52
  -1 -11   1 5929.94 2606.05
   1 -11  -1 6963.76 1560.05
   1 -11   1 8061.51 1911.01
  -1  11   1 7865.98  981.74
  -1  11  -1 7320.24  958.63
   1 -11   1 6894.36 1335.30
   1 -11  -1 7851.14 1781.26
  -1 -11  -1 7480.52 1726.52
  -1 -11   1 6441.75 1516.21
  -1 -11  -1 6122.20  817.70
  -1 -11   1 6399.76 1427.62
   1 -11  -1 6017.38  776.77
   1 -11   1 6798.99  855.43
  -1 -11  -1 7811.95 1847.41
  -1 -11   1 6409.00  815.02
  -1  11   214477.34 1740.11
  -1  11  -215962.94 1888.86
  -1  11  -212981.91 1792.90
  -1  11   215920.79 1914.04
  -1  11  -214689.84 1765.34
   1  11   215100.47 1805.17
   1  11  -216105.23 1933.07
  -1 -11   2 9132.14 3407.52
  -1 -11  -213040.87 3402.01
   1 -11   215196.81 2614.70
  -1 -11  -215680.91 1813.38
  -1 -11   212405.18 3451.99
   1 -11  -212013.46 1560.54
   1 -11   213136.12 2865.19
  -1  11  -211556.35 1328.96
   1 -11  -211450.85 1370.58
   1 -11   211972.01 2103.50
  -1 -11  -213665.43 2553.94
  -1 -11   212683.92 2314.51
  -1 -11  -212622.29 1455.13
  -1 -11   210211.17 2070.43
   1 -11  -215341.36 2269.16
   1 -11   213047.32 1505.55
  -1 -11  -211899.39 2448.63
  -1 -11   212363.95 1426.56
  -1  11  -3 2063.02  539.47
  -1  11  -3  973.33  546.34
  -1  11  -3  626.66  389.65
   1  11   3 1597.88  456.28
   1  11  -3 1151.70  394.12
  -1  11  -3 1660.06  462.64
  -1 -11  -3 1385.43  601.97
   1 -11  -3 1012.80  445.27
   1 -11   3 1146.87  394.89
  -1 -11  -3  900.32  319.87
  -1 -11   3 1136.34  448.01
   1 -11   3  881.18  321.40
  -1  11   3 1196.04  288.65
  -1  11  -3 1190.04  314.98
   1 -11  -3 1868.15  533.01
   1 -11   3 1131.32  364.86
  -1 -11  -3 1253.98  372.30
  -1 -11   3  924.30  266.81
  -1 -11   3  552.53  176.12
  -1  11  -3  342.93  220.69
  -1 -11  -3 1922.79  378.33
   1 -11  -3  987.05  377.10
   1 -11   3 1320.24  356.76
  -1 -11  -3 1309.88  331.94
   1 -11   3  934.01  280.77
  -1 -11   3  873.68  316.01
  -1  11   417165.30 2021.01
  -1  11  -415601.40 1816.68
  -1  11  -412721.80 2881.73
  -1  11   415735.91 1819.59
   1  11   416342.46 1913.27
   1  11  -416247.54 1949.59
  -1  11  -417669.44 2053.18
   1  11  -416218.91 1950.33
  -1 -11  -416206.65 2396.28
   1 -11   412133.01 2749.74
  -1 -11  -416906.26 1961.30
  -1 -11   411073.84 3287.61
   1 -11   4 9469.75 4051.31
   1 -11   416767.41 2605.17
  -1 -11   413129.15 2379.34
  -1  11   412677.99 1392.91
  -1  11  -414337.99 1555.29
   1 -11  -413069.32 2025.40
  -1 -11  -412875.76 1405.84
  -1 -11   414865.23 2134.69
  -1 -11   411631.59 2375.48
  -1  11  -415279.89 2395.81
  -1 -11  -413759.75 1524.62
   1 -11  -413581.46 1499.30
   1 -11   413204.02 1468.36
  -1 -11  -414276.18 1566.88
  -1 -11   414966.84 1625.45
   1 -11   414338.44 1589.52
   1 -11   5 2865.17  759.71
  -1 -11   5 2750.40  600.83
  -1  11   5 1795.74  341.14
  -1  11  -5 1822.14  335.05
  -1 -11  -5 2360.85  570.97
  -1 -11   5 2115.19  654.47
  -1  11   5 1878.44  349.99
  -1 -11   5 2511.36  594.27
  -1  11  -5 2045.54  432.24
  -1 -11  -5 2252.91  493.22
   1 -11  -5 2594.11  445.03
   1 -11   5 1492.07  333.61
  -1 -11  -5 2532.09  480.47
  -1 -11   5 2053.38  379.15
   1 -11   5 2466.55  412.54
  -1 -11   622332.59 3487.12
   1 -11   623517.90 1130.88
  -1  11   620152.33  977.35
  -1  11  -622629.05 1053.17
  -1 -11  -620686.50  949.99
  -1 -11   622688.76 2216.94
  -1  11   622868.09 1051.46
  -1 -11   620812.99 1215.90
  -1  11  -621681.38 1013.90
  -1 -11  -623103.43 1061.08
   1 -11  -621526.37 1006.37
  -1 -11  -620575.64 1566.88
  -1 -11   619878.85  940.90
   1 -11   620638.23  972.91
  -1 -11   7  565.04  265.29
   1 -11   7  764.47  232.44
  -1  11   7  477.81  196.29
  -1  11  -7  549.72  271.62
  -1 -11  -7  403.31  164.49
  -1  11   7  417.91  231.48
  -1 -11   7  986.68  392.95
  -1  11  -7  236.01  204.56
  -1 -11  -7  358.56  241.96
   1 -11  -7  430.71  193.43
  -1 -11  -7  417.04  191.81
  -1 -11   7  718.33  323.19
   1 -11   7  383.31  336.14
  -1 -11   8 3969.30 1002.74
   1 -11   8 6394.82 1283.54
  -1  11   8 3941.33  393.63
  -1  11  -8 4845.21  441.23
  -1  11   8 5139.51  475.70
   1  11   8 6231.53  540.16
  -1  11  -8 5678.81  734.62
  -1 -11  -8 6067.43  576.50
   1 -11  -8 4835.54  482.12
  -1 -11  -8 4226.10 1273.45
  -1 -11   8 6334.05  528.42
   1 -11   8 5071.19  470.56
   1 -11   9  274.25  195.12
  -1 -11   9  192.81  235.45
  -1  11   9  310.36  187.56
   1  11  -9  742.95  264.26
  -1  11  -9  377.82  218.37
  -1  11   9  286.70  206.41
   1  11   9  329.42  140.61
  -1  11  -9  478.67  225.10
   1  11  -9  652.92  249.71
  -1 -11  -9  563.66  236.27
   1 -11  -9 1003.28  270.75
  -1 -11  -9  605.86  188.32
  -1 -11   9  446.28  197.15
   1 -11   9  -45.51  238.00
  -1 -11  10 2795.44  471.41
   1 -11  10 3541.51  743.66
  -1  11  10 2769.05  321.60
  -1  11 -10 2419.06  353.39
   1  11 -10 3183.20  375.02
  -1  11  10 3283.60  352.07
  -1  11 -10 3186.64  520.41
   1  11 -10 3160.41  379.99
  -1 -11 -10 3528.27  413.52
   1 -11 -10 2916.63  328.42
  -1 -11  10 4062.21  417.53
   1 -11  10 3478.78  377.27
   1 -11  11  365.67  174.52
  -1 -11  11  435.29  210.23
  -1  11  11  130.93  125.25
   1  11 -11  211.13  161.03
  -1  11 -11  546.21  263.92
  -1  11  11  224.84  175.29
  -1  11 -11  360.57  203.35
   1  11 -11  924.15  239.62
  -1 -11 -11  615.17  207.83
   1 -11 -11   24.02  165.75
  -1 -11  11  582.30  214.24
   1 -11  11  479.35  198.59
   1 -11  12  724.94  235.71
  -1 -11  12  784.63  212.48
  -1  11  12  657.05  216.83
   1  11 -12  432.12  175.96
  -1  11 -12  462.16  192.23
  -1  11 -12 1393.72  308.44
   1  11 -12  434.32  169.55
   1 -11 -12  764.44  234.95
  -1 -11 -12  421.01  116.10
   1 -11  12  614.48  174.80
  -1 -11  13  501.49  143.42
   1 -11  13  817.03  238.86
   1  11 -13  996.72  215.09
  -1  11 -13  755.55  252.75
  -1  11 -13  497.97  250.52
   1  11 -13  740.92  209.76
   1 -11 -13  737.82  178.48
  -1 -11 -13  726.30  222.81
  -1 -11  13  752.57  204.92
   1 -11  13  547.48  177.03
   1 -11  14 1548.62  289.83
  -1 -11  14 1298.24  354.66
  -1  11 -14 1398.13  269.03
   1  11 -14 1718.95  294.49
  -1  11 -14 1285.95  260.89
   1  11 -14 1287.16  209.72
  -1 -11 -14  454.41  341.81
   1 -11 -14 1014.63  198.63
   1 -11  14 1970.49  325.87
  -1 -11  14 1734.64  308.54
   1 -11  15 2750.48  724.78
  -1 -11  15 1819.11  576.34
  -1  11 -15 2893.78  527.30
   1  11 -15 2083.04  418.40
  -1  11 -15 1713.69  338.69
   1  11 -15 3556.00  637.24
   1 -11 -15 2038.40  416.63
   1 -11  15 2906.35  535.56
  -1 -11  15 2253.75  450.26
   1 -12   0 5595.00 1309.57
   1 -12   0 4560.28  840.35
  -1 -12   0 5125.77  662.46
  -1 -12   0 4079.40  421.13
   1 -12   0 5278.63 1042.02
  -1 -12   0 5514.03  965.86
   1 -12  -110892.18 1897.05
   1 -12   111527.11 2256.81
  -1  12  -112083.93  716.70
   1 -12   111969.52 1903.39
   1 -12  -112081.85 1874.03
  -1 -12  -112368.26 2206.79
  -1 -12   111669.73 1859.87
  -1 -12  -1 8718.52  644.26
  -1 -12   1 9627.95  677.40
   1 -12   110666.97  684.90
   1 -12  -112099.94 2024.46
  -1 -12  -110829.56 2091.85
  -1 -12   1 9726.57  647.81
   1 -12   2 1277.22  445.04
  -1  12   2  956.42  344.82
  -1  12  -2 1485.25  305.92
   1 -12  -2 1520.74  337.69
  -1 -12  -2 1717.73  388.00
   1 -12   2 1576.39  356.32
  -1 -12   2 1131.77  203.47
  -1 -12  -2  948.50  257.49
  -1 -12   2 1192.60  283.54
   1 -12   2  854.20  243.26
   1 -12  -2  992.17  303.38
  -1 -12  -2 1521.34  555.83
  -1 -12   2 1195.25  310.96
   1 -12   3 2297.73  523.45
  -1  12   3 2690.36  401.08
  -1  12  -3 1984.69  291.35
   1 -12  -3 3329.39  742.71
   1 -12   3 2403.57  476.20
  -1 -12  -3 3874.79  984.36
  -1 -12   3 1827.78  340.78
  -1  12  -3 2952.69  363.33
  -1 -12  -3 2640.75  392.17
   1 -12  -3 1991.60  373.20
   1 -12   3 1909.87  315.37
  -1 -12  -3 2393.07  602.04
  -1 -12   3 2175.46  319.18
   1 -12   4 5045.65 1289.70
  -1  12  -4 4896.10  445.98
  -1 -12  -4 6390.49 1277.90
  -1 -12   4 5694.52  736.94
   1 -12  -4 4347.36  487.15
  -1 -12  -4 5786.24 1469.12
   1 -12   4 5194.03  464.16
  -1 -12   4 5215.75  471.46
   1 -12   5 6163.94 1655.70
  -1 -12   5 4532.49 1039.28
  -1  12   5 6722.38  524.61
  -1  12  -5 5912.41  525.58
  -1 -12  -5 6839.86 1802.73
  -1 -12   5 6094.06  735.41
  -1  12   5 5899.54  531.12
  -1  12  -5 9036.30 1661.66
   1  12  -5 6311.91  529.48
  -1 -12  -5 5799.40  503.15
   1 -12  -5 7237.33  576.54
   1 -12   5 5011.08  501.66
  -1 -12  -5 5527.66  415.25
  -1 -12   5 6263.79  593.29
   1 -12   5 6560.15  525.73
  -1 -12   6  383.45  354.35
   1 -12   6  542.33  127.29
  -1  12   6  400.13  190.24
  -1  12  -6  658.64  263.30
  -1 -12  -6  693.40  231.82
  -1 -12   6  907.81  187.84
  -1  12   6  530.85  281.15
  -1  12  -6  468.73  175.79
   1  12  -6  524.46  258.97
  -1 -12  -6  560.37  226.16
   1 -12  -6  549.32  232.36
  -1 -12  -6  638.15  138.33
  -1 -12   6  658.59  280.33
   1 -12   6 1031.88  267.09
  -1 -12   7 2298.72  583.70
   1 -12   7 3233.21  875.92
  -1  12   7 2468.34  340.39
  -1  12  -7 2462.90  343.87
  -1  12   7 2590.62  402.31
   1  12   7 2391.90  335.51
  -1  12  -7 3622.91  559.60
   1  12  -7 2034.19  328.80
  -1 -12  -7 2021.10  351.08
   1 -12  -7 2497.39  366.03
  -1 -12  -7 1603.23  279.83
   1 -12   7 2365.56  370.27
  -1 -12   7 2114.28  337.52
   1 -12   8  238.69  176.16
  -1 -12   8   92.91  139.51
  -1  12   8  171.42  152.25
  -1  12  -8  328.56  228.00
  -1  12   8  417.21  294.78
   1  12   8  321.09  179.71
  -1  12  -8  264.69  220.44
   1  12  -8   20.88  171.78
  -1 -12  -8  376.49  237.11
   1 -12  -8  204.82  260.18
   1 -12   8   83.24  176.47
  -1 -12   8  405.19  236.19
   1 -12   9 8272.38 2000.05
  -1 -12   9 7298.79 1748.15
  -1  12   9 6736.88  464.71
  -1  12  -9 7435.65  482.29
   1  12   9 6371.47  692.26
  -1  12   9 6406.93  461.83
  -1  12  -9 7487.22  492.28
   1  12  -9 7092.21  506.71
  -1 -12  -9 6724.08  498.33
   1 -12  -9 6767.01  531.54
   1 -12   9 7654.19  534.51
  -1 -12   9 7480.90  528.52
   1 -12  10 1518.96  377.63
  -1 -12  10  992.22  294.83
  -1  12  10 1867.11  301.38
  -1  12 -10 1426.65  229.60
  -1  12  10 2015.49  333.00
  -1  12 -10 1403.84  367.02
   1  12 -10 1831.41  319.44
  -1 -12 -10 2114.05  644.57
   1 -12 -10 1344.97  263.02
   1 -12  10 2013.64  317.72
  -1 -12  10 1594.79  332.87
   1 -12  11 4060.54 1025.28
  -1 -12  11 4395.58 1140.01
  -1  12 -11 3221.91  311.11
  -1  12  11 3611.26  356.39
  -1  12 -11 2516.14  321.07
   1  12 -11 3795.92  407.24
  -1 -12 -11 4116.42  664.46
   1 -12 -11 3489.55  340.39
  -1 -12  11 4266.13  429.85
   1 -12  11 3666.17  764.63
  -1 -12  12 1148.18  329.98
  -1  12 -12  961.10  219.78
  -1  12 -12  789.26  213.96
   1  12 -12 1231.83  239.11
  -1 -12 -12 1742.61  289.05
  -1 -12  12 1114.88  221.45
   1 -12  12 1121.03  242.23
  -1 -12  13  634.22  164.16
  -1  12 -13  365.18  159.07
  -1  12 -13  621.65  170.74
   1  12 -13  534.69  194.19
  -1 -12 -13  293.93  113.50
  -1 -12  13  260.62  130.94
   1 -12  13  674.49  186.23
  -1 -12  14  134.69   84.41
   1 -12  14  114.70   77.76
  -1  12 -14  144.96  165.75
  -1  12 -14  132.46  118.32
   1  12 -14  180.96  119.63
   1 -12  14  243.98  162.23
   1 -13   025552.49 1202.67
   1 -13   027682.02 1317.55
  -1 -13   026938.58 1242.01
  -1 -13   024288.20 1204.82
   1 -13   026250.12 1290.90
  -1 -13   026370.21 1544.15
   1 -13   1 5655.38 1273.23
  -1  13   1 6519.56  468.23
   1 -13   1 6088.31 1448.18
   1 -13  -1 6567.96 1088.76
  -1 -13  -1 7233.29 1102.29
  -1 -13   1 5762.13 1079.61
  -1 -13   1 5278.06  513.80
  -1 -13  -1 6528.42  566.01
   1 -13   1 5828.92  540.46
   1 -13  -1 5774.32  499.98
  -1 -13   1 6230.24 1571.78
  -1 -13  -1 6180.12 1403.15
   1 -13   2  208.70  194.89
  -1  13   2  462.89  196.85
  -1  13  -2  524.27  232.54
   1 -13  -2  229.94  154.99
   1 -13   2  510.09  123.19
  -1 -13  -2  354.85  110.82
  -1 -13   2  393.23  265.02
  -1 -13  -2  382.42  257.50
   1 -13  -2  519.53  337.34
  -1 -13  -2  244.10  140.88
  -1 -13   2 1077.32  303.40
   1 -13   3 9142.58 1648.46
  -1  13   3 7234.24  493.37
  -1  13  -3 7661.66  501.01
   1 -13   3 6940.01 1173.81
  -1 -13  -3 8537.17 1152.06
  -1 -13   3 7878.21 1166.78
  -1  13   3 7326.05  557.92
  -1 -13  -3 8154.15  558.38
   1 -13  -3 8298.42  535.22
   1 -13   3 6932.35 1549.18
  -1 -13  -3 8048.97 1575.09
  -1 -13   3 8450.09  578.93
   1 -13   416133.19  733.49
  -1  13   415052.58  652.75
  -1  13  -415197.40  684.65
  -1 -13  -414820.84 1290.38
  -1 -13   417966.24 2800.29
  -1  13  -416358.48  722.61
  -1 -13  -416207.64  756.75
   1 -13  -415798.72  738.60
   1 -13   414261.33 2457.72
  -1 -13  -415539.79 2339.62
  -1 -13   414936.00  739.19
  -1 -13   5   93.36  129.78
   1 -13   5  442.72  195.12
  -1  13   5  236.37  136.50
  -1  13  -5  151.95  134.77
  -1 -13  -5  160.26  111.04
  -1 -13   5  356.39  173.63
  -1  13   5  570.56  297.61
  -1  13  -5  143.16  164.62
   1  13  -5  257.20  196.72
  -1 -13  -5  374.62  223.64
   1 -13  -5  285.41  205.62
   1 -13   5  318.64  183.44
  -1 -13  -5  135.87  116.30
   1 -13   5  330.17  189.01
  -1 -13   5  206.37  215.45
   1 -13   6   63.75  131.91
  -1 -13   6  194.81  147.65
  -1  13   6    0.34  136.02
  -1  13  -6  147.05  140.60
  -1 -13  -6  172.82   72.53
  -1 -13   6  118.55  103.05
  -1  13   6   47.74  131.15
  -1  13  -6  161.84  207.72
   1  13  -6  319.07  184.51
  -1 -13  -6  398.24  214.45
   1 -13  -6  415.62  308.09
  -1 -13  -6  138.02  159.19
  -1 -13   6  242.94  199.27
   1 -13   6  481.76  212.45
  -1  13  -7 2817.99  340.31
   1  13   7 3233.71  509.43
  -1 -13  -7 3000.45  384.93
  -1 -13   7 2431.38  351.84
  -1 -13   8  109.15  135.72
   1 -13   8 -140.22  200.71
  -1  13   8  444.67  183.91
  -1  13  -8  520.84  252.73
  -1  13   8  791.65  253.14
   1  13   8  934.61  242.95
  -1  13  -8  597.46  190.31
   1  13  -8  624.74  226.67
  -1 -13  -8  740.52  232.82
   1 -13  -8  727.11  194.51
  -1 -13   8  843.20  281.08
   1 -13   8  544.29  187.89
  -1  13  -9 3335.08  356.73
  -1  13   9 2632.31  300.18
   1  13   9 3367.69  367.57
  -1  13  -9 2825.90  304.09
   1  13  -9 2894.81  570.36
  -1 -13  -9 2420.98  295.32
   1 -13  -9 2867.96  306.42
  -1 -13   9 3275.05  330.52
   1 -13   9 2307.59  316.45
  -1 -13  10 1013.98  354.43
  -1  13 -10 1143.37  229.19
  -1  13  10  936.60  227.24
  -1  13 -10 1259.80  266.54
   1  13 -10 1174.86  252.94
  -1 -13 -10 1211.68  183.37
   1 -13 -10 1162.91  194.44
   1 -13  10 1223.88  251.32
  -1 -13  10 1342.85  216.22
  -1  13 -11 1280.59  199.62
  -1  13  11 1250.40  202.15
  -1  13 -11 1801.43  244.42
   1  13 -11 1568.82  263.13
   1 -13 -11 1227.74  287.81
  -1 -13 -11 1631.96  252.28
  -1 -13  11 1381.79  214.89
   1 -13  11 1878.72  332.54
   1 -13  12   89.17   79.32
  -1 -13  12   31.49   61.42
  -1  13 -12  217.89  110.02
  -1  13 -12  243.97  142.02
   1  13 -12  281.22  108.86
  -1 -13 -12  740.74  204.63
  -1 -13  12  608.87  175.04
   1 -13  12  688.03  199.26
   1 -13  13  250.99  246.24
  -1  13 -13  460.02  175.70
  -1  13 -13  450.38  195.48
   1  13 -13  460.72  151.29
   1 -13  13  363.40  165.33
  -1 -13  13  787.35  220.03
  -1  14   0  460.07  230.30
  -1 -14   0  942.26  220.24
  -1 -14   0  690.19  273.21
   1 -14   0  474.64  204.58
  -1 -14   0  895.12  258.88
   1 -14   1  950.31  480.11
  -1  14   1 1644.99  253.55
   1 -14   1 1913.64  377.16
  -1 -14   1 1338.11  380.51
  -1 -14  -1 1785.31  397.92
  -1  14   1 1277.97  310.98
  -1 -14  -1 1287.32  350.98
  -1 -14   1 1031.57  228.88
   1 -14   1 1663.96  274.21
   1 -14  -1 1701.27  594.24
  -1 -14  -1 1261.34  265.92
  -1 -14   1 1654.02  372.61
   1 -14   2  807.21  262.56
  -1  14   2  908.77  232.84
  -1 -14  -2  969.03  179.22
   1 -14   2 1352.00  371.51
  -1 -14   2 1050.59  266.20
  -1  14   2 1298.58  296.33
  -1 -14  -2  843.09  212.57
   1 -14  -2 1277.31  325.99
   1 -14   2 1065.44  331.02
  -1 -14  -2 1023.74  195.10
  -1 -14   2  724.76  240.80
   1 -14   3 1266.23  373.14
  -1  14   3 1113.92  238.59
   1 -14   3  572.61  397.75
  -1 -14  -3  851.88  217.88
  -1 -14   3 1107.76  238.13
  -1  14   3  868.86  291.72
  -1 -14  -3  842.80  286.17
   1 -14  -3  939.01  244.88
   1 -14   3  683.01  217.89
  -1 -14  -3 1314.96  282.52
  -1 -14   3 1461.62  318.01
   1 -14   4  978.06  277.78
  -1  14   4  572.78  185.64
  -1  14  -4  816.77  232.64
  -1 -14  -4 1150.60  231.60
  -1 -14   4  531.17  146.89
  -1  14   4 1016.45  240.12
  -1 -14  -4  668.93  278.29
   1 -14  -4  958.54  305.76
  -1 -14  -4  672.56  212.61
  -1 -14   4 1073.87  288.72
   1 -14   5 1324.53  287.94
  -1  14   5 1240.45  246.90
  -1  14  -5 2187.52  350.67
  -1 -14   5 1473.39  411.53
  -1  14   5 1611.71  395.14
  -1  14  -5  743.47  354.07
   1  14  -5 1007.75  248.44
  -1 -14  -5  947.55  239.75
   1 -14  -5 1965.73  374.70
  -1 -14   5 1432.35  238.70
   1 -14   610984.43 1632.19
  -1  14   6 9055.27  518.91
  -1  14  -6 9093.71  496.65
  -1 -14   6 7199.03 1668.83
  -1  14   610483.22  553.11
   1  14   6 9824.36  559.31
  -1  14  -6 9293.32  762.12
   1  14  -6 9661.90 1304.94
   1 -14  -6 9541.73  528.20
  -1 -14   611302.60  616.75
   1 -14   6 9291.11  540.12
   1 -14   7 2105.60  580.54
  -1 -14   7 1408.38  487.94
  -1  14  -7 1902.60  252.19
  -1  14   7 2125.33  352.83
   1  14   7 1639.01  330.26
  -1  14  -7 2162.05  262.42
   1  14  -7 1457.06  351.67
  -1 -14  -7 1738.86  270.92
   1 -14  -7 2198.87  278.10
  -1 -14   7 2011.22  270.08
   1 -14   7 2193.99  315.28
  -1 -14   8   43.61  114.71
   1 -14   8  231.73  184.51
  -1  14  -8  396.64  133.29
  -1  14   8  355.89  223.55
   1  14   8  209.99  145.87
  -1  14  -8  151.27  156.86
   1  14  -8  477.24  154.88
  -1 -14  -8   33.59  181.92
   1 -14  -8  573.34  225.75
  -1 -14   8  167.32  165.45
   1 -14   8  144.33  111.67
   1 -14   9 4965.83 1223.93
  -1 -14   9 3434.37  701.46
  -1  14  -9 3599.94  377.06
   1  14   9 3011.98  494.84
  -1  14   9 4250.80  405.87
  -1  14  -9 4917.56  403.69
   1  14  -9 4025.91  384.12
  -1 -14  -9 3260.05  656.54
   1 -14  -9 4491.94  418.01
  -1 -14   9 4784.27  485.97
   1 -14   9 3762.01  398.28
  -1 -14  10 5642.88  650.84
   1 -14  10 7104.36 1538.65
  -1  14 -10 6701.36  747.89
  -1  14  10 5840.37  832.58
  -1  14 -10 6519.99 1104.46
   1  14 -10 5623.61 1473.89
  -1 -14 -10 8158.68 1194.09
   1 -14 -10 3762.49 1377.56
  -1 -14  10 7470.90  835.46
   1 -14  10 6366.84  718.58
   1 -14  11 1429.73  616.01
  -1  14 -11 1340.56  310.76
  -1  14 -11 1924.88  374.77
   1  14 -11 2226.60  420.84
  -1 -14 -11 1394.99  359.11
  -1 -14  11 1937.27  390.48
   1 -14  11 1393.31  296.72
   1 -14  12  -23.65   82.71
  -1  14 -12  223.79  108.46
   1  14 -12  319.19  140.22
  -1 -14  12  190.85  116.00
  -1  15   0  263.38  179.58
  -1 -15   0  549.91  131.22
  -1  15   0  415.37  215.30
  -1 -15   0  743.07  243.40
   1 -15   0  356.54  163.28
  -1 -15   0  588.86  201.71
  -1  15   1   48.35  129.77
  -1  15  -1  222.86  207.71
  -1 -15   1  389.85  244.94
  -1 -15  -1  284.36  114.08
  -1  15  -1  255.57  161.20
  -1  15   1  685.06  275.54
  -1 -15  -1  270.55  169.22
  -1 -15   1  181.20  139.16
   1 -15  -1  204.30  194.06
   1 -15   1  438.84  165.34
  -1 -15  -1  393.40  137.62
  -1 -15   1  327.98  120.01
  -1  15   2  431.78  134.94
  -1  15  -2  254.27  156.63
  -1 -15   2  543.89  117.32
  -1 -15  -2  366.99  166.86
  -1  15  -2  156.51  229.98
  -1  15   2  538.47  265.41
  -1 -15  -2  319.71  162.81
   1 -15  -2  241.36  189.67
   1 -15   2  513.48  193.98
  -1 -15  -2  412.10  117.61
  -1 -15   2  145.00   98.64
  -1  15   3 2040.86  249.43
  -1 -15  -3 2801.22  837.88
  -1 -15   3 1828.52  502.56
  -1  15  -3 1672.20  259.64
  -1  15   3 2100.14  311.84
  -1 -15  -3 2400.11  307.86
   1 -15  -3 1976.56  267.64
   1 -15   3 1554.01  272.43
  -1 -15  -3 1387.34  317.45
  -1 -15   3 2118.65  330.12
   1 -15   4  530.90  188.38
  -1  15   4  627.95  212.98
  -1 -15   4  417.52  223.75
  -1  15   4  781.90  227.50
   1  15   4  600.73  193.83
  -1 -15  -4 1079.78  291.67
   1 -15   4  599.41  199.28
   1 -15  -4  642.56  192.14
  -1 -15   4  664.82  185.45
   1 -15   5 1466.86  464.08
  -1 -15   5 1092.68  290.68
  -1  15   5 1679.09  277.37
   1  15   5 1821.95  236.86
  -1 -15  -5 1958.43  255.32
   1 -15  -5 2352.18  345.19
  -1 -15   5 1420.67  441.87
   1 -15   6 1796.49  397.86
  -1  15   6 2466.23  331.28
   1  15   6 1725.21  498.62
  -1  15  -6 1062.33  564.20
   1 -15  -6 2115.73  322.92
  -1 -15   6 1804.35  658.47
   1 -15   7 1156.32  434.69
  -1  15   7 1351.67  264.66
   1  15   7  873.33  201.69
  -1  15  -7  866.81  231.57
   1  15  -7 1147.36  244.81
  -1 -15  -7 1390.39  317.89
   1 -15  -7 1172.28  218.28
  -1 -15   7 1114.99  298.34
   1 -15   8  159.31  110.58
  -1  15   8  230.36  118.61
   1  15   8  268.28  136.19
  -1  15  -8   72.40   77.27
   1  15  -8  349.89  162.57
  -1 -15  -8   85.40   94.36
   1 -15  -8   89.20  111.36
  -1 -15   8  244.37  144.62
   1 -15   9  808.92  340.39
  -1  15   9  803.80  188.18
  -1  15  -9  830.30  230.78
   1  15  -9  788.57  180.16
  -1 -15  -9  826.39  335.45
   1 -15  -9  700.64  247.57
  -1 -15   9 1192.80  354.33
  -1  15 -10 1392.81  279.04
  -1 -15 -10 1521.68  434.67
  -1 -15  10  505.47  414.34
  -1  16   0   95.88  137.18
  -1 -16   0  159.23   90.05
  -1  16   0   19.84  121.43
  -1 -16   0  -30.92  111.77
   1 -16   0  177.41  149.82
  -1 -16   0   13.28  100.39
  -1  16   1  391.52  166.90
  -1  16  -1  578.15  194.80
  -1 -16   1  148.41  124.79
  -1  16   1  518.11  165.91
  -1 -16  -1  392.45  162.23
   1 -16  -1  435.12  171.30
   1 -16   1  303.28  165.16
  -1 -16   1  175.83  138.36
  -1  16  -2  634.91  156.03
  -1 -16   2  612.24  214.22
  -1  16  -2  749.64  177.88
  -1  16   2 1216.14  265.59
   1  16   2  898.71  213.61
  -1 -16  -2 1118.84  217.45
   1 -16  -2 1194.15  263.21
   1 -16   2 1215.87  229.65
  -1 -16   2 1246.60  193.04
  -1  16  -3 1047.56  226.96
  -1 -16   3  899.13  257.27
  -1  16   3 2055.81  346.21
   1  16   3 1093.00  246.36
  -1 -16  -3 1218.05  223.22
   1 -16  -3 1038.07  242.77
   1 -16   3 1013.10  279.73
  -1 -16   3  956.17  237.41
  -1  16  -4 2644.28  369.40
  -1 -16   4 1192.20  715.66
   1  16   4 3613.30  465.49
  -1 -16  -4 3043.93  456.62
  -1 -16   4 2244.82  589.09
  -1  16  -5 2444.50  364.11
  -1  16   5 3028.46  400.37
   1  16   5 2042.12  376.69
  -1 -16  -5 2247.06  851.62
   1 -16  -5 3326.24  462.40
  -1 -16   5 1705.60  712.21
  -1  16  -6 2256.88  450.96
  -1  16   6 1757.31  346.35
   1  16   6 1490.00  337.63
  -1 -16  -6 1306.83  535.69
   1 -16  -6 1504.00  313.18
  -1 -16   6 1152.95  750.86
  -1  16  -7 1300.32  294.39
  -1  16   7 2164.74  422.81
  -1 -16  -7 1778.02  567.61
   1 -16  -7 1869.53  386.89
  -1 -16   7  686.33  308.76
  -1  17   0  735.34  198.17
   1  17   0  423.63  207.04
   1 -17   0  870.99  237.66
  -1  17   1 1250.64  222.83
   1  17  -1 1569.98  351.69
   1  17   1 1664.35  350.33
   1 -17  -1 1605.33  332.69
  -1  17   2  197.18  109.82
   1  17   2  235.56  183.34
   1  17  -2  127.47  144.10
   1 -17  -2   77.31  116.23
  -1  17   3 2404.99  462.85
   1  17   3 2998.15  560.07
   1 -17  -3 2614.37  500.00
   1 -17  -4 1280.49  266.57
  -2   0   015952.44  358.85
  -2   0   014841.71  370.81
  -2   0   014150.69  386.54
  -2   0   014133.14  405.62
  -2   0   013625.54  435.85
  -2   0   013732.55  407.49
   2   0   014441.65  403.56
  -2   0   015199.01  394.55
  -2   0   128127.90  556.82
  -2   0  -128494.18  513.16
  -2   0   129524.86  645.03
  -2   0  -129206.54  566.88
  -2   0  -128513.44  577.01
  -2   0   127868.42  621.71
  -2   0   127026.03  601.41
  -2   0  -128371.11  675.59
  -2   0   129330.56  678.37
   2   0  -127764.11  638.54
   2   0  -128506.21  585.78
   2   0   128265.71  635.64
   2   0   129676.66  589.36
  -2   0   241477.05  789.47
  -2   0  -244660.43  755.08
  -2   0   243256.86  838.15
  -2   0  -241665.05  758.16
  -2   0  -243778.80  755.97
  -2   0   244413.36  898.21
  -2   0   241770.02  830.13
  -2   0  -242695.42  841.52
   2   0  -242370.35  893.89
  -2   0  -240481.38  830.97
   2   0  -242447.84  883.35
  -2   0  -241551.81  861.42
   2   0  -243158.99  764.73
   2   0   244024.50  829.92
  -2   0   3 5260.19  263.35
  -2   0  -3 5292.86  225.60
  -2   0   3 4751.51  273.00
  -2   0  -3 4504.71  203.53
  -2   0  -3 5542.61  175.25
  -2   0   3 4655.56  271.05
  -2   0   3 5707.87  639.53
  -2   0  -3 5110.36  612.72
   2   0  -3 5182.05  287.23
  -2   0  -3 4700.19  253.67
   2   0  -3 4932.40  264.86
  -2   0  -3 4925.92  276.36
   2   0  -3 5369.45  189.89
  -2   0   3 5599.46  202.08
   2   0   3 4724.38  265.02
   2   0   4  255.96   72.34
  -2   0   4  162.42  130.71
  -2   0   4  200.85  109.65
  -2   0  -4  377.35  122.93
  -2   0   4  264.07   88.38
  -2   0   4  146.25   98.71
  -2   0  -4  407.01  209.16
  -2   0  -4  181.47  107.71
   2   0  -4  353.68  254.22
  -2   0  -4  106.77  101.59
   2   0  -4  256.11  137.68
  -2   0  -4  169.07  177.91
   2   0  -4  263.06   48.94
   2   0   4  250.81  239.88
   2   0   5 2103.00  193.72
  -2   0   5 1878.99  570.91
  -2   0   5 1433.78  545.40
  -2   0  -5 1637.42  191.68
  -2   0   5 2172.90  699.75
  -2   0   5 1885.10  624.96
  -2   0  -5 1537.65  402.33
  -2   0  -5 1825.56  615.85
   2   0  -5 1912.83  247.66
  -2   0  -5 2255.37  623.62
   2   0  -5 1828.59  252.25
  -2   0  -5 1959.07  288.99
  -2   0   5 1898.96  474.73
   2   0   5 1682.88  224.06
   2   0   633539.68 1175.16
  -2   0   630872.42 1151.32
  -2   0   630655.41 1137.93
  -2   0  -633808.51 1207.16
  -2   0   632452.36 1289.56
  -2   0  -629716.06 1165.28
   2   0  -634663.75 1293.25
  -2   0  -632720.51 1221.67
   2   0  -632333.91 1218.88
  -2   0  -631543.74 1196.34
   2   0  -632514.36 1194.96
   2   0   632723.20 1218.96
  -2   0   632262.99 1135.92
   2   0   633027.70 1210.98
  -2   0   7  312.10  244.80
  -2   0   7  879.92  258.48
  -2   0  -7  362.12  194.75
  -2   0   7  130.83  141.58
  -2   0  -7  192.33  117.68
   2   0  -7  296.58  245.51
  -2   0  -7  197.63  163.13
   2   0  -7  -20.66  235.57
  -2   0  -7  485.65  155.07
   2   0  -7  269.43  175.87
   2   0   7  414.68  199.47
   2   0   7  549.64  212.63
   2   0   8 7923.15  493.28
  -2   0   8 8150.78  502.71
  -2   0  -8 7250.07  440.50
   2   0  -8 8477.91  546.69
  -2   0   8 8195.75  892.91
  -2   0  -8 7927.62  797.23
   2   0  -8 7626.50  498.67
  -2   0  -8 7984.80  511.00
   2   0  -8 7009.93 1397.82
  -2   0  -8 9187.72  833.49
   2   0  -8 7769.00  465.18
   2   0   8 7487.86  452.11
  -2   0   8 7938.62  445.08
   2   0   8 7458.28  524.86
   2   0   9 8139.80  498.64
  -2   0   9 9073.81  688.57
  -2   0  -9 8652.24  547.31
   2   0  -9 8702.29  575.83
  -2   0   9 9904.32  607.11
   2   0  -9 9837.69  583.94
  -2   0  -9 8115.52  537.99
  -2   0  -9 8854.11  637.71
   2   0  -9 8602.11  531.73
   2   0   9 8963.85  567.44
  -2   0   9 9511.45  537.00
   2   0   9 8695.50  575.21
   2   0  10 4689.82 1451.50
  -2   0  10 5350.44 1324.67
  -2   0 -10 5444.03  487.56
   2   0 -10 4683.01  455.74
  -2   0  10 4473.41 1268.86
  -2   0 -10 5502.01 1551.57
  -2   0 -10 4416.79  976.52
   2   0 -10 5167.92  493.82
   2   0  10 5124.86  466.36
   2   0  11 1642.83  419.59
  -2   0 -11 2281.58  332.73
   2   0 -11 1784.85  350.90
  -2   0 -11 1813.26  967.74
   2   0 -11 1661.34  650.67
  -2   0 -11 1784.62  607.28
   2   0 -11 2304.39  723.51
   2   0  11 1886.34  301.39
   2   0  11 2801.77  448.98
  -2   0 -12 1474.11  438.46
   2   0 -12 1576.91  395.75
  -2   0 -12  746.29  185.57
   2   0 -12  811.31  275.86
  -2   0 -12  546.80  288.89
   2   0 -12  557.47  368.46
  -2   0  12  646.94  320.95
  -2   0  12  190.83  247.06
  -2   0 -12  553.38  242.92
   2   0 -12  758.16  277.07
  -2   0 -12  587.22  209.52
  -2   0 -12 1391.32  309.44
  -2   0  13 4600.22 1459.46
   2   0 -13 5204.23  777.01
  -2   0 -13 3408.32 1049.45
   2   0 -13 2890.49  985.69
  -2   0 -13 3083.79 1137.57
   2   0  13 4384.53  700.31
  -2   0  13 3937.76  617.46
  -2   0  13 5195.93 1333.03
  -2   0 -13 4602.75  841.85
   2   0 -13 3059.83  510.43
  -2   0 -13 3658.32  534.99
   2   0 -13 3666.05  525.02
  -2   0 -13 4307.33 1243.24
  -2   0  14 -154.74  218.85
  -2   0  14  375.51  196.10
  -2   0 -14  428.89  197.64
   2   0 -14  419.06  225.01
  -2   0 -14  692.00  249.75
   2   0 -14  428.37  257.31
  -2   0 -14   77.13  133.47
  -2   0  15 1523.31  269.74
  -2   0  15 1091.45  271.28
  -2   0 -15 1991.25  391.66
   2   0 -15 1538.42  313.93
  -2   0 -15 1367.10  325.70
   2   0  15 1765.23  395.24
  -2   0  1621304.74  847.48
  -2   0  1619417.20  770.47
  -2   0 -1618639.80  747.52
   2   0 -1617488.70  711.56
  -2   0 -1618314.47  742.92
   2   0  1621942.44  900.65
  -2   0  17 3431.98  728.59
  -2   0  17 3931.55  619.90
  -2   0 -17 3777.99  401.59
   2   0 -17 3877.42  366.30
  -2   0 -17 3383.28  348.47
   2   0  17 2943.13  363.91
  -2   0  18 6220.37  954.64
  -2   0  18 6495.60  992.59
  -2   0 -18 5230.04  381.24
   2   0 -18 5358.13  353.38
   2   0  18 5790.16  453.26
  -2   0  19 4010.29  677.45
  -2   0  19 2897.20  827.04
  -2   0 -19 3620.19  468.31
   2   0 -19 4235.56  525.21
   2   0  19 3173.21  817.89
  -2   0  20  278.12  148.38
  -2   0  20   60.83   78.25
  -2   0 -20  101.22  111.65
   2   0 -20    9.25  111.59
   2   0  20    2.41   90.53
  -2  -1   0  548.05  151.91
  -2   1   0  627.88  125.71
  -2  -1   0  599.23  173.58
  -2   1   0  579.16  203.35
  -2  -1   0  825.66  313.27
  -2   1   0  690.65  205.81
  -2  -1   0  732.28  242.53
  -2   1   0  707.49  274.57
  -2  -1   0  623.82  204.38
  -2   1   0  458.91  134.16
  -2   1   0  566.57  132.38
  -2  -1   0  610.26  177.84
  -2  -1   0  624.76  207.52
   2  -1   0  738.79  183.97
  -2  -1   0  436.67  164.88
   2  -1   0  805.67   61.60
  -2  -1   139001.66  696.21
  -2   1   139951.04  772.74
  -2   1  -139278.38  741.32
  -2  -1   139602.51  705.97
  -2   1   139045.00  796.96
  -2   1  -140897.71  790.85
  -2  -1  -141259.10  771.66
  -2  -1   138706.85  787.81
  -2   1  -141654.76  779.69
  -2   1   138127.86  785.87
  -2  -1   137494.34  789.44
  -2  -1  -138743.50  769.58
  -2   1   138652.69  784.14
  -2   1  -138826.71  798.10
  -2   1   138880.17  929.12
  -2   1  -139705.28  813.83
  -2  -1  -138662.09  817.70
  -2  -1   139007.04  767.28
  -2   1  -139000.73  841.38
  -2  -1  -139576.56  884.69
   2  -1  -136265.98  775.92
  -2  -1   138810.07  749.53
  -2  -1  -138667.28  810.95
   2  -1  -139137.83  756.22
   2  -1   137242.21  767.81
  -2  -1  -137858.66  750.40
  -2  -1   138483.51  754.09
   2  -1   141014.57  736.28
  -2  -1   234458.78  671.98
  -2   1   235663.44  754.89
  -2   1  -236549.38  712.83
  -2  -1   236158.80  707.47
  -2   1   236116.35  765.16
  -2  -1  -237772.91  631.51
  -2   1  -235176.05  728.98
  -2  -1  -235786.99  677.02
  -2  -1   235094.53  883.26
  -2   1  -237424.33  676.21
  -2   1   236305.98  802.92
  -2  -1   236384.12  764.25
  -2  -1  -234414.33  706.83
  -2   1   236596.01  765.00
  -2   1  -234643.09  853.05
  -2   1  -235882.42  771.64
  -2  -1  -234057.85 1001.99
   2   1  -235511.88  791.87
   2  -1  -233106.81  757.43
  -2   1  -237092.99  778.10
  -2  -1  -232777.58  723.12
   2  -1  -235318.03  790.07
   2   1  -237161.70  812.33
  -2  -1  -235976.05  805.20
   2  -1  -237522.45  723.30
   2  -1   234905.20  769.29
   2   1  -236992.96  672.19
  -2  -1   233703.70  665.01
   2  -1   234870.41  691.36
   2   1   235098.69  739.83
   2   1   315168.67  316.96
  -2  -1   312775.65  406.18
  -2   1   313837.68  445.50
  -2   1  -313701.39  407.56
  -2  -1   313301.91  425.10
  -2   1   314359.84  582.63
  -2  -1  -314730.36  404.67
  -2   1  -313414.22  438.85
  -2  -1  -314429.56  426.78
  -2  -1   314031.31  496.70
  -2   1  -314268.73  308.11
  -2   1   312653.00  520.16
  -2  -1   314142.08  563.76
  -2   1   313947.73  439.07
  -2  -1  -313756.90  586.90
  -2   1  -313969.90  488.91
  -2   1  -314291.37  453.79
   2  -1  -314099.15  495.23
   2   1  -314024.44  461.96
  -2   1  -313319.82  436.09
  -2  -1  -313184.97  432.24
   2  -1  -313882.21  453.05
   2   1  -312968.56  443.47
   2  -1  -314420.24  384.42
   2   1  -314712.41  308.75
   2  -1   313520.96  450.93
  -2  -1   313972.77  388.79
   2  -1   313508.45  412.57
   2   1   313173.26  438.69
   2  -1   4 8406.02  324.73
   2   1   4 8636.68  264.98
  -2  -1   4 7859.38  681.64
  -2   1   4 7778.50  883.53
  -2  -1   4 7695.40  533.98
  -2   1   4 8142.93  372.04
  -2   1  -4 7862.98  354.38
  -2  -1  -4 8117.15  286.58
  -2  -1   4 7878.20  377.17
  -2   1   4 7737.34  425.52
   2   1   4 8859.08  267.79
  -2  -1   4 8277.06  465.06
  -2   1   4 8223.03  357.90
  -2  -1  -4 8506.12  328.01
  -2   1  -4 7820.91  378.18
  -2   1  -4 7809.12  367.93
  -2  -1  -4 8341.37  388.26
   2  -1  -4 7988.23  414.44
   2   1  -4 7646.12  386.52
  -2   1  -4 8663.71  842.82
  -2  -1  -4 7928.43  352.68
   2  -1  -4 8106.35  400.60
   2   1  -4 7361.27  355.33
  -2  -1  -4 7138.67  410.66
   2  -1  -4 9082.25  287.16
   2  -1   4 7195.83  343.85
  -2  -1   4 7898.02  319.74
  -2   1   4 8850.98  260.85
   2  -1   4 7809.64  364.57
   2   1   4 7807.59  371.07
   2  -1   551941.63 1694.29
   2   1   553174.66 1724.90
  -2  -1   550692.10 1720.32
  -2   1   552079.76 1757.34
  -2   1   551766.69 1807.62
  -2   1  -550903.52 1705.52
  -2  -1  -552806.76 1711.79
  -2  -1   550833.38 1806.44
  -2   1   549956.84 1784.75
  -2  -1   550148.36 1678.34
  -2   1   553008.23 1760.34
  -2  -1  -552262.75 1710.58
  -2   1  -551223.39 1718.37
  -2  -1  -553490.82 1793.00
  -2   1  -551747.33 1776.73
   2   1  -552449.67 1779.91
   2  -1  -555267.43 1864.41
  -2   1  -550455.05 1713.84
  -2  -1  -553777.48 1820.34
   2  -1  -551133.84 1736.16
   2   1  -553651.83 1788.72
  -2  -1  -554226.59 1851.62
   2  -1  -559699.65 1862.61
   2  -1   551432.23 1741.06
  -2  -1   554810.50 1799.85
  -2   1   555269.06 1755.51
   2  -1   552066.29 1746.22
   2   1   553611.73 1804.58
   2  -1   6 2619.12  223.56
   2   1   6 2617.15  210.88
  -2  -1   6 2395.42  661.44
  -2   1   6 2545.30  874.83
  -2   1   6 2847.97  278.07
  -2   1  -6 2664.28  284.10
  -2  -1  -6 2993.29  233.55
   2   1  -6 2553.46  239.46
  -2  -1   6 3041.66  974.15
  -2   1   6 2798.68  903.73
  -2   1   6 2393.43  221.65
  -2  -1  -6 3390.09  252.34
  -2   1  -6 3041.56  309.23
   2   1  -6 2950.89  324.18
  -2  -1  -6 2593.08  266.37
  -2   1  -6 2588.31  273.81
   2   1  -6 2308.08  284.03
   2  -1  -6 2802.69  333.99
  -2   1  -6 2227.50  670.63
  -2  -1  -6 3335.56  837.62
   2  -1  -6 3093.06  297.62
   2   1  -6 3645.65  331.45
  -2  -1  -6 2765.57  574.97
   2  -1   6 2475.27  290.78
  -2  -1   6 2714.79  794.77
   2  -1   6 3222.56  325.73
   2   1   6 3576.56  360.94
   2  -1   719206.50  782.31
   2   1   718720.02  739.17
  -2  -1   717097.18  721.01
  -2   1   717010.96  799.72
  -2   1   718374.14  792.93
  -2   1  -716714.57  709.04
  -2  -1  -718033.20  709.77
   2   1  -716886.78  722.25
  -2  -1   716333.45  678.70
  -2   1   718323.39  763.15
  -2   1  -717525.32  706.29
   2   1  -717989.01  795.51
   2  -1  -717823.24  733.49
  -2  -1  -716075.46  731.53
  -2   1  -719165.91 1096.75
   2   1  -718061.73  799.33
   2  -1  -717464.94  743.25
  -2   1  -719232.01 1537.54
  -2  -1  -718938.69  833.05
   2  -1  -718690.14  793.60
   2   1  -717568.78  734.54
  -2  -1  -719406.35  805.36
   2  -1   717572.25  732.83
  -2  -1   717755.74  714.19
  -2   1   717235.33  661.27
   2  -1   716989.04  734.83
   2   1   718174.22  785.22
   2  -1   834033.11 1687.59
   2   1   832713.39 1120.25
  -2  -1   829533.42 1364.66
  -2   1   828104.49 1372.98
  -2   1  -830087.19 1117.90
  -2  -1  -829557.93 1065.96
   2   1  -830963.56 1160.57
  -2  -1   832899.93 1187.91
  -2   1   828613.56 1074.39
  -2   1  -832426.43 1187.56
   2   1  -830187.64 1182.82
   2  -1  -831964.30 1180.63
  -2   1  -830392.84 1153.85
  -2  -1  -828071.94 1345.14
   2  -1  -828189.00 1096.41
   2   1  -830551.96 1159.57
  -2   1  -828381.22 1071.14
  -2  -1  -830600.50 2237.44
   2  -1  -830654.47 1150.70
   2   1  -832659.20 1179.96
  -2  -1  -830007.33 1122.44
   2  -1   830708.62 1132.71
  -2  -1   830737.10 1101.41
  -2   1   828928.75 1017.62
   2  -1   831749.52 1187.39
   2   1   828226.40 1075.04
   2  -1   9  123.75  167.75
   2   1   9  129.38  197.02
  -2  -1   9  421.86  231.19
  -2   1  -9  369.84  166.06
  -2  -1  -9  387.98  110.90
   2   1  -9   -7.50  211.85
   2  -1  -9  392.55  189.88
  -2  -1   9  527.90  224.83
  -2   1   9  286.50  107.94
  -2   1  -9  314.53   80.82
   2   1  -9  357.52  179.95
  -2   1  -9  339.12  149.50
  -2  -1  -9  485.97  173.38
   2   1  -9  442.82  241.66
   2  -1  -9  372.79  211.99
  -2   1  -9 -205.14  173.08
  -2  -1  -9  324.04  116.52
   2   1  -9 1156.53  220.01
   2  -1  -9  517.33  225.31
   2  -1   9  273.26  189.74
   2   1   9  336.46  174.60
  -2  -1   9  514.06  227.40
   2  -1   9  263.29  194.75
   2   1   9  394.99  213.46
   2  -1  1026976.41 1760.53
  -2  -1  1026235.62 2840.59
  -2   1 -1027675.16 1284.95
  -2  -1 -1027130.43 1233.95
   2   1 -1024625.37 1149.80
   2  -1 -1025355.16 1179.53
  -2  -1  1025773.31 1201.60
  -2   1  1025423.56 1653.06
   2   1 -1027930.42 1290.51
  -2  -1 -1026514.89 1273.23
  -2   1 -1026608.77 1238.43
   2   1 -1026736.38 1232.05
   2  -1 -1026383.62 1229.23
  -2   1 -1026240.55 1618.55
  -2  -1 -1027192.32 1299.28
   2  -1 -1026515.94 1230.60
   2   1 -1028997.87 1284.78
   2  -1  1026601.14 1208.98
   2   1  1026087.16 1219.48
  -2  -1  1024611.44 1222.60
   2  -1  1026494.26 1220.76
   2   1  1026028.81 1219.56
   2  -1  11 2666.48 1078.15
  -2  -1  11 4060.16 1087.69
  -2   1  11 4402.28 1066.60
  -2   1 -11 3883.73  468.39
   2   1 -11 3679.31  390.53
   2  -1 -11 4442.21  460.36
  -2   1 -11 4117.07 1458.66
  -2  -1 -11 4692.82 1452.51
   2   1 -11 4934.22  454.77
   2  -1 -11 3902.19  412.50
  -2   1 -11 3087.76  892.05
  -2  -1 -11 3349.72 1130.15
   2   1 -11 3697.18  665.30
   2  -1 -11 4170.18  419.14
   2   1  11 3242.54  395.11
   2  -1  11 3938.70  441.35
  -2  -1  12  269.90  227.68
  -2   1  12 -107.02  305.50
  -2   1 -12  459.71  361.51
   2   1 -12  810.58  280.14
   2  -1 -12  533.10  332.03
  -2   1 -12  270.66  231.28
  -2  -1 -12  130.78  211.86
   2  -1 -12 -132.83  261.10
   2   1 -12   45.11  244.97
  -2   1 -12  129.24  204.21
  -2  -1 -12  431.43  258.92
   2  -1 -12   79.49  154.51
   2  -1  12  714.93  437.18
   2   1  12  417.52  306.54
  -2  -1  12    7.86  208.02
  -2   1  12  368.28  243.07
  -2  -1  12  455.19  144.59
  -2   1  12  276.58  196.57
  -2  -1 -12  118.68  165.30
  -2   1 -12  741.30  277.60
   2  -1 -12  233.51  128.64
   2   1 -12  537.69  127.48
  -2  -1 -12  558.32  271.51
   2  -1 -12  451.61  192.97
  -2   1 -12  881.39  282.52
  -2  -1 -12  338.01  276.31
  -2   1  13 2082.47  679.73
  -2   1 -13 2888.48  667.07
   2   1 -13 3027.30  548.74
  -2  -1 -13 2615.44 1018.91
  -2   1 -13 3280.50 1069.17
   2   1 -13 2383.87  899.97
   2  -1 -13 2833.24  941.81
  -2  -1 -13 1974.89  705.41
   2  -1 -13 2421.80  765.29
   2  -1  13 3773.26  621.94
   2   1  13 3827.25  659.06
  -2  -1  13 3441.65  515.30
  -2   1  13 3206.02  502.50
   2  -1  13 2246.52  480.97
  -2  -1  13 2892.74  810.59
  -2   1  13 4193.75  860.54
  -2  -1 -13 2678.00  550.89
  -2   1 -13 3216.85  470.58
   2   1 -13 3527.94  528.43
   2  -1 -13 2534.17  399.77
  -2   1 -13 3079.27  497.86
  -2  -1 -13 2518.45  445.71
   2  -1 -13 3141.23  466.83
  -2   1 -13 3338.87 1022.05
  -2  -1 -13 3575.73  888.26
  -2  -1  14  825.27  286.21
  -2   1  14  551.95  226.92
   2  -1  14  659.67  278.39
  -2  -1  14 1244.38  232.32
  -2   1  14  819.18  244.73
  -2   1 -14 1659.35  328.83
  -2  -1 -14 1145.16  315.65
   2   1 -14  677.01  271.08
   2  -1 -14  725.23  327.51
  -2   1 -14 1248.92  337.94
  -2  -1 -14  781.83  237.80
   2  -1 -14  694.06  228.09
  -2  -1 -14 1215.70  451.16
   2  -1  14  720.43  360.42
  -2  -1  15 5102.73  515.96
  -2   1  15 5361.86  495.07
   2  -1  15 4403.64 1114.92
  -2  -1  15 5197.48 1044.18
  -2   1  15 5619.71 1029.30
  -2  -1 -15 5800.18  951.61
  -2   1 -15 4895.69  439.43
   2  -1 -15 4960.70  494.84
   2   1 -15 4463.43  452.55
  -2  -1 -15 5932.88  531.50
   2  -1 -15 5085.26  701.39
  -2  -1 -15 5387.57  768.60
   2  -1  15 4837.10  607.54
  -2  -1  16 4206.35  831.27
  -2   1  16 5419.59  918.42
   2  -1  16 3489.99  708.22
  -2  -1  16 3836.00  708.63
  -2   1  16 4704.82  802.77
  -2   1 -16 3745.32  370.05
  -2  -1 -16 4528.55  396.41
   2  -1 -16 4796.73  896.07
   2   1 -16 4001.73  733.51
  -2  -1 -16 4717.71  429.75
   2  -1 -16 4350.33  589.74
   2   1  16 4260.73  574.88
   2  -1  16 4586.01  965.52
  -2  -1  17 5102.64 1034.14
  -2   1  17 5052.68  483.05
  -2  -1  17 4556.53  784.94
  -2   1  17 5061.27  739.33
  -2   1 -17 5165.70  450.06
  -2  -1 -17 4901.94  412.03
   2   1 -17 5168.18  403.85
   2  -1 -17 4299.11  394.96
  -2  -1 -17 4572.36  384.17
   2  -1 -17 5350.86  454.44
   2  -1  17 4515.73  419.48
   2   1  17 5181.31  481.10
  -2  -1  18 1239.73  343.02
  -2   1  18 1724.78  298.05
  -2  -1  18 1252.01  218.42
  -2   1  18 1126.90  308.18
  -2  -1 -18  879.10  258.85
  -2   1 -18 1047.23  229.01
   2   1 -18 1300.01  257.46
   2  -1 -18  923.84  233.63
  -2  -1 -18 1022.64  208.00
   2   1  18  759.47  265.07
   2  -1  18  931.61  395.04
  -2   1  19  562.21  231.43
  -2  -1  19  431.58  106.27
  -2  -1  19  322.70  173.21
  -2   1  19  238.44   85.78
  -2  -1 -19  240.04  141.19
  -2   1 -19  457.18  142.25
   2   1 -19  651.98  202.61
   2  -1 -19  459.75  196.35
   2  -1  19  315.11  153.01
   2   1  19  474.18  180.69
  -2  -1  20 3487.68 1257.90
  -2   1  20 5031.93 1304.90
  -2  -1  20 5969.18 1012.81
  -2   1  20 5477.18 1218.62
  -2   1 -20 7072.89 1205.16
  -2  -1 -20 6741.34 1146.18
   2   1 -20 5443.91  931.22
   2  -1 -20 5561.80  946.68
   2  -1  20 6228.47 1067.27
  -2   2   0 7467.11  320.33
   2   2   0 7400.58  171.75
  -2   2   0 6529.18  292.58
   2   2   0 7494.76  161.87
  -2  -2   0 6567.45  279.60
  -2   2   0 6398.06  310.09
  -2  -2   0 6707.93  279.88
  -2   2   0 7523.38  322.23
  -2  -2   0 6502.81  538.94
  -2   2   0 6711.55  354.40
  -2  -2   0 6765.06  293.55
   2  -2   0 6106.85  288.43
  -2  -2   0 6889.72  304.52
   2  -2   0 6716.78  317.28
  -2  -2   0 6181.38  334.77
   2  -2   0 7200.84  189.96
  -2  -2   1 5895.95  194.14
  -2   2   1 5507.91  257.54
  -2   2  -1 6112.49  281.68
  -2   2   1 6203.14  283.00
  -2   2  -1 5657.33  273.79
  -2  -2  -1 6149.77  262.58
  -2  -2   1 5754.95  270.37
  -2   2  -1 5983.94  243.80
  -2   2   1 6241.75  312.58
  -2  -2   1 6154.59  305.65
  -2  -2  -1 6122.75  276.96
  -2   2   1 6634.15  280.79
  -2   2  -1 6536.46  508.23
  -2  -2   1 6269.52  297.48
  -2   2   1 7002.93  288.49
  -2   2  -1 5973.17  266.74
  -2  -2  -1 5858.72  269.08
  -2   2  -1 5568.01  259.77
  -2  -2   1 6203.50  269.95
  -2  -2  -1 5888.73  284.74
   2  -2  -1 6025.37  305.15
  -2  -2  -1 6701.75  695.24
  -2  -2   1 6486.32  259.94
   2  -2  -1 5859.46  267.07
   2  -2   1 5504.18  267.63
  -2  -2  -1 5479.92  564.08
  -2  -2   1 5743.58  291.06
   2  -2   1 6608.04  238.53
  -2  -2   2 3980.09  251.24
  -2   2   2 3713.08  234.44
  -2   2  -2 3753.67  262.97
  -2   2   2 4615.16  289.59
  -2   2  -2 3832.38  226.25
   2   2  -2 4263.06  212.21
  -2  -2  -2 4160.19  208.82
  -2  -2   2 3879.47  245.27
  -2   2  -2 4348.79  202.49
  -2   2   2 3558.76  295.54
  -2  -2   2 3492.20  223.84
  -2  -2  -2 4270.04  318.87
  -2   2   2 3785.12  221.19
  -2   2  -2 4158.08  255.21
  -2   2  -2 4095.62  341.48
  -2  -2  -2 3991.29  639.12
   2  -2  -2 4276.19  256.82
   2   2  -2 3788.19  269.94
  -2   2  -2 3893.25  227.72
  -2  -2  -2 3946.39  236.05
   2  -2  -2 3822.12  259.56
   2   2  -2 4318.65  235.62
  -2  -2   2 4165.15  192.55
  -2  -2  -2 4150.68  264.50
   2  -2  -2 4104.49  246.86
   2  -2   2 4080.96  248.51
  -2  -2  -2 4375.84  282.08
  -2  -2   2 4117.97  254.93
   2  -2   2 4161.42  225.37
   2   2   323277.31  400.37
  -2  -2   321131.32  771.38
  -2   2   320018.96  569.28
  -2   2  -322028.50  599.53
  -2   2   320479.83  573.57
  -2   2  -319800.40  565.08
   2   2  -322080.80  545.26
  -2  -2   321501.94  602.38
  -2   2  -323378.49  482.03
  -2   2   321119.74  587.30
   2   2   323657.63  601.88
  -2  -2   320190.95  606.68
  -2   2   321239.35  564.27
  -2   2  -320589.13  583.03
  -2   2  -320980.10  573.08
  -2  -2  -319532.59  804.71
   2  -2  -321796.37  610.69
   2   2  -321394.99  613.45
  -2   2  -321256.88  599.31
  -2  -2  -322505.60  615.31
   2  -2  -320775.32  609.83
  -2  -2   323420.58  456.84
  -2  -2  -320179.18  603.98
   2  -2  -323376.67  558.32
   2  -2   321244.17  597.04
  -2  -2  -320832.82  954.69
  -2  -2   322304.06  576.08
   2  -2   321758.66  572.57
   2   2   423168.25  569.18
  -2  -2   420490.32  594.07
  -2   2   421979.13  637.31
  -2   2  -422443.21  627.20
  -2   2   421627.80  637.36
  -2   2  -422065.04  631.42
  -2  -2  -423516.63  504.15
   2   2  -422046.43  607.06
  -2  -2   421389.77  857.45
  -2   2   420156.11  608.13
  -2   2   422712.50  587.38
  -2  -2  -420439.90  518.88
  -2   2  -421690.91  633.35
   2   2  -421512.14  699.88
  -2   2  -421401.79  617.85
  -2  -2  -420607.90  595.02
   2  -2  -421249.49  619.92
   2   2  -420650.55  608.70
  -2   2  -421866.82  608.50
  -2  -2  -420511.45  594.73
   2  -2  -420560.70  627.23
   2   2  -422698.76  593.48
  -2  -2  -420442.12  698.72
   2  -2  -422693.95  560.72
   2  -2   420695.35  617.99
  -2  -2   420557.30  590.62
   2  -2   421740.85  626.78
   2   2   422143.51  648.65
   2  -2   521051.52  821.92
   2   2   522429.97  794.18
  -2  -2   521976.09  877.59
  -2   2   522256.57  901.66
  -2   2   519966.16  816.99
  -2   2  -521769.91  864.89
  -2  -2  -523118.26  819.28
   2   2  -522406.02  888.17
  -2  -2   521874.39  864.25
  -2   2   521030.59  906.71
   2   2   525383.03  887.21
  -2   2   522572.28  838.94
  -2  -2  -521052.62  755.30
  -2   2  -521521.19  842.44
   2   2  -520638.78  888.65
  -2  -2  -520049.72  803.11
  -2   2  -520480.78  831.84
   2   2  -521409.28  858.73
   2  -2  -520533.40  844.96
  -2   2  -522041.38  909.38
  -2  -2  -522045.98  877.75
   2  -2  -520922.99  866.38
   2   2  -520822.57  795.79
  -2  -2  -520820.76 1168.09
   2  -2  -525540.89  906.24
   2  -2   522959.26  914.24
  -2  -2   523708.50  932.23
  -2   2   524143.92  829.67
   2  -2   521677.32  854.08
   2   2   522826.25  916.40
   2  -2   646662.15 1667.66
   2   2   648648.16 1850.64
  -2  -2   648387.33 1686.61
  -2   2   644537.76 1599.18
  -2   2   649140.97 1740.25
  -2   2  -647952.75 1668.82
  -2  -2  -650524.53 1671.58
   2   2  -646683.86 1631.48
  -2  -2   648713.64 1685.37
  -2   2   647394.88 1677.92
  -2   2   649999.51 1668.87
  -2   2  -648318.84 1671.75
   2   2  -650281.03 1802.02
  -2   2  -642647.13 1523.10
  -2  -2  -642921.50 1619.10
   2  -2  -645947.81 1631.19
   2   2  -646173.62 1627.53
  -2   2  -648803.73 1685.16
  -2  -2  -647204.74 1782.58
   2   2  -651084.79 1722.01
   2  -2  -646442.74 1644.94
  -2  -2  -648962.61 1737.57
   2  -2  -651612.74 1681.92
   2  -2   649230.52 1714.61
  -2  -2   650743.15 1739.36
  -2   2   649225.08 1610.10
   2  -2   650365.86 1752.07
   2   2   649428.47 1731.46
   2  -2   7 1849.33  377.08
   2   2   7 1361.91  429.79
  -2  -2   7 2126.69  970.97
  -2   2   7 1241.59  601.59
  -2   2   7 1789.83  378.07
  -2   2  -7 1538.85  241.08
  -2  -2  -7  923.30  411.72
   2   2  -7 1753.23  268.97
  -2  -2   7 1642.91  290.65
  -2   2   7 1765.84  401.93
  -2   2  -7 1798.64  277.19
   2   2  -7 1922.62  314.02
   2  -2  -7 1927.36  236.98
  -2  -2  -7 1574.60  524.09
  -2   2  -7 1842.65  596.29
   2   2  -7 1975.55  272.35
   2  -2  -7 2021.47  356.01
  -2   2  -7 1537.31  415.88
  -2  -2  -7 1620.09  265.36
   2  -2  -7 1856.15  333.04
   2   2  -7 1499.07  189.95
  -2  -2  -7 2271.29  560.33
   2  -2   7 1970.11  265.85
  -2  -2   7 1310.58  430.09
   2  -2   7 1566.32  256.92
   2   2   7 1517.94  246.94
   2  -2   848025.09 2383.56
  -2  -2   843192.43 1918.03
   2   2   851146.83 1676.54
  -2   2   847447.45 1719.85
  -2   2  -842034.11 1515.05
  -2  -2  -845860.80 1548.32
   2   2  -846354.86 1622.65
  -2  -2   844151.35 1628.55
  -2   2   848767.35 1691.76
  -2   2  -849291.29 1691.20
   2   2  -844778.56 1624.40
  -2   2  -843631.89 1545.18
  -2  -2  -846126.80 1622.93
   2  -2  -842440.63 1539.73
   2   2  -843097.04 1527.13
  -2   2  -846738.63 1908.48
  -2  -2  -847994.48 1699.72
   2  -2  -847731.91 1666.75
   2   2  -844521.54 1527.99
  -2  -2  -851754.81 2431.90
   2  -2   849397.15 1697.94
  -2  -2   846272.11 1599.57
   2  -2   846993.88 1669.75
   2   2   847626.58 1671.80
   2  -2   9 8932.25  545.89
  -2  -2   9 9503.78 2197.35
  -2   2   9 8946.18  586.52
  -2   2   9 9435.45  602.17
  -2   2  -9 8639.59  554.11
  -2  -2  -9 8878.92  530.02
   2   2  -9 9041.97  590.09
  -2  -2   910752.47  624.31
  -2   2   9 8795.47  544.36
  -2   2  -910102.92  583.57
   2   2  -9 8482.31  602.67
  -2   2  -9 9120.70  579.60
  -2  -2  -9 8853.97  575.88
   2   2  -9 9900.80  618.92
   2  -2  -910428.74  656.82
  -2   2  -9 9464.77  556.51
  -2  -2  -9 9043.65  587.55
   2   2  -9 9547.37  586.72
   2  -2  -910221.78  637.43
  -2  -2  -9 9525.89  636.75
   2  -2   9 8843.78  539.47
  -2  -2   9 9408.81  991.88
   2  -2   9 9672.97  603.64
   2  -2  10 4775.28 1199.33
  -2  -2  10 6570.96 1719.88
  -2   2  10 6489.44 1760.94
  -2   2 -10 4905.98  465.38
   2   2 -10 8253.87  588.29
  -2  -2  10 6024.65 1507.38
  -2   2  10 5558.56 1163.70
   2   2 -10 6955.78  582.40
  -2  -2 -10 7870.42 1146.69
  -2   2 -10 7316.17  628.22
   2  -2 -10 7041.67  648.00
   2   2 -10 6802.12 1548.06
  -2   2 -10 6459.94 1689.21
  -2  -2 -10 7941.78  618.16
   2  -2 -10 8232.88  625.79
  -2  -2 -10 7128.34  566.02
   2  -2  10 6978.68  540.00
  -2  -2  10 5671.74  462.07
   2  -2  10 6304.48  543.64
   2   2  10 7571.89  612.16
   2  -2  11 2731.07  756.16
  -2  -2  11 2824.71  755.83
  -2   2  11 3130.47  879.50
  -2   2 -11 3152.87  444.68
   2   2 -11 3449.81  420.21
   2  -2 -11 2512.92  330.81
  -2   2  11 2473.45  900.00
   2   2 -11 2293.02  353.91
  -2   2 -11 3621.32  850.93
  -2  -2 -11 2374.63  620.17
   2   2 -11 2981.88  365.57
   2  -2 -11 3873.69  440.77
  -2   2 -11 2478.87  701.33
  -2  -2 -11 3534.75  862.12
   2  -2 -11 3196.43  402.55
   2   2  11 2269.07  333.65
  -2  -2  11 2730.33  830.79
   2  -2  11 4045.50  434.96
   2   2  11 3264.34  387.34
   2  -2  12 3734.85 1463.88
  -2  -2  12 4728.24 1658.23
  -2   2  12 5358.18  816.60
  -2   2 -12 4578.14  644.23
   2   2 -12 5581.88  753.63
   2  -2 -12 8180.40  985.92
  -2   2 -12 5020.33 1152.42
  -2  -2 -12 4584.90  950.19
   2  -2 -12 4859.22 1080.00
   2   2 -12 6080.60 1886.32
  -2  -2 -12 6280.99 1057.25
   2  -2 -12 4187.70 1655.01
   2  -2  12 5754.28  749.28
   2   2  12 5852.00  788.37
  -2  -2  12 4843.94  620.07
  -2   2  12 5963.39  719.06
   2  -2  12 4979.23 1022.92
  -2  -2  12 5454.07 1047.34
  -2   2  12 5193.06 1053.69
  -2  -2 -12 5280.04 1156.49
  -2   2 -12 5958.59  860.48
   2   2 -12 4827.02  609.23
   2  -2 -12 5623.06  692.20
  -2  -2 -12 5352.86  781.13
   2  -2 -12 5232.46  648.40
  -2  -2 -12 5200.61 1244.86
  -2  -2  13 6813.25 2166.93
  -2   2 -13 9182.74 1241.20
   2   2 -13 8167.26 1117.99
  -2  -2 -13 7152.52 2307.60
  -2   2 -13 6893.97 2410.59
   2   2 -1310302.81 1298.44
   2  -2 -1310699.58 1313.05
  -2  -2 -13 5882.87 2732.91
   2  -2 -13 8401.35 1626.66
   2   2  1310445.73 1291.21
   2  -2  13 7317.80 1646.24
  -2  -2  1310062.89 1184.25
  -2   2  13 8526.16 1022.14
   2  -2  13 6495.26 1600.31
  -2  -2  13 8252.89 1557.16
  -2   2  1310195.57 1964.12
  -2  -2 -13 7503.85  913.09
  -2   2 -13 8383.51  983.82
   2  -2 -13 7758.47  955.82
   2   2 -13 8900.34 1048.52
  -2  -2 -13 7316.73  887.60
   2  -2 -13 7627.64  931.45
  -2  -2 -13 8713.46 1863.36
   2  -2  1310840.86 2030.03
   2  -2  14 3883.80 1083.04
  -2  -2  14 4815.58  478.13
  -2   2  14 3314.83  413.38
   2  -2  14 3994.45 1148.44
  -2  -2  14 3602.97  710.80
  -2   2  14 4529.07  750.35
  -2   2 -14 4568.38  904.13
  -2  -2 -14 4887.56 1444.59
   2   2 -14 3681.29  417.26
   2  -2 -14 4088.84  483.65
  -2  -2 -14 5034.15  484.32
   2  -2 -14 4198.81  459.58
  -2  -2 -14 4133.59  862.58
   2  -2  14 4417.97  516.30
   2  -2  15 4887.80  932.74
  -2  -2  15 8182.09 1374.95
  -2   2  15 8540.99  615.10
   2  -2  15 5153.53 1189.06
  -2  -2  15 6876.04 1173.56
  -2   2  15 7223.26  767.00
  -2  -2 -15 8041.98 1535.17
  -2   2 -15 7026.98  515.86
   2   2 -15 6789.10  724.76
   2  -2 -15 5084.96  507.54
  -2  -2 -15 7410.05  590.31
   2  -2 -15 5755.36  471.95
  -2  -2 -15 6743.61 1549.97
   2  -2  15 6191.73 1061.61
  -2  -2  16 1738.49  326.62
  -2   2  16 2652.47  337.88
   2  -2  16 1533.72  577.04
  -2  -2  16 3417.49  641.01
  -2   2  16 3769.32  624.40
  -2  -2 -16 2354.95  827.48
  -2   2 -16 2698.76  669.93
   2  -2 -16 2724.70  480.73
   2   2 -16 3062.34  385.47
  -2  -2 -16 2716.00  327.56
   2  -2 -16 2783.79  323.91
   2  -2  16 1577.26  329.11
  -2  -2  17 4659.33  580.58
  -2   2  17 4944.23  452.07
  -2  -2  17 5265.72  884.27
  -2   2  17 4899.27  703.23
  -2   2 -17 4840.21  382.42
  -2   2 -17 3959.97  383.44
  -2  -2 -17 4553.89  400.92
   2  -2 -17 3579.25  375.70
   2   2 -17 5416.32  459.56
  -2  -2 -17 4249.19  639.04
   2  -2 -17 4790.56  419.08
   2  -2  17 5518.41  695.12
   2   2  17 5719.71  444.74
  -2  -2  18  884.74  306.53
  -2   2  18  376.93  131.13
  -2  -2  18  827.08  248.13
  -2   2  18  785.21  167.49
  -2   2 -18  306.98  123.31
  -2   2 -18  412.04  169.20
  -2  -2 -18  693.14  228.08
   2   2 -18  790.29  222.64
   2  -2 -18  731.29  253.97
  -2  -2 -18  711.60  213.48
   2  -2 -18  422.10  174.73
   2  -2  18  511.07  187.44
   2   2  18  650.31  209.67
  -2  -2  19 4546.61  748.57
  -2   2  19 5217.08  848.83
  -2  -2  19 3579.11 1057.06
  -2   2  19 4621.51  771.10
  -2  -2 -19 4337.22  546.47
  -2   2 -19 4895.76  591.68
   2  -2 -19 3842.86  513.20
   2   2 -19 5000.99  607.62
  -2  -2 -19 2853.52  633.09
   2  -2  19 3741.79  487.36
   2   2  19 4015.18  734.11
  -2  -2  20  141.52  154.67
  -2   2  20  241.46  135.93
  -2  -2  20  179.59  130.01
  -2  -2 -20  181.66  158.30
  -2   2 -20  182.87  107.21
   2   2 -20  155.14  108.41
   2  -2 -20   43.93   90.56
   2  -2  20   69.25   59.65
  -2   3   0  300.63  170.99
   2   3   0  295.29   65.74
  -2   3   0  296.06  124.12
   2   3   0  314.30   37.14
  -2  -3   0  370.02  161.93
  -2   3   0  643.44  142.65
  -2  -3   0 1165.66  339.62
  -2   3   0  324.74  114.12
  -2  -3   0  320.50  148.12
  -2   3   0  466.82  180.49
  -2  -3   0  447.41  104.26
   2  -3   0  149.53  180.65
  -2  -3   0  457.90  134.95
   2  -3   0  312.52  135.16
  -2  -3   0  249.96  163.69
   2  -3   0  272.71   78.63
  -2  -3   1 1837.95  300.72
   2   3   1 2074.98   86.81
  -2   3   1 2393.08  263.81
  -2   3  -1 1699.63  201.82
  -2   3   1 1635.41  644.61
  -2   3  -1 1874.35  211.49
   2   3  -1 2124.30  138.91
  -2  -3  -1 1787.04  623.74
  -2  -3   1 1979.65  585.82
  -2   3  -1 1969.15  205.77
  -2   3   1 1353.36  177.67
  -2  -3   1 2017.81  610.19
  -2  -3  -1 1783.45  620.70
  -2   3   1 1890.64  579.95
  -2   3  -1 1877.71  532.30
  -2   3   1 2045.22  532.17
  -2   3  -1 1995.80  490.39
  -2  -3  -1 1639.16  151.40
   2   3  -1 1827.91  199.80
  -2  -3   1 1600.10  449.54
  -2  -3  -1 2252.90  638.84
   2  -3  -1 1902.31  229.80
   2  -3   1 1902.11  204.48
  -2  -3   1 1841.03  493.60
  -2  -3  -1 1541.91  254.07
   2  -3  -1 1658.19  180.68
   2  -3   1 1314.96  228.34
  -2  -3  -1 1598.15  522.80
   2  -3  -1 1887.84  104.67
  -2  -3   1 1947.39  518.56
   2  -3   1 1991.24  152.03
  -2  -3   222892.53  531.13
  -2   3   220901.11  605.29
  -2   3  -221092.56  580.49
  -2   3   221052.91  635.31
  -2   3  -222202.54  636.17
   2   3  -222505.77  516.85
  -2  -3  -220428.74  549.80
  -2   3  -221705.21  543.88
  -2   3   221888.44  656.53
  -2  -3  -221656.90  530.93
  -2   3   221954.23  570.72
  -2   3  -220885.15  603.03
  -2   3  -223410.45  607.53
  -2  -3  -221914.86  580.57
   2  -3  -221449.79  587.70
   2   3  -221895.07  575.42
  -2   3  -221062.01  678.56
  -2  -3  -222653.94  592.88
   2  -3  -220098.77  572.46
   2   3  -222540.98  559.72
  -2  -3  -221609.27  613.54
  -2  -3   221725.02  566.91
   2  -3  -222324.83  599.85
   2  -3   219960.00  577.38
  -2  -3  -221305.18  656.80
  -2  -3   220020.65  564.78
   2  -3   222523.98  552.38
  -2  -3   317411.82  488.83
  -2   3   317408.64  568.95
  -2   3  -317733.07  556.66
  -2   3   317401.37  569.62
  -2   3  -316796.60  543.40
   2   3  -317701.28  486.71
  -2  -3   316982.17  569.10
  -2   3   317922.78  583.05
  -2   3  -318510.72  472.50
   2   3   318038.93  545.74
  -2  -3  -318431.80  469.70
  -2   3   318743.75  523.97
  -2   3  -317323.93  571.78
   2   3  -318272.27  636.82
  -2  -3  -319177.06  563.14
  -2   3  -317880.75  548.20
   2   3  -316145.22  517.33
   2  -3  -316620.05  510.43
  -2   3  -318076.31  518.86
  -2  -3  -319392.57  579.52
   2  -3  -317458.63  552.66
   2   3  -319421.21  511.81
  -2  -3   319197.83  449.16
  -2  -3  -317801.90  627.71
   2  -3  -317742.70  510.88
   2  -3   318198.08  586.06
  -2  -3  -317419.89  541.06
  -2  -3   317021.09  917.81
   2  -3   318419.92  533.40
  -2  -3   4 1656.87  466.24
   2   3   4 1944.51  211.41
  -2   3   4 2046.01  282.86
  -2   3  -4 1700.82  196.65
  -2   3   4 2013.82  831.30
  -2   3  -4 1665.12  215.69
  -2  -3  -4 1887.82  314.77
   2   3  -4 1736.68  177.48
  -2  -3   4 2062.75  536.37
  -2   3   4 2061.05  259.20
  -2   3  -4 2252.30  178.13
   2   3   4 1821.61  197.77
  -2  -3  -4 1790.36  184.39
  -2   3   4 1992.52  659.37
  -2   3  -4 2220.84  326.18
   2   3  -4 1568.66  258.22
  -2  -3  -4 2201.90  214.28
  -2   3  -4 2116.56  612.97
   2   3  -4 2130.88  299.55
   2  -3  -4 2237.62  212.62
  -2   3  -4 2051.20  693.13
  -2  -3  -4 1712.31  720.64
   2  -3  -4 2012.10  247.10
   2   3  -4 2026.68  184.54
  -2  -3  -4 1880.78  649.24
   2  -3  -4 1902.07  202.86
   2  -3   4 2274.23  271.91
  -2  -3   4 1937.15  526.41
   2  -3   4 2101.82  355.70
   2   3   4 1993.37  242.82
  -2  -3   529524.00 1099.39
   2   3   530073.66 1023.80
  -2   3   527872.34 1073.50
  -2   3  -527882.19 1069.65
  -2   3   526756.14 1055.20
  -2   3  -529159.04 1130.15
   2   3  -531210.49 1152.83
  -2  -3   528411.48 1089.94
  -2   3   528450.89 1104.25
   2   3   531507.62 1120.08
  -2   3   530814.77 1345.75
  -2   3  -529131.03 1120.49
   2   3  -528484.53 1145.45
  -2  -3  -529203.40 1147.20
  -2   3  -527887.00 1050.22
   2   3  -529882.99 1127.56
   2  -3  -529917.04 1114.70
  -2   3  -530417.71 1117.86
  -2  -3  -527312.78 1059.02
   2   3  -533994.40 1176.43
  -2  -3  -529475.07 1379.37
   2  -3  -531373.93 1129.72
   2  -3   527730.03 1070.40
  -2  -3   529618.99 1112.44
   2  -3   528470.64 1080.54
   2   3   530438.77 1154.52
  -2  -3   620922.73  807.05
  -2   3  -621273.52  843.12
  -2   3   621819.73  890.58
  -2   3  -621339.13  859.66
   2   3  -621357.23  834.41
  -2  -3   620740.05  827.92
  -2   3   621599.60  889.56
  -2   3   623082.38  804.16
  -2   3  -621351.30  840.32
   2   3  -622017.68  959.56
  -2  -3  -621276.42 1124.38
  -2   3  -621755.64 1228.43
   2   3  -621088.52  820.63
   2  -3  -621900.66  855.84
  -2   3  -622881.48  976.39
  -2  -3  -621507.77  860.01
   2  -3  -623126.76  923.47
   2   3  -623650.51  833.25
  -2  -3  -621099.62  866.98
   2  -3  -624756.02  870.73
   2  -3   620658.20  817.37
  -2  -3   621617.99  873.48
   2  -3   619513.59  786.66
   2   3   621826.14  881.78
   2  -3   753261.59 1697.82
  -2  -3   751700.10 1785.64
  -2   3   753914.91 1769.48
  -2   3   751810.90 1904.19
  -2   3  -752325.62 1723.63
   2   3  -754230.91 1733.57
  -2  -3   753462.39 1706.12
  -2   3   751212.68 1688.54
  -2   3  -753148.00 1711.71
   2   3  -751532.60 1760.22
  -2   3  -755193.41 1888.00
  -2  -3  -754776.01 1747.38
   2   3  -752588.84 1687.34
   2  -3  -749718.92 1616.61
  -2   3  -755621.04 1738.00
  -2  -3  -757046.77 1843.71
   2   3  -756754.72 1743.81
   2  -3  -753045.42 1776.35
  -2  -3  -751735.74 1715.02
   2  -3   753655.68 1725.92
  -2  -3   751559.91 1668.26
   2  -3   754446.19 1762.22
   2   3   757717.55 1859.99
   2  -3   8 1999.38  557.18
  -2  -3   8 2472.39  625.28
  -2   3   8 1791.88  556.02
  -2   3   8 2393.30  764.18
  -2   3  -8 2368.19  283.64
   2   3  -8 1994.58  272.72
  -2  -3   8 2114.09  601.09
  -2   3   8 3171.60  976.35
  -2   3  -8 2395.86  338.42
   2   3  -8 2494.51  304.73
  -2  -3  -8 2441.99  683.95
  -2   3  -8 1862.37  603.73
   2  -3  -8 2451.78  304.24
   2   3  -8 2661.85  289.99
  -2   3  -8 2110.85  442.57
   2  -3  -8 1949.22  280.92
  -2  -3  -8 2261.42  742.66
   2  -3   8 2457.32  323.79
  -2  -3   8 1937.22  658.71
   2  -3   8 2619.49  400.26
   2  -3   949342.85 3731.23
  -2  -3   948436.04 1919.21
  -2   3   952010.13 1468.53
  -2   3   949336.95 2073.80
  -2   3  -946545.26 1862.71
   2   3  -947658.88 1872.96
  -2  -3   950456.02 1968.94
  -2   3   948231.73 2132.71
  -2   3  -949234.62 1936.65
   2   3  -950980.05 1523.93
  -2  -3  -949153.90 2228.53
  -2   3  -948495.48 1933.03
   2   3  -951281.96 1420.16
   2  -3  -946354.13 1826.33
  -2   3  -950439.90 1981.70
  -2  -3  -943585.50 1801.84
   2  -3  -949070.20 1935.52
  -2  -3  -952916.72 1511.26
   2  -3   949482.77 1911.58
  -2  -3   947511.81 1861.20
   2  -3   949197.22 1929.69
   2   3   948793.51 1921.26
   2  -3  1028692.68 1060.18
  -2  -3  1025783.61 1020.16
  -2   3  1029214.89 1369.12
  -2   3  1027471.07 1068.77
  -2   3 -1027028.12 1064.00
   2   3 -1027681.53 1037.15
  -2  -3  1027839.32 1128.79
  -2   3  1030500.26 1115.01
  -2   3 -1027089.76 1043.28
   2   3 -1027602.51 1145.52
  -2  -3 -1027359.39 1066.04
  -2   3 -1028258.69 1496.30
   2  -3 -1029070.39 1087.10
   2   3 -1029512.14 1092.66
  -2  -3 -1026703.60 1410.40
   2  -3 -1027083.41 1065.65
  -2  -3 -1029257.90 1125.23
  -2  -3  1028444.81 1088.75
   2  -3  1027365.54 1050.04
   2   3  1027834.66 1069.14
   2  -3  11 9549.75  913.89
  -2  -3  1110514.49  978.79
  -2   3  1111196.80 2309.59
  -2   3 -1112405.08 1118.55
   2   3 -1111515.03 1042.82
   2  -3 -1112310.96 1123.71
  -2   3  11 8256.91 2722.12
   2   3 -1110761.06  994.40
  -2   3 -1111264.91 2272.13
  -2  -3 -1111531.34 2611.21
   2   3 -1110303.95  951.74
   2  -3 -1110530.60  954.36
  -2  -3 -1110356.86 1989.83
   2  -3 -1111484.85 1055.07
  -2  -3 -1110732.32 1018.78
  -2  -3  11 8496.68 1874.20
   2  -3  11 9290.60  883.47
   2   3  1110929.02 1041.67
   2  -3  12  572.74  336.27
  -2  -3  12  530.34  206.49
  -2   3  12  452.50  236.75
  -2   3 -12   39.86  295.04
   2   3 -12  727.10  320.94
   2  -3 -12  617.12  286.72
  -2   3 -12  802.02  305.49
  -2  -3 -12  734.10  222.31
   2   3 -12  264.74  306.97
   2  -3 -12  223.30  275.99
  -2  -3 -12  478.08  338.76
   2  -3 -12  339.09  321.88
  -2  -3  12  539.21  288.88
   2  -3  12  621.66  382.85
   2   3  12  329.62  234.03
   2  -3  12  438.97  227.01
  -2  -3  12  247.71  200.23
  -2   3  12  136.86  214.67
   2  -3  12  603.47  240.22
  -2  -3  12  488.71  144.45
  -2   3  12  252.36  158.75
  -2   3 -12  290.65  190.71
  -2  -3 -12  250.15  198.53
   2  -3 -12  385.35  203.23
   2   3 -12  891.43  254.63
  -2  -3 -12  627.02  249.66
   2  -3 -12  315.41  195.74
  -2  -3 -12 1143.61  396.72
   2  -3  12 1086.33  349.25
   2  -3  1328120.18 2974.54
  -2  -3  1328552.60 3025.56
  -2   3  1328742.70 2965.35
   2  -3  1329963.82 3228.36
  -2  -3  1329659.42 3072.57
  -2   3  1329708.89 3173.60
  -2   3 -1326043.78 2695.89
  -2  -3 -1326226.40 2711.87
   2  -3 -1328157.03 2897.90
   2   3 -1326416.72 2746.34
  -2  -3 -1328634.45 2955.97
   2  -3 -1326048.54 2704.08
  -2  -3 -1329714.74 3062.35
   2  -3  1329915.36 3094.25
   2  -3  14 5962.01 1286.64
  -2  -3  14 5074.80 1330.40
  -2   3  14 6880.48  584.43
   2  -3  14 6763.01 1484.76
  -2  -3  14 7004.36 1512.76
  -2   3  14 8453.81 1486.28
  -2  -3 -14 7725.93 1579.83
  -2   3 -14 6569.64  524.86
   2   3 -14 6924.66  556.83
   2  -3 -14 6909.78  594.69
  -2  -3 -14 7152.40  602.30
   2  -3 -14 5450.51  484.26
  -2  -3 -14 6939.27 1465.69
   2  -3  14 5888.38  505.12
   2  -3  15 4411.11  736.32
  -2  -3  15 3918.39  770.37
  -2   3  15 6080.48  470.22
   2  -3  15 4573.82  648.68
  -2  -3  15 6128.34 1109.86
  -2   3  15 4605.25  851.59
  -2  -3 -15 4309.44  438.24
  -2   3 -15 4157.27  403.04
   2  -3 -15 5090.56  930.44
   2   3 -15 4584.47  472.81
  -2  -3 -15 5527.48  491.58
   2  -3 -15 4425.45  437.60
  -2  -3 -15 6019.37 1358.69
   2  -3  15 4263.76  549.10
   2  -3  16 1144.95  351.69
  -2  -3  16 1461.56  481.00
  -2   3  16 1604.96  331.25
  -2  -3  16 1683.67  411.69
  -2   3  16 1225.52  386.53
  -2   3 -16 1330.26  262.52
  -2  -3 -16 1247.59  223.50
  -2   3 -16  966.49  226.78
   2  -3 -16 1186.89  212.64
   2   3 -16 1238.83  283.74
  -2  -3 -16 1182.55  258.38
   2  -3 -16 1154.18  297.58
  -2  -3 -16 1462.44  304.73
   2  -3  16 1239.56  240.23
   2  -3  17  612.91  185.98
  -2   3  17  649.75  209.89
  -2  -3  17  579.54  190.95
  -2   3  17  712.91  178.71
  -2   3 -17  547.94  169.43
  -2  -3 -17  877.08  211.57
  -2   3 -17 1014.40  214.85
   2   3 -17  719.09  184.00
   2  -3 -17 1027.48  190.31
  -2  -3 -17  715.11  191.56
   2  -3 -17  465.71  182.51
   2  -3  17 1120.29  234.76
   2   3  17  690.19  218.53
  -2  -3  18  714.81  178.91
  -2   3  18  641.65  348.90
  -2   3  18 1046.37  185.41
  -2   3 -18  449.52  161.24
  -2  -3 -18  586.10  168.61
  -2   3 -18  556.75  202.68
   2   3 -18  948.51  235.52
   2  -3 -18  699.42  172.59
  -2  -3 -18  728.98  181.38
   2  -3 -18  670.33  217.41
   2  -3  18 1112.55  248.12
   2   3  18  473.26  277.21
  -2  -3  19  480.45  159.61
  -2   3  19   71.18  142.38
  -2  -3  19  193.41  138.44
  -2   3  19   45.43  102.87
  -2  -3 -19  374.89  155.68
  -2   3 -19  244.97  115.91
   2   3 -19   99.22   65.09
   2  -3 -19   99.42  121.29
  -2  -3 -19  267.24  130.02
   2  -3 -19  106.08  140.19
   2  -3  19  173.85   96.39
  -2  -3  20  200.51   98.21
  -2   4   055728.61 1162.35
   2   4   060582.03 1051.23
  -2  -4   057318.58 1155.10
  -2   4   054606.95 1118.03
  -2   4   055454.12 1124.86
   2   4   058642.23 1214.28
  -2  -4   061698.91 1152.90
  -2   4   060680.16 1163.44
  -2  -4   061722.10 1134.03
   2  -4   055246.50 1119.00
  -2  -4   055009.95 1230.79
   2  -4   056619.08 1165.97
  -2  -4   056369.91 1146.83
   2   4   1 5083.57  242.24
  -2   4   1 4000.03  307.80
  -2   4  -1 5059.46  360.02
   2   4  -1 5332.65  287.83
  -2   4   1 4676.55  379.19
  -2   4  -1 4759.07  334.32
   2   4  -1 4973.87  248.15
  -2  -4  -1 5057.09  343.61
  -2  -4   1 4710.01  310.92
  -2   4  -1 4656.42  334.57
  -2   4   1 5652.97  417.75
  -2   4   1 4943.83  309.62
  -2   4  -1 4152.94  309.96
   2   4   1 4689.99  321.63
   2   4  -1 4404.89  320.37
  -2  -4  -1 5183.06  459.71
  -2   4  -1 4775.68  465.24
   2  -4  -1 4889.14  306.64
   2   4  -1 5391.02  326.01
  -2  -4   1 4192.56  235.91
  -2  -4  -1 4516.25  281.00
   2  -4  -1 4844.78  303.62
   2  -4   1 5654.03  345.30
  -2  -4   1 5035.43  339.41
  -2  -4  -1 4317.31  299.76
   2  -4  -1 5410.88  360.20
   2  -4   1 5040.02  349.02
  -2  -4  -1 4732.97  324.80
   2  -4  -1 4961.31  271.19
  -2  -4   1 5210.63  345.09
   2  -4   1 5125.48  594.04
  -2  -4   246726.80 1530.26
   2   4   249614.60 1571.49
  -2   4   244207.37 1531.14
  -2   4  -244394.94 1540.33
  -2   4   247383.03 1636.13
  -2   4  -245398.25 1575.03
   2   4  -247708.84 1548.25
  -2  -4   246031.31 1756.60
  -2   4   242364.64 1490.11
  -2   4  -246015.06 1547.28
   2   4   246430.70 1623.97
  -2   4   245512.45 1531.02
  -2   4  -244541.00 1547.02
   2   4  -246587.28 1647.98
   2   4   249461.09 1654.88
  -2   4  -251015.36 1678.23
  -2  -4  -247165.69 1561.13
   2   4  -249495.03 1635.11
   2  -4  -247707.29 1599.14
  -2  -4  -245974.75 1549.55
   2  -4  -244380.74 1519.46
   2   4  -250307.03 1627.26
   2  -4   243654.13 1469.98
  -2  -4  -244320.75 1537.54
  -2  -4   246716.68 1556.49
   2  -4  -245071.33 1535.74
   2  -4   244844.25 1547.91
  -2  -4  -243826.74 1522.38
  -2  -4   248215.73 1640.57
   2  -4   246433.56 1536.09
  -2  -4   334889.21 1213.99
  -2   4   332982.00 1221.10
  -2   4  -331567.64 1178.47
  -2   4   333743.17 1274.17
  -2   4  -330913.88 1161.68
   2   4  -334399.69 1193.06
  -2  -4   331939.24 1187.41
  -2   4   333139.68 1227.46
  -2   4  -333301.45 1159.91
   2   4   336641.58 1336.50
  -2   4   334247.55 1191.81
  -2   4  -333044.98 1217.49
   2   4  -333907.50 1295.88
   2   4   336530.41 1258.18
  -2   4  -335399.19 1240.69
  -2  -4  -335868.78 1252.99
   2   4  -335905.40 1252.36
   2  -4  -332533.94 1160.86
  -2   4  -332728.16 1132.67
  -2  -4  -334149.06 1218.53
   2  -4  -333174.46 1209.32
   2   4  -336017.31 1196.69
  -2  -4  -332764.66 1222.60
  -2  -4   335395.97 1195.45
   2  -4  -333093.52 1193.75
   2  -4   333160.92 1220.79
  -2  -4  -333992.69 1245.40
  -2  -4   336221.42 1303.80
   2  -4   333786.06 1197.99
  -2  -4   430021.84 1117.52
  -2   4  -429353.23 1142.10
  -2   4   428779.74 1148.43
  -2   4  -430146.23 1156.58
   2   4  -429485.79 1067.87
  -2  -4   428931.89 1120.82
  -2   4   429648.35 1153.15
  -2   4  -430811.58 1082.61
   2   4   430938.39 1154.48
  -2   4   431043.33 1179.46
   2   4  -427993.76 1129.36
  -2  -4  -429215.30 1074.98
  -2   4  -430436.74 1520.05
   2   4  -429179.51 1087.34
   2  -4  -429927.08 1114.83
  -2   4  -428251.79 1024.30
  -2  -4  -429152.49 1115.31
   2  -4  -430101.31 1150.78
  -2  -4  -430224.59 1170.96
   2  -4  -429965.64 1109.84
   2  -4   431104.26 1193.54
  -2  -4  -430156.27 1173.39
  -2  -4   428534.18 1192.52
   2  -4   430495.01 1475.81
  -2  -4   512937.63  613.23
  -2   4   513739.38  668.12
  -2   4  -510945.47  546.56
  -2   4   512573.05  663.97
  -2   4  -511015.96  559.28
   2   4  -511954.12  546.98
  -2  -4   513765.56 1107.96
  -2   4   513031.15  674.46
   2   4   513005.12  588.87
  -2   4   512908.30  730.99
  -2   4  -511758.58  606.21
   2   4  -511720.82  671.10
  -2   4  -512662.30  571.75
  -2  -4  -512588.56  719.79
   2   4  -513836.95  643.37
   2  -4  -511673.73  571.14
  -2   4  -513269.53  559.70
  -2  -4  -511767.58  584.15
   2  -4  -513207.12  646.38
  -2  -4  -514146.30  710.81
   2  -4  -513344.11  588.06
   2  -4   510872.32  572.34
  -2  -4   513067.16  830.57
   2  -4   514544.54  678.49
   2   4   511865.43  601.76
  -2  -4   6102677.3 2987.12
  -2   4   6101322.3 2964.42
  -2   4  -6102218.4 2993.43
  -2   4   6103052.7 3016.47
  -2   4  -6102808.3 3033.54
   2   4  -6106066.5 3055.69
  -2  -4   6107480.1 3151.79
  -2   4   6101770.6 2990.13
  -2   4  -6104651.5 3085.06
   2   4  -697413.52 2919.88
  -2  -4  -6106746.0 3328.99
  -2   4  -6108347.5 3117.34
   2  -4  -6101224.7 2921.78
  -2   4  -6105524.1 3006.61
  -2  -4  -699099.17 2904.06
   2  -4  -6107814.0 3132.14
  -2  -4  -6105611.7 3095.03
   2  -4  -6111275.4 3152.35
   2  -4   6109893.6 3164.24
  -2  -4   6103264.5 3050.53
   2  -4   6110930.2 3204.99
  -2  -4   799921.54 3079.72
  -2   4   7106025.7 4061.31
  -2   4  -7100753.9 3137.74
  -2   4   7102538.4 3256.40
  -2   4  -7102950.4 3227.21
   2   4  -7102479.9 3154.10
  -2  -4   7104051.7 3568.23
  -2   4   7101104.4 3132.41
  -2   4  -7100892.3 3134.48
   2   4  -7100095.2 3187.89
  -2   4  -7109144.2 3929.89
  -2  -4  -799756.98 3071.22
   2  -4  -7101711.3 3125.65
   2   4  -7107346.5 3668.17
  -2  -4  -7109255.7 3770.94
   2  -4  -799029.88 3088.30
  -2  -4  -7102968.3 3221.73
   2  -4  -7108874.0 3676.39
   2  -4   7102095.5 3146.77
  -2  -4   7105847.2 3639.87
   2  -4   7103238.6 3188.62
  -2  -4   8 4465.84 1132.15
  -2   4   8 4673.70  402.06
  -2   4  -8 4734.56  427.06
  -2   4   8 4863.07 1244.29
  -2   4  -8 3776.25  388.11
   2   4  -8 4135.80 1261.12
  -2  -4   8 4976.73 1119.91
  -2   4   8 4611.88 1463.45
  -2   4  -8 4766.28  654.05
   2   4  -8 4449.68  509.07
  -2   4  -8 4850.55  868.61
  -2  -4  -8 3904.24 1313.93
   2  -4  -8 5094.24  423.90
   2   4  -8 6144.48  476.84
  -2  -4  -8 4692.25 1432.59
  -2  -4  -8 4744.89 1286.81
   2  -4   8 5184.25  436.26
  -2  -4   8 4141.21 1183.30
   2  -4   8 4884.94  453.42
   2   4   8 4833.02  397.34
  -2  -4   931893.34 1526.13
  -2   4   936967.25 1585.87
  -2   4  -933909.82 1505.30
  -2   4   933279.23 1461.59
  -2   4  -934053.98 1508.52
   2   4  -933570.44 1458.64
  -2  -4   937083.58 1544.14
  -2   4   934877.31 1526.21
  -2   4  -933987.23 1465.67
   2   4  -935488.19 1566.19
  -2  -4  -933555.89 1454.04
  -2   4  -932122.17 1400.09
   2   4  -929199.38 1597.78
   2  -4  -937325.98 1563.33
  -2  -4  -933782.01 1482.14
  -2  -4  -933446.65 1486.10
   2  -4   933604.39 1437.97
  -2  -4   935116.30 1692.66
   2  -4   933924.26 1536.38
   2   4   931810.64 1426.26
  -2  -4  1024081.15 1063.13
  -2   4  1024286.51 1282.80
  -2   4 -1024331.35 1099.88
  -2   4  1024353.40 1321.08
  -2   4 -1024772.92 1083.38
   2   4 -1023018.96  974.24
  -2   4  1025717.86 1350.92
  -2   4 -1025432.80 1118.25
   2   4 -1024961.73 1115.49
  -2  -4 -1022324.15  972.77
  -2   4 -1025082.33 1241.94
   2  -4 -1023702.55  996.44
   2   4 -1027383.89 1082.37
   2  -4 -1025747.47 1076.73
  -2  -4 -1025404.47 1181.68
  -2  -4  1024963.33 1068.36
   2  -4  1026056.70 1062.12
   2   4  1024317.89 1047.74
  -2  -4  11  154.98  201.27
  -2   4  11  -13.26  129.47
  -2   4 -11  197.25  247.14
  -2   4 -11  377.01  277.18
   2   4 -11   65.29  210.43
  -2   4  11   26.39  151.23
  -2   4 -11  112.08  275.58
   2   4 -11  364.06  231.00
  -2  -4 -11   14.11  155.76
  -2   4 -11  119.76  156.28
   2  -4 -11   39.19  231.32
   2   4 -11   73.30   93.52
  -2  -4 -11   27.91  290.05
   2  -4 -11  155.47  161.25
  -2  -4 -11 -124.73  282.26
  -2  -4  11  202.02  144.80
   2  -4  11   69.66  247.38
   2   4  11  -74.82  266.34
   2  -4  11  218.10  167.22
  -2  -4  11  272.23  166.95
  -2   4  11  272.39  188.28
   2  -4  11  122.64  203.20
  -2  -4  11  439.45  188.95
  -2   4  11  354.23  218.59
  -2  -4  11  272.93  154.01
  -2   4 -11  117.30  101.89
  -2  -4 -11   -7.98  219.99
   2  -4 -11  501.48  330.06
   2   4 -11  461.34  234.82
  -2  -4 -11  108.57   88.01
   2  -4 -11  266.11  173.14
  -2  -4 -11  143.86  129.58
   2  -4  11  278.52  272.42
  -2  -4  12 8633.46 3167.72
  -2   4  12 9581.44 1865.90
  -2   4 -1211241.99 1406.76
  -2   4 -12 9655.75 2874.10
   2   4 -1213356.01 1672.77
   2  -4 -1212516.50 1517.03
   2   4 -12 6084.09 3275.80
  -2  -4 -12 8559.27 2495.54
  -2   4 -1210406.69 2306.82
   2   4 -1212692.57 1575.83
   2  -4 -12 8083.99 2840.69
  -2  -4 -12 8617.39 1998.74
   2  -4 -1210768.64 3523.44
  -2  -4  12 7120.19 1901.45
   2  -4  1211922.42 1451.26
   2   4  1212033.15 1454.42
   2  -4  1210950.65 1881.78
  -2  -4  1211459.45 2308.28
  -2   4  1210381.17 1218.66
   2  -4  1210278.09 1773.02
  -2  -4  12 9650.31 1856.63
  -2   4  1213219.57 2746.00
  -2  -4  12 7859.25 1562.89
  -2  -4 -1211256.76 2081.88
  -2   4 -1212004.17 2239.30
   2  -4 -12 9508.79 1120.03
   2   4 -1211348.58 1572.41
  -2  -4 -1212298.88 1441.70
   2  -4 -1210205.68 1577.64
  -2  -4 -1211492.55 2452.69
  -2  -4  1211082.25 1323.65
   2  -4  12 9057.90 1079.36
   2  -4  13 9282.36  760.35
  -2  -4  1311320.44 2119.91
  -2   4  13 8723.11  597.24
   2  -4  1310828.29 2153.55
  -2  -4  13 9443.23 1958.23
  -2   4  13 9547.24 1551.49
  -2  -4 -1310530.52 1534.47
  -2   4 -1311797.17 1770.37
   2  -4 -13 9666.86  624.90
   2   4 -13 9620.58  638.64
  -2  -4 -1310628.57  669.60
   2  -4 -13 9537.32  627.51
  -2  -4 -1310008.81  701.45
  -2  -4  13 9231.90 1443.53
   2  -4  13 9773.84  663.48
   2  -4  14  425.85  135.00
  -2  -4  14  235.72  152.76
  -2   4  14  271.42  210.63
   2  -4  14  567.93  179.20
  -2  -4  14  483.70  209.90
  -2   4  14  470.37  168.88
  -2  -4 -14  251.32  206.82
  -2   4 -14  407.38  198.34
   2  -4 -14  180.73  192.15
   2   4 -14  272.63  213.06
  -2  -4 -14  467.52  214.27
   2  -4 -14  314.71  224.33
  -2  -4 -14  211.89  204.87
  -2  -4  14  380.80  201.88
   2  -4  14  476.97  240.63
   2  -4  15 7500.00 1127.10
  -2  -4  15 7906.45 1881.77
  -2   4  15 9095.32  580.93
  -2  -4  15 9451.97 1739.84
  -2   4  15 9696.38  692.66
  -2   4 -15 8484.49  603.69
  -2   4 -15 8588.25 1016.10
  -2  -4 -15 7398.18  495.69
   2   4 -15 8324.68 1413.57
   2  -4 -15 6840.80 1252.03
  -2  -4 -15 8708.66  586.61
   2  -4 -15 8300.71  566.82
  -2  -4 -15 9031.40 1678.77
  -2  -4  15 7273.74  883.32
   2  -4  15 9659.09  586.41
   2  -4  16  155.34  139.95
  -2  -4  16  328.34  248.69
  -2   4  16   40.54  164.85
  -2  -4  16  605.29  220.78
  -2   4  16  316.57  127.76
  -2   4 -16  692.65  266.86
  -2   4 -16  262.43  189.48
  -2  -4 -16  420.87  202.42
   2   4 -16  911.38  294.72
   2  -4 -16  336.22  262.78
  -2  -4 -16  357.58  219.24
   2  -4 -16  870.61  219.20
  -2  -4 -16  897.32  352.76
   2  -4  16  573.21  312.66
   2  -4  17 -102.69  139.20
  -2  -4  17 -117.36  161.56
  -2   4  17   74.27  183.59
  -2  -4  17  132.29  108.62
  -2   4  17  190.85   92.90
  -2   4 -17  367.15  159.02
  -2  -4 -17  205.19  187.98
  -2   4 -17  167.34  158.84
   2  -4 -17   80.99  149.71
   2   4 -17  399.29  163.24
  -2  -4 -17  273.24  187.36
   2  -4 -17  162.18  157.19
   2  -4  17  564.86  177.69
   2   4  17  159.21  126.23
  -2  -4  18 1638.37  501.80
  -2   4  18 1086.26  189.18
  -2  -4  18 1284.78  337.69
  -2   4  18 1124.99  231.11
  -2   4 -18  839.99  184.30
  -2  -4 -18 1418.51  270.10
  -2   4 -18 1149.89  241.24
   2  -4 -18 1066.65  195.72
   2   4 -18 1169.38  227.04
  -2  -4 -18 1495.33  249.03
   2  -4 -18 1342.71  243.43
   2   4  18 1259.89  240.28
  -2   4  19   88.18  134.12
  -2  -4  19  131.90  152.07
  -2   4  19  301.86  127.84
  -2   4 -19  329.23  166.24
  -2  -4 -19  172.95  124.96
  -2   4 -19  426.84  155.72
   2  -4 -19  175.66   83.77
   2   4 -19  194.89  113.88
  -2  -4 -19  139.06   98.84
   2  -4 -19  493.91  160.57
   2  -4  19  327.95  146.94
   2   4  19  136.89  112.27
  -2   5   0 8344.16  474.34
   2   5   0 9299.41  420.25
  -2   5   0 8524.64  616.95
  -2   5   0 8491.14  501.74
   2   5   0 8423.58  516.03
  -2   5   0 9699.24  516.56
   2   5   0 9132.63  507.59
   2  -5   0 8347.41  404.48
   2   5   0 8964.17  413.31
  -2  -5   0 9048.01  416.03
   2  -5   0 8526.45  435.95
  -2  -5   0 8760.94  472.72
   2  -5   0 9646.61  509.57
  -2  -5   0 9406.03  801.83
   2  -5   0 9385.80  474.30
  -2   5   129659.74 1142.79
   2   5   131850.32 1082.54
  -2   5  -131162.28 1198.90
   2   5  -132736.43 1147.31
  -2   5   129694.75 1137.99
  -2   5  -130226.94 1161.99
   2   5  -131436.32 1071.48
  -2  -5   129559.32 1120.52
  -2   5  -129721.33 1116.42
  -2   5   129962.52 1138.47
   2   5   131292.67 1229.02
  -2   5   130823.78 1185.21
  -2   5  -130428.29 1149.49
   2   5   130811.82 1144.23
   2   5  -130882.72 1195.07
  -2  -5  -132989.04 1153.13
  -2   5  -132744.57 1128.16
   2  -5  -130529.38 1077.77
   2   5  -130878.46 1082.35
  -2  -5   131726.12 1155.99
  -2  -5  -130610.97 1080.66
   2  -5  -129534.83 1105.83
   2  -5   130371.18 1101.70
  -2  -5   131694.30 1200.34
  -2  -5  -130283.21 1142.40
   2  -5  -128442.53 1099.06
  -2  -5  -128717.59 1089.08
   2  -5  -132033.39 1148.45
  -2  -5   128342.29 1406.50
   2  -5   130354.40 1267.20
  -2   5  -229961.39 1170.35
   2   5  -230912.77 1117.99
  -2   5   227916.66 1104.87
   2   5  -231425.36 1106.00
  -2  -5   228056.23 1081.88
  -2   5   228833.36 1113.01
  -2   5  -229344.19 1098.47
   2   5   230900.74 1212.01
  -2   5   230344.91 1316.67
  -2   5  -230301.08 1169.25
   2   5   232218.61 1170.63
   2   5  -229328.80 1155.39
  -2  -5  -230642.83 1075.40
  -2   5  -232476.21 1134.89
   2   5  -233202.26 1156.98
   2  -5  -230353.19 1082.62
  -2  -5  -229933.60 1093.01
   2  -5  -230054.43 1136.58
   2  -5   230381.35 1100.77
  -2  -5   230403.97 1116.58
  -2  -5  -230684.74 1174.02
   2  -5  -228238.16 1071.31
   2  -5   229126.75 1126.62
  -2  -5  -229842.86 1139.99
  -2  -5   229971.95 1143.16
   2  -5   229046.25 1094.22
  -2   5   3 9809.45  534.59
  -2   5  -310121.64  568.86
  -2   5   310282.03  748.41
   2   5  -311794.21  541.91
  -2  -5   310047.58  562.45
  -2   5  -311390.71  559.33
   2   5   311154.29  597.68
  -2   5   311071.72  708.15
  -2   5  -310333.63  629.20
   2   5  -310161.64  585.44
  -2   5  -311345.36  604.77
  -2  -5  -310993.01  504.08
   2   5  -310783.80  507.41
   2  -5  -310937.17  514.36
  -2  -5  -3 9592.81  619.43
   2  -5  -3 9591.46  495.93
   2  -5   310774.34  508.56
  -2  -5   3 9673.17  460.75
  -2  -5  -310130.33  546.53
   2  -5  -3 9863.18  538.65
   2  -5   311106.06  565.41
  -2  -5  -3 8758.13  502.27
  -2  -5   3 9082.45  502.37
   2  -5   310867.88  531.15
  -2  -5   464175.15 2070.91
  -2   5   468246.85 2116.89
  -2   5  -467112.06 2088.20
  -2   5   465018.48 2045.97
  -2   5  -465995.69 2061.85
   2   5  -469416.43 2051.84
  -2  -5   469943.95 2139.25
  -2   5   467096.07 2081.35
  -2   5  -469565.35 2048.58
   2   5   469028.72 2113.36
  -2   5   471205.55 2060.95
   2   5  -467572.00 2143.07
  -2   5  -474078.61 2170.05
  -2  -5  -464714.31 1919.98
   2  -5  -467024.13 1980.63
   2   5  -471633.39 2099.65
  -2  -5  -465368.05 1991.80
   2  -5  -467453.36 2054.41
   2  -5   465685.45 1932.88
   2  -5  -474643.69 2242.73
   2  -5   467733.97 2087.50
  -2  -5  -466780.49 2096.42
  -2  -5   465907.99 2178.20
   2  -5   466539.13 2007.21
  -2  -5   510007.32  519.46
  -2   5   510331.13  585.85
  -2   5  -510528.97  606.18
  -2   5   5 9694.41  549.56
  -2   5  -5 9320.57  568.09
   2   5  -510706.27  550.16
  -2  -5   510651.44  562.93
  -2   5   510563.21  614.60
   2   5   510840.63  573.43
  -2   5  -511202.50  621.50
   2   5  -5 8700.64  541.58
  -2  -5  -510876.84  543.74
  -2   5  -510306.73  896.68
   2   5  -511666.35  549.08
   2  -5  -5 9977.79  502.03
  -2  -5  -510807.95  560.48
   2  -5  -511804.09  624.35
  -2  -5  -511252.74  615.08
   2  -5  -510810.10  685.55
   2  -5   511030.83  584.41
  -2  -5  -510169.39  552.32
  -2  -5   5 8964.75  515.42
   2  -5   511549.54  596.45
  -2  -5   617499.84  792.26
  -2   5   618070.38  837.77
  -2   5  -617450.87  822.52
  -2   5   617642.82  852.77
  -2   5  -619728.32  904.33
   2   5  -619635.54  864.33
  -2  -5   618591.70  918.47
  -2   5   617397.94  829.25
   2   5   621177.75  895.04
  -2   5  -620760.59  940.86
   2   5  -619791.82  923.21
  -2   5  -620465.64  854.43
  -2  -5  -616747.17  736.04
   2  -5  -619964.76  834.51
   2   5  -619118.82  810.66
  -2  -5  -618616.13  824.93
   2  -5  -620259.98  941.76
  -2  -5  -619972.23  974.56
   2  -5  -621558.89 1562.01
   2  -5   618527.76  840.81
  -2  -5   618337.84  843.96
   2  -5   618893.80  846.00
   2   5   620360.10  909.55
  -2  -5   713050.28  683.89
  -2   5   713845.44  727.24
  -2   5  -713703.48  746.51
  -2   5   714559.11 1802.62
  -2   5  -713883.29  982.47
   2   5  -713436.46  718.12
  -2  -5   714943.51  735.78
  -2   5   714171.68  742.45
  -2   5  -712910.85  718.05
   2   5  -713059.51  780.91
  -2  -5  -715058.18  728.50
  -2   5  -714124.77  699.19
   2   5  -715578.05  748.68
   2  -5  -714876.78  721.22
  -2  -5  -713179.31  769.93
   2  -5  -712567.50  729.07
  -2  -5  -713835.83  740.19
   2  -5  -713062.38  663.16
   2  -5   713760.86  721.30
  -2  -5   714307.85 1086.12
   2  -5   713809.13  729.75
   2   5   715303.60  785.16
  -2  -5   826295.61 1221.79
  -2   5   827461.32 1267.13
  -2   5  -825110.17 1191.82
  -2   5   825734.21 1201.40
  -2   5  -825638.00 1222.55
   2   5  -825838.41 1199.63
  -2  -5   826922.29 1211.52
  -2   5   825692.49 1213.83
  -2   5  -826529.01 1237.84
   2   5  -825670.42 1245.46
  -2   5  -826065.56 1206.57
  -2  -5  -826696.81 1199.92
   2  -5  -827772.15 1235.18
   2   5  -824747.35 1358.69
  -2  -5  -824141.67 1395.02
   2  -5  -827929.50 1271.31
  -2  -5  -826133.14 1231.17
   2  -5   827705.50 1253.94
  -2  -5   826786.47 1270.46
   2  -5   827602.07 1263.29
   2   5   827697.95 1265.58
  -2  -5   9  404.76  126.84
  -2   5  -9  257.64  204.42
  -2   5   9  221.99  180.40
  -2   5  -9  256.92  192.73
   2   5  -9  262.56  207.30
  -2   5   9  458.02  219.13
  -2   5  -9  872.63  274.87
   2   5  -9  329.36  314.83
  -2  -5  -9  343.92  199.38
  -2   5  -9  154.08  133.28
  -2  -5  -9  318.43  172.69
   2  -5  -9 1614.85  317.80
  -2  -5  -9   66.39  141.00
   2  -5   9   71.90  177.84
  -2  -5   9  519.76  139.65
   2  -5   9  316.57  270.84
   2   5   9  634.79  320.17
  -2  -5  10 5808.17 2017.27
  -2   5  10 6755.38 1506.74
  -2   5 -10 7938.42  834.25
  -2   5  10 5861.17 1798.35
  -2   5 -10 8049.28  875.65
   2   5 -10 8091.00  853.92
  -2   5  10 6998.34 1768.53
  -2   5 -10 7717.09  849.69
   2   5 -10 6837.70  752.56
  -2  -5 -10 5813.34 1172.52
  -2   5 -10 6628.97 1145.80
   2  -5 -10 7751.74  769.81
   2   5 -10 5066.05 2041.11
  -2  -5 -10 5815.01 1590.62
  -2  -5 -10 7870.62  910.67
  -2  -5  10 6609.98 1372.93
   2  -5  10 8026.34  822.68
   2   5  10 5946.83  644.80
  -2   5  10 5496.00  594.86
   2  -5 -10 6053.68  628.58
  -2  -5  11 7853.32 2450.34
  -2   5  11 8319.74 1996.92
  -2   5 -11 7071.16  891.67
  -2   5  11 8825.60 1089.93
  -2   5 -11 5471.28 2703.54
   2   5 -11 8199.58  996.00
  -2   5  11 6170.90 1359.51
  -2   5 -11 8142.95  983.51
   2   5 -11 8261.61 1046.50
  -2  -5 -11 5570.71 1320.02
  -2   5 -11 6227.61 1019.66
   2  -5 -11 5686.22 1709.00
   2   5 -11 7430.61  920.73
  -2  -5 -11 6573.04 2410.03
   2  -5 -11 7569.64  948.39
  -2  -5 -11 5566.82 2651.88
  -2  -5  11 6888.79 1825.50
   2  -5  11 8892.26 1060.08
   2   5  11 7705.57  963.21
   2  -5  11 9396.81 1921.95
  -2  -5  11 9529.13 1616.81
  -2   5  11 7822.27  872.28
   2  -5  11 7143.43 1351.09
  -2  -5  11 7315.15 1659.13
  -2   5  11 7850.59 1200.10
  -2   5  11 7329.26  858.61
  -2  -5  11 6798.09 1288.82
  -2   5 -11 6966.94  833.48
  -2   5 -11 6000.02  996.78
   2   5 -11 7700.60  903.54
  -2  -5 -11 8230.34 2254.08
   2  -5 -11 8198.48 1584.20
  -2  -5 -11 6774.21 1261.93
  -2  -5 -11 7898.10 1196.58
  -2  -5  11 5892.09  731.61
   2  -5  11 7467.55  849.22
   2   5 -1221329.63 2415.58
   2  -5  1217615.35 3445.11
  -2  -5  1216967.89 2723.49
  -2   5  1217492.41 1862.65
   2  -5  1216288.27 3154.72
  -2  -5  1217626.82 2990.14
  -2   5  1218362.82 3302.45
  -2  -5  1217129.59 1941.76
  -2   5 -1217193.68 1866.17
  -2   5 -1217817.71 1911.51
  -2  -5 -1216578.11 1885.40
   2   5 -1217717.99 1894.31
  -2  -5 -1216299.47 1780.14
   2  -5 -1216503.39 1768.09
  -2  -5 -1215205.19 1920.87
  -2  -5 -1215843.06 1918.06
  -2  -5  1217444.41 1881.98
   2  -5  1216309.75 1818.76
   2  -5  13 7762.99 1335.52
  -2  -5  13 7867.62 1637.67
  -2   5  13 6222.31  515.76
  -2  -5  13 6964.06 1241.91
  -2   5  13 7088.77 1120.52
  -2   5 -13 6847.03  539.15
  -2  -5  13 7246.23  717.61
  -2   5 -13 4388.47 1101.37
  -2  -5 -13 5100.20 1216.33
   2  -5 -13 6338.46  540.11
   2   5 -13 6956.02  539.29
  -2  -5 -13 7375.96  599.97
   2  -5 -13 5359.15  505.43
  -2  -5 -13 6715.18 1334.36
  -2  -5  13 7073.39  575.09
   2  -5  13 6526.16  548.51
   2  -5  14 5181.03 1196.63
  -2  -5  14 5793.98 1294.09
  -2   5  14 5851.33  480.12
  -2  -5  14 6116.01 1162.91
  -2   5  14 6721.39 1180.92
  -2   5 -14 5782.74  469.77
  -2   5 -14 6989.21  504.04
  -2  -5 -14 5461.78  437.10
   2  -5 -14 5445.60  789.95
   2   5 -14 5007.38  836.60
  -2  -5 -14 5460.25  450.71
   2  -5 -14 6083.24  484.68
  -2  -5 -14 5973.79  635.29
  -2  -5  14 5869.20 1300.48
   2  -5  14 6693.46  495.99
   2  -5  15 2310.12  509.45
  -2  -5  15 2347.44  525.36
  -2   5  15 2293.48  380.86
  -2  -5  15 2418.73  530.46
  -2   5  15 2349.16  422.30
  -2   5 -15 1979.98  280.45
  -2  -5 -15 2173.81  320.55
  -2   5 -15 2399.99  321.45
   2   5 -15 1985.55  284.43
   2  -5 -15 2083.27  285.86
  -2  -5 -15 2091.06  311.17
   2  -5 -15 2714.25  388.03
  -2  -5 -15 2120.93  610.68
  -2  -5  15 1384.20  313.93
   2  -5  15 2090.86  359.22
   2  -5  16  230.79  128.83
  -2  -5  16  206.08   94.78
  -2   5  16  440.65  184.61
  -2  -5  16  666.11  207.64
  -2   5  16  517.45  171.11
  -2   5 -16  204.19  149.46
  -2   5 -16  302.68  158.49
  -2  -5 -16  777.60  187.01
   2   5 -16  432.42  163.39
   2  -5 -16  332.89  110.14
  -2  -5 -16  364.20  201.44
   2  -5 -16  365.94  268.51
  -2  -5 -16  541.42  214.22
  -2  -5  16  244.89  148.45
   2  -5  16  617.35  269.45
   2  -5  17  403.41  164.00
  -2  -5  17 1672.07  368.61
  -2   5  17 1290.89  230.81
  -2  -5  17 1771.19  356.03
  -2   5  17  985.67  188.25
  -2   5 -17 1046.36  224.00
  -2   5 -17  876.45  174.88
  -2  -5 -17  841.21  183.24
   2   5 -17 1431.65  218.27
   2  -5 -17  700.87  200.72
  -2  -5 -17 1731.22  268.28
   2  -5 -17 1121.11  226.93
   2  -5  17 1176.10  248.91
   2   5  17  647.47  213.28
   2  -5  18  236.79  114.22
  -2  -5  18  667.77  227.08
  -2   5  18  509.68  157.06
  -2  -5  18  506.10  179.17
  -2   5  18  654.74  411.72
  -2   5 -18  344.30  128.73
  -2   5 -18  128.09  139.96
   2   5 -18  436.53  171.05
   2  -5 -18  107.74  124.18
  -2  -5 -18  806.85  198.41
   2  -5 -18  675.99  169.76
   2  -5  18 1117.70  268.34
   2   5  18  407.35  164.65
  -2  -5  19 1394.45  536.67
  -2   5  19  905.69  307.57
   2   5 -19 1082.72  282.37
  -2  -5 -19 1623.88  343.20
   2  -5 -19 1775.49  357.83
   2   6   0   10.92  106.33
  -2   6   0  -69.47  249.92
  -2   6   0  568.34  299.61
   2   6   0 -215.22  309.68
  -2   6   0  -50.50  182.17
   2   6   0  163.73  207.10
   2  -6   0  -43.83  156.59
  -2  -6   0  153.10  120.86
   2  -6   0  161.81  243.23
   2  -6   0  -41.53  115.04
  -2   6  -183578.02 2515.25
   2   6  -188123.74 2523.44
  -2   6   183903.35 2509.14
  -2   6  -183923.26 2648.17
  -2   6   179760.54 2399.47
  -2   6  -184341.79 2512.13
   2   6   181997.94 2515.66
   2   6  -180764.28 2507.51
  -2   6   190203.70 2615.49
  -2   6  -183154.45 2461.44
   2   6  -187829.42 2623.61
   2   6   186730.89 2532.98
  -2  -6  -192479.77 2607.21
   2  -6  -186667.89 2518.81
   2  -6   185800.09 2458.66
  -2  -6  -182755.21 2465.72
  -2  -6   188200.53 2595.65
   2  -6  -181324.04 2426.22
   2  -6   181219.43 2430.07
  -2  -6  -184431.61 2548.11
  -2  -6   181794.31 2446.35
   2  -6   187741.58 2496.38
  -2   6   2  815.71  216.07
  -2   6  -2 1222.17  243.81
   2   6  -2 1316.08  175.38
  -2   6   2 1223.65  581.26
  -2   6  -2  819.04  221.04
  -2   6   2 1280.75  460.47
  -2   6  -2  952.63  272.41
   2   6   2 1277.33  238.88
  -2   6   2  922.72  366.42
  -2   6  -2  765.47  252.69
   2   6  -2 1053.82  224.34
   2   6   2 1070.58  188.05
  -2  -6  -2  967.51  325.86
   2  -6  -2 1059.78  225.27
   2  -6   2  825.06  132.35
  -2  -6  -2 1045.67  389.83
  -2  -6   2  866.90  353.56
   2  -6  -2 1235.47  292.32
   2  -6   2  753.50  306.22
  -2  -6  -2  983.61  307.26
  -2  -6   2  913.91  245.33
   2  -6   2  786.25  230.35
  -2   6   375993.20 2327.52
  -2   6  -376045.49 2349.88
   2   6  -380320.98 2377.29
  -2   6   376896.53 2463.51
   2   6  -380890.92 2370.73
  -2  -6   375321.32 2304.61
  -2   6   374745.20 2307.81
  -2   6  -376547.27 2301.15
   2   6   377660.63 2396.43
  -2   6   377105.09 2296.76
  -2   6  -375309.24 2304.94
   2   6  -377281.31 2413.08
  -2  -6  -374503.13 2219.76
   2  -6  -375723.49 2277.88
  -2  -6  -379614.34 2443.61
  -2  -6   375369.63 2222.43
   2  -6  -375610.88 2299.57
   2  -6   376535.97 2332.64
  -2  -6  -376419.80 2326.73
  -2  -6   379693.66 2422.61
   2  -6   380835.37 2384.81
  -2   6   4 7479.53  478.18
  -2   6  -4 7889.73  502.97
   2   6  -4 7967.56  491.89
  -2   6   4 7500.24  494.11
  -2   6  -4 8620.77  523.94
   2   6  -4 8931.83 1466.28
  -2  -6   4 7518.29  565.54
  -2   6  -4 8497.16  478.98
   2   6   4 8210.06  529.91
  -2   6  -4 8055.05  507.52
   2   6  -4 7940.05  556.79
  -2  -6  -4 7829.45  516.34
   2  -6  -4 7704.86  469.46
   2  -6  -4 9414.94  539.91
   2  -6   4 6909.00  466.66
  -2  -6  -4 8535.86 1122.12
  -2  -6   4 7922.81  502.07
   2  -6   4 8236.99  519.18
  -2  -6   510025.07  544.33
  -2   6   511752.75  683.67
  -2   6  -511304.04  666.02
  -2   6   510323.56  591.54
   2   6  -511677.21  615.04
  -2  -6   511113.85  618.88
  -2   6   511741.02  659.56
   2   6   511214.55  646.26
  -2   6  -5 9631.92  590.19
   2   6  -511363.27  677.75
  -2  -6  -511150.22  631.60
   2  -6  -512546.79  655.92
  -2  -6  -513263.38 1059.83
   2  -6  -513358.32  879.02
   2  -6   511338.90  635.31
  -2  -6  -511390.35  629.47
  -2  -6   512077.91  752.51
   2  -6   511898.48 1316.14
  -2  -6   628422.72 1141.00
  -2   6   628062.46 1165.59
  -2   6  -625560.49 1112.60
  -2   6   626740.84 2398.62
  -2   6  -625601.69 1121.23
   2   6  -627988.00 1138.32
  -2  -6   626180.98 1328.67
  -2   6   626377.54 1117.92
   2   6   627943.74 1168.42
  -2   6  -626297.70 1110.95
   2   6  -629388.62 1271.35
  -2  -6  -628019.82 1322.95
   2  -6  -626476.77 1096.45
  -2  -6  -627355.47 1220.33
   2  -6  -631091.41 1904.02
   2  -6   626266.03 1120.41
  -2  -6   625770.42 1642.86
   2  -6   627424.36 1135.92
   2   6   628296.24 1169.78
  -2  -6   713621.47 1507.08
  -2   6   712315.35  723.84
  -2   6  -713638.96  829.64
  -2   6   713785.98  829.96
  -2   6  -714464.74  858.22
   2   6  -712659.06  742.46
  -2  -6   714245.78  784.85
  -2   6   712347.57  728.29
  -2   6  -713637.35  840.45
  -2  -6  -712142.44  715.69
   2  -6  -714034.29  797.03
  -2  -6  -714602.51 1110.49
   2  -6  -713011.43 2217.88
   2  -6   713695.48  827.97
  -2  -6   714295.58  808.06
   2  -6   714180.69 2073.84
   2   6   715378.67  848.98
  -2  -6   8 3478.74 1420.99
  -2   6   8 4383.60 1181.21
  -2   6  -8 4300.25  477.23
  -2   6   8 3298.59  640.08
  -2   6  -8 5371.20  524.16
   2   6  -8 6283.11  584.64
  -2  -6   8 3971.38 1267.54
  -2   6   8 3434.01  410.50
  -2   6  -8 3717.19  444.06
   2   6  -8 4480.01  474.28
  -2  -6  -8 4568.89 1005.23
   2  -6  -8 4389.85  448.25
  -2  -6  -8 3724.30 1079.36
   2  -6   8 4861.54  432.13
  -2  -6   8 3968.82 1035.90
   2  -6   8 4284.30  426.06
   2   6   8 4443.89  473.75
  -2  -6   9  596.18  164.77
  -2   6   9  983.80  190.68
  -2   6  -9 1108.15  288.93
  -2   6  -9  641.91  305.54
   2   6  -9  591.89  346.47
  -2  -6   9  972.18  313.35
  -2   6   9 1184.65  301.49
  -2   6  -9 1428.64  351.89
   2   6  -9   71.64  310.18
  -2  -6  -9  956.98  236.73
   2  -6  -9  379.10  276.75
  -2  -6  -9  893.76  394.24
  -2  -6   9  937.07  376.83
   2  -6   9  705.08  220.40
   2   6   9  988.76  260.73
  -2  -6  10 5910.61 2272.53
  -2   6  10 9223.98 2323.13
  -2   6 -1010658.44 1237.59
  -2   6  10 6604.72 1686.33
  -2   6 -10 7001.06  895.58
   2   6 -10 8384.45  980.94
  -2   6  10 6654.52 1194.74
  -2   6 -10 9126.41 1133.95
   2   6 -10 8626.27 1029.84
  -2  -6 -10 7306.37 1678.87
   2  -6 -10 6064.21 1870.66
  -2  -6 -10 6464.55 1970.48
  -2  -6  10 7842.18 1779.00
   2  -6  10 7835.12  935.72
   2   6  10 8133.69  941.38
   2  -6  10 7353.81 1186.80
  -2  -6  10 6255.25 1254.34
  -2   6  10 7830.02  872.94
  -2  -6  10 5442.67 1152.42
  -2   6  10 6827.99 1316.80
  -2   6 -10 6241.23  903.98
  -2   6  10 5803.24  708.84
  -2  -6  10 5500.31 1096.36
  -2   6 -10 6180.60  745.37
  -2  -6 -10 8742.54 1684.23
   2  -6 -10 6703.41  748.64
  -2  -6 -10 6543.56 1210.62
  -2  -6 -10 7217.76 1592.47
  -2  -6  10 7193.24 1381.75
   2  -6  10 7473.64  840.59
  -2  -6  1113187.48 4228.31
  -2   6  1122468.03 2484.83
  -2   6 -1118055.82 2061.03
  -2   6  1122598.84 2500.63
  -2   6 -1120639.14 2318.76
   2   6 -1122403.81 2484.85
  -2   6  1111856.54 4507.42
  -2   6 -1121180.93 2368.99
   2   6 -1121078.42 2358.13
  -2  -6 -1117953.47 4062.63
   2  -6 -1121203.84 2338.14
  -2  -6 -1117555.17 2792.86
  -2  -6  1114757.46 3585.72
   2  -6  1118747.13 2084.59
   2   6  1117391.25 2399.14
   2  -6  1118178.70 3130.45
  -2  -6  1116276.01 2767.25
  -2   6  1113980.89 1522.88
  -2  -6  1117867.66 2793.78
  -2   6  1116833.87 1827.77
  -2   6 -1120027.63 3113.76
  -2   6  1117596.05 2058.22
  -2  -6  1117330.98 2554.42
  -2   6 -1118374.58 1965.32
  -2  -6 -1117563.69 1895.58
   2  -6 -1117593.07 1873.49
  -2  -6 -1117974.04 1965.73
  -2  -6 -1116714.85 2076.03
  -2  -6  1117471.89 1876.68
   2  -6  1116891.18 1851.72
   2  -6  12 2220.47  514.50
  -2  -6  12 2660.60  562.05
  -2   6  12 2138.43  307.50
  -2  -6  12 2382.01  532.05
  -2   6  12 1319.52  612.64
  -2   6 -12 2977.87  601.85
  -2  -6  12 2087.32  480.03
  -2   6 -12 1800.92  400.28
  -2  -6 -12 2374.43  420.07
   2  -6 -12 2521.01  346.02
  -2  -6 -12 1697.21  478.49
  -2  -6 -12 2093.11  549.72
  -2  -6  12 2186.17  449.67
   2  -6  12 2365.90  346.98
   2  -6  13 5786.48 1036.31
  -2  -6  13 3762.25  870.26
  -2   6  13 6345.26  566.54
  -2  -6  13 5903.77 1149.48
  -2   6  13 5860.09  968.48
  -2   6 -13 5742.00  545.73
  -2  -6  13 5376.42  794.92
  -2   6 -13 5512.43  472.34
  -2  -6 -13 6730.81  910.52
   2  -6 -13 5910.91  508.12
  -2  -6 -13 4450.94 1144.78
  -2  -6 -13 5689.14 1379.31
  -2  -6  13 6312.55 1252.99
   2  -6  13 5254.56  499.90
   2  -6  14 2160.66  553.32
  -2  -6  14 2750.77  541.14
  -2   6  14 2204.77  395.81
  -2  -6  14 2047.76  388.72
  -2   6  14 2553.39  421.08
  -2   6 -14 1686.87  279.52
  -2  -6  14 1381.62  469.22
  -2  -6 -14 1499.16  284.97
   2  -6 -14 1115.18  288.79
  -2  -6 -14 2002.52  619.87
  -2  -6  14 1204.91  270.69
   2  -6  14 1596.91  266.35
   2  -6  15 1641.90  431.56
  -2  -6  15 2042.23  453.58
  -2   6  15 1841.00  300.66
  -2  -6  15 1969.30  519.85
  -2   6  15 1365.92  293.18
  -2   6 -15 1826.16  272.45
   2   6 -15 1725.55  272.57
  -2  -6 -15 1759.11  278.29
   2  -6 -15 1935.83  290.37
  -2  -6 -15 2005.67  585.73
  -2  -6  15 2107.89  328.26
   2  -6  15 1443.82  279.58
   2  -6  16  418.26  177.04
  -2  -6  16 1225.86  266.57
  -2   6  16  581.54  180.20
  -2  -6  16  494.11  307.08
  -2   6  16  858.75  267.16
  -2   6 -16  689.69  169.87
  -2  -6 -16  590.38  218.97
   2  -6 -16  776.70  176.20
  -2  -6 -16  451.46  239.22
  -2  -6  16  513.50  208.74
   2  -6  16  632.81  228.17
   2  -6  17 1549.78  415.31
  -2  -6  17 1913.26  389.72
  -2   6  17 1934.31  285.66
  -2  -6  17 1430.77  498.17
  -2   6  17 1603.76  390.59
  -2   6 -17 1467.83  258.13
  -2  -6 -17 1631.63  589.55
   2  -6 -17 1949.73  299.40
  -2  -6  17 1870.00  437.67
   2  -6  17 2068.24  266.52
   2   6  17 1601.20  446.31
   2  -6  18 1450.95  536.96
  -2  -6  18 1864.74  558.22
  -2   6  18 2455.55  352.21
  -2   6 -18 1963.10  289.04
   2   6 -18 1825.10  633.80
  -2  -6 -18 2590.88  365.97
   2  -6 -18 1686.93  409.81
   2  -6  18 2042.50  406.97
   2   6  18 1243.19  423.23
  -2   7   0 3068.25  364.98
  -2   7   0 2612.35  746.60
  -2   7   0 2713.49  316.07
   2   7   0 2295.63  346.14
  -2   7   0 2510.19  834.42
   2   7   0 2860.18  353.50
  -2  -7   0 3157.46  926.35
   2  -7   0 2546.40  341.64
  -2  -7   0 1668.76  596.93
  -2   7   126559.35 1106.61
   2   7  -129745.66 1112.01
  -2   7   128479.98 1177.70
  -2   7  -126166.65 1152.54
  -2   7   129670.88 1194.18
  -2   7  -130300.90 1192.46
   2   7   128070.00 1183.40
   2   7  -129350.01 1245.31
  -2   7   132637.30 2190.08
  -2   7  -130177.85 1166.65
   2   7  -129572.08 1186.53
   2   7   131931.90 1209.71
   2  -7  -130107.61 1109.01
  -2  -7  -130172.07 1222.91
  -2  -7   129146.00 1177.80
   2  -7  -129592.08 1183.52
  -2  -7  -128333.25 1159.53
  -2  -7   129763.89 1172.53
   2  -7   129561.71 1092.80
  -2   7   219990.38  907.54
   2   7  -219129.21  819.20
  -2   7   219083.31  890.21
  -2   7  -218102.54 1412.12
  -2   7   218203.57  921.51
  -2   7  -218221.02  829.55
   2   7   217863.59  882.41
  -2   7   221969.52 1756.37
  -2   7  -221389.13  940.14
   2   7  -219289.68  915.64
   2  -7  -216986.24  741.18
  -2  -7  -218748.36  883.77
  -2  -7   218323.84  830.23
   2  -7  -218254.17  839.64
   2  -7   218227.81  853.56
  -2  -7  -218690.91 1099.53
   2  -7   219324.01  811.19
  -2   7   3  780.01  221.45
  -2   7  -3  628.98  281.38
   2   7  -3  565.59  175.09
  -2   7   3  501.65  225.65
  -2   7  -3  752.25  222.13
  -2   7   3 1087.44  343.64
  -2   7  -3  691.98  205.92
   2   7   3  804.52  244.65
   2   7  -3  519.57  254.20
  -2   7  -3 1160.31  301.05
   2   7  -3 1092.03  328.45
  -2  -7  -3  582.20  336.41
   2  -7  -3  677.17  224.18
  -2  -7  -3  741.69  286.59
  -2  -7   3  520.50  203.03
   2  -7  -3  566.75  220.35
   2  -7   3  775.99  269.64
  -2  -7  -3  898.77  216.15
  -2  -7   3  895.02  239.34
   2  -7   3  866.17  320.54
  -2   7   416410.50  834.61
  -2   7  -415092.91  809.40
   2   7  -415718.35  782.48
  -2   7   415866.09  780.73
  -2   7  -416453.12  833.60
  -2   7   414289.37  758.09
  -2   7  -417117.57  852.39
   2   7   415354.56  796.90
   2   7  -417106.20  979.93
  -2   7  -414880.45  786.82
   2   7  -415468.63  818.95
  -2  -7  -419197.22  851.64
   2  -7  -416763.58  788.72
  -2  -7  -417991.72  895.03
   2  -7  -417393.15  847.72
   2  -7   416506.57  818.66
  -2  -7  -414713.60  769.34
  -2  -7   415513.29  804.51
   2  -7   416776.60  998.77
  -2   7   5 8409.14  618.01
  -2   7  -5 7878.06  576.96
   2   7  -5 8969.74  621.83
  -2   7   5 8074.90  621.71
  -2   7  -5 8156.68  567.91
   2   7  -5 7660.84  526.04
  -2   7   5 9274.19  645.38
   2   7   5 8396.13  626.88
   2   7  -5 8637.00  686.98
  -2   7  -5 8335.66  605.14
   2   7  -5 8486.18  678.97
  -2  -7  -5 6362.76 1613.02
   2  -7  -5 8879.93  602.53
  -2  -7  -5 8819.96  602.33
   2  -7  -5 8346.32 2004.05
   2  -7   5 8655.76  615.25
  -2  -7  -5 7821.82  544.56
  -2  -7   5 7673.32 1202.13
   2  -7   5 6884.01 1485.47
  -2   7   6 6385.63  530.04
  -2   7  -6 6731.10  547.61
   2   7  -6 7352.76  577.12
  -2   7   6 6744.28 1746.01
  -2   7  -6 7024.40  551.69
   2   7  -6 8016.62  596.40
  -2   7   6 7543.80  604.42
   2   7   6 7981.40  606.16
   2   7  -6 7491.10  619.69
  -2   7  -6 7292.07  549.61
   2   7  -6 7170.88  633.06
  -2  -7  -6 6748.10 1902.46
   2  -7  -6 6685.36  514.97
  -2  -7  -6 7858.22  652.20
   2  -7  -6 7349.41 1700.53
   2  -7   6 7069.58  562.47
  -2  -7   6 8187.80 2025.46
   2  -7   6 7120.63 1491.49
   2   7   6 7971.58  642.06
  -2   7   7 6709.25  528.30
  -2   7  -7 6402.01  562.79
   2   7  -7 7711.11  611.03
  -2   7   7 6636.80 1521.90
  -2   7  -7 6408.59  574.72
   2   7  -7 7190.75  654.35
  -2   7   7 8060.14  642.82
   2   7  -7 6863.56  649.67
  -2   7  -7 6857.09 1940.79
   2   7  -7 6981.61  571.73
  -2  -7  -7 5551.86 1713.73
   2  -7  -7 8053.97  564.84
  -2  -7  -7 6248.96 1584.71
   2  -7  -7 6953.12  610.65
   2  -7   7 6023.45  487.47
  -2  -7   7 7254.69  573.40
   2  -7   7 6010.70 1666.65
   2   7   7 6634.51  536.27
  -2   7   8 2255.80  536.74
  -2   7  -8 2981.06  468.81
   2   7  -8 2740.80  472.93
  -2   7   8 2148.04  580.98
   2   7  -8 2109.94  371.27
  -2   7   8 2127.32  527.73
   2   7  -8 2594.53  465.21
  -2   7  -8 1983.69  402.98
  -2  -7  -8 2644.89  842.89
   2  -7  -8 2404.93  392.52
  -2  -7  -8 2167.16  747.72
   2  -7   8 2620.58  416.63
  -2  -7   8 1757.41  428.18
   2  -7   8 2304.83  707.91
   2   7   8 2660.86  393.81
  -2   7   931670.93 3427.93
  -2   7  -931928.97 3483.78
   2   7  -933257.76 3615.06
  -2   7   933386.72 3588.32
  -2   7  -934395.74 3723.29
   2   7  -932931.08 3568.91
  -2   7   932881.83 3565.14
   2   7  -931965.01 3546.17
  -2   7  -932918.60 3558.85
   2   7  -933753.00 3659.58
  -2  -7  -930280.94 3294.17
   2  -7  -936115.48 3874.82
  -2  -7  -930697.98 3329.16
  -2  -7   929895.19 3894.35
   2  -7   930554.52 3520.85
   2   7   933971.66 3638.91
   2  -7   929983.06 3496.86
  -2  -7   926620.36 2830.67
  -2   7   927150.92 2529.83
  -2  -7   928253.48 2662.24
  -2   7   925564.59 2386.54
  -2   7  -926994.43 2533.36
  -2   7   925733.59 2409.64
  -2  -7   927487.75 2947.96
  -2   7  -926486.44 2485.52
  -2  -7  -926860.43 2536.01
   2  -7  -927977.25 2614.18
  -2  -7  -926591.41 2491.70
  -2  -7  -925901.47 2408.43
  -2  -7   926752.10 2511.09
   2  -7   930047.70 3204.01
  -2   7  10 7821.37 1772.11
  -2   7 -10 9087.59 1186.05
   2   7 -1012791.43 1558.59
  -2   7  10 5418.33 2623.06
  -2   7 -10 8903.77 1154.82
   2   7 -10 8685.14 1165.61
  -2   7  10 8507.17 1817.97
  -2   7 -1011100.37 1349.06
   2   7 -10 6331.48 2360.27
  -2  -7 -10 5509.92 1845.42
   2  -7 -10 6976.64 2668.25
  -2  -7 -10 8248.86 2407.05
  -2  -7  10 8097.08 1802.35
   2  -7  10 6477.98 2428.76
   2   7  1012768.69 1534.37
   2  -7  10 9137.73 2111.25
  -2  -7  10 7421.96 1647.41
  -2   7  10 6563.73  814.01
  -2  -7  10 7371.03 1438.75
  -2   7  10 8354.84 1449.97
  -2   7 -10 8385.92  983.03
  -2   7  10 8453.24 1026.62
  -2  -7  10 9738.18 2098.42
  -2   7 -10 8089.77  952.82
  -2  -7 -10 7753.07  997.37
   2  -7 -10 8530.66  999.34
  -2  -7 -1010693.72 1984.78
  -2  -7 -10 8093.11 1403.74
  -2  -7  10 7714.67  923.65
   2  -7  10 9413.13 1114.52
   2  -7  11 2318.93  540.47
  -2  -7  11 1896.32  387.94
  -2   7  11 2184.58  333.77
  -2  -7  11 1607.22  365.02
  -2   7  11 1682.07  397.46
  -2   7 -11 1580.58  394.17
  -2   7  11 1382.09  275.94
  -2  -7  11 1988.92  367.39
  -2   7 -11 1810.19  329.22
  -2  -7 -11 1562.88  302.95
   2  -7 -11 1648.72  283.71
  -2  -7 -11 1732.66  376.51
  -2  -7 -11 2128.81  577.95
  -2  -7  11 1718.01  280.66
   2  -7  11 1445.83  336.45
   2  -7  12 4740.19 1312.00
  -2  -7  12 3895.27  719.57
  -2   7  12 3967.72  850.99
  -2   7 -12 3677.50  388.96
  -2   7  12 2722.14  315.34
  -2  -7  12 4341.74  838.43
  -2   7 -12 3473.08  586.84
  -2  -7 -12 3464.32  405.42
   2  -7 -12 3540.37  389.63
  -2  -7 -12 4146.51  724.91
  -2  -7 -12 5178.81  844.85
  -2  -7  12 4491.54 1026.99
   2  -7  12 4040.51  452.13
   2  -7  13 1776.10  435.59
  -2  -7  13  707.69  151.95
  -2   7  13  531.61  211.92
  -2  -7  13  910.61  409.60
  -2   7  13  924.79  221.01
  -2   7 -13  270.59  224.31
  -2  -7  13  614.67  197.29
  -2   7 -13  575.69  201.79
  -2  -7 -13 1600.29  334.30
   2  -7 -13  912.38  257.98
  -2  -7 -13  693.73  200.14
  -2  -7 -13  551.43  370.16
  -2  -7  13  350.04  331.73
   2  -7  13  887.73  259.24
   2  -7  14 4428.41 1043.13
  -2  -7  14 3882.25  683.96
  -2   7  14 3402.64  373.64
  -2  -7  14 4214.76  881.94
  -2   7  14 3352.71  607.44
  -2   7 -14 4015.53  396.32
  -2  -7  14 3839.20  819.10
  -2   7 -14 3485.84  630.59
  -2  -7 -14 3306.30  364.21
   2  -7 -14 3609.93  377.39
  -2  -7 -14 3477.06 1781.82
  -2  -7  14 3929.43  442.72
   2  -7  14 3013.10  348.70
   2  -7  15  235.27  130.26
  -2  -7  15  603.23  185.87
  -2   7  15  477.47  222.36
  -2  -7  15  134.83  168.26
  -2   7  15  193.92   82.59
  -2   7 -15  304.29  176.02
   2   7 -15   15.86  148.75
  -2  -7 -15  235.12  188.02
  -2  -7 -15  328.83  159.31
  -2  -7  15  395.59  169.65
   2  -7  15  595.65  174.02
   2  -7  16 4826.39  822.69
  -2  -7  16 4540.71  801.95
  -2   7  16 5399.57  391.57
  -2   7  16 4355.90  861.80
  -2   7 -16 4730.51  391.56
   2   7 -16 5219.40  380.02
  -2  -7 -16 4917.14  399.58
   2  -7 -16 6100.88  824.98
  -2  -7 -16 4121.11  650.23
  -2  -7  16 3513.79 1077.13
   2  -7  16 4822.75  376.70
   2  -7  17  852.58  228.59
  -2  -7  17  554.84  203.94
  -2   7  17  668.57  260.46
  -2   7  17  867.24  352.20
  -2   7 -17  830.39  193.04
   2   7 -17 1678.07  287.72
  -2  -7 -17 1016.36  209.22
   2  -7 -17 1298.79  187.39
  -2  -7  17  789.48  219.60
   2  -7  17 1023.87  337.44
   2   7  17  344.62  206.75
  -2  -7  18  253.21   92.16
  -2   7  18  279.84  135.68
  -2   7 -18  552.57  202.35
   2   7 -18  481.28  160.91
   2  -7 -18  258.38  126.40
   2  -7  18  260.35  216.03
  -2   8   012449.48  749.90
  -2   8   011600.12 1759.68
  -2   8   011656.45  713.36
   2   8   010390.51  719.03
  -2   8   012798.82  750.10
   2   8   011336.42  679.72
  -2  -8   011824.15  721.41
   2  -8   011605.40  680.45
  -2  -8   013660.12 1210.42
  -2   8   1 2194.65  297.88
  -2   8  -1 2118.99  351.50
  -2   8   1 1876.10  563.58
  -2   8  -1 2571.07  651.78
  -2   8   1 2277.41  365.44
  -2   8  -1 2325.45  308.49
   2   8   1 2855.03  361.54
   2   8  -1 2033.80  318.91
  -2   8   1 1862.75  391.91
  -2   8  -1 1540.45  254.55
   2   8  -1 2619.39  338.37
  -2  -8  -1 2481.32  900.59
  -2  -8   1 2367.54  565.27
   2  -8   1 2186.14  311.56
   2  -8  -1 2337.85  357.59
  -2  -8  -1 2342.62  766.73
  -2  -8   1 2001.91  694.13
  -2   8   2  214.85  220.16
  -2   8  -2  -21.03  183.89
  -2   8   2  124.83  160.32
  -2   8  -2  352.95  256.29
  -2   8   2  330.09  245.11
  -2   8  -2  145.47  214.59
   2   8   2  369.38  264.92
  -2   8  -2  205.87  175.44
   2   8  -2  513.19  232.75
  -2  -8  -2   72.08  152.30
  -2  -8   2  143.07   96.56
   2  -8  -2  545.33  219.71
   2  -8   2  324.74  236.81
  -2  -8  -2  127.71  158.71
  -2  -8   2  145.80  185.92
  -2   8   3 5618.00  504.60
   2   8  -3 6118.84  493.28
  -2   8   3 5211.10 1312.81
  -2   8  -3 5533.46 1678.27
  -2   8   3 6093.84  565.51
  -2   8  -3 4751.63  439.88
   2   8   3 6184.45  525.84
   2   8  -3 5167.36  559.01
  -2   8  -3 6079.22  517.26
   2   8  -3 5983.45  524.77
  -2  -8  -3 6081.60  794.19
   2  -8  -3 5748.42 1555.25
   2  -8   3 6320.67  566.83
  -2  -8  -3 4759.53 1493.41
   2  -8   3 4208.39  941.29
  -2   8   416419.92  915.31
  -2   8  -417641.78  971.78
   2   8  -417404.16  933.86
  -2   8   417536.40 1089.72
  -2   8  -414560.91  840.84
  -2   8   417094.27  958.09
   2   8   417089.53 1002.07
   2   8  -417472.41 1029.40
  -2   8  -416335.90  889.49
   2   8  -416911.50  955.86
   2  -8  -419620.17  991.57
  -2  -8  -416674.24  932.30
   2  -8  -416766.11  919.61
   2  -8   415869.58  890.70
  -2  -8  -414701.48  824.95
  -2  -8   415409.88  876.75
   2  -8   415795.69  855.87
  -2   8   5 1569.30  325.35
  -2   8  -5 1476.67  360.57
   2   8  -5 1154.06  284.67
  -2   8   5 1285.67  325.44
  -2   8  -5 2238.35  388.48
  -2   8   5 1305.41  283.45
   2   8   5  957.12  276.17
   2   8  -5 1140.62  357.68
  -2   8  -5 1007.10  241.52
   2   8  -5 2082.08  360.41
   2  -8  -5 1061.50  301.04
   2  -8  -5 1287.83  240.77
   2  -8   5 1516.42  322.54
  -2  -8  -5 1267.22  334.39
  -2  -8   5 1386.02  462.09
   2  -8   5 1372.89  527.90
  -2   8   610882.74  693.27
  -2   8  -610103.91  681.95
   2   8  -612145.38  773.87
  -2   8   612025.69  691.18
  -2   8  -6 9880.90  669.03
  -2   8   611711.28  753.37
   2   8   612300.66  808.50
   2   8  -611693.96  829.11
  -2   8  -610878.24  723.78
   2   8  -611716.81  727.17
   2  -8  -612611.34  755.61
  -2  -8  -610824.05  725.08
   2  -8  -612476.58 2719.48
   2  -8   610402.94  659.30
  -2  -8   6 9764.04 1235.17
   2  -8   6 9418.11 2387.33
   2   8   611176.05  690.74
  -2   8   712825.54 1155.17
  -2   8  -711297.32 1043.83
   2   8  -712406.88 1132.63
  -2   8   711028.88 1003.12
  -2   8  -711102.20 1071.95
  -2   8   712266.13 1130.60
   2   8  -711634.16 1157.07
  -2   8  -711007.73 1005.36
   2   8  -711897.26 1132.62
  -2  -8  -7 6632.84 2452.58
   2  -8  -711638.15 1067.65
  -2  -8  -712687.76 2855.69
   2  -8  -7 9262.60 2707.35
   2  -8   711399.86 1058.20
  -2  -8   711155.29 1755.00
   2  -8   7 8629.29 1970.99
   2   8   712737.08 1150.24
   2  -8   710826.07 2075.34
  -2   8   710171.32  889.52
  -2   8  -7 9825.04  878.24
  -2   8   7 9655.74  878.23
  -2  -8   7 9503.08 2185.35
  -2   8  -710678.33 2330.00
  -2  -8  -7 9433.46  864.56
  -2  -8  -710524.56  897.48
  -2  -8   710058.29  905.06
  -2   8   821153.14 2092.72
  -2   8  -823134.66 2281.37
   2   8  -825478.51 2514.70
  -2   8   824450.57 2367.04
  -2   8  -821690.44 2175.97
  -2   8   824227.62 2398.75
   2   8  -824327.68 2456.11
  -2   8  -826642.77 2586.78
   2   8  -824644.72 2439.21
  -2  -8  -822163.87 2211.22
   2  -8  -825479.56 2477.89
  -2  -8  -825804.81 2514.67
  -2  -8   825786.28 2502.96
   2  -8   823302.03 3054.34
   2   8   825426.93 2465.45
   2  -8   820387.82 2313.02
  -2  -8   820584.59 3103.18
  -2   8   819759.37 1886.10
  -2   8   819589.58 1868.54
  -2   8  -820375.69 1960.04
  -2  -8   818506.35 3339.07
  -2   8   819332.61 1856.06
  -2  -8   816501.80 1602.02
  -2   8  -820831.31 1996.97
  -2  -8  -819654.32 1923.18
   2  -8  -820042.34 1941.73
  -2  -8  -819260.38 1852.99
  -2  -8  -820207.60 3311.55
  -2  -8   820283.20 1980.87
   2  -8   823635.99 2510.49
  -2   8   910269.07 2358.66
  -2   8  -9 9629.44 1207.93
   2   8  -910077.77 1327.27
  -2   8   9 5261.64 2888.21
  -2   8  -9 9712.28 1255.01
  -2   8   910306.87 1282.13
  -2   8  -911530.64 1433.41
  -2  -8  -9 5245.92 2003.44
   2  -8  -9 7009.53 2476.65
  -2  -8  -9 7998.53 2525.40
  -2  -8   9 9063.94 2985.52
   2  -8   9 7667.23 3129.19
   2   8   911262.69 1370.88
   2  -8   910375.86 1297.29
  -2  -8   9 8418.39 1745.36
  -2   8   9 8370.61  986.55
  -2   8   9 8575.36 1664.88
  -2   8  -9 9089.80 1076.17
  -2   8   9 9436.41 1122.61
  -2  -8   9 9210.58 1442.63
  -2   8  -9 8774.20 1030.27
  -2  -8  -9 8822.35 1063.23
   2  -8  -910600.94 1211.42
  -2  -8  -9 8198.09  972.03
  -2  -8  -9 8499.05 2046.45
  -2  -8   9 8698.98 1048.48
   2  -8   9 8463.09  992.29
   2  -8  10 2488.89  458.56
  -2  -8  10 2673.53  600.07
  -2   8  10 2073.26  339.53
  -2  -8  10 1988.20  389.91
  -2   8  10 1882.28  509.77
  -2   8 -10 2195.44  330.92
  -2   8  10 2010.59  308.74
  -2  -8  10 2567.85  561.31
  -2   8 -10 2497.60  378.87
  -2  -8 -10 2961.96  418.93
   2  -8 -10 2324.17  315.97
  -2  -8 -10 3823.75  770.60
  -2  -8 -10 2134.37  437.13
  -2  -8  10 2355.43  330.43
   2  -8  10 2187.57  337.85
   2  -8  1110722.78 2100.49
  -2  -8  1111518.22 2204.18
  -2   8  11 9617.13  646.96
  -2  -8  11 7609.74 1731.75
  -2   8  11 9964.84 1292.31
  -2   8 -11 8812.59  625.08
  -2   8  11 9676.93  639.93
  -2  -8  1110716.95 1972.63
  -2   8 -11 9220.13 1398.73
  -2  -8 -11 9608.50  702.46
   2  -8 -1110806.88  725.72
  -2  -8 -1110576.07 2061.46
  -2  -8 -11 9751.74  688.54
  -2  -8  11 8476.73  637.45
   2  -8  11 9019.87  738.77
   2  -8  1215812.46 1480.35
  -2  -8  1214000.55  832.05
  -2   8  1214148.13  738.45
  -2  -8  1211604.58 2421.59
  -2   8  1212232.12 1282.56
  -2   8 -1212406.98  670.51
  -2   8  1213328.64  639.52
  -2  -8  1215102.32 1430.52
  -2   8 -1214586.90  733.68
  -2  -8 -1212929.61  678.46
   2  -8 -1214048.83  714.67
  -2  -8 -1212801.20 2497.58
  -2  -8 -1212779.74 1597.40
  -2  -8  1213929.75  697.84
   2  -8  1217564.14 2386.24
   2  -8  13  249.18  192.51
  -2  -8  13  266.84  194.85
  -2   8  13  517.70  197.42
  -2   8  13  515.82  183.62
  -2   8 -13  389.20  245.68
  -2  -8  13  624.24  225.90
  -2   8 -13  606.28  295.29
  -2  -8 -13  949.62  271.75
   2  -8 -13  258.19  180.32
  -2  -8 -13  249.43  168.48
  -2  -8 -13  189.03  172.24
  -2  -8  13  724.28  214.75
   2  -8  13  279.30  209.54
   2  -8  14 3697.41  758.98
  -2  -8  14 3202.50  491.77
  -2   8  14 2697.87  329.03
  -2   8  14 3697.73  670.48
  -2   8 -14 3406.85  331.37
   2   8 -14 4539.02  398.94
  -2   8 -14 2510.76  314.86
   2   8 -14 3148.23  316.55
  -2  -8 -14 3761.31  356.00
   2  -8 -14 2867.66  320.03
  -2  -8 -14 2694.78  530.05
  -2  -8 -14 3634.87  776.97
  -2  -8  14 3124.98  326.65
   2  -8  14 3354.53  740.37
   2  -8  15 3950.25  746.37
  -2  -8  15 3101.55  587.01
  -2   8  15 3027.31  308.43
  -2   8  15 3508.06  472.99
  -2   8 -15 3483.37  536.00
   2   8 -15 3461.97  338.80
  -2   8 -15 2923.01  383.15
   2   8 -15 2807.67  314.98
  -2  -8 -15 3077.49  332.59
   2  -8 -15 3251.88  317.61
  -2  -8 -15 3324.27  460.23
  -2  -8  15 3606.78  354.96
   2  -8  15 2908.10  447.73
   2  -8  16 5147.52  722.17
  -2  -8  16 4858.43  859.11
  -2   8  16 5097.54  397.75
  -2   8  16 4094.52 1066.87
  -2   8 -16 4760.49  447.33
   2   8 -16 5030.37  405.08
   2   8 -16 2148.66 1092.69
  -2  -8 -16 4803.21  456.87
   2  -8 -16 4876.81  414.51
  -2  -8  16 4138.19  398.92
   2  -8  16 4893.40  388.52
   2  -8  17  149.87   83.72
  -2  -8  17  129.57   99.60
  -2   8  17  323.16  172.12
  -2   8 -17  185.26  125.44
   2   8 -17  212.75  123.19
  -2  -8 -17  331.88  152.32
   2  -8 -17  182.40  128.70
  -2  -8  17  208.58  150.86
   2  -8  17   76.44  116.83
  -2   9   0 2795.75  380.61
  -2   9   0 3200.51  690.45
  -2   9   0 3184.08  395.17
   2   9   0 3480.58  462.33
  -2   9   0 3613.37  935.43
  -2  -9   0 3652.38 1184.89
  -2  -9   0 3540.14 1050.33
  -2   9   110727.40  674.64
  -2   9  -1 7934.09  575.16
  -2   9   1 8373.74  560.89
  -2   9  -1 9738.87 1933.92
  -2   9  -1 9687.15  672.93
  -2   9   110107.54  722.70
   2   9  -1 7650.92  595.13
   2   9   1 9246.58  644.72
  -2   9  -1 9457.13  714.18
   2   9  -1 7094.49 2084.32
  -2  -9   1 8795.79 2299.18
  -2  -9  -1 9617.42 1839.65
   2  -9  -112020.79 1038.57
   2  -9   1 9797.97  626.98
  -2  -9  -1 8050.41 1766.33
  -2  -9   1 9706.31  786.99
  -2   9  -2 1373.34  353.92
  -2   9   2 1255.91  274.36
  -2   9  -2 1039.55  343.97
  -2   9   2 1223.93  394.52
  -2   9  -2 1322.97  335.02
   2   9   2 1061.94  269.33
   2   9  -2  993.17  285.43
  -2   9  -2 1696.28  325.98
   2   9  -2  726.59  226.59
  -2  -9   2  842.35  359.83
  -2  -9  -2  814.66  207.95
   2  -9  -2 1499.32  550.56
   2  -9   2  951.36  342.33
  -2  -9  -2 1701.26  395.74
  -2  -9   2 1515.30  350.69
  -2   9   3 3253.42  432.80
  -2   9  -3 2728.24  420.56
  -2   9   3 4137.15  943.53
  -2   9  -3 3103.02  942.17
  -2   9   3 4213.35  463.37
  -2   9  -3 3899.93  466.30
   2   9   3 3613.55  450.75
   2   9  -3 3280.74  471.12
  -2   9  -3 3837.93  410.50
   2   9  -3 3577.95  469.50
  -2  -9  -3 4032.35 1165.18
   2  -9  -3 3968.44 1008.05
   2  -9   3 4742.80  471.05
  -2  -9  -3 3220.62  745.47
  -2  -9   3 4071.83 1520.67
  -2   9   4  645.79  286.78
  -2   9  -4  558.22  235.54
  -2   9   4  587.17  204.87
  -2   9  -4 1173.32  267.87
   2   9   4  639.41  323.71
   2   9  -4  352.84  320.12
  -2   9  -4  619.68  215.19
   2   9  -4  322.79  227.55
  -2  -9  -4  393.87  247.48
   2  -9  -4 1322.10  316.42
   2  -9   4  977.45  341.59
  -2  -9  -4  721.23  267.29
  -2   9   5 8517.69  888.85
  -2   9   5 5847.41 1410.12
  -2   9  -5 7242.31  815.45
  -2   9   5 6357.48  707.41
   2   9   5 7215.30  848.83
   2   9  -5 5987.02  781.40
  -2   9  -5 6969.06  769.44
   2   9  -5 6333.63  698.50
  -2  -9  -5 5194.55 1604.28
   2  -9  -5 6710.15 1317.34
   2  -9   5 6558.26  724.31
  -2  -9  -5 7448.99  808.27
  -2  -9   5 6496.45  776.49
   2  -9   5 3719.79 1355.84
   2  -9   5 6025.71 1415.41
  -2   9   5 5763.10  614.66
  -2   9  -5 4859.93  532.02
  -2  -9   5 4926.10  862.98
  -2   9   5 5003.99  597.30
  -2  -9   5 5253.35  895.58
  -2   9  -5 5516.35  580.45
  -2  -9  -5 5244.09  585.36
   2  -9  -5 6772.40  673.00
  -2  -9  -5 6477.17 1368.40
  -2  -9   5 4948.79  550.09
  -2   9   619447.64 1937.02
  -2   9  -620791.08 2082.35
  -2   9   616255.75 3935.04
  -2   9  -620296.17 2018.52
  -2   9   619811.82 1992.90
   2   9   624536.59 2423.55
   2   9  -618051.26 1883.57
  -2   9  -619401.16 1938.95
   2   9  -619155.13 1948.99
  -2  -9  -617882.55 1831.61
   2  -9  -618859.72 3725.89
   2  -9   619822.88 1975.42
  -2  -9   618678.71 1875.96
   2  -9   617675.21 2566.57
   2   9   620080.48 1978.09
   2  -9   617843.44 1802.39
  -2   9   615297.91 1502.37
  -2   9   615815.30 1565.31
  -2   9  -617350.21 1683.37
  -2  -9  -614179.88 2909.65
  -2  -9   615529.10 2164.86
  -2   9   616505.34 1609.09
  -2  -9   617683.82 1724.92
  -2   9  -616901.20 1639.96
  -2  -9  -616547.50 1628.12
   2  -9  -617238.79 1705.01
   2  -9   615348.04 1538.86
  -2  -9  -616281.02 1967.58
  -2  -9   617909.89 1732.63
  -2   9   7 2728.26  663.77
  -2   9  -7 2386.20  486.32
  -2   9   7 2712.86  778.01
  -2   9  -7 2960.87  582.03
  -2   9   7 1850.73  534.81
   2   9  -7 3274.96  670.57
  -2   9  -7 2009.90  486.92
   2   9  -7 2832.83  562.32
  -2  -9  -7 2720.43  793.34
   2  -9  -7 2121.64  758.46
  -2  -9   7 2496.78  726.25
   2  -9   7 1767.88  586.54
   2   9   7 2406.55  453.58
   2  -9   7 2193.79  541.31
  -2  -9   7 2266.28  486.44
  -2   9   7 2318.97  427.88
  -2   9   7 2959.68  446.00
  -2   9  -7 2670.63  437.55
  -2  -9   7 2465.12  489.27
  -2   9   7 2766.21  471.61
  -2  -9   7 3119.27  544.60
  -2   9  -7 2643.78  442.70
  -2  -9  -7 2716.48  504.81
   2  -9  -7 1871.78  364.52
  -2  -9  -7 2910.85  717.89
  -2  -9   7 2637.60  445.05
   2  -9   7 3039.80  473.40
   2  -9   831137.50 3329.82
   2  -9   831018.50 3190.10
  -2  -9   829759.16 3090.82
  -2   9   828435.74 2923.55
  -2   9   826466.35 2746.04
  -2   9  -828823.00 2978.31
  -2  -9   830198.12 3120.35
  -2   9   828477.76 2940.44
  -2  -9   826770.29 2786.86
  -2   9  -828120.86 2911.70
   2  -9  -830748.52 3189.64
  -2  -9  -825958.41 2694.17
   2  -9  -830352.90 3134.51
  -2  -9  -828090.60 2906.71
  -2  -9   827244.57 2820.66
   2  -9   828613.39 2962.59
   2  -9   9 1125.32  174.79
  -2  -9   9  862.16  238.81
  -2   9   9  554.64  255.15
  -2   9   9 1172.11  282.86
  -2   9  -9 1444.84  302.64
  -2   9   9 1590.38  346.06
  -2  -9   9  542.77  215.82
  -2   9  -9 1067.40  344.25
  -2  -9  -9  398.47  283.19
   2  -9  -9  822.95  233.28
  -2  -9  -9 1061.23  252.93
  -2  -9  -9 1464.76  223.52
  -2  -9   9 1122.66  285.31
   2  -9   9 1078.51  264.37
   2  -9  10  536.72  197.03
  -2  -9  10   91.03  165.12
  -2   9  10  364.12  176.55
  -2   9  10  156.00  105.49
  -2   9 -10  824.61  244.55
  -2   9  10  502.03  276.79
  -2  -9  10  273.71  126.64
  -2   9 -10  513.55  234.51
  -2  -9 -10  989.73  251.05
   2  -9 -10  735.33  254.93
  -2  -9 -10  322.31  213.23
  -2  -9 -10  446.27  155.46
  -2  -9  10  524.85  274.22
   2  -9  10  568.14  273.43
   2  -9  11  293.99  171.44
  -2  -9  11  132.68  140.93
  -2   9  11  166.32  205.27
  -2   9  11  257.88  188.96
  -2   9 -11  431.70  231.72
   2   9 -11  285.76  190.18
  -2   9  11  572.32  301.76
  -2  -9  11  705.47  401.22
  -2   9 -11  136.20  203.48
  -2  -9 -11  362.98  196.73
   2  -9 -11  253.95  197.24
  -2  -9 -11  -12.29  211.79
  -2  -9 -11  247.78  183.10
  -2  -9  11    7.72  190.78
   2  -9  11  418.89  243.81
   2  -9  12 3296.38  736.63
  -2  -9  12 3514.41  958.96
  -2   9  12 3611.89  405.00
  -2   9  12 2997.73  734.03
  -2   9 -12 3586.58  393.37
   2   9 -12 3824.21  381.05
  -2   9  12 3074.56  342.78
  -2  -9  12 4140.28  785.39
  -2   9 -12 3922.76  358.94
  -2  -9 -12 2612.02  325.16
   2  -9 -12 4492.90  449.87
  -2  -9 -12 3399.61  518.43
  -2  -9 -12 4060.97  751.77
  -2  -9  12 3893.65  420.87
   2  -9  12 3946.63  452.29
   2  -9  13  898.06  329.35
  -2  -9  13  662.41  228.67
  -2   9  13  546.95  227.69
  -2   9  13 1006.65  297.24
  -2   9 -13  466.64  200.99
   2   9 -13  378.11  159.23
  -2   9 -13  212.03  160.29
  -2  -9 -13  615.04  224.56
   2  -9 -13  774.44  188.64
  -2  -9 -13  710.97  182.95
  -2  -9 -13  276.79  117.83
  -2  -9  13  763.55  188.92
   2  -9  13  804.34  197.22
   2  -9  14 2640.51  559.94
  -2  -9  14 2983.90  568.91
  -2   9  14 2109.24  275.75
  -2   9  14 1921.94  418.15
  -2   9 -14 2050.27  318.97
   2   9 -14 1680.85  228.73
  -2   9 -14 1695.74  248.03
   2   9 -14 2327.94  265.98
  -2  -9 -14 2735.42  333.31
   2  -9 -14 1887.21  622.58
  -2  -9 -14 1564.29  376.67
  -2  -9 -14 1531.57  434.90
  -2  -9  14 2170.48  394.31
   2  -9  14 2640.03  331.93
   2  -9  15 1431.25  255.42
  -2  -9  15 2006.64  339.95
  -2   9  15 1125.64  330.28
  -2   9 -15 1741.10  268.90
   2   9 -15  907.15  181.53
  -2   9 -15 1490.26  258.23
   2   9 -15 1320.50  199.21
  -2  -9 -15 1979.33  298.52
   2  -9 -15 1531.15  241.48
  -2  -9 -15  876.18  397.27
  -2  -9  15 1429.45  247.31
   2  -9  15 2229.00  533.10
   2  -9  16 2114.33  576.69
  -2  -9  16 1865.45  425.25
  -2   9  16 2199.75  322.96
  -2   9 -16 2077.07  315.05
   2   9 -16 2093.53  329.62
   2   9 -16 1948.36  349.74
  -2  -9 -16 2266.77  339.63
   2  -9 -16 2736.49  415.44
  -2  -9  16 2000.86  293.09
   2  -9  16 2305.16  320.18
  -2   9 -17  754.34  183.36
  -2  -9 -17  763.00  214.22
   2  -9 -17  550.05  155.05
   2  -9  17  256.05  149.64
  -2  10   0 1604.87  365.46
  -2  10   0 1340.16  375.51
  -2  10   0 1361.65  411.84
   2  10   0 1736.65  381.61
  -2 -10   0 1371.50  364.08
   2 -10   0 1360.84  403.02
  -2 -10   0 1479.71  408.86
   2 -10   0 2004.46  442.32
  -2  10   0 1296.94  300.84
   2 -10   0 1182.73  249.66
  -2 -10   0 1660.67  306.16
   2 -10   0 1369.31  284.97
  -2 -10   0 1294.41  299.72
  -2  10   1 2166.53  459.54
  -2  10  -1 1831.23  427.27
  -2  10   1 1619.27  674.18
  -2  10  -1 1616.86  356.17
  -2  10  -1 2942.15  528.18
  -2  10   1 1586.91  343.92
   2  10   1 1761.18  384.40
   2  10  -1 2079.95  428.38
  -2  10  -1 2105.25  469.95
  -2 -10   1 1530.11  488.75
  -2 -10  -1 1505.84  563.73
   2 -10   1 1474.71  352.28
   2 -10  -1 2018.92  484.25
  -2 -10  -1 2108.96  732.86
  -2 -10   1 1292.78  288.19
   2 -10  -1 1614.03  410.88
   2 -10   1 1651.25  499.92
  -2  10   1 1517.89  275.18
  -2  10  -1 1109.85  279.47
   2 -10  -1 1861.74  440.25
  -2 -10  -1 1353.99  323.08
  -2 -10   1 1469.03  414.15
  -2 -10  -1 2009.82  394.62
   2 -10   1 1604.91  334.24
   2 -10  -1 2008.31  412.10
  -2 -10  -1 1292.07  331.86
  -2 -10   1 1352.96  303.94
  -2  10   2 5397.87  713.00
  -2  10  -2 4050.38  592.16
  -2  10   2 4633.07 1062.17
  -2  10  -2 3955.98 1274.20
  -2  10  -2 3409.85  557.15
  -2  10   2 5338.29  656.64
   2  10   2 4002.70  577.19
   2  10  -2 4550.67  615.40
  -2  10  -2 4468.95  925.41
  -2 -10  -2 3960.57 1196.69
   2 -10  -2 3038.08 1145.92
   2 -10   2 3387.14 1452.46
  -2 -10  -2 4005.16 1172.38
  -2 -10   2 4922.67  998.83
   2 -10  -2 3537.36 1116.31
   2 -10   2 4362.33 1546.60
  -2  10   2 3607.77  446.98
  -2  10  -2 4121.59  484.39
   2 -10  -2 3563.72  797.77
  -2 -10  -2 3334.86  777.68
  -2 -10   2 3619.73  778.70
  -2  10  -2 3598.90  460.43
  -2 -10  -2 3596.23  468.55
   2 -10  -2 3080.05  440.82
   2 -10   2 3419.05  474.56
  -2 -10  -2 3478.64  705.70
  -2 -10   2 3845.13  504.04
  -2  10   3 4224.02  693.25
  -2  10  -3 2960.27  538.93
  -2  10   3 2088.34  695.27
  -2  10  -3 3496.01  833.37
  -2  10   3 2813.78  570.56
   2  10   3 3467.78  579.17
   2  10  -3 2826.50  608.44
  -2  10  -3 3560.58  529.66
   2  10  -3 1575.59  379.09
  -2 -10  -3 2883.89  924.78
   2 -10  -3 3564.84  863.19
   2 -10   3 3027.61  528.40
  -2 -10  -3 2182.58  668.03
  -2 -10   3 3289.51 1035.42
   2 -10   3 2814.36 1103.40
  -2  10   3 2869.66  439.52
  -2  10   3 2576.73  405.66
  -2  10  -3 3018.84  457.18
  -2 -10  -3 2503.42  559.50
  -2 -10   3 2541.04  561.79
  -2  10   3 3405.28  491.52
  -2 -10   3 2593.15  661.54
  -2  10  -3 2821.55  457.44
  -2 -10  -3 2809.09  465.77
   2 -10  -3 3736.02  493.98
   2 -10   3 2971.86  435.75
  -2 -10  -3 3092.78  740.10
  -2 -10   3 3389.70  499.16
  -2  10   4  641.63  521.60
  -2  10  -4  840.76  458.26
  -2  10   4  277.02  249.44
  -2  10  -4  193.33  208.90
   2  10   4  817.67  390.54
   2  10  -4  973.23  563.63
  -2  10  -4  489.32  428.07
   2  10  -4  879.38  488.63
  -2 -10  -4  256.99  197.10
   2 -10  -4  266.40  328.24
   2 -10   4  196.70  318.97
  -2 -10  -4  232.07  392.73
  -2 -10   4  171.96  273.50
   2 -10   4  502.59  202.37
  -2  10   4  325.26  291.68
  -2  10   4  375.14  211.72
  -2  10  -4  320.25  226.39
  -2 -10  -4  429.01  113.96
  -2 -10   4  246.00  168.19
  -2  10   4  330.36  266.03
  -2 -10   4  136.02  184.89
  -2  10  -4  291.87  134.58
  -2 -10  -4  513.55  278.43
   2 -10   4  677.68  236.15
  -2 -10  -4  174.49  203.22
  -2 -10   4  226.35  231.60
  -2  10   5  158.73  311.05
  -2  10  -5  188.88  123.69
  -2  10   5   77.80  291.33
   2  10   5  621.86  480.67
   2  10  -5   56.94  391.12
  -2  10  -5  598.71  359.80
   2  10  -5 -155.31  281.64
  -2 -10  -5    8.44  154.05
   2 -10  -5  161.06  351.30
   2 -10   5 1017.64  519.04
  -2 -10  -5  133.89  238.70
  -2 -10   5 -272.99  249.18
   2 -10   5 -242.05  296.05
  -2  10   5  126.88  217.65
  -2  10   5  546.52  281.31
  -2  10  -5  322.42  233.83
  -2 -10  -5  -12.56  210.31
  -2 -10   5  -80.60  166.88
  -2  10   5  167.94  246.99
  -2 -10   5   68.53  139.41
  -2  10  -5  375.13  285.94
  -2 -10  -5  331.72  342.13
   2 -10  -5  212.00  242.98
   2 -10   5  100.08  227.12
  -2 -10  -5  157.91  166.63
  -2 -10   5  191.20  233.39
  -2  10   6 4889.33 1843.52
   2  10   610699.33 1433.21
   2  10  -6 9322.40 1262.83
   2 -10  -6 5044.08 1315.26
   2 -10   610090.56 1999.32
  -2  10   6 8046.13  978.96
  -2  10   6 6880.37 1432.57
  -2  10  -6 6437.13  782.18
  -2 -10  -6 7375.89 1427.27
  -2 -10   6 6622.83 1403.15
  -2  10   6 6497.26  809.19
  -2 -10   6 7952.48 2017.79
  -2  10  -6 7976.64  941.81
  -2 -10  -6 6966.89  873.95
   2 -10  -6 7214.34  902.92
   2 -10   6 5632.58  735.38
  -2 -10  -6 8090.57 1760.83
  -2 -10   6 7058.47  918.41
   2 -10   7 8346.95 1836.97
  -2  10   7 6084.03  490.99
  -2  10   7 6740.42  694.06
  -2  10  -7 6428.07  491.03
  -2 -10  -7 4601.26 1229.39
  -2 -10   7 5732.49 1065.07
  -2  10   7 6562.29  531.79
  -2 -10   7 6558.65 1194.43
  -2  10  -7 6996.74  544.86
  -2 -10  -7 5959.28  537.81
   2 -10  -7 7501.84 1152.81
  -2 -10  -7 7285.60 1896.87
  -2 -10   7 6179.44  517.23
   2 -10   7 6842.92  566.52
   2 -10   813769.81 2338.12
  -2 -10   812425.15 2845.11
  -2  10   812777.07  723.89
  -2  10   814070.57  898.52
  -2  10  -814817.84  813.11
  -2 -10   812095.17 1164.10
  -2  10   812104.83  692.92
  -2 -10   814279.31 2419.11
  -2  10  -812230.66  784.29
  -2 -10  -813186.54  766.07
   2 -10  -812708.34  734.61
  -2 -10  -813595.02 2339.40
  -2 -10   812337.55  752.87
   2 -10   814508.79  834.31
   2 -10   9 3637.91  868.55
  -2 -10   9 2018.01  444.04
  -2  10   9 2900.38  358.00
  -2  10   9 2343.47  656.24
  -2  10  -9 2510.70  314.01
  -2  10   9 3304.35  401.16
  -2 -10   9 2593.79  676.08
  -2  10  -9 3850.15  772.83
   2 -10  -9 2204.55  307.05
  -2 -10  -9 2619.14  413.14
   2 -10  -9 2430.30  304.36
  -2 -10  -9 3050.93  690.86
  -2 -10   9 2466.46  330.77
   2 -10   9 2533.98  316.78
   2 -10  10 1909.67  442.39
  -2 -10  10 1058.63  266.80
  -2  10  10 1920.73  311.47
  -2  10  10 1178.79  341.44
  -2  10 -10 1023.48  273.77
  -2  10  10 1095.21  252.47
  -2 -10  10 1572.90  485.56
  -2  10 -10  669.82  221.59
   2 -10 -10  580.48  199.63
  -2 -10 -10 1400.70  589.60
  -2 -10 -10 1253.65  258.83
  -2 -10  10 1706.08  336.10
   2 -10  10 1050.23  239.63
   2 -10  11 3433.43  742.73
  -2 -10  11 2746.94  651.46
  -2  10  11 2990.50  356.79
  -2  10  11 2086.80  316.36
  -2  10 -11 2366.23  355.81
  -2  10  11 1857.80  282.48
  -2 -10  11 3061.70  614.71
  -2  10 -11 2199.06  347.83
  -2 -10 -11 1675.14  509.87
   2 -10 -11 2866.01  335.99
  -2 -10 -11 2866.15  777.25
  -2 -10 -11 1996.10  380.82
  -2 -10  11 2254.40  326.30
   2 -10  11 2235.67  323.40
   2 -10  12 1639.22  439.81
  -2 -10  12 1309.68  544.29
  -2  10  12 1440.13  274.18
  -2  10  12  912.94  203.87
  -2  10 -12 1183.18  237.20
  -2  10  12 1032.96  215.31
  -2  10 -12 1558.48  293.97
  -2 -10 -12  873.07  218.05
   2 -10 -12 1794.19  410.68
  -2 -10 -12 1141.73  461.98
  -2 -10 -12 1267.72  231.56
  -2 -10  12 1531.62  258.14
   2 -10  12 1401.72  324.01
   2 -10  13  478.49  162.16
  -2 -10  13  624.88  220.63
  -2  10  13  696.74  257.09
  -2  10  13  163.48  102.79
  -2  10 -13  621.75  184.86
   2  10 -13  571.98  226.30
  -2  10  13  574.73  204.55
  -2  10 -13  428.71  161.78
   2  10 -13  486.25  187.11
  -2 -10 -13  785.38  198.10
   2 -10 -13  505.57  175.38
  -2 -10 -13  956.43  199.18
  -2 -10 -13  389.45  148.49
   2 -10  13 1066.66  236.97
   2 -10  14  894.57  189.76
  -2 -10  14  901.48  309.03
  -2  10  14  168.29  148.49
  -2  10 -14  805.69  176.47
   2  10 -14  827.72  200.98
  -2  10 -14  456.33  153.62
   2  10 -14  542.97  166.02
  -2 -10 -14  849.55  226.62
   2 -10 -14  540.26  192.41
  -2 -10 -14  525.20  147.74
  -2 -10 -14  230.98  226.79
  -2 -10  14  608.71  190.09
   2 -10  14  634.00  203.73
   2 -10  15  590.37  160.58
  -2 -10  15  252.65  112.55
  -2  10  15   89.73  139.00
  -2  10 -15  591.61  197.33
  -2  10 -15  360.71  159.34
   2  10 -15  522.68  172.54
  -2 -10 -15  243.94  182.64
   2 -10 -15  285.45  122.11
  -2 -10  15 1062.69  217.11
   2 -10  15  259.75  117.37
   2 -10  16   35.08  134.19
   2 -10 -16   45.31  105.75
   2 -10  16  119.42   92.59
  -2  11   0  172.47  356.72
  -2  11   0  446.68  295.09
  -2  11   0  487.06  371.83
   2  11   0  944.32  381.22
  -2 -11   0  -33.79  346.52
   2 -11   0  540.35  418.20
  -2 -11   0  368.13  255.01
   2 -11   0  181.16  119.54
  -2  11   0  236.99  194.94
   2 -11   0  253.58  103.15
  -2 -11   0  408.38  133.31
  -2 -11   0  611.30  259.72
   2 -11   0  396.29  250.07
  -2 -11   0  554.95  264.02
  -2  11   1 2456.47  573.89
  -2  11  -1 1730.69  449.59
  -2  11   1 1619.66  693.68
  -2  11  -1 1194.99  593.18
  -2  11  -1 3405.97  689.43
  -2  11   1 2367.19  586.89
   2  11  -1 2722.98  660.58
   2  11   1 2135.39  578.43
  -2 -11  -1 1947.18  676.15
   2 -11  -1 2512.53  739.40
   2 -11   1 1778.39  641.68
  -2 -11  -1 1568.85  540.55
  -2 -11   1 1423.76  593.89
   2 -11  -1 2212.85  495.45
   2 -11   1 2197.25  503.90
  -2  11   1 2280.63  368.18
  -2  11  -1 1751.17  369.78
   2 -11   1 1868.04  417.93
   2 -11  -1 2134.92  500.33
  -2 -11   1 2614.44  622.23
  -2 -11  -1 2295.27  613.55
  -2 -11  -1 2557.69  461.18
   2 -11  -1 2962.68  552.86
   2 -11   1 2387.64  429.47
  -2 -11  -1 2742.79  888.93
  -2 -11   1 1838.90  361.64
  -2  11   2  318.83  349.52
  -2  11   2  171.14  265.14
  -2  11  -2  195.50  288.05
  -2  11   2  533.87  443.38
   2  11   2  286.76  290.80
   2  11  -2  222.81  390.87
  -2 -11  -2  195.59  298.69
   2 -11   2  -52.47  358.50
  -2 -11  -2 -198.59  260.80
  -2 -11   2  605.91  273.78
   2 -11   2  -21.13  220.80
  -2  11   2   66.77  201.65
  -2  11   2  308.51  211.71
  -2  11  -2   68.51  241.22
  -2 -11  -2  571.35  253.50
  -2 -11   2  244.83  133.01
  -2  11   2   97.69  220.94
  -2  11  -2  378.52  282.07
  -2 -11  -2  168.56  220.65
   2 -11  -2  411.28  257.61
   2 -11   2   89.59  219.02
  -2 -11  -2  575.63  273.48
  -2 -11   2  275.83  190.60
  -2  11  -3  224.37  549.70
   2 -11   3  340.49  164.55
  -2  11   3  441.70  184.68
  -2  11   3  220.46  183.58
  -2  11  -3  561.17  325.50
  -2 -11  -3  290.07  159.12
  -2 -11   3  305.96  231.30
  -2  11   3  756.38  249.20
  -2 -11   3   98.97  103.74
  -2  11  -3  419.75  195.76
  -2 -11  -3  837.78  361.52
   2 -11  -3  487.12  211.66
   2 -11   3  268.38  218.55
  -2 -11  -3  483.92  165.16
  -2 -11   3  588.09  270.83
   2 -11   4  916.78  419.04
  -2  11   4 1112.38  281.48
  -2  11   4 1160.62  263.65
  -2  11  -4  738.89  268.34
  -2 -11  -4  869.81  272.09
  -2 -11   4 1100.39  222.67
  -2  11   4  381.47  281.67
  -2 -11   4  486.68  222.37
  -2  11  -4  183.01  226.61
  -2 -11  -4  908.03  306.00
   2 -11  -4  710.01  232.73
   2 -11   4  422.34  242.56
  -2 -11  -4 1010.55  235.02
  -2 -11   4  972.54  279.65
   2 -11   5 2234.09  574.62
  -2  11   5 1802.00  263.26
  -2  11   5 2190.45  315.31
  -2  11  -5 2408.88  334.42
  -2 -11  -5 2120.55  586.24
  -2 -11   5 2960.78  695.69
  -2  11   5 2204.91  454.82
  -2 -11   5 2523.85  459.38
  -2  11  -5 1883.73  351.21
  -2 -11  -5 2178.71  379.89
   2 -11  -5 3542.60  383.67
   2 -11   5 2248.94  325.29
  -2 -11  -5 3151.27  859.66
  -2 -11   5 2050.74  336.06
   2 -11   6 8930.62 2012.27
  -2  11   6 6927.81  539.78
  -2  11   6 8370.42  832.66
  -2  11  -6 7216.23  564.21
  -2 -11  -6 7111.43 1655.30
  -2 -11   6 8588.63 1159.60
  -2  11   6 8117.06  640.32
  -2 -11   6 8563.99 1957.21
  -2  11  -6 8194.49  591.33
  -2 -11  -610216.13 1643.44
   2 -11  -6 7658.65  584.60
   2 -11   6 8284.71  637.93
  -2 -11  -6 8925.26 1006.93
  -2 -11   6 8315.85  615.54
   2 -11   7  -54.62  231.50
  -2  11   7  115.46  180.96
  -2  11   7  109.16  138.34
  -2  11  -7  384.83  209.80
  -2 -11  -7  289.61  185.70
  -2 -11   7  264.63  205.82
  -2  11   7   94.34  190.57
  -2 -11   7  145.14  161.51
  -2  11  -7  132.18  207.44
  -2 -11  -7  484.01  297.91
   2 -11  -7  346.33  206.83
  -2 -11  -7  100.22  144.77
  -2 -11   7   62.95  211.61
   2 -11   7  154.23  162.38
   2 -11   8  582.96  158.94
  -2 -11   8  544.31  186.44
  -2  11   8  368.99  186.03
  -2  11   8  406.94  165.29
  -2  11  -8  401.48  202.01
  -2 -11   8  475.74  131.18
  -2  11   8  663.28  220.09
  -2 -11   8  506.25  196.38
  -2  11  -8  634.93  256.23
  -2 -11  -8  406.39  218.02
   2 -11  -8  507.21  235.78
  -2 -11  -8  402.25  197.12
  -2 -11   8  839.45  324.16
   2 -11   8  493.47  165.16
  -2 -11   9 4195.34  662.70
   2 -11   9 5089.46 1385.91
  -2  11   9 4216.65  421.50
  -2  11   9 3863.30  493.63
  -2  11  -9 4483.37  421.38
  -2  11   9 4061.60  433.54
  -2 -11   9 5017.53  959.89
  -2  11  -9 4475.02  423.96
  -2 -11  -9 4645.87  953.66
   2 -11  -9 3726.23  383.40
  -2 -11  -9 4426.38  855.26
  -2 -11   9 3619.38  423.57
   2 -11   9 3935.58  463.03
  -2 -11  10 5360.02 1376.03
   2 -11  10 6803.20 1054.48
  -2  11  10 4778.86  425.41
  -2  11  10 3840.29  849.04
  -2  11 -10 5339.60  429.03
  -2  11  10 5402.07  476.79
  -2 -11  10 5867.42 1306.13
  -2  11 -10 6172.84  440.70
  -2 -11 -10 6376.18 1075.88
  -2 -11 -10 5745.89 1297.54
  -2 -11  10 4668.54  416.43
   2 -11  10 4978.80  395.14
  -2 -11  11  -70.48  122.23
   2 -11  11  338.23  202.54
  -2  11  11  304.37  248.67
  -2  11  11  346.99  185.80
  -2  11 -11  301.47  192.92
  -2  11  11  154.49  188.53
  -2  11 -11  391.81  187.37
   2  11 -11  429.90  275.98
   2 -11 -11  300.80  181.43
  -2 -11 -11  291.10  234.19
  -2 -11 -11  312.57  171.83
  -2 -11  11  325.10  179.49
   2 -11  11  159.77  158.09
   2 -11  12 1883.76  525.52
  -2 -11  12 1766.88  410.35
  -2  11  12 1547.35  246.39
  -2  11 -12 1536.54  246.62
  -2  11  12 1037.26  222.49
  -2  11 -12 1859.30  302.74
   2 -11 -12 1013.51  202.64
  -2 -11 -12 1670.71  355.05
  -2 -11 -12 1501.06  403.85
  -2 -11  12 1670.69  315.97
   2 -11  12 1114.55  219.27
   2 -11  13 2351.56  606.86
  -2 -11  13 1691.69  398.47
  -2  11  13 2413.66  317.50
  -2  11 -13 2869.62  342.43
  -2  11 -13 2236.11  284.08
   2  11 -13 2376.15  290.94
   2 -11 -13 2173.61  284.44
  -2 -11 -13 2608.35  449.91
  -2 -11 -13  692.96  609.69
  -2 -11  13 2061.09  302.19
   2 -11  13 2425.86  310.86
   2 -11  14 5863.49 1039.26
  -2 -11  14 4905.24 1029.48
  -2  11  14 4808.58  568.55
  -2  11 -14 5118.97  599.51
  -2  11 -14 4771.67  564.83
   2  11 -14 3928.49 1379.28
   2 -11 -14 3822.26  475.73
  -2 -11 -14 3381.77 1098.05
  -2 -11  14 5148.57  618.55
   2 -11  14 4735.60  562.63
  -2  11 -15 1287.99  286.05
   2  11 -15 1303.59  281.70
  -2 -11  15 1517.73  323.61
   2 -11  15 1048.47  251.77
   2 -12   0 4022.53 1163.23
  -2  12   0 3626.15  402.34
  -2 -12   0 4095.01  961.59
  -2  12   0 2774.71  363.63
  -2 -12   0 3650.59  441.68
   2 -12   0 3905.83  397.38
  -2 -12   0 4145.30  694.99
   2 -12   1 7778.37 1113.40
   2 -12  -1 6610.18  524.11
  -2  12   1 7274.30  513.64
  -2  12  -1 6717.76  534.60
  -2 -12  -1 7480.49 1269.15
  -2 -12   1 7541.66 1596.19
  -2  12   1 6560.09  604.22
  -2 -12  -1 7673.42  586.94
   2 -12   1 7609.55  631.02
   2 -12  -1 7544.16  583.15
  -2 -12  -1 7498.08 1559.67
  -2 -12   1 8257.48  586.31
   2 -12   2 6567.04 1250.75
  -2  12   2 4260.15  432.51
  -2  12   2 3722.85  372.73
  -2  12  -2 4821.00  486.85
  -2 -12  -2 4870.73 1485.32
  -2 -12   2 4603.57  761.96
  -2  12   2 5375.71  577.36
  -2 -12  -2 4688.12  493.31
   2 -12  -2 4666.02  975.88
   2 -12   2 4411.35  499.15
  -2 -12  -2 4202.51  659.28
  -2 -12   2 4315.86  457.84
   2 -12   3 1733.33  389.95
  -2  12   3 1302.12  249.20
  -2  12   3 1853.29  279.57
  -2  12  -3 1444.56  298.96
  -2 -12  -3 1584.78  368.94
  -2 -12   3 1234.11  408.58
  -2  12   3 1266.90  257.39
  -2  12  -3 1604.80  286.35
  -2 -12  -3 1154.88  283.85
   2 -12  -3 1813.22  392.57
   2 -12   3 1470.34  270.55
  -2 -12  -3 1328.71  311.00
  -2 -12   3 1093.36  257.54
   2 -12   4 1530.26  433.81
  -2  12   4  821.17  222.31
  -2  12   4 1107.78  236.86
  -2  12  -4  757.12  259.41
  -2 -12  -4 1600.06  421.79
  -2 -12   4 1232.77  306.29
  -2  12   4 1189.19  306.56
  -2 -12   4 1007.83  384.25
  -2  12  -4 1346.17  297.90
  -2 -12  -4  774.93  254.55
   2 -12  -4 1454.23  273.96
   2 -12   4 1005.30  301.29
  -2 -12  -4  919.09  223.22
  -2 -12   4 1225.44  323.33
   2 -12   5 9983.49  580.06
  -2  12   5 7561.55  517.51
  -2  12   5 8630.91  517.16
  -2  12  -5 8958.32  526.70
  -2 -12  -5 8755.98 1741.61
  -2 -12   5 8382.49 1627.92
  -2  12   5 8333.57  578.05
  -2 -12   5 8063.74 1582.26
  -2  12  -5 8911.76  553.54
  -2 -12  -5 8672.44  683.03
   2 -12  -5 7947.67  578.43
   2 -12   5 8128.56  561.40
  -2 -12  -5 8451.38 1666.10
  -2 -12   5 7768.10  520.00
   2 -12   6  166.73  143.82
  -2  12   6  -30.05  193.69
  -2  12   6  279.42  167.20
  -2  12  -6    4.38  212.21
  -2 -12  -6  176.22  162.47
  -2 -12   6  662.61  147.49
  -2  12   6  298.79  205.06
  -2 -12   6  499.86  204.34
  -2  12  -6  171.11  232.79
  -2 -12  -6  363.03  258.23
   2 -12  -6  308.70  248.83
   2 -12   6  -24.60  174.74
  -2 -12  -6  371.85  140.81
  -2 -12   6  149.54  227.98
   2 -12   7 4604.63  846.73
  -2  12   7 3552.64  414.53
  -2  12   7 2997.78  945.82
  -2  12  -7 3975.84  393.35
  -2 -12  -7 3306.42  732.55
  -2 -12   7 3960.91  903.97
  -2  12   7 3598.99  397.62
  -2 -12   7 4622.54 1173.44
  -2  12  -7 3674.76  369.78
  -2 -12  -7 4088.77  394.09
   2 -12  -7 4249.98  466.58
  -2 -12  -7 4633.69 1115.37
  -2 -12   7 2841.07  391.81
   2 -12   8 5867.60 1553.90
  -2  12   8 5636.01  403.75
  -2  12   8 4718.86 1120.08
  -2  12  -8 5455.74  462.07
  -2 -12   8 4525.28  893.72
  -2  12   8 7469.26  574.43
  -2  12  -8 6032.20  499.56
  -2 -12  -8 6266.35  476.67
   2 -12  -8 6150.50  475.91
  -2 -12  -8 6012.45 1147.86
  -2 -12   8 5780.96  454.01
   2 -12   8 6329.59  492.49
   2 -12   9 1418.23  359.94
  -2  12   9  836.85  245.01
  -2  12  -9 1383.51  301.76
  -2  12   9 1958.66  319.63
  -2  12  -9  905.36  245.18
   2  12  -9 1260.37  302.50
  -2 -12  -9 1398.71  238.35
   2 -12  -9 1202.92  221.40
  -2 -12  -9 1855.64  339.15
  -2 -12   9  555.51  261.46
   2 -12   9 1272.61  258.61
  -2 -12  10 1499.66  382.00
   2 -12  10 1032.13  743.09
  -2  12  10  988.49  255.57
  -2  12 -10 1313.70  297.32
  -2  12  10 1468.72  298.80
  -2  12 -10 1577.31  314.87
   2  12 -10 1520.93  293.62
  -2 -12 -10 1117.36  230.68
  -2 -12 -10 1224.12  322.34
  -2 -12  10 1469.43  248.16
   2 -12  10 1302.59  246.41
  -2 -12  11 1087.87  265.91
   2 -12  11 1782.78  382.10
  -2  12  11 1126.28  219.39
  -2  12 -11 1598.80  284.60
  -2  12  11 2137.73  297.64
  -2  12 -11 1405.23  211.53
   2  12 -11 1520.42  220.75
  -2 -12 -11 1875.15  322.20
  -2 -12 -11 1366.25  301.14
  -2 -12  11 1940.26  288.61
   2 -12  11 1926.72  286.41
   2 -12  12  513.41  213.24
  -2 -12  12  450.99  217.26
  -2  12  12  309.56  168.60
  -2  12 -12 1147.67  250.76
  -2  12  12  541.34  158.99
  -2  12 -12  725.70  241.37
   2  12 -12  428.23  169.38
  -2 -12 -12  487.87  230.14
  -2 -12  12  309.92  220.11
   2 -12  12  824.69  204.38
  -2 -12  13   30.78  163.90
   2 -12  13   84.42   68.11
  -2  12  13  436.96  176.82
  -2  12 -13  393.13  165.51
  -2  12 -13  714.89  170.76
   2  12 -13  548.64  163.59
  -2 -12 -13  496.96  140.17
  -2 -12  13  497.47  223.57
   2 -12  13  481.47  171.40
   2 -12  14  591.10  220.45
  -2  12 -14  732.83  191.67
  -2  12 -14  830.83  190.24
   2  12 -14  942.10  212.42
  -2 -12  14  763.25  206.68
  -2  13   0 2150.62  287.97
  -2 -13   0 2922.73  743.07
  -2  13   0 1890.87  338.52
  -2 -13   0 2316.70  361.35
   2 -13   0 3295.55  926.99
  -2 -13   0 2196.21  503.54
   2 -13   1 5950.55  440.09
  -2  13   1 5992.09  483.43
  -2  13   1 5548.83  471.30
  -2  13  -1 6093.58  446.01
  -2 -13   1 5979.22 1184.85
  -2 -13  -1 5759.24 1272.24
  -2  13  -1 5287.31  483.05
  -2  13   1 5248.13  491.19
  -2 -13  -1 5487.26  470.25
   2 -13   1 4757.19  433.41
   2 -13  -1 5732.04  684.30
  -2 -13  -1 5755.70  725.56
  -2 -13   1 4820.46 1110.98
   2 -13   2 2115.55  481.02
  -2  13   2 1410.65  338.23
  -2  13   2 1805.49  285.12
  -2  13  -2 1882.16  294.00
  -2 -13  -2 1586.39  276.29
  -2 -13   2 1650.18  526.06
  -2  13  -2 1606.06  288.88
  -2  13   2 1524.15  267.02
  -2 -13  -2 1770.88  304.00
   2 -13  -2 1051.42  253.32
   2 -13   2 1954.33  311.92
  -2 -13  -2 1710.26  424.86
  -2 -13   2 1234.57  451.60
   2 -13   3 1926.44  542.80
  -2  13   3 1559.97  264.98
  -2  13   3 2549.75  324.15
  -2  13  -3 2059.52  286.32
  -2 -13  -3 1849.90  463.26
  -2 -13   3 2134.79  405.38
  -2  13   3 2123.83  620.80
  -2  13  -3 1689.78  308.33
  -2 -13  -3 2412.88  393.01
   2 -13  -3 1813.70  329.05
   2 -13   3 2183.72  332.43
  -2 -13  -3 2817.66  525.42
  -2 -13   3 2662.84  410.52
   2 -13   413927.97  671.87
  -2  13   412872.19  636.37
  -2  13   413651.88  596.51
  -2  13  -412779.46  644.42
  -2 -13  -415014.53  662.39
  -2 -13   413241.07 1517.68
  -2  13   412690.63  614.40
  -2  13  -414574.21  660.63
  -2 -13  -412864.53  702.76
   2 -13   413715.28  679.03
  -2 -13  -414715.77 2388.15
  -2 -13   413216.71  648.88
   2 -13   5  661.48  194.49
  -2  13   5  462.09  195.30
  -2  13   5  375.48  195.88
  -2  13  -5  957.61  275.23
  -2 -13  -5  548.40  165.98
  -2 -13   5  791.23  215.44
  -2  13   5  508.48  197.41
  -2  13  -5  541.66  189.64
   2  13  -5  699.00  204.30
  -2 -13  -5  210.84  226.30
   2 -13  -5  644.17  225.30
   2 -13   5  869.50  281.22
  -2 -13  -5  103.82  172.01
  -2 -13   5  755.24  328.64
   2 -13   6 3308.86  645.36
  -2  13   6 2104.49  313.32
  -2  13  -6 2646.06  328.83
  -2 -13  -6 1701.94  593.71
  -2 -13   6 2310.46  618.24
  -2  13   6 3099.26  405.72
  -2  13  -6 2447.57  396.49
   2  13  -6 2592.16  316.86
  -2 -13  -6 2869.37  389.71
   2 -13  -6 2810.93  365.51
   2 -13   6 2609.14  341.15
  -2 -13  -6 2414.69  443.72
  -2 -13   6 2343.67  311.26
  -2  13   7 1158.75  212.98
  -2  13  -7  999.28  246.19
  -2 -13   7 1347.38  340.41
  -2  13   7 1260.49  251.01
   2  13   7 1090.63  246.71
  -2  13  -7 1083.21  247.64
   2  13  -7  915.13  236.51
  -2 -13  -7  918.45  295.76
   2 -13  -7 1581.33  296.85
  -2 -13  -7 1342.37  278.51
  -2 -13   7 1455.73  333.10
   2 -13   8 1922.33  398.70
  -2  13   8 1323.28  244.12
  -2  13  -8 1640.84  274.29
  -2 -13   8 1495.25  324.95
  -2  13   8 1608.18  303.58
   2  13   8 1326.20  258.82
  -2  13  -8 1555.90  248.21
   2  13  -8 1421.49  222.75
  -2 -13  -8 1504.63  248.24
   2 -13  -8 1978.48  328.06
  -2 -13  -8 1151.59  194.92
  -2 -13   8 1496.02  288.51
   2 -13   9 1693.05  317.89
  -2  13   9 1393.19  197.79
  -2  13  -9 1663.39  263.40
  -2  13   9 1525.97  263.20
  -2  13  -9 1682.14  300.88
   2  13  -9  960.20  226.91
  -2 -13  -9 1342.78  324.80
   2 -13  -9 1289.36  209.15
  -2 -13  -9 1477.95  219.46
  -2 -13   9 1573.33  272.92
   2 -13  10 1063.02  184.22
  -2  13  10  691.14  157.32
  -2  13 -10 1156.98  210.24
  -2  13  10  769.76  178.86
  -2  13 -10 1276.13  249.22
   2  13 -10 1158.28  249.36
  -2 -13 -10 1284.90  234.54
   2 -13 -10  460.12  143.37
  -2 -13 -10  864.50  215.21
   2 -13  10  939.34  248.84
   2 -13  11 1637.66  415.80
  -2  13  11  604.42  151.23
  -2  13 -11 1307.74  245.98
  -2  13  11  879.76  184.03
  -2  13 -11 1050.35  227.47
   2  13 -11  886.35  353.00
  -2 -13 -11 1589.92  340.01
  -2 -13  11 1040.16  202.66
   2 -13  11 1471.69  318.98
   2 -13  12  938.17  651.43
  -2  13 -12 1080.87  215.70
  -2  13  12 1042.06  229.97
  -2  13 -12 1290.87  286.93
   2  13 -12 1152.41  391.01
  -2 -13 -12 1685.31  368.04
  -2 -13  12 1477.01  326.04
   2 -13  13 1337.97  795.99
  -2  13 -13 1665.03  318.57
  -2  13 -13 2072.19  395.16
   2  13 -13 2451.52  452.06
  -2 -13  13 1812.21  364.38
  -2  14   0 4785.85  398.38
  -2  14   0 4195.33  340.25
  -2 -14   0 4420.65  736.46
  -2  14   0 5589.93 1096.23
  -2 -14   0 4203.40  383.27
   2 -14   0 4369.47  444.94
  -2 -14   0 5056.54 1161.01
  -2  14   1  810.22  230.17
  -2  14  -1 1071.83  261.28
  -2  14   1  907.07  261.55
  -2  14  -1  958.20  239.89
  -2 -14   1 1128.47  337.48
  -2 -14  -1 1326.90  314.86
  -2  14  -1  801.07  215.78
  -2  14   1 1243.76  374.75
  -2 -14  -1 1067.25  280.56
   2 -14  -1  940.82  238.66
   2 -14   1  870.69  252.82
  -2 -14  -1 1300.33  258.00
  -2 -14   1 1201.92  208.34
   2 -14   2 3081.57  830.35
  -2  14   2 2528.32  279.33
  -2  14   2 3220.09  373.17
  -2  14  -2 2685.06  299.69
  -2 -14  -2 2607.71  719.52
  -2 -14   2 3202.40  544.07
  -2  14   2 2752.72  354.66
  -2  14  -2 1876.82  287.56
  -2 -14  -2 2589.70  331.64
   2 -14  -2 2603.46  316.26
   2 -14   2 3369.22  347.21
  -2 -14  -2 2809.10  407.63
  -2 -14   2 2496.29  500.76
   2 -14   3 4190.39 1219.13
  -2  14   3 3091.06  295.87
  -2  14   3 2809.87  332.46
  -2  14  -3 3854.86  396.50
  -2 -14  -3 3190.86  695.10
  -2 -14   3 2961.05  571.07
  -2  14   3 3891.78  382.35
  -2 -14  -3 3503.08  372.05
   2 -14  -3 3322.29  605.31
   2 -14   3 2919.16  333.02
  -2 -14  -3 3990.94  931.25
  -2 -14   3 3137.17 1023.01
   2 -14   4 3316.97  952.15
  -2  14   4 3582.08  343.72
  -2  14  -4 3117.96  343.23
  -2 -14  -4 3072.19  503.86
  -2 -14   4 2815.48  466.40
  -2  14   4 2375.90  336.67
  -2  14  -4 2596.83  357.75
  -2 -14  -4 3085.86  328.93
   2 -14  -4 2686.64  381.91
   2 -14   4 2541.83  315.77
  -2 -14  -4 3127.82  484.43
  -2 -14   4 2779.21  922.45
   2 -14   5 1649.59  446.79
  -2  14   5 1572.00  258.27
  -2  14  -5 1143.19  247.87
  -2 -14  -5 1440.75  253.34
  -2 -14   5  897.36  213.45
  -2  14  -5  766.11  182.28
  -2 -14  -5  996.58  237.04
   2 -14  -5 1578.51  260.38
   2 -14   5 1215.51  263.68
  -2 -14  -5 1563.90  270.36
  -2 -14   5 1399.06  295.59
   2 -14   6 1552.79  552.11
  -2  14   6  939.66  242.11
  -2  14  -6  794.66  223.90
  -2 -14   6  668.97  140.37
  -2  14   6 1076.62  239.94
   2  14   6  924.48  254.83
  -2  14  -6  743.21  159.50
   2  14  -6  577.86  205.04
  -2 -14  -6 1282.82  321.40
   2 -14  -6 1145.10  237.08
  -2 -14  -6  763.49  144.71
  -2 -14   6 1135.73  225.90
   2 -14   7   42.18  101.70
  -2  14   7  -72.24  131.21
  -2  14  -7  446.63  150.18
  -2 -14   7   33.21   67.28
  -2  14   7  628.85  244.71
   2  14   7  149.73  144.37
  -2  14  -7  353.55  121.57
   2  14  -7   79.06   93.82
   2 -14  -7  121.40  145.64
  -2 -14  -7  311.41   94.50
  -2 -14   7  326.99  249.16
   2 -14   8 1296.73  383.44
  -2  14   8 1062.65  229.46
  -2  14  -8 1092.03  233.40
  -2  14   8  684.85  212.15
  -2  14  -8 1037.17  326.38
   2  14  -8 1071.00  448.41
  -2 -14  -8  582.29  132.99
   2 -14  -8 1177.46  246.49
  -2 -14  -8  890.64  261.49
  -2 -14   8  903.37  232.99
  -2  14   9  403.87  160.12
  -2  14  -9  168.39  118.85
  -2  14   9  309.71  139.99
  -2  14  -9  285.54  127.59
   2  14  -9  136.19   94.25
  -2 -14  -9  489.99  207.80
   2 -14  -9  215.09  196.58
  -2 -14   9   10.52  107.11
   2 -14  10 1132.02  596.33
  -2  14  10  981.16  243.86
  -2  14 -10 1240.85  211.21
  -2  14  10 1155.92  211.31
  -2  14 -10 1397.30  239.40
   2  14 -10 1778.89  431.80
  -2 -14 -10 1744.89  326.94
  -2 -14  10 1381.53  340.85
   2 -14  11  240.22  131.20
  -2  14 -11  265.04  131.92
  -2  14 -11  179.95  104.40
   2  14 -11  347.69  163.93
  -2 -14 -11  201.22  154.66
  -2 -14  11  757.46  264.75
  -2  15   0 1443.20  242.17
  -2 -15   0 1587.19  253.69
  -2  15   0 1291.09  253.39
  -2 -15   0  953.40  226.09
   2 -15   0 1255.68  264.59
  -2 -15   0 1362.18  219.44
  -2  15   1  173.60  147.65
  -2  15  -1  -34.14  140.31
  -2  15  -1  260.55  138.46
  -2 -15   1   48.75  153.82
  -2  15   1  288.67  139.83
  -2  15  -1   90.66  147.53
  -2 -15  -1   90.31  120.29
   2 -15  -1  430.39  213.64
   2 -15   1   36.95  111.57
  -2 -15  -1  194.17  146.97
  -2 -15   1  240.00  126.35
  -2  15   2   61.94  118.29
  -2  15  -2  511.23  170.83
  -2  15  -2  474.98  164.66
  -2 -15  -2  762.56  300.12
  -2 -15   2  591.20  238.70
  -2  15  -2  609.49  171.51
  -2  15   2  525.71  229.31
  -2 -15  -2  267.54  149.12
   2 -15   2  633.60  172.78
  -2 -15  -2  406.64  281.54
  -2 -15   2  563.29  211.67
  -2  15   3 5231.69  352.49
  -2  15  -3 4905.50  363.39
  -2  15  -3 5281.77  360.39
  -2 -15  -3 6120.37  874.63
  -2 -15   3 4645.68  808.01
  -2  15   3 5861.43  462.85
  -2 -15  -3 5151.68  393.65
   2 -15  -3 5002.37  395.46
   2 -15   3 5463.99  380.42
  -2 -15  -3 5445.65  843.83
  -2 -15   3 4511.18  740.84
  -2  15   4  920.51  264.95
  -2  15  -4  794.58  184.38
  -2 -15  -4  538.08  152.15
  -2 -15   4  710.60  259.12
  -2  15   4  712.86  298.13
  -2 -15  -4  676.82  238.30
   2 -15  -4  648.25  248.90
   2 -15   4  650.69  292.07
  -2 -15  -4  383.03  172.66
  -2 -15   4  659.06  179.34
   2 -15   5 4199.95  972.85
  -2  15   5 3814.73  385.45
  -2  15  -5 4758.14  419.84
  -2 -15   5 3420.58  884.22
   2  15   5 3899.57  406.36
  -2 -15  -5 4210.20  976.45
   2 -15  -5 5657.74  452.13
   2 -15   5 4984.81  425.20
  -2 -15  -5 3813.24  594.53
  -2 -15   5 4812.36  787.69
   2 -15   6  539.52  227.40
  -2  15   6  726.44  204.78
  -2  15  -6  385.26  199.08
  -2 -15   6  529.70  226.72
  -2  15   6  613.29  202.30
   2  15   6  786.54  223.22
  -2  15  -6  554.06  177.89
  -2 -15  -6  493.56  152.86
   2 -15  -6  324.05  166.66
  -2 -15  -6  443.88  240.18
  -2 -15   6  860.47  215.39
   2 -15   7  756.53  299.07
  -2  15   7 1082.54  244.79
  -2  15  -7  723.10  162.74
  -2  15   7  727.05  190.92
   2  15   7  297.04  147.17
  -2 -15  -7  796.62  166.04
   2 -15  -7  710.91  179.81
  -2 -15   7  371.61   95.87
   2 -15   8  641.47  216.70
  -2  15  -8  683.24  157.61
  -2  15   8  647.16  224.09
  -2  15  -8  594.49  168.09
   2  15  -8  496.17  179.53
  -2 -15  -8  725.27  238.64
   2 -15  -8  248.45  270.70
  -2 -15   8  661.20  225.85
   2 -15   9 2926.19  520.93
  -2  15   9 3151.80  579.93
  -2  15  -9 3683.47  662.36
  -2 -15  -9 2748.16  827.65
  -2 -15   9 2689.82  865.76
  -2  16   0  287.71  131.71
  -2 -16   0   95.38   72.99
  -2  16   0  107.85  129.44
   2 -16   0  113.31  157.64
  -2 -16   0   58.66   96.66
  -2  16   1  909.19  191.69
  -2  16  -1 1374.45  241.29
  -2 -16   1  728.52  325.64
  -2 -16  -1  968.83  354.47
  -2  16   1  966.67  217.02
  -2  16  -1 1031.42  272.67
  -2 -16  -1  652.22  273.43
   2 -16   1 1100.46  230.17
   2 -16  -1  896.48  247.85
  -2 -16  -1 1111.66  250.39
  -2 -16   1 1087.59  232.32
  -2  16   2 1643.27  261.12
  -2  16  -2 1489.64  249.08
  -2 -16   2 1363.86  401.84
  -2 -16  -2 1067.07  256.41
  -2  16   2 1515.63  261.27
  -2 -16  -2  382.33  519.67
   2 -16  -2 1310.09  237.54
   2 -16   2 1028.31  197.43
  -2 -16  -2 1349.01  324.77
  -2 -16   2 1377.18  432.54
  -2  16   3  339.29  154.53
  -2  16  -3  744.95  185.60
  -2 -16   3  466.03  176.34
  -2  16   3  659.87  198.20
   2  16   3  580.76  177.69
  -2 -16  -3   81.19  110.73
   2 -16  -3  493.76  190.49
   2 -16   3  371.72  168.45
  -2 -16  -3  131.22   97.48
  -2 -16   3  554.49  189.42
  -2  16   4  135.04  130.66
  -2  16  -4  147.51  108.94
  -2 -16   4   51.09   80.79
  -2  16   4  346.07  199.00
   2  16   4   57.14  103.21
  -2 -16  -4   59.34   88.68
   2 -16  -4  154.05  128.66
   2 -16   4  124.18  160.79
  -2 -16  -4  106.91   60.96
  -2 -16   4  -76.51   98.51
  -2  16   5  360.91  175.65
  -2  16  -5  496.07  154.05
  -2  16   5  468.17  186.75
   2  16   5  370.65  147.31
  -2 -16  -5  355.73   91.41
   2 -16  -5  698.12  203.33
  -2 -16   5  404.39  135.68
  -2  16  -6 1597.21  343.89
  -2  16   6 1074.14  220.51
  -2 -16  -6 1085.74  246.80
   2 -16  -6 1578.88  337.11
  -2 -16   6 1221.03  477.58
  -2  16   7  752.03  164.72
   2  17   1 2226.90  438.02
  -3   0   0  277.79  106.50
  -3   0   0  120.70   71.40
  -3   0   0  324.06  134.70
  -3   0   0   85.59  137.88
  -3   0   0   -3.93  178.24
  -3   0   0  146.03   97.46
   3   0   0  339.11  254.08
   3   0   0  100.33   84.20
  -3   0   119979.90  505.41
  -3   0   119639.68  522.92
  -3   0  -119310.41  517.06
  -3   0   119871.34  593.68
  -3   0  -118194.69  545.31
  -3   0  -117252.11  546.73
  -3   0  -119245.52  765.72
   3   0  -117541.67  592.39
   3   0  -119926.93  545.15
   3   0   120420.71  598.00
   3   0   120236.35  504.11
  -3   0   2 6523.56  435.90
  -3   0  -2 6802.50  289.35
  -3   0   2 5468.60  363.16
  -3   0  -2 6070.20  307.74
  -3   0  -2 6125.13  476.66
  -3   0   2 5846.53  785.84
  -3   0   2 6000.14  374.60
  -3   0  -2 6045.70  372.44
  -3   0  -2 6392.90  383.48
   3   0  -2 5810.30  388.19
  -3   0  -2 6783.44  387.49
   3   0  -2 5742.22  422.10
   3   0  -2 6257.68  343.15
   3   0   2 6400.49  394.47
  -3   0   2 7108.92  301.95
   3   0   2 6188.99  323.11
  -3   0   3  294.13  109.83
  -3   0  -3  202.93   56.94
  -3   0   3  358.83  170.30
  -3   0  -3  364.30   80.00
  -3   0  -3  213.31   35.30
  -3   0   3  318.36  188.06
  -3   0   3  372.72  119.42
  -3   0  -3  140.88  186.04
  -3   0  -3  436.81  111.23
   3   0  -3  113.64  209.46
  -3   0  -3  403.70  134.72
   3   0  -3  739.07  334.54
   3   0   3  302.15  225.42
  -3   0   3  291.33  121.69
   3   0   3  386.78  183.32
  -3   0   474487.45 2627.50
  -3   0  -475861.51 2375.40
  -3   0   473158.85 2386.58
  -3   0  -477270.07 2451.63
  -3   0   474097.85 2443.27
  -3   0   475167.95 2654.40
  -3   0  -472132.97 2348.73
  -3   0  -472678.76 2409.31
   3   0  -472330.93 2411.97
  -3   0  -471547.57 2371.84
   3   0  -473947.72 2437.93
   3   0   474819.32 2481.15
   3   0   473807.67 2405.61
  -3   0   518831.55  936.76
  -3   0   519057.26  755.89
  -3   0  -517919.33  682.06
  -3   0   518210.71  769.75
  -3   0   519223.44  776.66
  -3   0  -517404.90  699.28
  -3   0  -518370.08  757.63
   3   0  -518131.13  793.14
  -3   0  -518731.53 1041.46
   3   0  -516339.29  704.97
   3   0   518800.02  763.93
  -3   0   632634.05 1159.35
  -3   0   631332.51 1132.17
  -3   0  -631521.95 1081.80
  -3   0   632904.62 1392.84
  -3   0   634552.08 1239.42
  -3   0  -630595.59 1070.71
  -3   0  -630744.25 1186.43
   3   0  -631008.99 1161.13
  -3   0  -629344.92 1104.23
   3   0  -631592.34 1162.59
   3   0   631927.07 1182.18
   3   0   634223.36 1355.80
  -3   0   722130.29  920.85
  -3   0   725504.41 1046.62
  -3   0  -723443.33  934.13
  -3   0   723584.48 1005.25
  -3   0  -723084.98  905.52
   3   0  -722846.36 1024.67
  -3   0  -722070.57  948.40
   3   0  -723615.84 1009.26
  -3   0  -722054.76 1143.90
   3   0  -721658.43  917.92
   3   0   724386.18 1054.20
   3   0   723859.58  979.23
  -3   0   819066.30  886.79
   3   0  -817731.15  823.89
  -3   0   819370.10  908.26
   3   0  -817449.28  863.52
  -3   0  -816309.86  793.87
   3   0  -817830.44  861.16
  -3   0  -817345.85 1240.87
   3   0  -818995.70  866.92
   3   0   818344.35  879.88
   3   0   818106.23  871.43
  -3   0   9   95.70  189.36
   3   0  -9  591.29  209.61
  -3   0   9  138.38  162.84
   3   0  -9   93.94  205.67
  -3   0  -9  127.69  121.98
   3   0  -9  263.92  184.05
  -3   0  -9  657.51  220.08
   3   0  -9  199.70  197.19
   3   0   9  497.75  197.08
   3   0   9  540.00  214.90
  -3   0  10 6299.95 1559.99
   3   0 -10 5504.47  451.13
  -3   0  10 6484.35 1279.17
  -3   0 -10 6092.50 1622.09
   3   0 -10 6553.39  581.42
  -3   0 -10 5913.23 1202.83
   3   0 -10 7012.23  580.66
   3   0  10 7137.37  642.62
   3   0  10 9090.33  646.63
  -3   0  11 1740.08  585.14
   3   0 -11 3073.65  469.80
  -3   0  11 1918.18  812.65
  -3   0 -11 2088.61  673.41
   3   0 -11 2332.67  589.34
  -3   0 -11 2105.59  909.44
   3   0 -11 2368.96  466.82
   3   0  11 3135.08  466.16
   3   0  11 3135.17  502.70
  -3   0  11 1599.25  285.59
  -3   0  11 2278.94  498.38
  -3   0  11 2221.86  455.40
  -3   0 -11 2371.04  411.37
  -3   0 -11 2371.11  365.46
  -3   0 -11 2192.19  551.18
  -3   0  12 1062.21  489.21
   3   0 -12 1163.19  399.50
  -3   0 -12 1054.01  352.70
   3   0 -12 1327.62  434.65
  -3   0 -12  260.78  296.59
   3   0 -12 1640.39  476.57
   3   0  12 1330.77  439.21
  -3   0  12 1355.32  446.41
  -3   0  12 1136.77  244.75
  -3   0  12  415.94  268.30
  -3   0 -12 1962.99  451.94
  -3   0 -12  692.06  228.21
   3   0 -12 1443.28  339.69
  -3   0 -12 1263.11  389.94
  -3   0  13 5061.15  515.38
  -3   0  13 6043.67 1419.78
  -3   0 -13 5552.83  512.54
   3   0 -13 4648.35  491.09
  -3   0 -13 5231.12  893.49
   3   0 -13 5285.29  816.59
  -3   0 -13 5777.00 1449.32
  -3   0  14   69.66  213.71
  -3   0  14   96.35  131.48
  -3   0 -14  298.66  241.66
   3   0 -14  249.35  208.87
  -3   0 -14  160.14  188.45
   3   0 -14   -9.51  153.18
  -3   0 -14  175.73  174.57
  -3   0  15  -51.89  206.29
  -3   0  15  310.61  166.18
  -3   0 -15  473.17  227.36
   3   0 -15  334.78  295.46
  -3   0 -15  121.31  174.83
   3   0  15   -9.72  107.85
  -3   0  16 3323.15  384.03
  -3   0  16 4307.95  946.86
  -3   0 -16 3820.95  379.95
   3   0 -16 3921.07  400.82
  -3   0 -16 3777.92  345.62
   3   0  16 3986.04  473.36
  -3   0  17 4355.53 1030.60
  -3   0 -17 3836.66  374.05
   3   0 -17 3258.76  366.07
  -3   0 -17 3233.52  535.74
  -3   0  18  435.86  112.22
  -3   0 -18  597.12  161.96
   3   0 -18  806.52  207.64
   3   0  18  583.05  234.36
  -3   0  19 3423.26 1249.02
  -3   0 -19 5901.69 1011.96
   3   0 -19 5015.73  866.18
   3   0  19 6550.36 1124.80
  -3  -1   0 1969.08  274.75
  -3   1   0 2091.92  159.76
  -3  -1   0 2129.11  277.17
  -3   1   0 1916.96  636.78
  -3  -1   0 2315.24  740.73
  -3   1   0 1807.47  211.60
  -3  -1   0 1847.61  584.71
  -3   1   0 1720.81  475.99
  -3   1   0 1269.19  528.66
  -3  -1   0 2183.50  751.62
  -3  -1   0 1692.69  588.24
   3  -1   0 1607.92  211.22
   3  -1   0 2286.73  258.38
   3   1   0 1943.57  238.93
  -3  -1   0 1946.15  594.24
   3  -1   0 1978.42  117.09
  -3  -1   154237.57 1746.74
  -3   1   151795.06 1683.27
  -3   1  -153824.93 1724.38
  -3  -1   154084.28 1737.33
  -3  -1  -155326.55 1734.56
  -3   1   152344.54 1726.34
  -3   1  -152736.99 1823.61
  -3  -1  -148571.57 1606.08
  -3  -1   151204.31 1704.16
  -3   1   151068.47 1700.54
  -3   1  -152254.46 1706.97
  -3  -1   152061.53 1740.07
  -3  -1  -146601.31 1708.74
  -3   1   154099.67 1805.14
  -3   1  -147879.39 1699.32
  -3   1   151117.41 1918.59
  -3  -1   151517.24 1726.42
  -3  -1  -147987.07 1636.02
  -3   1  -148455.01 1651.81
  -3   1  -149043.30 1655.89
  -3  -1  -154677.28 1821.02
   3  -1  -148024.63 1653.66
   3   1  -150959.74 1729.89
  -3  -1  -150812.65 1703.92
   3  -1  -152467.50 1733.36
   3  -1   151401.82 1724.32
   3   1  -156797.03 1839.89
  -3  -1  -152689.39 1713.29
  -3  -1   153349.84 1727.21
   3  -1   155425.33 1757.18
  -3  -1   231961.71 1083.09
  -3   1   230979.30 1094.69
  -3   1  -233437.40 1129.70
  -3  -1   231701.27 1087.41
  -3   1   231752.39 1126.56
  -3  -1  -235492.44 1137.86
  -3   1  -231540.35 1116.66
  -3  -1  -233625.28 1146.92
  -3  -1   230451.84 1181.74
  -3   1  -233012.73 1172.14
  -3   1   233164.57 1205.12
  -3  -1   230824.49 1116.77
  -3  -1  -232106.37 1135.72
  -3   1   230141.73 1093.43
  -3   1  -230690.10 1186.05
  -3  -1  -231277.66 1237.11
  -3   1  -228777.53 1080.68
   3  -1  -231029.29 1146.51
   3   1  -230220.44 1149.42
  -3   1  -232378.86 1173.88
  -3  -1  -232689.25 1192.97
   3   1  -230441.26 1119.10
   3  -1  -231598.30 1173.42
  -3  -1  -232558.85 1193.54
   3  -1  -232963.68 1143.23
   3   1  -233454.86 1136.58
   3  -1   231548.56 1165.95
  -3  -1   231742.70 1119.28
   3  -1   234283.43 1165.17
   3   1   232802.01 1150.10
  -3  -1   3 7904.87  400.51
  -3   1   3 8243.82  453.42
  -3   1  -3 7863.84  379.10
  -3  -1   3 7522.04  430.35
  -3   1   3 7373.18  421.12
  -3  -1  -3 7442.55  402.75
  -3   1  -3 7497.45  407.50
  -3  -1  -3 7493.76  433.79
  -3   1  -3 7934.93  351.92
  -3  -1   3 7703.62  516.00
  -3   1   3 7439.61 1011.13
  -3  -1   3 7573.64  433.03
  -3   1   3 7447.82  410.79
  -3  -1  -3 7348.75  384.74
  -3   1  -3 7076.20  405.68
  -3  -1  -3 6998.43  437.06
  -3   1  -3 8083.77 1091.30
   3  -1  -3 6995.01  425.22
   3   1  -3 8089.32  501.94
  -3   1  -3 7115.05  426.55
  -3  -1  -3 6993.67  411.36
   3   1  -3 6597.50  422.04
   3  -1  -3 7644.71  495.43
  -3  -1  -3 7274.79  460.60
   3  -1  -3 8182.96  394.77
   3   1  -3 7702.90  341.40
   3  -1   3 7937.58  497.53
  -3  -1   3 7709.57  363.55
   3  -1   3 7261.47  380.15
   3   1   3 8552.11  458.20
  -3  -1   428365.25 1043.92
  -3   1   428357.94 1261.23
  -3   1  -430178.64 1068.93
  -3  -1   430706.15 1127.10
  -3   1   428319.66 1077.74
  -3   1  -429161.42 1071.12
  -3  -1   428547.04 1106.28
  -3   1   428265.64 1173.51
  -3  -1   431225.66 1183.86
  -3   1   429144.95 1092.52
  -3  -1  -429905.22 1089.82
  -3   1  -427299.66 1241.87
  -3   1  -428175.64 1130.47
  -3  -1  -429902.46 1136.25
   3   1  -430452.29 1199.66
   3  -1  -428322.04 1123.31
  -3   1  -430222.95 1160.93
  -3  -1  -429505.43 1136.58
   3   1  -428362.54 1074.38
   3  -1  -430598.16 1189.91
  -3  -1  -429648.49 1166.50
   3  -1  -430112.52 1039.07
   3  -1   429469.53 1156.12
  -3  -1   429589.25 1036.36
   3  -1   430611.45 1133.31
   3   1   428942.00 1074.92
  -3  -1   523747.98  890.14
  -3   1   524530.91  914.38
  -3   1  -526399.87  914.17
  -3  -1   522768.09  858.68
  -3   1   520866.09 1203.66
  -3   1  -523906.24  889.38
  -3  -1   524453.98  950.36
  -3   1   522989.05 1026.59
  -3  -1   526502.96  993.40
  -3   1   523244.57 1162.53
  -3  -1  -525532.13  894.25
  -3   1  -524533.04  903.02
  -3  -1  -523098.96  907.03
  -3   1  -523281.20 1664.41
   3  -1  -525614.61  984.38
   3   1  -523535.43  943.94
  -3   1  -524125.65  918.36
  -3  -1  -523271.00  891.86
   3   1  -523056.73  867.49
   3  -1  -524990.52  953.53
  -3  -1  -523339.26  958.36
   3  -1   523100.92  904.60
  -3  -1   523700.38 1071.15
   3  -1   524557.31  915.41
  -3  -1   6 8109.04  538.00
  -3   1   6 8729.71  490.36
  -3   1  -6 8801.86  451.35
  -3   1   6 8483.86  520.67
  -3   1  -6 8676.22  485.52
   3   1  -6 7192.85  473.62
  -3  -1   6 9201.96  560.75
  -3   1   6 8208.97  875.84
  -3  -1   6 7672.66  478.66
  -3   1   6 8806.93  525.05
  -3  -1  -6 8356.04  442.75
  -3   1  -6 8583.34  575.26
  -3  -1  -6 8385.26  526.98
  -3   1  -6 6663.54  435.57
   3   1  -6 7958.95  542.58
   3  -1  -6 7817.45  512.24
  -3  -1  -6 9310.10  630.17
  -3   1  -6 7665.53  458.90
   3   1  -6 8614.68  525.88
   3  -1  -6 7596.47  489.30
  -3  -1  -6 8628.40  566.11
   3  -1   6 7718.70  523.79
   3  -1   6 8879.42  491.23
   3   1   6 8128.27  496.57
  -3  -1   712048.62  622.31
  -3   1   710982.39 1061.22
  -3   1  -711714.26  595.28
  -3   1   712106.33  736.68
  -3   1  -713463.98  658.06
   3   1  -710919.76  591.30
  -3  -1   711706.66  668.60
  -3   1   711319.85  618.84
  -3   1   712234.37  625.62
  -3   1  -710541.53  547.75
   3   1  -711818.09  681.77
  -3  -1  -710419.51  595.14
  -3   1  -711223.43  615.00
   3  -1  -711534.75  651.92
   3   1  -710798.40  633.11
  -3   1  -710635.31  581.74
  -3  -1  -710971.41  782.46
   3  -1  -711514.28  619.50
   3   1  -710417.57  574.25
   3  -1   711293.29  663.59
   3   1   711617.73  675.47
   3  -1   711093.83  616.83
   3   1   711381.01  625.62
  -3  -1   818864.38  902.95
  -3   1   817708.41  844.59
  -3   1   819225.23  926.23
  -3   1  -817717.79  843.31
   3   1  -819038.85  862.59
  -3  -1   818177.96  851.91
  -3   1   819096.60  956.51
  -3   1  -820464.31  891.43
   3   1  -817939.90  919.11
   3  -1  -820569.38  957.16
  -3   1  -818868.46 1224.94
  -3  -1  -819686.69  938.34
   3  -1  -818474.36  915.21
   3   1  -818648.61  897.17
  -3   1  -819047.63  888.33
  -3  -1  -818017.10  899.57
   3  -1  -818460.63  881.59
   3   1  -818917.76  863.75
   3  -1   817653.87  848.86
   3   1   817608.35  883.48
   3  -1   818649.81  883.47
   3   1   818216.88  863.89
  -3  -1   9 4776.26 1494.23
  -3   1   9 6172.50 1842.96
  -3   1  -9 5636.25  481.80
   3   1  -9 5708.41  499.55
  -3  -1   9 5803.41 1425.79
  -3   1   9 5635.74 1589.05
   3   1  -9 6061.48  654.21
  -3   1  -9 4912.53 1052.30
  -3  -1  -9 5353.90 1461.18
   3  -1  -9 6729.97  543.91
   3   1  -9 5659.85  501.27
  -3   1  -9 5920.37 1585.60
  -3  -1  -9 4753.93 1144.73
   3   1  -9 6140.34  481.68
   3  -1  -9 5383.89  460.91
   3  -1   9 5819.46  493.86
   3   1   9 4573.67  466.81
   3  -1   9 6253.54  533.62
   3   1   9 6376.68  570.26
  -3  -1  10 1306.48  390.09
  -3   1  10 2326.23  639.13
   3   1 -10 1513.41  428.02
   3  -1 -10 2268.08  315.53
  -3  -1  10 1569.12  576.92
  -3   1  10 1506.97  609.44
   3   1 -10 1880.38  321.86
  -3   1 -10 1801.89  311.52
  -3  -1 -10 2192.41  586.02
   3  -1 -10 1677.51  306.80
   3   1 -10 3019.33  393.64
  -3   1 -10 1691.01  519.07
  -3  -1 -10 1610.70  236.21
   3  -1 -10 3274.13  390.02
   3   1 -10 1928.87  355.00
   3  -1  10 1763.31  358.58
   3   1  10 2411.82  395.27
   3  -1  10 1905.71  355.77
   3   1  10 1808.77  299.70
  -3  -1  11 5077.97 1290.92
  -3   1  11 5700.24 1632.01
   3   1 -11 5714.68  659.49
   3  -1 -11 5905.79  682.95
  -3  -1  11 5075.75 1258.16
  -3   1  11 4617.66 1379.93
  -3  -1 -11 3446.39 1147.33
  -3   1 -11 4302.90 1150.30
   3   1 -11 4398.63 1168.25
   3  -1 -11 6815.62  732.30
  -3   1 -11 3624.76 1173.85
  -3  -1 -11 3550.19 1264.79
   3  -1 -11 6097.95  713.98
   3  -1  11 5866.92  722.50
   3   1  11 4498.22  565.57
   3  -1  11 5216.40  669.76
   3   1  11 7686.81  855.50
  -3  -1  11 4526.73  542.34
  -3   1  11 5146.77  593.27
  -3  -1  11 4757.01  898.82
  -3   1  11 4706.54  806.65
  -3  -1  11 4248.80  894.76
  -3   1  11 4331.49  688.53
  -3   1 -11 5305.58  927.18
  -3  -1 -11 4057.16  794.89
  -3  -1 -11 4153.41  527.26
   3  -1 -11 3961.64  494.71
  -3   1 -11 3476.55  659.83
  -3  -1 -11 5049.34 1226.43
  -3  -1  12 3879.19 1014.24
  -3   1  12 3984.63 1425.61
   3   1 -12 4877.53  725.01
   3  -1 -12 4242.46  748.59
  -3  -1 -12 3377.19 1212.09
  -3   1 -12 3945.37 1386.15
   3   1 -12 5635.17  845.35
   3  -1 -12 5222.83  778.72
  -3  -1 -12 3304.13 1940.00
  -3   1 -12 1971.32 1342.02
   3  -1 -12 4968.93  770.93
   3   1  12 5070.29  786.23
   3  -1  12 4879.50  765.64
   3   1  12 5124.78  792.44
  -3  -1  12 3924.12  596.33
  -3   1  12 4210.28  627.45
  -3  -1  12 4972.42  987.11
  -3   1  12 5146.62 1143.14
  -3   1 -12 5364.85 1424.10
  -3  -1 -12 4486.96  925.67
  -3  -1 -12 6178.73 1156.82
  -3   1 -12 3538.02  525.93
   3  -1 -12 3772.75  543.95
  -3   1 -12 5142.07 1339.55
  -3  -1 -12 4820.10 1227.41
  -3  -1  13  277.00  221.39
  -3   1  13  130.58  311.21
  -3  -1  13  292.89  163.23
  -3   1  13  182.64  181.56
  -3   1 -13   44.68  185.49
  -3  -1 -13  422.63  290.98
   3   1 -13  417.33  309.29
   3  -1 -13    6.10  278.86
  -3   1 -13  392.04  246.49
  -3  -1 -13   97.04  225.85
   3  -1 -13  551.26  261.39
  -3   1 -13  -55.90  248.40
  -3  -1 -13  256.09  129.23
  -3  -1  14 9081.06  668.14
  -3   1  14 8956.48  634.34
  -3  -1  1411049.87 1941.30
  -3   1  14 9428.39 1301.64
  -3  -1 -14 9057.00  665.58
  -3   1 -14 9381.32  660.04
   3   1 -14 9176.81  658.85
   3  -1 -14 8703.64 1867.61
  -3   1 -14 8081.45  604.75
  -3  -1 -1410916.22  733.86
   3  -1 -14 9182.15  664.02
  -3  -1 -14 9483.55 1696.63
   3  -1  1410995.36 2068.38
  -3  -1  1511253.54  643.48
  -3   1  1512831.66  678.18
  -3  -1  1512237.25  643.19
  -3   1  1510020.51  569.20
  -3   1 -1511904.75  632.04
  -3  -1 -1510455.28  637.79
   3   1 -1510819.37  613.15
  -3   1 -1511626.14  653.95
  -3  -1 -1511626.15  678.67
   3  -1 -1510950.70  619.71
  -3  -1 -1511293.13  598.10
   3  -1  1511574.51  664.15
  -3  -1  16 1819.24  450.65
  -3   1  16 1775.62  282.41
  -3  -1  16 2015.88  498.90
  -3   1  16 1807.53  628.28
  -3   1 -16 1900.73  306.81
  -3  -1 -16 1682.66  311.06
   3  -1 -16 1523.96  273.72
   3   1 -16 1402.87  257.08
  -3  -1 -16 1784.55  280.84
   3  -1 -16 1317.85  264.90
   3   1  16 2361.42  573.57
   3  -1  16 2355.28  492.87
  -3  -1  17 5516.65 1180.92
  -3  -1  17 5951.42 1081.88
  -3   1  17 4218.47  799.23
  -3  -1 -17 5301.80  784.40
  -3   1 -17 4815.67  666.52
   3  -1 -17 4251.76  365.70
   3   1 -17 5043.30  405.31
  -3  -1 -17 5091.35  418.61
   3  -1  17 3731.42  374.46
   3   1  17 4600.82  429.10
  -3  -1  18 1748.46  337.37
  -3   1  18 2473.60  468.62
  -3  -1  18 1353.34  292.19
  -3   1  18 1743.93  501.11
  -3  -1 -18 2131.45  327.47
  -3   1 -18 2009.00  280.69
   3   1 -18 1628.18  260.18
   3  -1 -18 2084.56  295.68
  -3  -1 -18 1068.14  487.61
   3   1  18 2121.19  645.35
   3  -1  18 1921.26  437.08
  -3   1  19 2696.28  598.14
  -3  -1  19 2790.26  681.32
  -3  -1  19 1991.99  747.57
  -3   1  19 1881.08  782.60
  -3   1 -19 1928.10  521.25
  -3  -1 -19 2106.86  629.61
   3   1 -19 3289.14  594.26
   3  -1 -19 2438.79  463.36
   3   1  19 3330.90  620.02
  -3   2   0 7391.73  388.25
  -3   2   0 7554.55  412.60
  -3  -2   0 6956.57  487.83
  -3   2   0 7316.49  396.23
  -3  -2   0 6907.01  395.73
  -3   2   0 7367.11  520.02
  -3  -2   0 7609.68  451.34
  -3   2   0 7528.31  405.45
  -3  -2   0 5806.92  406.16
   3  -2   0 6783.28  424.46
  -3  -2   0 6956.27  380.57
   3  -2   0 7384.30  396.33
  -3  -2   0 7219.55  379.44
  -3  -2   124392.02  806.11
  -3   2   121391.27  835.58
  -3   2  -121994.22  825.46
  -3   2   121808.44  853.84
  -3   2  -121531.00 1019.20
   3   2  -123280.01  788.26
  -3  -2  -123715.12  885.53
  -3  -2   120932.10  816.37
  -3   2   120159.47  795.19
  -3   2  -122981.24  859.32
  -3  -2   121627.49  842.09
  -3  -2  -120730.99  818.82
  -3   2   121251.37  851.74
  -3   2  -122149.67  877.38
  -3  -2   122318.14 1046.13
  -3   2   121999.07 1105.29
  -3  -2  -120778.33  822.21
  -3   2  -122481.59  875.26
  -3  -2  -120125.13  982.79
   3  -2  -122517.94  905.01
   3   2  -120681.12  818.18
  -3  -2   122629.33  852.47
  -3  -2  -122475.98  890.71
   3  -2  -121138.17  835.76
   3  -2   121808.03  853.68
  -3  -2  -121772.72  838.91
  -3  -2   120461.44  821.13
   3  -2   124167.02  829.73
  -3  -2   2 4351.94  247.35
  -3   2   2 4239.84  298.23
  -3   2  -2 4288.69  285.85
  -3   2   2 4009.64  295.91
  -3   2  -2 4273.25  314.79
   3   2  -2 4321.27  244.18
  -3  -2  -2 3871.89  443.95
  -3  -2   2 3936.94  301.42
  -3   2   2 3476.19  286.69
  -3   2  -2 3685.71  240.75
  -3  -2   2 3706.25  301.66
  -3  -2  -2 4007.72  288.33
  -3   2   2 4152.69  297.43
  -3   2  -2 4001.40  305.66
  -3  -2  -2 4530.57  368.69
  -3   2  -2 4862.96  345.15
   3  -2  -2 3385.06  330.49
   3   2  -2 3988.61  341.56
  -3   2  -2 3989.81  313.63
  -3  -2  -2 4314.80  464.76
   3  -2  -2 4510.78  390.90
   3   2  -2 4160.62  338.78
  -3  -2  -2 4449.17  368.39
   3  -2  -2 4088.70  300.50
   3  -2   2 4066.99  364.68
   3   2  -2 4081.54  251.40
  -3  -2  -2 3733.48  265.50
  -3  -2   2 4397.34  275.77
   3  -2   2 4286.95  258.72
  -3  -2   3 6128.19  335.92
  -3   2   3 6617.40  400.62
  -3   2  -3 6091.20  347.66
  -3   2   3 5173.08  390.38
  -3   2  -3 5453.29  369.56
   3   2  -3 5890.76  326.09
  -3  -2  -3 6425.31  338.99
  -3  -2   3 5871.99  382.96
  -3   2  -3 6678.75  328.13
  -3   2   3 5744.68  387.68
  -3  -2   3 6181.88  629.26
  -3   2   3 6077.02  658.87
  -3  -2  -3 5624.28  464.58
  -3   2  -3 5232.59  384.23
  -3  -2  -3 6566.48  593.62
  -3   2  -3 6734.61  411.02
   3  -2  -3 5962.87  416.77
   3   2  -3 5742.80  414.77
  -3   2  -3 6088.62  382.24
  -3  -2  -3 6628.16  812.57
   3  -2  -3 5683.48  380.88
   3   2  -3 6207.54  424.82
  -3  -2  -3 4630.10  430.86
   3  -2  -3 6089.52  355.99
   3  -2   3 5919.60  396.80
   3   2  -3 6781.49  329.15
  -3  -2   3 7214.68  389.53
   3  -2   3 6269.72  346.97
   3   2   3 6023.79  369.99
  -3  -2   418249.00  737.75
  -3   2   419953.05  822.22
  -3   2  -419362.78  791.96
  -3   2   419685.51  983.45
  -3   2  -419544.48  823.54
   3   2  -420208.34  792.40
  -3  -2   419526.14  894.27
   3   2   422643.06  874.79
  -3  -2   420876.16  888.50
  -3  -2  -419300.13  762.70
  -3   2   421077.57  869.51
  -3   2  -419494.70  834.65
  -3   2  -422550.88 1261.52
  -3  -2  -418340.67  807.62
   3   2  -421068.77  902.06
   3  -2  -420211.30  883.72
  -3   2  -418964.68  863.03
  -3  -2  -419153.72  819.59
   3   2  -419397.91  803.30
   3  -2  -419476.00  872.40
   3  -2  -420123.10  772.59
  -3  -2   422098.65  852.77
   3  -2   421545.75  867.04
   3   2   419892.33  823.90
  -3  -2   5 4364.65  312.13
  -3   2   5 5323.11  384.97
  -3   2  -5 5330.22  364.59
  -3   2   5 4877.99  413.03
  -3   2  -5 5254.09  361.81
   3   2  -5 4483.37  321.17
  -3  -2   5 4421.15 1052.83
  -3   2   5 4695.85  513.19
  -3  -2   5 5416.00  428.81
  -3   2   5 5577.52  415.65
  -3  -2  -5 4442.51  411.70
  -3   2  -5 4802.03  511.63
  -3  -2  -5 4257.80  348.26
  -3   2  -5 4456.83  342.45
   3   2  -5 4987.67  397.55
   3  -2  -5 5014.73  414.82
  -3   2  -5 6210.63 1212.45
  -3  -2  -5 5145.57 1351.77
   3   2  -5 4626.45  366.75
   3  -2  -5 4968.54  456.25
  -3  -2  -5 5143.80  386.65
   3  -2   5 4758.67  381.75
  -3  -2   5 5092.56  332.19
   3  -2   5 5651.15  403.05
   3   2   5 5276.49  392.04
  -3  -2   624928.52 1118.70
  -3   2   622486.55 1017.97
  -3   2  -623550.98  907.18
  -3   2   623515.56 1049.10
  -3   2  -621206.12  853.05
   3   2  -624741.03  945.26
  -3  -2   623542.53  937.32
  -3   2   624538.19 1061.37
  -3   2   621280.06 1318.83
  -3   2  -624782.77  962.74
   3   2  -623922.90 1018.25
  -3  -2  -620822.40  982.52
  -3   2  -623692.74  959.13
   3  -2  -623340.79 1002.77
   3   2  -622484.86  924.67
  -3   2  -623241.56  993.83
  -3  -2  -623002.33  928.53
   3   2  -626240.61  981.64
   3  -2  -622811.46  944.32
  -3  -2  -623330.91  968.88
   3  -2   624303.48  997.46
  -3  -2   623549.94  886.38
   3  -2   623788.30  939.50
   3   2   622670.12  934.28
  -3  -2   719482.21  857.63
  -3   2   719124.10 1060.17
  -3   2  -717403.11  780.26
  -3   2   716935.96  938.26
  -3   2  -717408.61  798.01
   3   2  -717321.34  795.20
  -3  -2   718999.10  853.40
  -3   2   718689.03 2067.66
  -3   2   719530.36 1024.83
  -3   2  -718060.74 1134.34
   3   2  -717883.47  878.29
  -3   2  -718909.19  852.20
  -3  -2  -716582.93  818.54
   3  -2  -718283.17  894.50
   3   2  -720573.86  929.86
  -3   2  -717881.79  809.77
  -3  -2  -717332.26  830.73
   3  -2  -718409.39  846.49
   3   2  -719037.26  839.58
  -3  -2  -717687.34  853.79
   3  -2   720136.71  932.07
  -3  -2   718346.19  797.01
   3  -2   719822.37  873.73
   3   2   719431.93  890.62
  -3  -2   8 9713.77  619.28
  -3   2   810149.94  659.75
  -3   2  -810430.74  633.91
  -3   2   8 9551.81  634.44
  -3   2  -8 9683.85  614.50
   3   2  -810094.59  616.88
  -3  -2   810470.48 1982.41
  -3   2   810751.98  930.86
  -3   2  -8 9962.28  664.52
   3   2  -810382.46  712.23
   3  -2  -8 9197.32  617.43
  -3  -2  -8 8291.58  620.71
  -3   2  -810075.00 1299.85
   3   2  -8 9585.56  645.60
   3  -2  -8 9594.12  651.55
  -3   2  -810272.13 1634.44
  -3  -2  -8 9274.57  599.04
   3  -2  -810047.65  637.84
   3   2  -8 9245.85  947.74
  -3  -2  -810070.97  671.34
   3  -2   8 9374.44  620.24
   3  -2   8 9337.01  597.78
   3   2   811829.07  762.21
  -3  -2   9 1580.54  417.34
  -3   2   9 1389.56  363.78
  -3   2   9 1076.42  379.24
  -3   2  -9  714.08  242.43
   3   2  -9 1449.50  271.01
  -3  -2   9 1777.20  365.12
  -3   2   9 1462.02  404.97
  -3   2  -9 1405.69  462.21
   3   2  -9 1191.49  278.88
  -3  -2  -9 1879.59  541.71
  -3   2  -9 1943.67  490.27
   3  -2  -9 1628.46  409.93
   3   2  -9 1337.20  373.10
  -3   2  -9 1595.81  625.02
  -3  -2  -9 1806.06  396.55
   3   2  -9 1472.63  287.47
   3  -2  -9 1497.59  311.54
   3  -2   9 2443.95  356.22
   3  -2   9 1487.57  274.73
   3   2   9 1423.56  287.32
  -3  -2  10 8823.65 2131.11
  -3   2  1011525.96 2467.44
  -3   2 -10 8250.51 1994.21
   3   2 -1010046.05  634.69
   3  -2 -10 9294.49  622.98
  -3  -2  10 9428.19 2257.05
  -3   2  10 8827.88 1608.27
   3   2 -10 9215.38  761.69
  -3  -2 -10 8002.96 2295.25
  -3   2 -1010121.32  737.76
   3   2 -1010172.30  642.25
   3  -2 -1010290.27  690.78
  -3   2 -10 6704.52 2134.38
  -3  -2 -10 9566.73 2303.16
   3  -2 -1010522.33  658.67
   3  -2  1010798.40  699.43
   3   2  1010158.98  661.63
   3  -2  1010957.89  703.46
   3   2  10 9437.32  660.69
  -3  -2  11  290.25  343.06
  -3   2  11  310.21  168.46
  -3   2 -11  364.59  241.81
   3   2 -11  349.19  236.72
   3  -2 -11  390.70  255.36
  -3  -2  11  230.74  279.86
  -3   2  11  435.62  256.87
   3   2 -11  -91.05  355.41
  -3  -2 -11  275.77  185.67
  -3   2 -11  -20.09  253.76
   3   2 -11  281.60  279.46
   3  -2 -11  261.44  239.92
  -3   2 -11  350.71  223.76
  -3  -2 -11   88.34  250.06
   3  -2 -11  254.07  246.99
   3  -2  11  326.68  281.60
   3   2  11  239.73  240.49
   3  -2  11  201.65  271.73
   3   2  11  716.36  296.15
  -3  -2  11  791.30  337.85
  -3   2  11  618.31  236.21
  -3  -2  11  355.61  188.59
  -3   2  11   76.86  145.34
  -3   2  11  161.03  201.00
  -3  -2  11   76.61  111.71
  -3   2  11  199.46  134.77
  -3  -2 -11  457.39  131.70
  -3   2 -11  265.11  103.14
  -3  -2 -11  172.88  193.52
   3  -2 -11  496.19  284.16
  -3  -2 -11  102.46  171.94
  -3   2 -11  660.19  332.02
  -3  -2 -11  235.32  173.95
  -3  -2  12  293.65  300.04
  -3   2  12  263.09  421.30
   3   2 -12  360.15  332.64
   3  -2 -12  254.54  290.22
  -3   2 -12  568.35  347.21
  -3  -2 -12  400.49  198.51
   3   2 -12  251.53  303.53
   3  -2 -12  757.48  315.35
  -3  -2 -12  491.76  265.65
   3  -2 -12  553.70  312.81
   3   2  12 1905.26  578.96
   3  -2  12  810.86  339.84
   3   2  12 -242.55  296.73
  -3  -2  12  248.66  227.23
  -3   2  12  479.63  313.41
  -3  -2  12  356.70  170.54
  -3   2  12  563.30  170.82
  -3   2 -12  581.91  259.78
  -3  -2 -12  307.97  211.97
   3  -2 -12  219.15  256.13
   3   2 -12  494.84  210.74
  -3  -2 -12  289.76  218.14
   3  -2 -12  494.18  232.71
  -3  -2 -12  371.64  293.00
  -3   2 -12  721.25  249.28
  -3  -2 -12  321.66  423.79
  -3  -2  13 2940.74  402.45
  -3   2  13 3027.56  374.37
  -3  -2  13 3293.81  674.24
  -3   2  13 3593.78  562.42
  -3  -2 -13 3321.36  368.93
  -3   2 -13 3738.73  381.65
   3  -2 -13 4253.54  636.57
   3   2 -13 4218.87  635.45
  -3  -2 -13 4378.72  607.71
   3  -2 -13 2726.18  331.66
  -3  -2 -13 3328.94  931.85
   3  -2  13 3370.79  449.56
  -3  -2  1410865.63  736.37
  -3   2  1411200.17  743.80
  -3  -2  1411489.65 1757.37
  -3   2  14 9710.69  978.86
  -3   2 -1410704.33  766.47
  -3  -2 -1411217.91  754.29
   3  -2 -1411192.31  721.15
   3   2 -1412322.93  786.85
  -3  -2 -1411560.53  803.38
   3  -2 -1411403.24  718.70
  -3  -2 -1410847.73  958.29
   3  -2  1412572.52  803.97
  -3  -2  15 1664.62  359.93
  -3   2  15 1290.29  255.04
  -3  -2  15 1420.89  277.73
  -3   2  15 1503.15  318.86
  -3   2 -15 1257.44  331.40
  -3  -2 -15 1582.52  335.45
   3   2 -15 1134.88  247.48
   3  -2 -15  999.45  230.46
  -3  -2 -15 1687.11  315.06
   3  -2 -15 1153.09  233.61
  -3  -2 -15 1214.80  309.59
   3  -2  15 2309.20  485.16
  -3  -2  16 2341.08  705.12
  -3   2  16 3716.84  419.40
  -3  -2  16 2936.42  571.25
  -3   2  16 3614.23  747.84
  -3   2 -16 3062.03  866.08
  -3  -2 -16 2775.58  368.96
   3   2 -16 2582.63  831.75
   3  -2 -16 2761.71  719.72
  -3  -2 -16 2625.20  304.73
   3  -2 -16 2297.83  290.16
  -3  -2 -16 2908.84  712.11
   3  -2  16 3287.18  475.79
  -3  -2  17 3738.31  908.78
  -3   2  17 3385.50  316.47
  -3  -2  17 3865.27 1078.78
  -3   2  17 5471.08 1074.05
  -3   2 -17 4141.84  398.44
  -3  -2 -17 4216.71  367.87
   3   2 -17 3843.46  344.88
   3  -2 -17 3634.80  357.13
  -3  -2 -17 4120.54  338.73
   3  -2 -17 2789.91  833.12
   3  -2  17 5630.01  742.09
   3   2  17 4488.03  423.44
  -3  -2  18 1943.13  383.39
  -3   2  18 1820.47  371.82
  -3  -2  18 1282.30  353.09
  -3   2  18  936.89  268.34
  -3   2 -18 1029.84  232.13
  -3  -2 -18 1848.89  258.41
   3   2 -18 1151.28  371.82
   3  -2 -18 1014.59  268.18
  -3  -2 -18  821.07  174.35
   3  -2 -18  964.67  253.20
   3  -2  18 1782.93  266.33
   3   2  18 2069.97  341.90
  -3  -2  19  169.00  129.61
  -3   2  19  118.95   69.71
  -3  -2  19   50.05  110.91
  -3   2  19   31.72   92.65
  -3  -2 -19  201.62  180.61
  -3   2 -19  113.00   63.62
   3  -2 -19   43.35   95.92
   3   2 -19   32.45  113.22
  -3  -2 -19  176.93  102.98
   3   2  19   79.53  117.65
  -3   3   066489.80 2181.97
  -3   3   065787.94 2174.10
  -3  -3   064918.55 2135.54
  -3   3   064273.12 2113.06
  -3  -3   064862.89 2241.06
  -3   3   066092.63 2268.52
  -3   3   065966.27 2160.45
  -3  -3   067405.41 2208.74
  -3  -3   066805.78 2225.95
   3  -3   062580.48 2100.99
  -3  -3   066491.84 2198.85
   3  -3   066800.07 2207.40
  -3  -3   065779.73 2149.69
  -3   3   1 6721.39  402.56
  -3   3  -1 6956.06  402.40
  -3   3   1 7744.15  829.63
  -3   3  -1 6623.62  616.76
  -3  -3  -1 6861.89  378.82
  -3  -3   1 6488.28  379.69
  -3   3   1 7200.05  425.27
  -3   3  -1 6687.15  369.06
  -3  -3  -1 6457.46  384.82
  -3  -3   1 7248.42  429.57
  -3   3   1 6885.62  398.50
  -3   3  -1 7800.59  494.82
  -3  -3   1 6979.17  419.03
  -3   3   1 7776.67  459.40
  -3  -3  -1 7323.14  638.27
  -3   3  -1 6963.32  398.58
  -3  -3   1 6776.57  374.15
  -3  -3  -1 6370.17  364.08
   3  -3  -1 6283.83  401.90
   3  -3   1 7257.03  442.99
  -3  -3  -1 7696.87  442.65
  -3  -3   1 7248.95  397.68
   3  -3  -1 7219.57  433.13
   3  -3   1 6661.65  436.95
  -3  -3  -1 7531.47  578.47
  -3  -3   1 7010.64  387.69
  -3  -3   2 6882.38  346.16
  -3   3   2 6378.51  401.37
  -3   3  -2 7093.66  442.88
  -3   3   2 6272.06  415.72
  -3   3  -2 5801.56  360.81
   3   3  -2 6896.16  338.96
  -3  -3  -2 5439.70  343.63
  -3  -3   2 6005.65  413.71
  -3   3   2 6075.68  412.17
  -3   3  -2 6517.01  599.30
  -3  -3   2 6115.29  565.65
  -3  -3  -2 5928.12  409.96
  -3   3   2 6051.98  366.04
  -3   3  -2 6061.03  399.04
  -3   3  -2 6439.78  383.65
  -3  -3  -2 5943.61  359.58
   3  -3  -2 5844.06  403.02
   3   3  -2 5719.50  376.53
  -3  -3  -2 6610.15  417.23
   3  -3  -2 6000.41  434.75
   3   3  -2 6640.66  378.02
  -3  -3   2 6884.10  732.39
  -3  -3  -2 6268.40  461.89
   3  -3  -2 6310.40  398.84
   3  -3   2 6119.78  414.09
  -3  -3  -2 5977.54  813.36
  -3  -3   2 5512.90  364.48
   3  -3   2 6651.22  344.18
  -3  -3   3 7531.24  386.23
  -3   3   3 7116.32  423.44
  -3   3  -3 7325.70  444.21
  -3   3   3 7506.47  464.63
  -3   3  -3 7039.60  414.32
   3   3  -3 8367.85  402.50
  -3   3  -3 7137.06  361.06
  -3   3   3 6699.44  421.97
   3   3   3 7676.79  455.97
  -3  -3  -3 6741.88  384.72
  -3   3   3 7966.18  444.10
  -3   3  -3 7666.88  462.05
  -3   3  -3 6819.85  460.30
  -3  -3  -3 7518.33  446.67
   3  -3  -3 7712.74  486.38
   3   3  -3 8270.65  492.18
  -3   3  -3 7368.85  441.28
  -3  -3  -3 7630.87  448.56
   3  -3  -3 7530.90  487.74
[truncated: 446,041 more chars]
